# Supplementary material for: Identification and Diversity of Killer Cell Ig-Like Receptors in Aotus vociferans, a New World Monkey
Source: PubMed Central journal article supplement (PMC3819253; doi:10.1371/journal.pone.0079731), 2013-11-06
Supplement: pone.0079731.s011.pdf [file pone.0079731.s011.pdf]

EXON 1

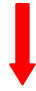

\* 20 \* 40 \* 60 \* 80 \*

BAC\_clone\_Om : ATGTCACTCATGGTCATCAGCATGGCATGTGTCTGGAGTCCTGGAGGGAATCCAGGGGGGAGCGATGGGGTGGGGATCCCAGCCTGGAGCGGAGA : 96  
AOTVOKIR3DL1\*01 : ---TCACTCATGGTCATCAGCATGGCATGTGTCTGGAGTCCTGGAGGGAATCCAGGGGGGAGCGATGGGGTGGGGATCCCAGCCTGGAGCGGAGA : 31  
AOTVOKIR2DL1\*01v1 : ---TCACTCATGGTCATCAGCATGGCATGTGTCTGGAGTCCTGGAGGGAATCCAGGGGGGAGCGATGGGGTGGGGATCCCAGCCTGGAGCGGAGA : 31  
AOTVOKIR3DS1\*01v2 : ---TCACTCATGGTCATCAGCATGGCATGTGTCTGGAGTCCTGGAGGGAATCCAGGGGGGAGCGATGGGGTGGGGATCCCAGCCTGGAGCGGAGA : 31  
AOTVOKIR3DS1\*02 : ---TCACTCATGGTCATCAGCATGGCATGTGTCTGGAGTCCTGGAGGGAATCCAGGGGGGAGCGATGGGGTGGGGATCCCAGCCTGGAGCGGAGA : 31  
AOTVOKIR3DL2\*01 : ---TCACTCATGGTCATCAGCATGGCATGTGTCTGGAGTCCTGGAGGGAATCCAGGGGGGAGCGATGGGGTGGGGATCCCAGCCTGGAGCGGAGA : 31  
AOTVOKIR3DL2\*01v1 : ---TCACTCATGGTCATCAGCATGGCATGTGTCTGGAGTCCTGGAGGGAATCCAGGGGGGAGCGATGGGGTGGGGATCCCAGCCTGGAGCGGAGA : 31  
AOTVOKIR3DL2\*02 : ---TCACTCATGGTCATCAGCATGGCATGTGTCTGGAGTCCTGGAGGGAATCCAGGGGGGAGCGATGGGGTGGGGATCCCAGCCTGGAGCGGAGA : 31  
AOTVOKIR3DS3\*01 : ---TCACTCATGGTCATCAGCATGGCATGTGTCTGGAGTCCTGGAGGGAATCCAGGGGGGAGCGATGGGGTGGGGATCCCAGCCTGGAGCGGAGA : 31  
AOTVOKIR3DS3\*02 : ---TCACTCATGGTCATCAGCATGGCATGTGTCTGGAGTCCTGGAGGGAATCCAGGGGGGAGCGATGGGGTGGGGATCCCAGCCTGGAGCGGAGA : 31  
AOTVOKIR3DS3\*03 : ---CACTCATGGTCATCAGCATGGCATGTGTCTGGAGTCCTGGAGGGAATCCAGGGGGGAGCGATGGGGTGGGGATCCCAGCCTGGAGCGGAGA : 30  
AOTVOKIR3DS3\*03v1 : ---CACTCATGGTCATCAGCATGGCATGTGTCTGGAGTCCTGGAGGGAATCCAGGGGGGAGCGATGGGGTGGGGATCCCAGCCTGGAGCGGAGA : 30  
tCACTCATGGTCATCAGCATGGCATGTGTCTGGAGTCCTGGAGGGAATCCAGGGGGGAGCGATGGGGTGGGGATCCCAGCCTGGAGCGGAGA

100 \* 120 \* 140 \* 160 \* 180 \*

BAC\_clone\_Om : TATGAGCCTGGAGTGGAGATACGGGCCTGGAAGTGTAGACCTGGGCCTGGAGCCTGGGTCTCTGCACAGCCAAGAGCCCTGTTCCCTGCCGTCAGG : 192  
AOTVOKIR3DL1\*01 : ----- : -  
AOTVOKIR2DL1\*01v1 : ----- : -  
AOTVOKIR3DS1\*01v2 : ----- : -  
AOTVOKIR3DS1\*02 : ----- : -  
AOTVOKIR3DL2\*01 : ----- : -  
AOTVOKIR3DL2\*01v1 : ----- : -  
AOTVOKIR3DL2\*02 : ----- : -  
AOTVOKIR3DS3\*01 : ----- : -  
AOTVOKIR3DS3\*02 : ----- : -  
AOTVOKIR3DS3\*03 : ----- : -  
AOTVOKIR3DS3\*03v1 : ----- : -

200 \* 220 \* 240 \* 260 \* 280 \*

BAC\_clone\_Om : TAGGCAATGAGGCTGAGTTTACCTTTAGCCCATCAAGGGCCTGGCTGCCAATGCGCACAGCCCCAACAGGACAGCAGGGGAGGCCTGGTTTGTGTG : 288  
AOTVOKIR3DL1\*01 : ----- : -  
AOTVOKIR2DL1\*01v1 : ----- : -  
AOTVOKIR3DS1\*01v2 : ----- : -  
AOTVOKIR3DS1\*02 : ----- : -  
AOTVOKIR3DL2\*01 : ----- : -  
AOTVOKIR3DL2\*01v1 : ----- : -  
AOTVOKIR3DL2\*02 : ----- : -  
AOTVOKIR3DS3\*01 : ----- : -  
AOTVOKIR3DS3\*02 : ----- : -  
AOTVOKIR3DS3\*03 : ----- : -  
AOTVOKIR3DS3\*03v1 : ----- : -

EXON 2

\* 300 \* 320 \* 340 \* 360 \* 380

BAC\_clone\_Om : CAGATGAATCATCCATCATGATCTCTCTTTCCAGGGTACTTCTTGGTCCAGAGGGCCTGGACACATGAGGCTAAGTCCTTCCCTAAACTTTAGGGT : 384

AOTVOKIR3DL1\*01 : -----GGTTCTTCTTGGTCCAGAGGGCCTGGACACATGAGG----- : 67

AOTVOKIR2DL1\*01v1 : -----GGTTCTTCTTGGTCCAGAGGGCCTGGACACATGAGG----- : 67

AOTVOKIR3DS1\*01v2 : -----GGTTCTTCTTGGTCCAGAGGGCCTGGACACATGAGG----- : 67

AOTVOKIR3DS1\*02 : -----GGTTCTTCTTGGTCCAGAGGGCCTGGACACATGAGG----- : 67

AOTVOKIR3DL2\*01 : -----GGTTCTTCTTGGTCCAGAGGGCCTGGACACATGAGG----- : 67

AOTVOKIR3DL2\*01v1 : -----GGTTCTTCTTGGTCCAGAGGGCCTGGACACATGAGG----- : 67

AOTVOKIR3DL2\*02 : -----GGTTCTTCTTGGTCCAGAGGGCCTGGACACATGAGG----- : 67

AOTVOKIR3DS3\*01 : ----- : -

AOTVOKIR3DS3\*02 : ----- : -

AOTVOKIR3DS3\*03 : -----AGGGCCTGGACACATGAGG----- : 49

AOTVOKIR3DS3\*03v1 : -----AGGGCCTGGACACATGAGG----- : 49

agggcctggacacatgagg

\* 400 \* 420 \* 440 \* 460 \* 480

BAC\_clone\_Om : GTCATCTCCCCACATAAGAGGATTTTCTGAAACAGGAGGGAAGCCCTGTGGGGGAGTCTCTCATGAACTAGGAAGAGGGGACCCTGGGATGCTCA : 480

AOTVOKIR3DL1\*01 : ----- : -

AOTVOKIR2DL1\*01v1 : ----- : -

AOTVOKIR3DS1\*01v2 : ----- : -

AOTVOKIR3DS1\*02 : ----- : -

AOTVOKIR3DL2\*01 : ----- : -

AOTVOKIR3DL2\*01v1 : ----- : -

AOTVOKIR3DL2\*02 : ----- : -

AOTVOKIR3DS3\*01 : ----- : -

AOTVOKIR3DS3\*02 : ----- : -

AOTVOKIR3DS3\*03 : ----- : -

AOTVOKIR3DS3\*03v1 : ----- : -

\* 500 \* 520 \* 540 \* 560 \*

BAC\_clone\_Om : GCCCAGTTCTGACCTAGCCCTTCCCAGCCTTTCCTTCCCTTGGCTGAGTCAAGCTCTGTGGGGACCGGGGTGAGACTGGGGTGCTCCAAGCTGGGG : 576

AOTVOKIR3DL1\*01 : ----- : -

AOTVOKIR2DL1\*01v1 : ----- : -

AOTVOKIR3DS1\*01v2 : ----- : -

AOTVOKIR3DS1\*02 : ----- : -

AOTVOKIR3DL2\*01 : ----- : -

AOTVOKIR3DL2\*01v1 : ----- : -

AOTVOKIR3DL2\*02 : ----- : -

AOTVOKIR3DS3\*01 : ----- : -

AOTVOKIR3DS3\*02 : ----- : -

AOTVOKIR3DS3\*03 : ----- : -

AOTVOKIR3DS3\*03v1 : ----- : -

580 \* 600 \* 620 \* 640 \* 660 \*

BAC\_clone\_Om : TGTGCAGGGAGGAAGTCATGTCACCGGCAGAGGAAGGGAGGGAAGCAGTGCTAGGAAAGGCCGACCCTCTGAGGACAAAGGTGTAACCTCACACACT : 672  
AOTVOKIR3DL1\*01 : ----- : -  
AOTVOKIR2DL1\*01v1 : ----- : -  
AOTVOKIR3DS1\*01v2 : ----- : -  
AOTVOKIR3DS1\*02 : ----- : -  
AOTVOKIR3DL2\*01 : ----- : -  
AOTVOKIR3DL2\*01v1 : ----- : -  
AOTVOKIR3DL2\*02 : ----- : -  
AOTVOKIR3DS3\*01 : ----- : -  
AOTVOKIR3DS3\*02 : ----- : -  
AOTVOKIR3DS3\*03 : ----- : -  
AOTVOKIR3DS3\*03v1 : ----- : -

680 \* 700 \* 720 \* 740 \* 760  
BAC\_clone\_Om : CCAGCGTTTCCATGACGGTAGGGGCTGCTGTGTGGCTGCTGTCATTCTACCAGGAGAGGTGGGGGAACCGCAGCCGTGAGCTTCACATTCTAAATC : 768  
AOTVOKIR3DL1\*01 : ----- : -  
AOTVOKIR2DL1\*01v1 : ----- : -  
AOTVOKIR3DS1\*01v2 : ----- : -  
AOTVOKIR3DS1\*02 : ----- : -  
AOTVOKIR3DL2\*01 : ----- : -  
AOTVOKIR3DL2\*01v1 : ----- : -  
AOTVOKIR3DL2\*02 : ----- : -  
AOTVOKIR3DS3\*01 : ----- : -  
AOTVOKIR3DS3\*02 : ----- : -  
AOTVOKIR3DS3\*03 : ----- : -  
AOTVOKIR3DS3\*03v1 : ----- : -

\* 780 \* 800 \* 820 \* 840 \* 860  
BAC\_clone\_Om : CTCTGATGGGGGCTCAGTTGTTTATTGTGGTTTCACGCAGTGGCTGATACTCCATTACAAAGGACCTGCCCCACCCCGTGTCTACCTTGTGTTGT : 864  
AOTVOKIR3DL1\*01 : ----- : -  
AOTVOKIR2DL1\*01v1 : ----- : -  
AOTVOKIR3DS1\*01v2 : ----- : -  
AOTVOKIR3DS1\*02 : ----- : -  
AOTVOKIR3DL2\*01 : ----- : -  
AOTVOKIR3DL2\*01v1 : ----- : -  
AOTVOKIR3DL2\*02 : ----- : -  
AOTVOKIR3DS3\*01 : ----- : -  
AOTVOKIR3DS3\*02 : ----- : -  
AOTVOKIR3DS3\*03 : ----- : -  
AOTVOKIR3DS3\*03v1 : ----- : -

\* 880 \* 900 \* 920 \* 940 \* 960  
BAC\_clone\_Om : TTTATGTAAGCAATTTTGCTGTATTCAAATCTAGTAGGAGTCCCTCATTACGCACTTACGCAAAGTTCTCAGCTGACACGTTTGTAGTAGGAAGAC : 960

```

AOTVOKIR3DL1*01      : ----- : -
AOTVOKIR2DL1*01v1    : ----- : -
AOTVOKIR3DS1*01v2    : ----- : -
AOTVOKIR3DS1*02      : ----- : -
AOTVOKIR3DL2*01      : ----- : -
AOTVOKIR3DL2*01v1    : ----- : -
AOTVOKIR3DL2*02      : ----- : -
AOTVOKIR3DS3*01      : ----- : -
AOTVOKIR3DS3*02      : ----- : -
AOTVOKIR3DS3*03      : ----- : -
AOTVOKIR3DS3*03v1    : ----- : -

```

```

          *       980          *       1000          *       1020          *       1040          *
BAC_clone_Om      : GCCATGTCTATTCAGGATGGGTCCTTCCTGTATCTCTGGGCACCCAGGTGTCGTAGGAGCCTTAGAAATGTGGAAAAGGGAGAATCTTCTGAGCA : 1056
AOTVOKIR3DL1*01    : ----- : -
AOTVOKIR2DL1*01v1  : ----- : -
AOTVOKIR3DS1*01v2  : ----- : -
AOTVOKIR3DS1*02    : ----- : -
AOTVOKIR3DL2*01    : ----- : -
AOTVOKIR3DL2*01v1  : ----- : -
AOTVOKIR3DL2*02    : ----- : -
AOTVOKIR3DS3*01    : ----- : -
AOTVOKIR3DS3*02    : ----- : -
AOTVOKIR3DS3*03    : ----- : -
AOTVOKIR3DS3*03v1  : ----- : -

```

```

          1060          *       1080          *       1100          *       1120          *       1140          *
BAC_clone_Om      : CAGGGAGAGAGGGGCCGCTCCACATCTTCCTCTCTAAGGCAATGCCTCCTGCTCCCCCAGGTGGTCCGGACAAGCCCTTCCTGTCTGCCTGGCCCA : 1152
AOTVOKIR3DL1*01    : ----- : 103
AOTVOKIR2DL1*01v1  : ----- : 103
AOTVOKIR3DS1*01v2  : ----- : 103
AOTVOKIR3DS1*02    : ----- : 103
AOTVOKIR3DL2*01    : ----- : 103
AOTVOKIR3DL2*01v1  : ----- : 103
AOTVOKIR3DL2*02    : ----- : 103
AOTVOKIR3DS3*01    : ----- : 67
AOTVOKIR3DS3*02    : ----- : 67
AOTVOKIR3DS3*03    : ----- : 85
AOTVOKIR3DS3*03v1  : ----- : 85

```

↓  
**EXON 3**

GTGGTC GGACAAGCCCTTCCTGTCTGCCTGGC CA

```

          1160          *       1180          *       1200          *       1220          *       1240
BAC_clone_Om      : GCGCTGTGGTGCTTCAAGGCAGAAATGTGACTCTTCAGTGTCTACTATCGTCTTGGGTTTAAACAAGTTCATGTTGTACAAGGAAGACCGAATCAACG : 1248
AOTVOKIR3DL1*01    : GCCCTGTGGTGCTTCAAGGAGGACACATGACTCTTCAGTGTCTACTATCGTCTTGGGTTTAAACAAGTTCATGTTGTACAAGGAAGACCGAATCAACG : 199

```

```

AOTVOKIR2DL1*01v1 : GCCCTGTGGTGCTTCAAGGAGGACACATGACTCTTCAGTGTACTATCGTCTTGGGTTTAAACAAGTTCATGTTGTACAAGGAAGACCGAATCAACG : 199
AOTVOKIR3DS1*01v2 : GCCCTGTGGTGCTTCAAGGAGGACACATGACTCTTCAGTGTACTATCGTCTTGGGTTTAAACAAGTTCATGTTGTACAAGGAAGACCGAATCAACG : 199
AOTVOKIR3DS1*02 : GCCCTGTGGTGCTTCAAGGAGGACACATGACTCTTCAGTGTACTATCGTCTTGGGTTTAAACAAGTTCATGTTGTACAAGGAAGACCGAATCAACG : 199
AOTVOKIR3DL2*01 : GCCCTGTGGTGCTTCAAGGAGGACACATGACTCTTCAGTGTACTATCGTCTTGGGTTTAAACAAGTTCATGTTGTACAAGGAAGACCGAATCAACG : 199
AOTVOKIR3DL2*01v1 : GCCCTGTGGTGCTTCAAGGAGGACACATGACTCTTCAGTGTACTATCGTCTTGGGTTTAAACAAGTTCATGTTGTACAAGGAAGACCGAATCAACG : 199
AOTVOKIR3DL2*02 : GCCCTGTGGTGCTTCAAGGAGGACACATGACTCTTCAGTGTACTATCGTCTTGGGTTTAAACAAGTTCATGTTGTACAAGGAAGACCGAATCAACG : 199
AOTVOKIR3DS3*01 : GCGCTGTGGTGCTTCAAGGAGGACACGCTGACTCTTCAGTGTACTATCGTCTTGGGTTTAAACAAGTTCATGTTGTACAAGGAAGACCGAATCAATG : 163
AOTVOKIR3DS3*02 : GCGCTGTGGTGCTTCAAGGAGGACACGCTGACTCTTCAGTGTACTATCGTCTTGGGTTTAAACAAGTTCATGTTGTACAAGGAAGACCGAATCAATG : 163
AOTVOKIR3DS3*03 : GCGCTGTGGTGCTTCAAGGAGGACACGCTGACTCTTCAGTGTACTATCGTCTTGGGTTTAAACAAGTTCATGTTGTACAAGGAAGACCGAATCAATG : 181
AOTVOKIR3DS3*03v1 : GCGCTGTGGTGCTTCAAGGAGGACACGCTGACTCTTCAGTGTACTATCGTCTTGGGTTTAAACAAGTTCATGTTGTACAAGGAAGACCGAATCAATG : 181

```

GC CTGTGGTGCTTCAAGG GA A TGACTCTTCAGTGTACTATCGTCTTGGGTTTAAACAAGTTCATGTTGTACAAGGAAGACCGAATCAA G

```

*      1260      *      1280      *      1300      *      1320      *      1340
BAC_clone_Om      : TTCCCATCCTCCAGGGCAGAATATTCAGGAGAGCTTTCTCATGGGCCCTGTGACCCCAGCACACGCAGGGACCTACAGATGCCGGGCTTCTCACC : 1344
AOTVOKIR3DL1*01   : TTCCCAGCCTCCAGGGCAGAATATTCAGGAGAGCTTTCTCATGGGCCCTGTGACCCCAGCACACGCAGGGACCTACAGATGCCGGGCTTCTCACC : 295
AOTVOKIR2DL1*01v1 : TTCCCAGCCTCCAGGGCAGAATATTCAGGAGAGCTTTCTCATGGGCCCTGTGACCCCAGCACACGCAGGGACCTACAGATGCCGGGCTTCTCACC : 295
AOTVOKIR3DS1*01v2 : TTCCCAGCCTCCAGGGCAGAATATTCAGGAGAGCTTTCTCATGGGCCCTGTGACCCCAGCACACGCAGGGACCTACAGATGCCGGGCTTCTCACC : 295
AOTVOKIR3DS1*02   : TTCCCAGCCTCCAGGGCAGAATATTCAGGAGAGCTTTCTCATGGGCCCTGTGACCCCAGCACACGCAGGGACCTACAGATGCCGGGCTTCTCACC : 295
AOTVOKIR3DL2*01   : TTCCCATCCTCCAGGGCAGAATACTCCAGGAGAGCTTTCTCATGGGCCCTGTGACCCCAGCACACGCAGGGACCTACAGATGCCGGGCTTCTCACC : 295
AOTVOKIR3DL2*01v1 : TTCCCATCCTCCAGGGCAGAATACTCCAGGAGAGCTTTCTCATGGGCCCTGTGACCCCAGCACACGCAGGGACCTACAGATGCCGGGCTTCTCACC : 295
AOTVOKIR3DL2*02   : TTCCCATCCTCCAGGGCAGAATACTCCAGGAGAGCTTTCTCATGGGCCCTGTGACCCCAGCACACGCAGGGACCTACAGATGCCGGGCTTCTCACC : 295
AOTVOKIR3DS3*01   : TTCCCATCCTCCAGGGCAGAATATTCAGGAGAGCTTTCTCATGGGCCCTGTGACCCCAGCACACGCAGGGACCTACAGATGCCGGGCTTCTCACC : 259
AOTVOKIR3DS3*02   : TTCCCATCCTCCAGGGCAGAATATTCAGGAGAGCTTTCTCATGGGCCCTGTGACCCCAGCACACGCAGGGACCTACAGATGCCGGGCTTCTCACC : 259
AOTVOKIR3DS3*03   : TTCCCATCCTCCAGGGCAGAATATTCAGGAGAGCTTTCTCATGGGCCCTGTGACCCCAGCACACGCAGGGACCTACAGATGCCGGGCTTCTCACC : 277
AOTVOKIR3DS3*03v1 : TTCCCATCCTCCAGGGCAGAATATTCAGGAGAGCTTTCTCATGGGCCCTGTGACCCCAGCACACGCAGGGACCTACAGATGCCGGGCTTCTCACC : 277

```

TTCCCA CCTCCAGGGCAGAATA TCCAGGAG GCTTTCTCATGGGCCCTGTGACCCCAGCACACGCAGGGACCTACaGATGCCGGGCTTCTCACC

```

*      1360      *      1380      *      1400      *      1420      *      1440
BAC_clone_Om      : CGCACTCACCTACTCCATGGTCGGCACTCAGTAACCCCCTGGTGATCAGGGTCACAGGTCAGAGGGCTCCTGCCTGGGCTTCTCACTGTCCCACCT : 1440
AOTVOKIR3DL1*01   : CCCACTCGCCTACTCCGTTGGTCGGCACTCAGTAACCCCCTGGTGATCAGGGTCACAG----- : 352
AOTVOKIR2DL1*01v1 : CCCACTCGCCTACTCCGTTGGTCGGCACTCAGTAACCCCCTGGTGATCAGGGTCACAG----- : 352
AOTVOKIR3DS1*01v2 : CCCACTCGCCTACTCCGTTGGTCGGCACTCAGTAACCCCCTGGTGATCAGGGTCACAG----- : 352
AOTVOKIR3DS1*02   : CCCACTCGCCTACTCCGTTGGTCGGCACTCAGTAACCCCCTGGTGATCAGGGTCACAG----- : 352
AOTVOKIR3DL2*01   : CCCACTCGCCTACTCCGTTGGTCGGCACTCAGTAACCCCCTGGTGATCAGGGTCACAG----- : 352
AOTVOKIR3DL2*01v1 : CCCACTCGCCTACTCCGTTGGTCGGCACTCAGTAACCCCCTGGTGATCAGGGTCACAG----- : 352
AOTVOKIR3DL2*02   : CCCACTCGCCTACTCCGTTGGTCGGCACTCAGTAACCCCCTGGTGATCAGGGTCACAG----- : 352
AOTVOKIR3DS3*01   : CCCACTCGCCTACTCCGTTGGTCGGCACTCAGTAACCCCCTGGTGATCAGGGTCACAG----- : 316
AOTVOKIR3DS3*02   : CCCACTCGCCTACTCCGTTGGTCGGCACTCAGTAACCCCCTGGTGATCAGGGTCACAG----- : 316
AOTVOKIR3DS3*03   : CCCACTCGCCTACTCCGTTGGTCGGCACTCAGTAACCCCCTGGTGATCAGGGTCACAG----- : 334
AOTVOKIR3DS3*03v1 : CCCACTCGCCTACTCCGTTGGTCGGCACTCAGTAACCCCCTGGTGATCAGGGTCACAG----- : 334

```

CcCACTCGCCTACTCCGTTGGTCGGCACTCAGTAACCCCCTGGTGATCAGGGTCACAG

```

*      1460      *      1480      *      1500      *      1520      *
BAC_clone_Om      : CCTGAATCACAGAGCTTCCA-GGCCCTGACTGTATTTGAGGTTAAGGGGATTGAATACAGGGAAGTGGGTGCTGTGGTGGGAAGAATAACTCTCCC : 1535
AOTVOKIR3DL1*01   : ----- : -
AOTVOKIR2DL1*01v1 : ----- : -

```

AOTVOKIR3DS1\*01v2 : ----- : -  
AOTVOKIR3DS1\*02 : ----- : -  
AOTVOKIR3DL2\*01 : ----- : -  
AOTVOKIR3DL2\*01v1 : ----- : -  
AOTVOKIR3DL2\*02 : ----- : -  
AOTVOKIR3DS3\*01 : ----- : -  
AOTVOKIR3DS3\*02 : ----- : -  
AOTVOKIR3DS3\*03 : ----- : -  
AOTVOKIR3DS3\*03v1 : ----- : -

1540 \* 1560 \* 1580 \* 1600 \* 1620 \*  
BAC\_clone\_Om : CAATGATGGCCACATTCTCATCCCTGGAGCCTGTTACT--ATTTATGTTACAGGGCAGGGCACTGAAGGGGGAAGATGGAGCTCAGGTTGTTGATG : 1629  
AOTVOKIR3DL1\*01 : ----- : -  
AOTVOKIR2DL1\*01v1 : ----- : -  
AOTVOKIR3DS1\*01v2 : ----- : -  
AOTVOKIR3DS1\*02 : ----- : -  
AOTVOKIR3DL2\*01 : ----- : -  
AOTVOKIR3DL2\*01v1 : ----- : -  
AOTVOKIR3DL2\*02 : ----- : -  
AOTVOKIR3DS3\*01 : ----- : -  
AOTVOKIR3DS3\*02 : ----- : -  
AOTVOKIR3DS3\*03 : ----- : -  
AOTVOKIR3DS3\*03v1 : ----- : -

1640 \* 1660 \* 1680 \* 1700 \* 1720 \*  
BAC\_clone\_Om : AGTTGACCTTGAGATGGGGAGGCCACCTGGACTGTCCAGCTGGGCTCAGTGTCATCACAAAGTGCCACATGAGAGGAGGAGGAAGAGGGGAATGGG : 1725  
AOTVOKIR3DL1\*01 : ----- : -  
AOTVOKIR2DL1\*01v1 : ----- : -  
AOTVOKIR3DS1\*01v2 : ----- : -  
AOTVOKIR3DS1\*02 : ----- : -  
AOTVOKIR3DL2\*01 : ----- : -  
AOTVOKIR3DL2\*01v1 : ----- : -  
AOTVOKIR3DL2\*02 : ----- : -  
AOTVOKIR3DS3\*01 : ----- : -  
AOTVOKIR3DS3\*02 : ----- : -  
AOTVOKIR3DS3\*03 : ----- : -  
AOTVOKIR3DS3\*03v1 : ----- : -

\* 1740 \* 1760 \* 1780 \* 1800 \* 1820 \*  
BAC\_clone\_Om : GATTAGAGCAGCGTAGTGGGAGGGAGACTCCACCAGCCACTGCGGCCTCTG--CAGGTGGAGGACAGCCAGGAGCCATGAATGCAGGTGGCCTCTA : 1819  
AOTVOKIR3DL1\*01 : ----- : -  
AOTVOKIR2DL1\*01v1 : ----- : -  
AOTVOKIR3DS1\*01v2 : ----- : -

AOTVOKIR3DS1\*02 : ----- : -  
AOTVOKIR3DL2\*01 : ----- : -  
AOTVOKIR3DL2\*01v1 : ----- : -  
AOTVOKIR3DL2\*02 : ----- : -  
AOTVOKIR3DS3\*01 : ----- : -  
AOTVOKIR3DS3\*02 : ----- : -  
AOTVOKIR3DS3\*03 : ----- : -  
AOTVOKIR3DS3\*03v1 : ----- : -

                  \*          1840                  \*          1860                  \*          1880                  \*          1900                  \*          1920  
BAC\_clone\_Om : AGGGCTGGAGAAGTCAAGGGAAGTCTCCCTGAGTCTCCAGACGGAATTCAGCCCTACAGATGCCCTGATTTTAGCCCAGGGAGAAGTGGGC : 1915  
AOTVOKIR3DL1\*01 : ----- : -  
AOTVOKIR2DL1\*01v1 : ----- : -  
AOTVOKIR3DS1\*01v2 : ----- : -  
AOTVOKIR3DS1\*02 : ----- : -  
AOTVOKIR3DL2\*01 : ----- : -  
AOTVOKIR3DL2\*01v1 : ----- : -  
AOTVOKIR3DL2\*02 : ----- : -  
AOTVOKIR3DS3\*01 : ----- : -  
AOTVOKIR3DS3\*02 : ----- : -  
AOTVOKIR3DS3\*03 : ----- : -  
AOTVOKIR3DS3\*03v1 : ----- : -

                  \*          1940                  \*          1960                  \*          1980                  \*          2000                  \*  
BAC\_clone\_Om : CCGATTTCTGTCTCCAGAAGTGAAGGGCTCAGTGTGTTCTCTCCTGCCGTCATGTTTTGACAATTTTCTACAGCAGCAACAGCAAACAACACAGG : 2011  
AOTVOKIR3DL1\*01 : ----- : -  
AOTVOKIR2DL1\*01v1 : ----- : -  
AOTVOKIR3DS1\*01v2 : ----- : -  
AOTVOKIR3DS1\*02 : ----- : -  
AOTVOKIR3DL2\*01 : ----- : -  
AOTVOKIR3DL2\*01v1 : ----- : -  
AOTVOKIR3DL2\*02 : ----- : -  
AOTVOKIR3DS3\*01 : ----- : -  
AOTVOKIR3DS3\*02 : ----- : -  
AOTVOKIR3DS3\*03 : ----- : -  
AOTVOKIR3DS3\*03v1 : ----- : -

                  2020                  \*          2040                  \*          2060                  \*          2080                  \*          2100                  \*  
BAC\_clone\_Om : AACCCAGGGCAAGGACAAGTCAAGAAACCACACCAGGAGAAGGGTGGCCACCCCGAGATCAGCAAGAGAGGGATGCTGAGGCCACCACCAGGCTGG : 2107  
AOTVOKIR3DL1\*01 : ----- : -  
AOTVOKIR2DL1\*01v1 : ----- : -  
AOTVOKIR3DS1\*01v2 : ----- : -  
AOTVOKIR3DS1\*02 : ----- : -

AOTVOKIR3DL2\*01 : ----- : -  
AOTVOKIR3DL2\*01v1 : ----- : -  
AOTVOKIR3DL2\*02 : ----- : -  
AOTVOKIR3DS3\*01 : ----- : -  
AOTVOKIR3DS3\*02 : ----- : -  
AOTVOKIR3DS3\*03 : ----- : -  
AOTVOKIR3DS3\*03v1 : ----- : -

2120 \* 2140 \* 2160 \* 2180 \* 2200  
BAC\_clone\_Om : AGCCACATAGGGAGGGGTCGATGCTCCTGAAACCAGCACCAGGGACCGCCCTATGGAAGCTGGGAC-CATGGAGAAGCACAGACATGGCAGGAGAG : 2202  
AOTVOKIR3DL1\*01 : ----- : -  
AOTVOKIR2DL1\*01v1 : ----- : -  
AOTVOKIR3DS1\*01v2 : ----- : -  
AOTVOKIR3DS1\*02 : ----- : -  
AOTVOKIR3DL2\*01 : ----- : -  
AOTVOKIR3DL2\*01v1 : ----- : -  
AOTVOKIR3DL2\*02 : ----- : -  
AOTVOKIR3DS3\*01 : ----- : -  
AOTVOKIR3DS3\*02 : ----- : -  
AOTVOKIR3DS3\*03 : ----- : -  
AOTVOKIR3DS3\*03v1 : ----- : -

\* 2220 \* 2240 \* 2260 \* 2280 \* 2300  
BAC\_clone\_Om : GTTCCCAGTCCCCACCAGGAACAGGGTGTGTGGACACTGCTGCCCGCCTTACTCATCAGTTCATACCTCCTGCCAGGGATTCCAGTTTGTCTCTAAA : 2298  
AOTVOKIR3DL1\*01 : ----- : -  
AOTVOKIR2DL1\*01v1 : ----- : -  
AOTVOKIR3DS1\*01v2 : ----- : -  
AOTVOKIR3DS1\*02 : ----- : -  
AOTVOKIR3DL2\*01 : ----- : -  
AOTVOKIR3DL2\*01v1 : ----- : -  
AOTVOKIR3DL2\*02 : ----- : -  
AOTVOKIR3DS3\*01 : ----- : -  
AOTVOKIR3DS3\*02 : ----- : -  
AOTVOKIR3DS3\*03 : ----- : -  
AOTVOKIR3DS3\*03v1 : ----- : -

\* 2320 \* 2340 \* 2360 \* 2380 \* 2400  
BAC\_clone\_Om : CACATTGAACCAGGCTGTTTCAGATCCTGGACGTGCAGCCTGTCGTGGCTCCTCTTCCACCCTCACATGGACAGGAAGAAACAGATTAGTGGGAAAC : 2394  
AOTVOKIR3DL1\*01 : ----- : -  
AOTVOKIR2DL1\*01v1 : ----- : -  
AOTVOKIR3DS1\*01v2 : ----- : -  
AOTVOKIR3DS1\*02 : ----- : -  
AOTVOKIR3DL2\*01 : ----- : -



```

AOTVOKIR3DL2*01v1 : ----- : -
AOTVOKIR3DL2*02   : ----- : -
AOTVOKIR3DS3*01   : ----- : -
AOTVOKIR3DS3*02   : ----- : -
AOTVOKIR3DS3*03   : ----- : -
AOTVOKIR3DS3*03v1 : ----- : -

```

```

                *      2420          *      2440          *      2460          *      2480          *
BAC_clone_Om      : AGAAACAGCTCAAGGGATGAGGCTGAGCCCAGTGGGAAGGGAGTCAGGGGCTGCTAGAGATGGAGACAGAGAAGAGGGAGGGGGACAGATGGAGGG : 2490
AOTVOKIR3DL1*01   : ----- : -
AOTVOKIR2DL1*01v1 : ----- : -
AOTVOKIR3DS1*01v2 : ----- : -
AOTVOKIR3DS1*02   : ----- : -
AOTVOKIR3DL2*01   : ----- : -
AOTVOKIR3DL2*01v1 : ----- : -
AOTVOKIR3DL2*02   : ----- : -
AOTVOKIR3DS3*01   : ----- : -
AOTVOKIR3DS3*02   : ----- : -
AOTVOKIR3DS3*03   : ----- : -
AOTVOKIR3DS3*03v1 : ----- : -

```

```

                2500          *      2520          *      2540          *      2560          *      2580          *
BAC_clone_Om      : ACCTGCACCAGGGGTGACGGGCACAGAAAGGGGCACGGAGACACAGAGAGGGAGGAGAGATCAGACACCGGGGAGGGGAAGCCTCACTCATTCCA : 2586
AOTVOKIR3DL1*01   : ----- : -
AOTVOKIR2DL1*01v1 : ----- : -
AOTVOKIR3DS1*01v2 : ----- : -
AOTVOKIR3DS1*02   : ----- : -
AOTVOKIR3DL2*01   : ----- : -
AOTVOKIR3DL2*01v1 : ----- : -
AOTVOKIR3DL2*02   : ----- : -
AOTVOKIR3DS3*01   : ----- : -
AOTVOKIR3DS3*02   : ----- : -
AOTVOKIR3DS3*03   : ----- : -
AOTVOKIR3DS3*03v1 : ----- : -

```

```

                2600          *      2620          *      2640          *      2660          *      2680
BAC_clone_Om      : GGTCCCATGGATGGGATGAGAAAGGGAGATGCCTTCTGAACTCACAATCTCGTTTCTTAGGACTCCACAGAAAACCTTCCCTTCTGGCCCTCCCAG : 2682
AOTVOKIR3DL1*01   : ----- : -
AOTVOKIR2DL1*01v1 : ----- : -
AOTVOKIR3DS1*01v2 : ----- : -
AOTVOKIR3DS1*02   : ----- : -
AOTVOKIR3DL2*01   : ----- : -
AOTVOKIR3DL2*01v1 : ----- : -

```

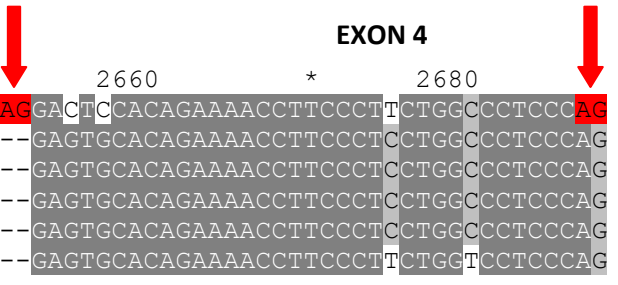

EXON 4

AOTVOKIR3DL2\*02 : -----GAGTGCACAGAAAACCTTCCCTTCTGGTCTCTCCCAG : 388  
 AOTVOKIR3DS3\*01 : -----GAGTGCACAGAAAACCTTCCCTCCTGGCCCTCCCA : 352  
 AOTVOKIR3DS3\*02 : -----GAGTGCACAGAAAACCTTCCCTCCTGGCCCTCCCA : 352  
 AOTVOKIR3DS3\*03 : -----GAGTGCACAGAAAACCTTCCCTCCTGGCCCTCCCA : 370  
 AOTVOKIR3DS3\*03v1 : -----GAGTGCACAGAAAACCTTCCCTCCTGGCCCTCCCA : 370  
 gagtgcacagaaaaccttccct ctgg cctccca

\* 2700 \* 2720 \* 2740 \* 2760 \* 2780  
 BAC\_clone\_Om : CTCCCCTGGTGACATCAGGAAAGACGGTCATCCTGCAATGTTGGTCAGATGTCATGTTGAGCACTTCCTTCTGCACAGAGAGGGGATCGCTGAGG : 2778  
 AOTVOKIR3DL1\*01 : GTCCCCTGGTGAAATCAGGAGAGATGGTCATCCTGCAATGCTGGTCAGATGTCATGTTGAGCACTTCCTTCTGCACAGAGAGGGGATCACTGAGG : 484  
 AOTVOKIR2DL1\*01v1 : GTCCCCTGGTGAAATCAGGAGAGATGGTCATCCTGCAATGCTGGTCAGATGTCATGTTGAGCACTTCCTTCTGCACAGAGAGGGGATCACTGAGG : 484  
 AOTVOKIR3DS1\*01v2 : GTCCCCTGGTGAAATCAGGAGAGATGGTCATCCTGCAATGCTGGTCAGATGTCATGTTGAGCACTTCCTTCTGCACAGAGAGGGGATCACTGAGG : 484  
 AOTVOKIR3DS1\*02 : GTCCCCTGGTGAAATCAGGAGAGATGGTCATCCTGCAATGCTGGTCAGATGTCATGTTGAGCACTTCCTTCTGCACAGAGAGGGGATCACTGAGG : 484  
 AOTVOKIR3DL2\*01 : GTCCCCTGGTGAAATCAGGAGAGATGGTCATCCTGCAATGCTGGTCAGATGTCATGTTGAGCACTTCCTTCTGCACAGAGAGGGGATCACTGAGG : 484  
 AOTVOKIR3DL2\*01v1 : GTCCCCTGGTGAAATCAGGAGAGATGGTCATCCTGCAATGCTGGTCAGATGTCATGTTGAGCACTTCCTTCTGCACAGAGAGGGGATCACTGAGG : 448  
 AOTVOKIR3DL2\*02 : GTCCCCTGGTGAAATCAGGAGAGATGGTCATCCTGCAATGCTGGTCAGATGTCATGTTGAGCACTTCCTTCTGCACAGAGAGGGGATCACTGAGG : 484  
 AOTVOKIR3DS3\*01 : GTCCCCTGGTGAAATTGGAAAGAGATGGTCATCCTGCAATGCTGGTCAGATGTCATGTTGAGCACTTCCTTCTGCACAGAGAGGGGATGGCTGAGG : 448  
 AOTVOKIR3DS3\*02 : GTCCCCTGGTGAAATTGGAAAGAGATGGTCATCCTGCAATGCTGGTCAGATGTCATGTTGAGCACTTCCTTCTGCACAGAGAGGGGATGGCTGAGG : 448  
 AOTVOKIR3DS3\*03 : GTCCCCTGGTGAAATTGGAAAGAGATGGTCATCCTGCAATGCTGGTCAGATGTCATGTTGAGCACTTCCTTCTGCACAGAGAGGGGATGGCTGAGG : 466  
 AOTVOKIR3DS3\*03v1 : GTCCCCTGGTGAAATTGGAAAGAGATGGTCATCCTGCAATGCTGGTCAGATGTCATGTTGAGCACTTCCTTCTGCACAGAGAGGGGATGGCTGAGG : 466  
 gTCCCCTGGTGAAAT G AgAGAtGGTCATCCTGCAATGcTGGTCAGATGTCATGT TGAGCACTTCCTTCTGCACAGAGAGGGGAT CTGAGG

\* 2800 \* 2820 \* 2840 \* 2860 \* 2880  
 BAC\_clone\_Om : CCTCCTGGAGCCTCGTTGGAGAGCCCCATGGTGGCGGCTCCCAGGCCAATTCTCCATAGGTCCCATGACAACCTCACCTTGCAGGGACCTACAGAT : 2874  
 AOTVOKIR3DL1\*01 : CCTCCTGGAGCCTCGTTGGAGAGCCCCGTGATGGTGGCTCCCAGGCCAATTCTCCATGGAACCCATGACGCCTGCCCTTGCAGGGACCTACAGAT : 580  
 AOTVOKIR2DL1\*01v1 : CCTCCTGGAGCCTCGTTGGAGAGCCCCGTGATGGTGGCTCCCAGGCCAATTCTCCATGGAACCCATGACGCCTGCCCTTGCAGGGACCTACAGAT : 580  
 AOTVOKIR3DS1\*01v2 : CCTCCTGGAGCCTCGTTGGAGAGCCCCGTGATGGTGGCTCCCAGGCCAATTCTCCATGGAACCCATGACGCCTGCCCTTGCAGGGACCTACAGAT : 580  
 AOTVOKIR3DS1\*02 : CCTCCTGGAGCCTCGTTGGAGAGCCCCGTGATGGTGGCTCCCAGGCCAATTCTCCATGGAACCCATGACGCCTGCCCTTGCAGGGACCTACAGAT : 580  
 AOTVOKIR3DL2\*01 : CCTCCTGGAGCCTCGTTGGAGAGCCCCGTGATGGTGGCTCCCAGGTC AATTCTCCATGGAACCCATGACACCTGCCCTTGCAGGGACCTACAGAT : 580  
 AOTVOKIR3DL2\*01v1 : CCTCCTGGAGCCTCGTTGGAGAGCCCCGTGATGGTGGCTCCCAGGTC AATTCTCCATGGAACCCATGACACCTGCCCTTGCAGGGACCTACAGAT : 544  
 AOTVOKIR3DL2\*02 : CCTCCTGGAGCCTCGTTGGAGAGCCCCGTGATGGTGGCTCCCAGGTC AATTCTCCATGGAACCCATGACACCTGCCCTTGCAGGGACCTACAGAT : 580  
 AOTVOKIR3DS3\*01 : CCTCCTGGAGCCTCGTTGGAGAGCCCCGTGGTGGCGGCTCCCAGGCCAATTCTCCATAGGTCCCATGCTGCCCTTGCAGGGACCTACAGAT : 544  
 AOTVOKIR3DS3\*02 : CCTCCTGGAGCCTCGTTGGAGAGCCCCGTGGTGGCGGCTCCCAGGCCAATTCTCCATAGGTCCCATGCTGCCCTTGCAGGGACCTACAGAT : 544  
 AOTVOKIR3DS3\*03 : CCTCCTGGAGCCTCGTTGGAGAGCCCCGTGGTGGCGGCTCCCAGGCCAATTCTCCATAGGTCCCATGCTGCCCTTGCAGGGACCTACAGAT : 562  
 AOTVOKIR3DS3\*03v1 : CCTCCTGGAGCCTCGTTGGAGAGCCCCGTGGTGGCGGCTCCCAGGCCAATTCTCCATAGGTCCCATGCTGCCCTTGCAGGGACCTACAGAT : 562  
 CCTCCTGGAGCCTCGTTGGAGAGCCCCgTG TGG GGCTCCCAGG CAA TTCTCCAT G CCCATG cCTGcCCTTGCAGGGACCTACAGAT

\* 2900 \* 2920 \* 2940 \* 2960 \*  
 BAC\_clone\_Om : GCTACGGTTCTGTTACTGACTCTCTCTATGAGTGGTCCGGCTCCCAGTGACCCCCCTGGACATCGTGATCACAGCTGACAGTATCCAGATATTCTTCT : 2970  
 AOTVOKIR3DL1\*01 : GCTACGGTTCTGTTACTGACTCTCTCTATGAGTGGTCCGGCTCCCAGTGACCCCCCTGGACATCGTGATCACAG----- : 652  
 AOTVOKIR2DL1\*01v1 : GCTACGGTTCTGTTACTGACTCTCTCTATGAGTGGTCCGGCTCCCAGTGACCCCCCTGGACATCGTGATCACAG----- : 652  
 AOTVOKIR3DS1\*01v2 : GCTACGGTTCTGTTACTGACTCTCTCTATGAGTGGTCCGGCTCCCAGTGACCCCCCTGGACATCGTGATCACAG----- : 652  
 AOTVOKIR3DS1\*02 : GCTACGGTTCTGTTACTGACTCTCTCTATGAGTGGTCCGGCTCCCAGTGACCCCCCTGGACATCGTGATCACAG----- : 652  
 AOTVOKIR3DL2\*01 : GCTACGGTTCTGTTACTGACTCTCTCTATGAGTGGTCCGGCTCCCAGTGACCCCCCTGGACATCGTGATCACAG----- : 652  
 AOTVOKIR3DL2\*01v1 : GCTACGGTTCTGTTACTGACTCTCTCTATGAGTGGTCCGGCTCCCAGTGACCCCCCTGGACATCGTGATCACAG----- : 616  
 AOTVOKIR3DL2\*02 : GCTACGGTTCTGTTACTGACTCTCTCTATGAGTGGTCCGGCTCCCAGTGACCCCCCTGGACATCGTGATCACAG----- : 652

```

AOTVOKIR3DS3*01 : GCTACGGTTCTGTTACTGACTCTCTCTATGAGTGGTCGGCTCCCAGTGACCCCCTGGACATCGTGATCACAG----- : 616
AOTVOKIR3DS3*02 : GCTACGGTTCTGTTACTGACTCTCTCTATGAGTGGTCGGCTCCCAGTGACCCCCTGGACATCGTGATCACAG----- : 616
AOTVOKIR3DS3*03 : GCTACGGTTCTGTTACTGACTCTCTCTATGAGTGGTCGGCTCCCAGTGACCCCCTGGACATCGTGATCACAG----- : 634
AOTVOKIR3DS3*03v1 : GCTACGGTTCTGTTACTGACTCTCTCTATGAGTGGTCGGCTCCCAGTGACCCCCTGGACATCGTGATCACAG----- : 634
GCTACGGTTCTGTTACTGACTCTCTCTATGAGTGGTCGGCTCCCAGTGACCCCCTGGACATCGTGATCACAG

```

```

                2980          *          3000          *          3020          *          3040          *          3060          *
BAC_clone_Om   : CATTGTCAATAGGACACAGAGTGAATGATCCAGGACTTGGAAAGCCCCAGGTGCTCATGAGGAAGATGAGCGTGGGGTTCTTATGGAGAGAGACTGA : 3066
AOTVOKIR3DL1*01 : ----- : -
AOTVOKIR2DL1*01v1 : ----- : -
AOTVOKIR3DS1*01v2 : ----- : -
AOTVOKIR3DS1*02 : ----- : -
AOTVOKIR3DL2*01 : ----- : -
AOTVOKIR3DL2*01v1 : ----- : -
AOTVOKIR3DL2*02 : ----- : -
AOTVOKIR3DS3*01 : ----- : -
AOTVOKIR3DS3*02 : ----- : -
AOTVOKIR3DS3*03 : ----- : -
AOTVOKIR3DS3*03v1 : ----- : -

```

```

                3080          *          3100          *          3120          *          3140          *          3160
BAC_clone_Om   : CTTGGTGAGGTCTGTACCCGCAGACACAGAGAAACAGGAGACACAAGTCCAGACCACACGTCATAACAGAGGACAGACACAGGGGCCATACAGGGA : 3162
AOTVOKIR3DL1*01 : ----- : -
AOTVOKIR2DL1*01v1 : ----- : -
AOTVOKIR3DS1*01v2 : ----- : -
AOTVOKIR3DS1*02 : ----- : -
AOTVOKIR3DL2*01 : ----- : -
AOTVOKIR3DL2*01v1 : ----- : -
AOTVOKIR3DL2*02 : ----- : -
AOTVOKIR3DS3*01 : ----- : -
AOTVOKIR3DS3*02 : ----- : -
AOTVOKIR3DS3*03 : ----- : -
AOTVOKIR3DS3*03v1 : ----- : -

```

```

                *          3180          *          3200          *          3220          *          3240          *          3260
BAC_clone_Om   : GTGAGAAAAGAGGGAAGGAGGTAGAGGGGACACACAGACAGACAGACATGTCCCAGAGAGAGGTGTCCTTCCATGCTGGCTTTGTTTCAGACACCTG : 3258
AOTVOKIR3DL1*01 : ----- : -
AOTVOKIR2DL1*01v1 : ----- : -
AOTVOKIR3DS1*01v2 : ----- : -
AOTVOKIR3DS1*02 : ----- : -
AOTVOKIR3DL2*01 : ----- : -
AOTVOKIR3DL2*01v1 : ----- : -
AOTVOKIR3DL2*02 : ----- : -
AOTVOKIR3DS3*01 : ----- : -

```

AOTVOKIR3DS3\*02 : ----- : -  
AOTVOKIR3DS3\*03 : ----- : -  
AOTVOKIR3DS3\*03v1 : ----- : -

                  \*      3280                  \*      3300                  \*      3320                  \*      3340                  \*      3360  
BAC\_clone\_Om      : GCACAGGGTAGAAGTTTTATTTCTGCATTACCTCCACAAAGTGTTCTGTACCAGGAGAATCCAAAGAAACACACATTTCTGGCCTGAGTTGGACCC : 3354  
AOTVOKIR3DL1\*01   : ----- : -  
AOTVOKIR2DL1\*01v1 : ----- : -  
AOTVOKIR3DS1\*01v2 : ----- : -  
AOTVOKIR3DS1\*02   : ----- : -  
AOTVOKIR3DL2\*01   : ----- : -  
AOTVOKIR3DL2\*01v1 : ----- : -  
AOTVOKIR3DL2\*02   : ----- : -  
AOTVOKIR3DS3\*01   : ----- : -  
AOTVOKIR3DS3\*02   : ----- : -  
AOTVOKIR3DS3\*03   : ----- : -  
AOTVOKIR3DS3\*03v1 : ----- : -

                  \*      3380                  \*      3400                  \*      3420                  \*      3440                  \*  
BAC\_clone\_Om      : TGTGGCCTCAGGCCTTGTGGCACCTACAGATGCCGTGTTTCATTATGACACCTCTGCCTTCCGTGCAGTGGAGCCTTAATCGTCCCAGGATATCATG : 3450  
AOTVOKIR3DL1\*01   : ----- : -  
AOTVOKIR2DL1\*01v1 : ----- : -  
AOTVOKIR3DS1\*01v2 : ----- : -  
AOTVOKIR3DS1\*02   : ----- : -  
AOTVOKIR3DL2\*01   : ----- : -  
AOTVOKIR3DL2\*01v1 : ----- : -  
AOTVOKIR3DL2\*02   : ----- : -  
AOTVOKIR3DS3\*01   : ----- : -  
AOTVOKIR3DS3\*02   : ----- : -  
AOTVOKIR3DS3\*03   : ----- : -  
AOTVOKIR3DS3\*03v1 : ----- : -

                  3460                  \*      3480                  \*      3500                  \*      3520                  \*      3540                  \*  
BAC\_clone\_Om      : GACCCAGAACACCAACCCCTGTGTGCTGTGTGTATTTGGGGTCACCAGATTGGATTCTGAGGCTCATATTCCAATAATCTCACATATTGTGGCAT : 3546  
AOTVOKIR3DL1\*01   : ----- : -  
AOTVOKIR2DL1\*01v1 : ----- : -  
AOTVOKIR3DS1\*01v2 : ----- : -  
AOTVOKIR3DS1\*02   : ----- : -  
AOTVOKIR3DL2\*01   : ----- : -  
AOTVOKIR3DL2\*01v1 : ----- : -  
AOTVOKIR3DL2\*02   : ----- : -  
AOTVOKIR3DS3\*01   : ----- : -  
AOTVOKIR3DS3\*02   : ----- : -

```

AOTVOKIR3DS3*03      : ----- : -
AOTVOKIR3DS3*03v1   : ----- : -

          3560      *      3580      *      3600      *      3620      *      3640
BAC_clone_Om         : TACTGAGAGACACAGAGAGAAATCAGGGACATCAAAATGCAAAGACATAAACACACACAGAATGAGTCAGGGGAAGGGGATTGAGGGACTCACAGA : 3642
AOTVOKIR3DL1*01      : ----- : -
AOTVOKIR2DL1*01v1    : ----- : -
AOTVOKIR3DS1*01v2    : ----- : -
AOTVOKIR3DS1*02      : ----- : -
AOTVOKIR3DL2*01      : ----- : -
AOTVOKIR3DL2*01v1    : ----- : -
AOTVOKIR3DL2*02      : ----- : -
AOTVOKIR3DS3*01      : ----- : -
AOTVOKIR3DS3*02      : ----- : -
AOTVOKIR3DS3*03      : ----- : -
AOTVOKIR3DS3*03v1    : ----- : -

          *      3660      *      3680      *      3700      *      3720      *      3740
BAC_clone_Om         : CACATAAAGAGAGAGAGAAAAGAGGGCAGAGAAGTGCAGGGAATGATGGACAGGAGCAGAGAAAAGCACTAAAATCAGGGCCCTGAGGGAGGGGCACA : 3738
AOTVOKIR3DL1*01      : ----- : -
AOTVOKIR2DL1*01v1    : ----- : -
AOTVOKIR3DS1*01v2    : ----- : -
AOTVOKIR3DS1*02      : ----- : -
AOTVOKIR3DL2*01      : ----- : -
AOTVOKIR3DL2*01v1    : ----- : -
AOTVOKIR3DL2*02      : ----- : -
AOTVOKIR3DS3*01      : ----- : -
AOTVOKIR3DS3*02      : ----- : -
AOTVOKIR3DS3*03      : ----- : -
AOTVOKIR3DS3*03v1    : ----- : -

          *      3760      *      3780      *      3800      *      3820      *      3840
BAC_clone_Om         : GGGAGAGAGAAAGATGGGGATGTGGGATGGATTGCAGAGATTCCAAAGAGAAGTAGAGAGACGAGAGGCAGAGAAAAGACAAGGAGGTGGAGACACA : 3834
AOTVOKIR3DL1*01      : ----- : -
AOTVOKIR2DL1*01v1    : ----- : -
AOTVOKIR3DS1*01v2    : ----- : -
AOTVOKIR3DS1*02      : ----- : -
AOTVOKIR3DL2*01      : ----- : -
AOTVOKIR3DL2*01v1    : ----- : -
AOTVOKIR3DL2*02      : ----- : -
AOTVOKIR3DS3*01      : ----- : -
AOTVOKIR3DS3*02      : ----- : -
AOTVOKIR3DS3*03      : ----- : -

```

```

AOTVOKIR3DS3*03v1 : ----- : -

                *      3860      *      3880      *      3900      *      3920      *
BAC_clone_Om      : GATGACAGATGGAGAGATACAGATAGATAGATGATAAATAGGTAGATGGTAGATCATAGAGAGGTTATAGATACATGATGATTGACAGATGATACA : 3930
AOTVOKIR3DL1*01   : ----- : -
AOTVOKIR2DL1*01v1 : ----- : -
AOTVOKIR3DS1*01v2 : ----- : -
AOTVOKIR3DS1*02   : ----- : -
AOTVOKIR3DL2*01   : ----- : -
AOTVOKIR3DL2*01v1 : ----- : -
AOTVOKIR3DL2*02   : ----- : -
AOTVOKIR3DS3*01   : ----- : -
AOTVOKIR3DS3*02   : ----- : -
AOTVOKIR3DS3*03   : ----- : -
AOTVOKIR3DS3*03v1 : ----- : -

                3940      *      3960      *      3980      *      4000      *      4020      *
BAC_clone_Om      : CAGGGATGATGATGATTATGATGATAGATGATACAAAGGTAGAGAGGTAGACAGAGAGATAATAGAGTGATAGATAATGCACCGATATAGATAATA : 4026
AOTVOKIR3DL1*01   : ----- : -
AOTVOKIR2DL1*01v1 : ----- : -
AOTVOKIR3DS1*01v2 : ----- : -
AOTVOKIR3DS1*02   : ----- : -
AOTVOKIR3DL2*01   : ----- : -
AOTVOKIR3DL2*01v1 : ----- : -
AOTVOKIR3DL2*02   : ----- : -
AOTVOKIR3DS3*01   : ----- : -
AOTVOKIR3DS3*02   : ----- : -
AOTVOKIR3DS3*03   : ----- : -
AOTVOKIR3DS3*03v1 : ----- : -

                4040      *      4060      *      4080      *      4100      *      4120
BAC_clone_Om      : GATAGACAACCTGTGGATGGAACCAAATAGATAGATAGATCAATAGATAATAGATAGAAATATGCAGTTATGAACTGGACAGTGAGAGACTGAGAA : 4122
AOTVOKIR3DL1*01   : ----- : -
AOTVOKIR2DL1*01v1 : ----- : -
AOTVOKIR3DS1*01v2 : ----- : -
AOTVOKIR3DS1*02   : ----- : -
AOTVOKIR3DL2*01   : ----- : -
AOTVOKIR3DL2*01v1 : ----- : -
AOTVOKIR3DL2*02   : ----- : -
AOTVOKIR3DS3*01   : ----- : -
AOTVOKIR3DS3*02   : ----- : -
AOTVOKIR3DS3*03   : ----- : -
AOTVOKIR3DS3*03v1 : ----- : -

```

```

*      4140      *      4160      *      4180      *      4200      *      4220
BAC_clone_Om : TTAAAGAAAAAGGAAGATCAAGTCAACCAATTCAAGGAGGGTCAGAGAGAATAAAACAAAAATGGAAAACATACCCGGGGTGGGGAAGTGAGTGGA : 4218
AOTVOKIR3DL1*01 : ----- : -
AOTVOKIR2DL1*01v1 : ----- : -
AOTVOKIR3DS1*01v2 : ----- : -
AOTVOKIR3DS1*02 : ----- : -
AOTVOKIR3DL2*01 : ----- : -
AOTVOKIR3DL2*01v1 : ----- : -
AOTVOKIR3DL2*02 : ----- : -
AOTVOKIR3DS3*01 : ----- : -
AOTVOKIR3DS3*02 : ----- : -
AOTVOKIR3DS3*03 : ----- : -
AOTVOKIR3DS3*03v1 : ----- : -

```

```

*      4240      *      4260      *      4280      *      4300      *      4320
BAC_clone_Om : GAGACAGGGAAGGTAGAAAGGAGAAAACAGACAGAAGAGAGACGGGGTGGAGGGTAAGAGAGAGCATCAGCTCATGGAGCAGGGGAGTGAGTTCTCA : 4314
AOTVOKIR3DL1*01 : ----- : -
AOTVOKIR2DL1*01v1 : ----- : -
AOTVOKIR3DS1*01v2 : ----- : -
AOTVOKIR3DS1*02 : ----- : -
AOTVOKIR3DL2*01 : ----- : -
AOTVOKIR3DL2*01v1 : ----- : -
AOTVOKIR3DL2*02 : ----- : -
AOTVOKIR3DS3*01 : ----- : -
AOTVOKIR3DS3*02 : ----- : -
AOTVOKIR3DS3*03 : ----- : -
AOTVOKIR3DS3*03v1 : ----- : -

```

**EXON 5**

```

*      4340      *      4360      *      4380      *      4400      *
BAC_clone_Om : GCTCAGCTGTGAAGGGAGCTGTGACAAGGAAGAGCCTCCTGAGCAAACCTGCCTCTTCTCCTTCCAGGTCTATATGAGAAACCTTCTCTCTCAGCCC : 4410
AOTVOKIR3DL1*01 : -----GTCTATATGAGAAACCTTCTCTCTCAGCCC : 682
AOTVOKIR2DL1*01v1 : -----GTCTATATGAGAAACCTTCTCTCTCAGCCC : -
AOTVOKIR3DS1*01v2 : -----GTCTATATGAGAAACCTTCTCTCTCAGCCC : 682
AOTVOKIR3DS1*02 : -----GTCTATATGAGAAACCTTCTCTCTCAGCCC : 682
AOTVOKIR3DL2*01 : -----GTCTATATGACAAACCTTCGCTCTCAGCCC : 682
AOTVOKIR3DL2*01v1 : -----GTCTATATGACAAACCTTCGCTCTCAGCCC : 646
AOTVOKIR3DL2*02 : -----GTCTATATGACAAACCTTCGCTCTCAGCCC : 682
AOTVOKIR3DS3*01 : -----GTCTATATGAGAAACCTTCTCTCTCAGCCC : 646
AOTVOKIR3DS3*02 : -----GTCTATATGAGAAACCTTCTCTCTCAGCCC : 646
AOTVOKIR3DS3*03 : -----GTCTATATGAGAAACCTTCTCTCTCAGCCC : 664
AOTVOKIR3DS3*03v1 : -----GTCTATATGAGAAACCTTCTCTCTCAGCCC : 664

```

gtctatatga aa ccttc ctctcagccc

EXON 5

|                   |      |         |          |        |           |            |              |           |            |            |             |         |   |      |
|-------------------|------|---------|----------|--------|-----------|------------|--------------|-----------|------------|------------|-------------|---------|---|------|
|                   | 4420 | *       | 4440     | *      | 4460      | *          | 4480         | *         | 4500       | *          |             |         |   |      |
| BAC_clone_Om      | :    | AGCCGGG | CCCTACGG | TTCAGG | CAGGAGAGA | AATGTGACCT | TGTCCTGCAGCT | CCCGGAGCT | GGTTCGACAT | GTACCATCTA | ACTTAGGGAGG | GGGGAGG | : | 4506 |
| AOTVOKIR3DL1*01   | :    | AGCCGGG | CCCCACGG | TTCAGG | CAGGAGAGA | AATGTGACCT | TGTCCTGCAGCT | CCCGGAGCT | GGTTCGACAT | GTACCATCTA | ACTTAGGGAGG | GGGGAGG | : | 778  |
| AOTVOKIR2DL1*01v1 | :    | -----   |          |        |           |            |              |           |            |            |             | :       | - |      |
| AOTVOKIR3DS1*01v2 | :    | AGCCGGG | CCCCACGG | TTCAGG | CAGGAGAGA | AATGTGACCT | TGTCCTGCAGCT | CCCGGAGCT | GGTTCGACAT | GTACCATCTA | ACTTAGGGAGG | GGGGAGG | : | 778  |
| AOTVOKIR3DS1*02   | :    | AGCCGGG | CCCCACGG | TTCAGG | CAGGAGAGA | AATGTGACCT | TGTCCTGCAGCT | CCCGGAGCT | GGTTCGACAT | GTACCATCTA | ACTTAGGGAGG | GGGGAGG | : | 778  |
| AOTVOKIR3DL2*01   | :    | AGCCGGG | CCCCACGG | TTCAGG | CAGGAGAGA | AACGTGACCT | TGTCCTGCAGCT | CCCGGAGCT | GGTTCGACAT | GTACCATCTA | ACTTAGGGAGG | GGGGAGG | : | 778  |
| AOTVOKIR3DL2*01v1 | :    | AGCCGGG | CCCCACGG | TTCAGG | CAGGAGAGA | AACGTGACCT | TGTCCTGCAGCT | CCCGGAGCT | GGTTCGACAT | GTACCATCTA | ACTTAGGGAGG | GGGGAGG | : | 742  |
| AOTVOKIR3DL2*02   | :    | AGCCGGG | CCCCACGG | TTCAGG | CAGGAGAGA | AACGTGACCT | TGTCCTGCAGCT | CCCGGAGCT | GGTTCGACAT | GTACCATCTA | ACTTAGGGAGG | GGGGAGG | : | 778  |
| AOTVOKIR3DS3*01   | :    | AGCTGGG | CCCCACGG | TTCAGG | CAGGAGAGA | AACGTGACCT | TGTCCTGCAGCT | CCCGGAGCT | GGTTCGACAT | GTACCATCTA | ACTTAGGGAGG | GGGGAGG | : | 742  |
| AOTVOKIR3DS3*02   | :    | AGCTGGG | CCCCACGG | TTCAGG | CAGGAGAGA | AACGTGACCT | TGTCCTGCAGCT | CCCGGAGCT | GGTTCGACAT | GTACCATCTA | ACTTAGGGAGG | GGGGAGG | : | 742  |
| AOTVOKIR3DS3*03   | :    | AGCTGGG | CCCCACGG | TTCAGG | CAGGAGAGA | AACGTGACCT | TGTCCTGCAGCT | CCCGGAGCT | GGTTCGACAT | GTACCATCTA | ACTTAGGGAGG | GGGGAGG | : | 760  |
| AOTVOKIR3DS3*03v1 | :    | AGCTGGG | CCCCACGG | TTCAGG | CAGGAGAGA | AACGTGACCT | TGTCCTGCAGCT | CCCGGAGCT | GGTTCGACAT | GTACCATCTA | ACTTAGGGAGG | GGGGAGG | : | 760  |

agc gg cccacg ttcag caggagagaa gtgaccttgcctgcagctcc ggagctggttcgacatgtaccatctaac agggag gggagg

|                   |      |            |                 |             |          |                          |               |            |             |   |      |   |   |
|-------------------|------|------------|-----------------|-------------|----------|--------------------------|---------------|------------|-------------|---|------|---|---|
|                   | 4520 | *          | 4540            | *           | 4560     | *                        | 4580          | *          | 4600        |   |      |   |   |
| BAC_clone_Om      | :    | CCCCTGAACT | CAGGCTCCCTGCAGT | GCCCAGCATCA | ATGGAACA | ATTCCAGGCCCACTTCCCTCTGGG | CCCTGCCACCCAC | GGAGGGT    | TCCCTACAGAT | : | 4602 |   |   |
| AOTVOKIR3DL1*01   | :    | CCCCTGAACT | CAGGCTCCCTGCAGT | GCCCAGCATCA | ATGGAACA | ATTCCAGGCCCACTTCCCTCTGGG | CCCTGCCACCCAC | GGAGGGACCT | TACAGAT     | : | 874  |   |   |
| AOTVOKIR2DL1*01v1 | :    | -----      |                 |             |          |                          |               |            |             |   |      | : | - |
| AOTVOKIR3DS1*01v2 | :    | CCCCTGAACT | CAGGCTCCCTGCAGT | GCCCAGCATCA | ATGGAACA | ATTCCAGGCCCACTTCCCTCTGGG | CCCTGCCACCCAC | GGAGGGACCT | TACAGAT     | : | 874  |   |   |
| AOTVOKIR3DS1*02   | :    | CCCCTGAACT | CAGGCTCCCTGCAGT | GCCCAGCATCA | ATGGAACA | ATTCCAGGCCCACTTCCCTCTGGG | CCCTGCCACCCAC | GGAGGGACCT | TACAGAT     | : | 874  |   |   |
| AOTVOKIR3DL2*01   | :    | CCCCTGAACT | CAGGCTCACTGCAGT | GCCCAGCATCA | ATGGAACA | ATTCCAGGCCCACTTCCCTCTGGG | CCCTGCCACCCAC | GGAGGGACCT | TACAGAT     | : | 874  |   |   |
| AOTVOKIR3DL2*01v1 | :    | CCCCTGAACT | CAGGCTCACTGCAGT | GCCCAGCATCA | ATGGAACA | ATTCCAGGCCCACTTCCCTCTGGG | CCCTGCCACCCAC | GGAGGGACCT | TACAGAT     | : | 838  |   |   |
| AOTVOKIR3DL2*02   | :    | CCCCTGAACT | CAGGCTCACTGCAGT | GCCCAGCATCA | ATGGAACA | ATTCCAGGCCCACTTCCCTCTGGG | CCCTGCCACCCAC | GGAGGGACCT | TACAGAT     | : | 874  |   |   |
| AOTVOKIR3DS3*01   | :    | CCCCTGAACT | TAGGCTTCCTGCAGT | GCCCAGCATCA | ATGGAACA | TTCCAGGCCCACTTCCCTCTGGG  | CCCTGCCACCCAT | GGAGGGACCT | TACAGAT     | : | 838  |   |   |
| AOTVOKIR3DS3*02   | :    | CCCCTGAACT | TAGGCTTCCTGCAGT | GCCCAGCATCA | ATGGAACA | TTCCAGGCCCACTTCCCTCTGGG  | CCCTGCCACCCAT | GGAGGGACCT | TACAGAT     | : | 838  |   |   |
| AOTVOKIR3DS3*03   | :    | CCCCTGAACT | TAGGCTTCCTGCAGT | GCCCAGCATCA | ATGGAACA | TTCCAGGCCCACTTCCCTCTGGG  | CCCTGCCACCCAT | GGAGGGACCT | TACAGAT     | : | 856  |   |   |
| AOTVOKIR3DS3*03v1 | :    | CCCCTGAACT | TAGGCTTCCTGCAGT | GCCCAGCATCA | ATGGAACA | TTCCAGGCCCACTTCCCTCTGGG  | CCCTGCCACCCAT | GGAGGGACCT | TACAGAT     | : | 856  |   |   |

cccctgaact agg t ctgcagtgcccagcatca tggaaac ttccaggcccacttccctctgggcccctgccaccca ggagggacctacagat

|                   |   |                               |                        |                        |               |               |       |                        |   |      |  |   |   |
|-------------------|---|-------------------------------|------------------------|------------------------|---------------|---------------|-------|------------------------|---|------|--|---|---|
|                   | * | 4620                          | *                      | 4640                   | *             | 4660          | *     | 4680                   | * | 4700 |  |   |   |
| BAC_clone_Om      | : | GCTTCGGCTCTTTCT               | TGTGACTCTCCCTAC        | GAGTGGTCAGCCCCGAGTGACC | CACTGTCC      | CGTTTCTGTACAG | GT    | GAGGAAACCCCATACCTGTCCC | : | 4698 |  |   |   |
| AOTVOKIR3DL1*01   | : | GCTTCGGCTCTTTCCGTGACTCTCCCTAC | GAGTGGTCAGCCCCGAGTGACC | CACTGTCC               | CGTTTCTGTACAG | -----         | ----- | -----                  | : | 946  |  |   |   |
| AOTVOKIR2DL1*01v1 | : | -----                         |                        |                        |               |               |       |                        |   |      |  | : | - |
| AOTVOKIR3DS1*01v2 | : | GCTTCGGCTCTTTCCGTGACTCTCCCTAC | GAGTGGTCAGCCCCGAGTGACC | CACTGTCC               | CGTTTCTGTACAG | -----         | ----- | -----                  | : | 946  |  |   |   |
| AOTVOKIR3DS1*02   | : | GCTTCGGCTCTTTCCGTGACTCTCCCTAC | GAGTGGTCAGCCCCGAGTGACC | CACTGTCC               | CGTTTCTGTACAG | -----         | ----- | -----                  | : | 946  |  |   |   |
| AOTVOKIR3DL2*01   | : | GCTTCAGCTCTTTCCGTGACTCTCCCTAC | GAGTGGTCAGCCCCGAGTGACC | CACTGTCC               | CGTTTCTGTACAG | -----         | ----- | -----                  | : | 946  |  |   |   |
| AOTVOKIR3DL2*01v1 | : | GCTTCAGCTCTTTCCGTGACTCTCCCTAC | GAGTGGTCAGCCCCGAGTGACC | CACTGTCC               | CGTTTCTGTACAG | -----         | ----- | -----                  | : | 910  |  |   |   |
| AOTVOKIR3DL2*02   | : | GCTTCAGCTCTTTCCGTGACTCTCCCTAC | GAGTGGTCAGCCCCGAGTGACC | CACTGTCC               | CGTTTCTGTACAG | -----         | ----- | -----                  | : | 946  |  |   |   |
| AOTVOKIR3DS3*01   | : | GCTTCGGCTCTTTCCGTGACTCTCCCTAT | GAGTGGTCAGCCCCGAGTGACC | AACTGTCT               | TGTTTCTGTACAG | -----         | ----- | -----                  | : | 910  |  |   |   |
| AOTVOKIR3DS3*02   | : | GCTTCGGCTCTTTCCGTGACTCTCCCTAT | GAGTGGTCAGCCCCGAGTGACC | AACTGTCT               | TGTTTCTGTACAG | -----         | ----- | -----                  | : | 910  |  |   |   |
| AOTVOKIR3DS3*03   | : | GCTTCGGCTCTTTCCGTGACTCTCCCTAT | GAGTGGTCAGCCCCGAGTGACC | AACTGTCT               | TGTTTCTGTACAG | -----         | ----- | -----                  | : | 928  |  |   |   |
| AOTVOKIR3DS3*03v1 | : | GCTTCGGCTCTTTCCGTGACTCTCCCTAT | GAGTGGTCAGCCCCGAGTGACC | AACTGTCT               | TGTTTCTGTACAG | -----         | ----- | -----                  | : | 928  |  |   |   |

gcttc gctctttccgtgactctcccta gagtggtcagccccgagtgacc actgtc gtttctgtcacag



```

      *      4720      *      4740      *      4760      *      4780      *      4800
BAC_clone_Om      : ATGTCTGATGATCCCAGAGCCATAGCTGAGGAACTTCCTGCTGATGATGGAGGGAAGCGTGGACAGATGCAGAGAGAAGACGAAGCCTGGGTGTGA : 4794
AOTVOKIR3DL1*01   : ----- : -
AOTVOKIR2DL1*01v1 : ----- : -
AOTVOKIR3DS1*01v2 : ----- : -
AOTVOKIR3DS1*02   : ----- : -
AOTVOKIR3DL2*01   : ----- : -
AOTVOKIR3DL2*01v1 : ----- : -
AOTVOKIR3DL2*02   : ----- : -
AOTVOKIR3DS3*01   : ----- : -
AOTVOKIR3DS3*02   : ----- : -
AOTVOKIR3DS3*03   : ----- : -
AOTVOKIR3DS3*03v1 : ----- : -

```

```

      *      4820      *      4840      *      4860      *      4880      *
BAC_clone_Om      : GGGCGGGGTCAGGGCACAGGATGGCAGACAGGGCACCTCCAGGCCCTCCTCCACGGCCTGCATGGAGGCCCGCGTTCAGGGCTCCGGGCACCCAGG : 4890
AOTVOKIR3DL1*01   : ----- : -
AOTVOKIR2DL1*01v1 : ----- : -
AOTVOKIR3DS1*01v2 : ----- : -
AOTVOKIR3DS1*02   : ----- : -
AOTVOKIR3DL2*01   : ----- : -
AOTVOKIR3DL2*01v1 : ----- : -
AOTVOKIR3DL2*02   : ----- : -
AOTVOKIR3DS3*01   : ----- : -
AOTVOKIR3DS3*02   : ----- : -
AOTVOKIR3DS3*03   : ----- : -
AOTVOKIR3DS3*03v1 : ----- : -

```

```

      4900      *      4920      *      4940      *      4960      *      4980      *
BAC_clone_Om      : CAGATGGAGAAACGGTCAGGACAGGCCCAGAGGAGGGGAGACGGGGCTCAGTTTGGGGAGATCAGAGGTTACCTCAGCCCCCTCAAACCTCACCCATT : 4986
AOTVOKIR3DL1*01   : ----- : -
AOTVOKIR2DL1*01v1 : ----- : -
AOTVOKIR3DS1*01v2 : ----- : -
AOTVOKIR3DS1*02   : ----- : -
AOTVOKIR3DL2*01   : ----- : -
AOTVOKIR3DL2*01v1 : ----- : -
AOTVOKIR3DL2*02   : ----- : -
AOTVOKIR3DS3*01   : ----- : -
AOTVOKIR3DS3*02   : ----- : -
AOTVOKIR3DS3*03   : ----- : -
AOTVOKIR3DS3*03v1 : ----- : -

```

```

      5000      *      5020      *      5040      *      5060      *      5080

```

BAC\_clone\_Om : TCCCAGAAGCCCATCCTGGCCTCTCACCCACAGAGAGATGTCATCATCAGCAACCCCCATGTCCTTTTCTTTTCATTTTCAAAAATATTTACTAAG : 5082  
AOTVOKIR3DL1\*01 : ----- : -  
AOTVOKIR2DL1\*01v1 : ----- : -  
AOTVOKIR3DS1\*01v2 : ----- : -  
AOTVOKIR3DS1\*02 : ----- : -  
AOTVOKIR3DL2\*01 : ----- : -  
AOTVOKIR3DL2\*01v1 : ----- : -  
AOTVOKIR3DL2\*02 : ----- : -  
AOTVOKIR3DS3\*01 : ----- : -  
AOTVOKIR3DS3\*02 : ----- : -  
AOTVOKIR3DS3\*03 : ----- : -  
AOTVOKIR3DS3\*03v1 : ----- : -

\* 5100 \* 5120 \* 5140 \* 5160 \* 5180  
BAC\_clone\_Om : GTTACATAATTTACCACCTGTACCATCATTTTTAAGTGTAAGTCCAGTGGTCATAAATACATTGATAAGGTTGGCGCGGTGGCTCACGCCTGTAA : 5178  
AOTVOKIR3DL1\*01 : ----- : -  
AOTVOKIR2DL1\*01v1 : ----- : -  
AOTVOKIR3DS1\*01v2 : ----- : -  
AOTVOKIR3DS1\*02 : ----- : -  
AOTVOKIR3DL2\*01 : ----- : -  
AOTVOKIR3DL2\*01v1 : ----- : -  
AOTVOKIR3DL2\*02 : ----- : -  
AOTVOKIR3DS3\*01 : ----- : -  
AOTVOKIR3DS3\*02 : ----- : -  
AOTVOKIR3DS3\*03 : ----- : -  
AOTVOKIR3DS3\*03v1 : ----- : -

\* 5200 \* 5220 \* 5240 \* 5260 \* 5280  
BAC\_clone\_Om : TCCCAGCACTTTGAGAGGCCAAGACAGGTGGATCATTTGACATCCGGGGCTCAAACCCTCTCGCCAACATGGGGGAAATCACATCTTTACTAAA : 5274  
AOTVOKIR3DL1\*01 : ----- : -  
AOTVOKIR2DL1\*01v1 : ----- : -  
AOTVOKIR3DS1\*01v2 : ----- : -  
AOTVOKIR3DS1\*02 : ----- : -  
AOTVOKIR3DL2\*01 : ----- : -  
AOTVOKIR3DL2\*01v1 : ----- : -  
AOTVOKIR3DL2\*02 : ----- : -  
AOTVOKIR3DS3\*01 : ----- : -  
AOTVOKIR3DS3\*02 : ----- : -  
AOTVOKIR3DS3\*03 : ----- : -  
AOTVOKIR3DS3\*03v1 : ----- : -

\* 5300 \* 5320 \* 5340 \* 5360 \*  
BAC\_clone\_Om : AATACGAAAAAAAAAATTAACCAGGAATGGTGGCATGTGCCTATAGTCTCAGCTACTTGGGAGGCTGAGGCATGAGAAGTGTGTAAGCCCAGGAGAC : 5370

```

AOTVOKIR3DL1*01 : ----- : -
AOTVOKIR2DL1*01v1 : ----- : -
AOTVOKIR3DS1*01v2 : ----- : -
AOTVOKIR3DS1*02 : ----- : -
AOTVOKIR3DL2*01 : ----- : -
AOTVOKIR3DL2*01v1 : ----- : -
AOTVOKIR3DL2*02 : ----- : -
AOTVOKIR3DS3*01 : ----- : -
AOTVOKIR3DS3*02 : ----- : -
AOTVOKIR3DS3*03 : ----- : -
AOTVOKIR3DS3*03v1 : ----- : -

```

```

                    5380      *      5400      *      5420      *      5440      *      5460      *
BAC_clone_Om      : AGAGGTTACAGTGATCCGAAATCATACCACTGTTCTGTAGCCTGGGTGACAGACAGAGACACTGTCTCAGCAAATAAATAAATAAATATTTTTATA : 5466
AOTVOKIR3DL1*01  : ----- : -
AOTVOKIR2DL1*01v1 : ----- : -
AOTVOKIR3DS1*01v2 : ----- : -
AOTVOKIR3DS1*02  : ----- : -
AOTVOKIR3DL2*01  : ----- : -
AOTVOKIR3DL2*01v1 : ----- : -
AOTVOKIR3DL2*02  : ----- : -
AOTVOKIR3DS3*01  : ----- : -
AOTVOKIR3DS3*02  : ----- : -
AOTVOKIR3DS3*03  : ----- : -
AOTVOKIR3DS3*03v1 : ----- : -

```

```

                    5480      *      5500      *      5520      *      5540      *      5560
BAC_clone_Om      : TTCTTTTTTTTCGTTGTTACCCTCCACCATTCCCTTCCTGGCCTCTGAGAGCCACCATTCTCTCTACCTTCATGAGGTCCACCTGTTAGCTCCTGCA : 5562
AOTVOKIR3DL1*01  : ----- : -
AOTVOKIR2DL1*01v1 : ----- : -
AOTVOKIR3DS1*01v2 : ----- : -
AOTVOKIR3DS1*02  : ----- : -
AOTVOKIR3DL2*01  : ----- : -
AOTVOKIR3DL2*01v1 : ----- : -
AOTVOKIR3DL2*02  : ----- : -
AOTVOKIR3DS3*01  : ----- : -
AOTVOKIR3DS3*02  : ----- : -
AOTVOKIR3DS3*03  : ----- : -
AOTVOKIR3DS3*03v1 : ----- : -

```

```

                    *      5580      *      5600      *      5620      *      5640      *      5660
BAC_clone_Om      : TATGGGTGAGAAATGGCAATCTCTGTAATGCCCTCCAGTTCATCCATGTGTCTGAAAGTGACAGGATGTTATTGCTTTTATGGAGGAGTGGTCTCC : 5658
AOTVOKIR3DL1*01  : ----- : -

```

AOTVOKIR2DL1\*01v1 : ----- : -  
AOTVOKIR3DS1\*01v2 : ----- : -  
AOTVOKIR3DS1\*02 : ----- : -  
AOTVOKIR3DL2\*01 : ----- : -  
AOTVOKIR3DL2\*01v1 : ----- : -  
AOTVOKIR3DL2\*02 : ----- : -  
AOTVOKIR3DS3\*01 : ----- : -  
AOTVOKIR3DS3\*02 : ----- : -  
AOTVOKIR3DS3\*03 : ----- : -  
AOTVOKIR3DS3\*03v1 : ----- : -

BAC\_clone\_Om : \* 5680 \* 5700 \* 5720 \* 5740 \* 5760 : 5754  
AOTVOKIR3DL1\*01 : ----- : -  
AOTVOKIR2DL1\*01v1 : ----- : -  
AOTVOKIR3DS1\*01v2 : ----- : -  
AOTVOKIR3DS1\*02 : ----- : -  
AOTVOKIR3DL2\*01 : ----- : -  
AOTVOKIR3DL2\*01v1 : ----- : -  
AOTVOKIR3DL2\*02 : ----- : -  
AOTVOKIR3DS3\*01 : ----- : -  
AOTVOKIR3DS3\*02 : ----- : -  
AOTVOKIR3DS3\*03 : ----- : -  
AOTVOKIR3DS3\*03v1 : ----- : -

BAC\_clone\_Om : \* 5780 \* 5800 \* 5820 \* 5840 \* : 5850  
AOTVOKIR3DL1\*01 : ----- : -  
AOTVOKIR2DL1\*01v1 : ----- : -  
AOTVOKIR3DS1\*01v2 : ----- : -  
AOTVOKIR3DS1\*02 : ----- : -  
AOTVOKIR3DL2\*01 : ----- : -  
AOTVOKIR3DL2\*01v1 : ----- : -  
AOTVOKIR3DL2\*02 : ----- : -  
AOTVOKIR3DS3\*01 : ----- : -  
AOTVOKIR3DS3\*02 : ----- : -  
AOTVOKIR3DS3\*03 : ----- : -  
AOTVOKIR3DS3\*03v1 : ----- : -

BAC\_clone\_Om : 5860 \* 5880 \* 5900 \* 5920 \* 5940 \* : 5946  
AOTVOKIR3DL1\*01 : ----- : -  
AOTVOKIR2DL1\*01v1 : ----- : -

AOTVOKIR3DS1\*01v2 : ----- : -  
AOTVOKIR3DS1\*02 : ----- : -  
AOTVOKIR3DL2\*01 : ----- : -  
AOTVOKIR3DL2\*01v1 : ----- : -  
AOTVOKIR3DL2\*02 : ----- : -  
AOTVOKIR3DS3\*01 : ----- : -  
AOTVOKIR3DS3\*02 : ----- : -  
AOTVOKIR3DS3\*03 : ----- : -  
AOTVOKIR3DS3\*03v1 : ----- : -

5960 \* 5980 \* 6000 \* 6020 \* 6040  
BAC\_clone\_Om : CTCCATCTCCTGGATTCTGCGATTCTCCTGCCTCAGCCTCCCAAGTAGCTGAGATAACTGGCACCCACCACCATGCGCAGCCAGTTTTATTAGAG : 6042  
AOTVOKIR3DL1\*01 : ----- : -  
AOTVOKIR2DL1\*01v1 : ----- : -  
AOTVOKIR3DS1\*01v2 : ----- : -  
AOTVOKIR3DS1\*02 : ----- : -  
AOTVOKIR3DL2\*01 : ----- : -  
AOTVOKIR3DL2\*01v1 : ----- : -  
AOTVOKIR3DL2\*02 : ----- : -  
AOTVOKIR3DS3\*01 : ----- : -  
AOTVOKIR3DS3\*02 : ----- : -  
AOTVOKIR3DS3\*03 : ----- : -  
AOTVOKIR3DS3\*03v1 : ----- : -

\* 6060 \* 6080 \* 6100 \* 6120 \* 6140  
BAC\_clone\_Om : ACTGGGTTTTGCCATGTTGGCCAGGCTGGTCTCAAACCTCTGACCTCAGGTGATCTACCCACCTTGGCCTCCCAAATTGCTGGGATTACAGGGGTG : 6138  
AOTVOKIR3DL1\*01 : ----- : -  
AOTVOKIR2DL1\*01v1 : ----- : -  
AOTVOKIR3DS1\*01v2 : ----- : -  
AOTVOKIR3DS1\*02 : ----- : -  
AOTVOKIR3DL2\*01 : ----- : -  
AOTVOKIR3DL2\*01v1 : ----- : -  
AOTVOKIR3DL2\*02 : ----- : -  
AOTVOKIR3DS3\*01 : ----- : -  
AOTVOKIR3DS3\*02 : ----- : -  
AOTVOKIR3DS3\*03 : ----- : -  
AOTVOKIR3DS3\*03v1 : ----- : -

\* 6160 \* 6180 \* 6200 \* 6220 \* 6240  
BAC\_clone\_Om : AGCCACGGCTACCGAACGTTTTATTGTATTTATTTATTTTATTTTAAATTTTTTTTTCTGTTCTCCAATTGTGGATAATTTTTCTGAGGCTTCAG : 6234  
AOTVOKIR3DL1\*01 : ----- : -  
AOTVOKIR2DL1\*01v1 : ----- : -  
AOTVOKIR3DS1\*01v2 : ----- : -

AOTVOKIR3DS1\*02 : ----- : -  
AOTVOKIR3DL2\*01 : ----- : -  
AOTVOKIR3DL2\*01v1 : ----- : -  
AOTVOKIR3DL2\*02 : ----- : -  
AOTVOKIR3DS3\*01 : ----- : -  
AOTVOKIR3DS3\*02 : ----- : -  
AOTVOKIR3DS3\*03 : ----- : -  
AOTVOKIR3DS3\*03v1 : ----- : -

                  \*      6260                  \*      6280                  \*      6300                  \*      6320                  \*  
BAC\_clone\_Om : ATAATTCTGTTTATAATTATGTTTCTCTAACTTTGTGCAGAATTACTACAAAGGATATGAACACATAATGTGTCCACCAGGCTTCATTCTCTTTTT : 6330  
AOTVOKIR3DL1\*01 : ----- : -  
AOTVOKIR2DL1\*01v1 : ----- : -  
AOTVOKIR3DS1\*01v2 : ----- : -  
AOTVOKIR3DS1\*02 : ----- : -  
AOTVOKIR3DL2\*01 : ----- : -  
AOTVOKIR3DL2\*01v1 : ----- : -  
AOTVOKIR3DL2\*02 : ----- : -  
AOTVOKIR3DS3\*01 : ----- : -  
AOTVOKIR3DS3\*02 : ----- : -  
AOTVOKIR3DS3\*03 : ----- : -  
AOTVOKIR3DS3\*03v1 : ----- : -

                  6340                  \*      6360                  \*      6380                  \*      6400                  \*      6420                  \*  
BAC\_clone\_Om : TAAAATTAGTTTATTTTATTTAATAATAACAATTAATAATTATTATTATATCAATATATTAATATTATTAATAATATATTATTTTAGAGACGGCATT : 6426  
AOTVOKIR3DL1\*01 : ----- : -  
AOTVOKIR2DL1\*01v1 : ----- : -  
AOTVOKIR3DS1\*01v2 : ----- : -  
AOTVOKIR3DS1\*02 : ----- : -  
AOTVOKIR3DL2\*01 : ----- : -  
AOTVOKIR3DL2\*01v1 : ----- : -  
AOTVOKIR3DL2\*02 : ----- : -  
AOTVOKIR3DS3\*01 : ----- : -  
AOTVOKIR3DS3\*02 : ----- : -  
AOTVOKIR3DS3\*03 : ----- : -  
AOTVOKIR3DS3\*03v1 : ----- : -

                  6440                  \*      6460                  \*      6480                  \*      6500                  \*      6520  
BAC\_clone\_Om : TCTCCATGTTGGTCAGGCTGGTCTTCAACCCCCGACCGCAGGTGATCCACCCGCCTCTGCCTCCCAAAGTGCTGGGACTACAGGCCTGAGCCACCG : 6522  
AOTVOKIR3DL1\*01 : ----- : -  
AOTVOKIR2DL1\*01v1 : ----- : -  
AOTVOKIR3DS1\*01v2 : ----- : -  
AOTVOKIR3DS1\*02 : ----- : -

AOTVOKIR3DL2\*01 : ----- : -  
AOTVOKIR3DL2\*01v1 : ----- : -  
AOTVOKIR3DL2\*02 : ----- : -  
AOTVOKIR3DS3\*01 : ----- : -  
AOTVOKIR3DS3\*02 : ----- : -  
AOTVOKIR3DS3\*03 : ----- : -  
AOTVOKIR3DS3\*03v1 : ----- : -

\* 6540 \* 6560 \* 6580 \* 6600 \* 6620  
BAC\_clone\_Om : CGCCCGCAAACCTTTTTGTTTTTGGAGAACTTACATACTCTTCTCCTTTGTAATGTATGTACTAATTTACATTTCGTATCGACAGTGTACCAGGGT : 6618  
AOTVOKIR3DL1\*01 : ----- : -  
AOTVOKIR2DL1\*01v1 : ----- : -  
AOTVOKIR3DS1\*01v2 : ----- : -  
AOTVOKIR3DS1\*02 : ----- : -  
AOTVOKIR3DL2\*01 : ----- : -  
AOTVOKIR3DL2\*01v1 : ----- : -  
AOTVOKIR3DL2\*02 : ----- : -  
AOTVOKIR3DS3\*01 : ----- : -  
AOTVOKIR3DS3\*02 : ----- : -  
AOTVOKIR3DS3\*03 : ----- : -  
AOTVOKIR3DS3\*03v1 : ----- : -

\* 6640 \* 6660 \* 6680 \* 6700 \* 6720  
BAC\_clone\_Om : CCTCCCTTCTCTACCACCTCGCCAGCATTTCGTTTTGTCTTTTCAGATAAAAGCCAGTGTAAATGCGGCGAGAAGATGGCTCACTGTGATTTTCAGTTTCG : 6714  
AOTVOKIR3DL1\*01 : ----- : -  
AOTVOKIR2DL1\*01v1 : ----- : -  
AOTVOKIR3DS1\*01v2 : ----- : -  
AOTVOKIR3DS1\*02 : ----- : -  
AOTVOKIR3DL2\*01 : ----- : -  
AOTVOKIR3DL2\*01v1 : ----- : -  
AOTVOKIR3DL2\*02 : ----- : -  
AOTVOKIR3DS3\*01 : ----- : -  
AOTVOKIR3DS3\*02 : ----- : -  
AOTVOKIR3DS3\*03 : ----- : -  
AOTVOKIR3DS3\*03v1 : ----- : -

\* 6740 \* 6760 \* 6780 \* 6800 \*  
BAC\_clone\_Om : CATTTCTCTGATGACTACCGATACTGAGCACTTTTTTCATACACGTGTTGGCCATTTGAATGTTTTTTTTTCGCTAAGTGTCTGTTTCAGGTCTTTTCACT : 6810  
AOTVOKIR3DL1\*01 : ----- : -  
AOTVOKIR2DL1\*01v1 : ----- : -  
AOTVOKIR3DS1\*01v2 : ----- : -  
AOTVOKIR3DS1\*02 : ----- : -  
AOTVOKIR3DL2\*01 : ----- : -

AOTVOKIR3DL2\*01v1 : ----- : -  
AOTVOKIR3DL2\*02 : ----- : -  
AOTVOKIR3DS3\*01 : ----- : -  
AOTVOKIR3DS3\*02 : ----- : -  
AOTVOKIR3DS3\*03 : ----- : -  
AOTVOKIR3DS3\*03v1 : ----- : -

6820 \* 6840 \* 6860 \* 6880 \* 6900 \*  
BAC\_clone\_Om : AATTGTTAAAGTAACTGTTTCATTTTCATTGAGCTTTATGTGTACTCTAGCTATTAATCCCCTCTCAGTCACACACTCTGCAAATATTTCCCTCCCAT : 6906  
AOTVOKIR3DL1\*01 : ----- : -  
AOTVOKIR2DL1\*01v1 : ----- : -  
AOTVOKIR3DS1\*01v2 : ----- : -  
AOTVOKIR3DS1\*02 : ----- : -  
AOTVOKIR3DL2\*01 : ----- : -  
AOTVOKIR3DL2\*01v1 : ----- : -  
AOTVOKIR3DL2\*02 : ----- : -  
AOTVOKIR3DS3\*01 : ----- : -  
AOTVOKIR3DS3\*02 : ----- : -  
AOTVOKIR3DS3\*03 : ----- : -  
AOTVOKIR3DS3\*03v1 : ----- : -

6920 \* 6940 \* 6960 \* 6980 \* 7000  
BAC\_clone\_Om : CGTCTGGGTTGTCTCTTCACTTCTTTGGTTGCTTCATTTGAGGTTTCAGAAGCTGCTTAGTTGGATGTAATCCCAATGGTCTATTTTTGTTTTGATT : 7002  
AOTVOKIR3DL1\*01 : ----- : -  
AOTVOKIR2DL1\*01v1 : ----- : -  
AOTVOKIR3DS1\*01v2 : ----- : -  
AOTVOKIR3DS1\*02 : ----- : -  
AOTVOKIR3DL2\*01 : ----- : -  
AOTVOKIR3DL2\*01v1 : ----- : -  
AOTVOKIR3DL2\*02 : ----- : -  
AOTVOKIR3DS3\*01 : ----- : -  
AOTVOKIR3DS3\*02 : ----- : -  
AOTVOKIR3DS3\*03 : ----- : -  
AOTVOKIR3DS3\*03v1 : ----- : -

\* 7020 \* 7040 \* 7060 \* 7080 \* 7100  
BAC\_clone\_Om : TCTTGTGTTTTTGTATGTTTTTAAAAAATATCTTTTTCTGGCCGGGTGAGGTGGCTCACACCTGTAATCCCAGCACCGTGGGAGGCTGAAGCAGGCAG : 7098  
AOTVOKIR3DL1\*01 : ----- : -  
AOTVOKIR2DL1\*01v1 : ----- : -  
AOTVOKIR3DS1\*01v2 : ----- : -  
AOTVOKIR3DS1\*02 : ----- : -  
AOTVOKIR3DL2\*01 : ----- : -  
AOTVOKIR3DL2\*01v1 : ----- : -



AOTVOKIR3DL2\*02 : ----- : -  
AOTVOKIR3DS3\*01 : ----- : -  
AOTVOKIR3DS3\*02 : ----- : -  
AOTVOKIR3DS3\*03 : ----- : -  
AOTVOKIR3DS3\*03v1 : ----- : -

\* 7120 \* 7140 \* 7160 \* 7180 \* 7200  
BAC\_clone\_Om : ATCACGAGGTCAAGAGATAGAGACCATCCTGGCAAACATGGTGAAGCCCCCTCTCTACTAAAAATGCAAAAATTAGCTTGGCATGGTGGTGGGCG : 7194  
AOTVOKIR3DL1\*01 : ----- : -  
AOTVOKIR2DL1\*01v1 : ----- : -  
AOTVOKIR3DS1\*01v2 : ----- : -  
AOTVOKIR3DS1\*02 : ----- : -  
AOTVOKIR3DL2\*01 : ----- : -  
AOTVOKIR3DL2\*01v1 : ----- : -  
AOTVOKIR3DL2\*02 : ----- : -  
AOTVOKIR3DS3\*01 : ----- : -  
AOTVOKIR3DS3\*02 : ----- : -  
AOTVOKIR3DS3\*03 : ----- : -  
AOTVOKIR3DS3\*03v1 : ----- : -

\* 7220 \* 7240 \* 7260 \* 7280 \*  
BAC\_clone\_Om : CCTGTAGTCCCGGCTACTCGGGAGGCTGACGCAGGAGGATCACTTGAACCCAGGAGGCGCAGGTTGCAGTGAGCTGGGATGGCACCCTGCATTCC : 7290  
AOTVOKIR3DL1\*01 : ----- : -  
AOTVOKIR2DL1\*01v1 : ----- : -  
AOTVOKIR3DS1\*01v2 : ----- : -  
AOTVOKIR3DS1\*02 : ----- : -  
AOTVOKIR3DL2\*01 : ----- : -  
AOTVOKIR3DL2\*01v1 : ----- : -  
AOTVOKIR3DL2\*02 : ----- : -  
AOTVOKIR3DS3\*01 : ----- : -  
AOTVOKIR3DS3\*02 : ----- : -  
AOTVOKIR3DS3\*03 : ----- : -  
AOTVOKIR3DS3\*03v1 : ----- : -

7300 \* 7320 \* 7340 \* 7360 \* 7380 \*  
BAC\_clone\_Om : AGCCTGGCAACAGAGCAAGACTCTGTCTCAAAAAAATTGTCTTTCCTCAGATAAATGTCCTGGAGCATTTCCTCCAGTGTTTCCTTTTAGGCATT : 7386  
AOTVOKIR3DL1\*01 : ----- : -  
AOTVOKIR2DL1\*01v1 : ----- : -  
AOTVOKIR3DS1\*01v2 : ----- : -  
AOTVOKIR3DS1\*02 : ----- : -  
AOTVOKIR3DL2\*01 : ----- : -  
AOTVOKIR3DL2\*01v1 : ----- : -  
AOTVOKIR3DL2\*02 : ----- : -

AOTVOKIR3DS3\*01 : ----- : -  
AOTVOKIR3DS3\*02 : ----- : -  
AOTVOKIR3DS3\*03 : ----- : -  
AOTVOKIR3DS3\*03v1 : ----- : -

7400 \* 7420 \* 7440 \* 7460 \* 7480  
BAC\_clone\_Om : GTATGGGTTTCAGGCTTCCGTCTTTTCACCCGTTTTTCATTTGGTTTTTGTCTATGCTGAGAGGCAGAGGTTTCAGTTTCATCTCTCTGCATGTAGATA : 7482  
AOTVOKIR3DL1\*01 : ----- : -  
AOTVOKIR2DL1\*01v1 : ----- : -  
AOTVOKIR3DS1\*01v2 : ----- : -  
AOTVOKIR3DS1\*02 : ----- : -  
AOTVOKIR3DL2\*01 : ----- : -  
AOTVOKIR3DL2\*01v1 : ----- : -  
AOTVOKIR3DL2\*02 : ----- : -  
AOTVOKIR3DS3\*01 : ----- : -  
AOTVOKIR3DS3\*02 : ----- : -  
AOTVOKIR3DS3\*03 : ----- : -  
AOTVOKIR3DS3\*03v1 : ----- : -

\* 7500 \* 7520 \* 7540 \* 7560 \* 7580  
BAC\_clone\_Om : TTCAGCTTTCCCTGCTCCATTTATTGAAAATGTTGTCCTTTTCCTGATTGTAGGTGCTTTGCCCTTACAATCATCAAAGTTCATTGGATGTAAATGC : 7578  
AOTVOKIR3DL1\*01 : ----- : -  
AOTVOKIR2DL1\*01v1 : ----- : -  
AOTVOKIR3DS1\*01v2 : ----- : -  
AOTVOKIR3DS1\*02 : ----- : -  
AOTVOKIR3DL2\*01 : ----- : -  
AOTVOKIR3DL2\*01v1 : ----- : -  
AOTVOKIR3DL2\*02 : ----- : -  
AOTVOKIR3DS3\*01 : ----- : -  
AOTVOKIR3DS3\*02 : ----- : -  
AOTVOKIR3DS3\*03 : ----- : -  
AOTVOKIR3DS3\*03v1 : ----- : -

\* 7600 \* 7620 \* 7640 \* 7660 \* 7680  
BAC\_clone\_Om : AAGGATTACGTCTGTGTTCTTCCCTCTGCTCCATTGTTCTATCAGCCTTTCTTTATGCCAGTATCATGCTGTTTTGCTTACTACAGCTTTGTAACA : 7674  
AOTVOKIR3DL1\*01 : ----- : -  
AOTVOKIR2DL1\*01v1 : ----- : -  
AOTVOKIR3DS1\*01v2 : ----- : -  
AOTVOKIR3DS1\*02 : ----- : -  
AOTVOKIR3DL2\*01 : ----- : -  
AOTVOKIR3DL2\*01v1 : ----- : -  
AOTVOKIR3DL2\*02 : ----- : -  
AOTVOKIR3DS3\*01 : ----- : -

AOTVOKIR3DS3\*02 : ----- : -  
AOTVOKIR3DS3\*03 : ----- : -  
AOTVOKIR3DS3\*03v1 : ----- : -

                  \*          7700                  \*          7720                  \*          7740                  \*          7760                  \*  
BAC\_clone\_Om : TATTTTTAAGTGGGAGAGTGTGCATGCATCCAGCACGTGTTTTGTATTTATACCTCAAATCCTTAGGACATGGGCATTGCTTTTGTGATGATTGTGGAG : 7770  
AOTVOKIR3DL1\*01 : ----- : -  
AOTVOKIR2DL1\*01v1 : ----- : -  
AOTVOKIR3DS1\*01v2 : ----- : -  
AOTVOKIR3DS1\*02 : ----- : -  
AOTVOKIR3DL2\*01 : ----- : -  
AOTVOKIR3DL2\*01v1 : ----- : -  
AOTVOKIR3DL2\*02 : ----- : -  
AOTVOKIR3DS3\*01 : ----- : -  
AOTVOKIR3DS3\*02 : ----- : -  
AOTVOKIR3DS3\*03 : ----- : -  
AOTVOKIR3DS3\*03v1 : ----- : -

                  7780                  \*          7800                  \*          7820                  \*          7840                  \*          7860                  \*  
BAC\_clone\_Om : AAGGGGGTGCCAGGGCCCATTAGATAACAGTATTGGCCATTAGTTAACCTCAAAGATTTCCAATGAGTGGAGGATAGGCACCCTCATTTCCACACC : 7866  
AOTVOKIR3DL1\*01 : ----- : -  
AOTVOKIR2DL1\*01v1 : ----- : -  
AOTVOKIR3DS1\*01v2 : ----- : -  
AOTVOKIR3DS1\*02 : ----- : -  
AOTVOKIR3DL2\*01 : ----- : -  
AOTVOKIR3DL2\*01v1 : ----- : -  
AOTVOKIR3DL2\*02 : ----- : -  
AOTVOKIR3DS3\*01 : ----- : -  
AOTVOKIR3DS3\*02 : ----- : -  
AOTVOKIR3DS3\*03 : ----- : -  
AOTVOKIR3DS3\*03v1 : ----- : -

                  7880                  \*          7900                  \*          7920                  \*          7940                  \*          7960  
BAC\_clone\_Om : TCTCTCCTGTCTGTTGTTCTGGAAATCCTTTAAGTAGCTGGCCTTCACCCACAGAACCAAGCTCCAAAAACGGTGAGAAAAGGATTCCCTCTTATCT : 7962  
AOTVOKIR3DL1\*01 : ----- : -  
AOTVOKIR2DL1\*01v1 : ----- : -  
AOTVOKIR3DS1\*01v2 : ----- : -  
AOTVOKIR3DS1\*02 : ----- : -  
AOTVOKIR3DL2\*01 : ----- : -  
AOTVOKIR3DL2\*01v1 : ----- : -  
AOTVOKIR3DL2\*02 : ----- : -  
AOTVOKIR3DS3\*01 : ----- : -  
AOTVOKIR3DS3\*02 : ----- : -

```

AOTVOKIR3DS3*03      : ----- : -
AOTVOKIR3DS3*03v1    : ----- : -

          *      7980          *      8000          *      8020          *      8040          *      8060
BAC_clone_Om         : CTGCTTTTGGAAACCTGGGGAGGTTGGTACCTTGGATTCAAGTGTTGGCTCAGTGCCTCCTAGCTCAGTGATTGTGGGGCGGTCTTCTAACATCTC : 8058
AOTVOKIR3DL1*01      : ----- : -
AOTVOKIR2DL1*01v1    : ----- : -
AOTVOKIR3DS1*01v2    : ----- : -
AOTVOKIR3DS1*02      : ----- : -
AOTVOKIR3DL2*01      : ----- : -
AOTVOKIR3DL2*01v1    : ----- : -
AOTVOKIR3DL2*02      : ----- : -
AOTVOKIR3DS3*01      : ----- : -
AOTVOKIR3DS3*02      : ----- : -
AOTVOKIR3DS3*03      : ----- : -
AOTVOKIR3DS3*03v1    : ----- : -

          *      8080          *      8100          *      8120          *      8140          *      8160
BAC_clone_Om         : TGACTCTAAGACATTACAACAGTGAAACGTATCCGGGGTTAGCAAAGGGCTCACTGAAGTCTCTTCATTTCAAATTTCCACAGCTGAGACCTCCTT : 8154
AOTVOKIR3DL1*01      : ----- : -
AOTVOKIR2DL1*01v1    : ----- : -
AOTVOKIR3DS1*01v2    : ----- : -
AOTVOKIR3DS1*02      : ----- : -
AOTVOKIR3DL2*01      : ----- : -
AOTVOKIR3DL2*01v1    : ----- : -
AOTVOKIR3DL2*02      : ----- : -
AOTVOKIR3DS3*01      : ----- : -
AOTVOKIR3DS3*02      : ----- : -
AOTVOKIR3DS3*03      : ----- : -
AOTVOKIR3DS3*03v1    : ----- : -

          *      8180          *      8200          *      8220          *      8240          *
BAC_clone_Om         : CAGGCTAAATGGATGAGTACAAATCTGACATCCTTCTCAGGGATAATGTGGTGGTTTTTATGCCTGCATTTCAAACCTGGAGGACAAATTCATGGGG : 8250
AOTVOKIR3DL1*01      : ----- : -
AOTVOKIR2DL1*01v1    : ----- : -
AOTVOKIR3DS1*01v2    : ----- : -
AOTVOKIR3DS1*02      : ----- : -
AOTVOKIR3DL2*01      : ----- : -
AOTVOKIR3DL2*01v1    : ----- : -
AOTVOKIR3DL2*02      : ----- : -
AOTVOKIR3DS3*01      : ----- : -
AOTVOKIR3DS3*02      : ----- : -
AOTVOKIR3DS3*03      : ----- : -

```

```

AOTVOKIR3DS3*03v1 : ----- : -

      8260      *      8280      *      8300      *      8320      *      8340      *
BAC_clone_Om      : GCTTGTGAGAGGAAAGGGAAGGGAACATCTGATGAGCGCAGGGTGTCTGCAGGATTCCACTTACCATGGAATAAGCTCCTGTTGCTCATGATGC : 8346
AOTVOKIR3DL1*01   : ----- : -
AOTVOKIR2DL1*01v1 : ----- : -
AOTVOKIR3DS1*01v2 : ----- : -
AOTVOKIR3DS1*02   : ----- : -
AOTVOKIR3DL2*01   : ----- : -
AOTVOKIR3DL2*01v1 : ----- : -
AOTVOKIR3DL2*02   : ----- : -
AOTVOKIR3DS3*01   : ----- : -
AOTVOKIR3DS3*02   : ----- : -
AOTVOKIR3DS3*03   : ----- : -
AOTVOKIR3DS3*03v1 : ----- : -

      8360      *      8380      *      8400      *      8420      *      8440
BAC_clone_Om      : AACCCCTGGCTGACTCAGCAGAGCAATAGTCTTGCAGTAAGAGAGAACGTAGGTTCATCCACAGATATGAGGCTTCCACTCACTCGCTCGTTCAGCCC : 8442
AOTVOKIR3DL1*01   : ----- : -
AOTVOKIR2DL1*01v1 : ----- : -
AOTVOKIR3DS1*01v2 : ----- : -
AOTVOKIR3DS1*02   : ----- : -
AOTVOKIR3DL2*01   : ----- : -
AOTVOKIR3DL2*01v1 : ----- : -
AOTVOKIR3DL2*02   : ----- : -
AOTVOKIR3DS3*01   : ----- : -
AOTVOKIR3DS3*02   : ----- : -
AOTVOKIR3DS3*03   : ----- : -
AOTVOKIR3DS3*03v1 : ----- : -

      *      8460      *      8480      *      8500      *      8520      *      8540
BAC_clone_Om      : CTGCGCCGCGCTCTTACTGGGCAGTGTGGAACCCGTTCCCTGTTGTTGCTGTAATAAATTTCCACAAGCTTGATGGATGACAACAACACAGCTTTCA : 8538
AOTVOKIR3DL1*01   : ----- : -
AOTVOKIR2DL1*01v1 : ----- : -
AOTVOKIR3DS1*01v2 : ----- : -
AOTVOKIR3DS1*02   : ----- : -
AOTVOKIR3DL2*01   : ----- : -
AOTVOKIR3DL2*01v1 : ----- : -
AOTVOKIR3DL2*02   : ----- : -
AOTVOKIR3DS3*01   : ----- : -
AOTVOKIR3DS3*02   : ----- : -
AOTVOKIR3DS3*03   : ----- : -
AOTVOKIR3DS3*03v1 : ----- : -

```

|                   |   |                                                                                                  |   |      |   |      |   |      |   |      |   |      |
|-------------------|---|--------------------------------------------------------------------------------------------------|---|------|---|------|---|------|---|------|---|------|
|                   | * | 8560                                                                                             | * | 8580 | * | 8600 | * | 8620 | * | 8640 |   |      |
| BAC_clone_Om      | : | AAACTATCTTACAGTGTTATAGCTAGGAAATATGAAATGCATCTCACGGCGCTAAAATCAACGTGACAGCGAGGCTGCCTTCCCTCTGAAGGTTTG |   |      |   |      |   |      |   |      | : | 8634 |
| AOTVOKIR3DL1*01   | : | -----                                                                                            |   |      |   |      |   |      |   |      | : | -    |
| AOTVOKIR2DL1*01v1 | : | -----                                                                                            |   |      |   |      |   |      |   |      | : | -    |
| AOTVOKIR3DS1*01v2 | : | -----                                                                                            |   |      |   |      |   |      |   |      | : | -    |
| AOTVOKIR3DS1*02   | : | -----                                                                                            |   |      |   |      |   |      |   |      | : | -    |
| AOTVOKIR3DL2*01   | : | -----                                                                                            |   |      |   |      |   |      |   |      | : | -    |
| AOTVOKIR3DL2*01v1 | : | -----                                                                                            |   |      |   |      |   |      |   |      | : | -    |
| AOTVOKIR3DL2*02   | : | -----                                                                                            |   |      |   |      |   |      |   |      | : | -    |
| AOTVOKIR3DS3*01   | : | -----                                                                                            |   |      |   |      |   |      |   |      | : | -    |
| AOTVOKIR3DS3*02   | : | -----                                                                                            |   |      |   |      |   |      |   |      | : | -    |
| AOTVOKIR3DS3*03   | : | -----                                                                                            |   |      |   |      |   |      |   |      | : | -    |
| AOTVOKIR3DS3*03v1 | : | -----                                                                                            |   |      |   |      |   |      |   |      | : | -    |

|                   |   |                                                                                             |   |      |   |      |   |      |   |  |   |      |
|-------------------|---|---------------------------------------------------------------------------------------------|---|------|---|------|---|------|---|--|---|------|
|                   | * | 8660                                                                                        | * | 8680 | * | 8700 | * | 8720 | * |  |   |      |
| BAC_clone_Om      | : | AGGCGAGAATCTGCCTCCACATTTCCACCTCCTAGAGGCTCCACATTCCTCGGCTCCTGGTCCCCTTCCCTCCTTAAAAGCACCCAAAGAC |   |      |   |      |   |      |   |  | : | 8730 |
| AOTVOKIR3DL1*01   | : | -----                                                                                       |   |      |   |      |   |      |   |  | : | -    |
| AOTVOKIR2DL1*01v1 | : | -----                                                                                       |   |      |   |      |   |      |   |  | : | -    |
| AOTVOKIR3DS1*01v2 | : | -----                                                                                       |   |      |   |      |   |      |   |  | : | -    |
| AOTVOKIR3DS1*02   | : | -----                                                                                       |   |      |   |      |   |      |   |  | : | -    |
| AOTVOKIR3DL2*01   | : | -----                                                                                       |   |      |   |      |   |      |   |  | : | -    |
| AOTVOKIR3DL2*01v1 | : | -----                                                                                       |   |      |   |      |   |      |   |  | : | -    |
| AOTVOKIR3DL2*02   | : | -----                                                                                       |   |      |   |      |   |      |   |  | : | -    |
| AOTVOKIR3DS3*01   | : | -----                                                                                       |   |      |   |      |   |      |   |  | : | -    |
| AOTVOKIR3DS3*02   | : | -----                                                                                       |   |      |   |      |   |      |   |  | : | -    |
| AOTVOKIR3DS3*03   | : | -----                                                                                       |   |      |   |      |   |      |   |  | : | -    |
| AOTVOKIR3DS3*03v1 | : | -----                                                                                       |   |      |   |      |   |      |   |  | : | -    |

|                   |   |                                                                                                    |   |      |   |      |   |      |   |      |   |      |
|-------------------|---|----------------------------------------------------------------------------------------------------|---|------|---|------|---|------|---|------|---|------|
|                   |   | 8740                                                                                               | * | 8760 | * | 8780 | * | 8800 | * | 8820 | * |      |
| BAC_clone_Om      | : | TGGTCACGTCTCTCACACGGCATCACTCAACCCTTCTTCCCTTACCACACCTCTTTCTCTGAATGTTACTCGCCCTCTTCCCTCATCTTTCAAGGACT |   |      |   |      |   |      |   |      | : | 8826 |
| AOTVOKIR3DL1*01   | : | -----                                                                                              |   |      |   |      |   |      |   |      | : | -    |
| AOTVOKIR2DL1*01v1 | : | -----                                                                                              |   |      |   |      |   |      |   |      | : | -    |
| AOTVOKIR3DS1*01v2 | : | -----                                                                                              |   |      |   |      |   |      |   |      | : | -    |
| AOTVOKIR3DS1*02   | : | -----                                                                                              |   |      |   |      |   |      |   |      | : | -    |
| AOTVOKIR3DL2*01   | : | -----                                                                                              |   |      |   |      |   |      |   |      | : | -    |
| AOTVOKIR3DL2*01v1 | : | -----                                                                                              |   |      |   |      |   |      |   |      | : | -    |
| AOTVOKIR3DL2*02   | : | -----                                                                                              |   |      |   |      |   |      |   |      | : | -    |
| AOTVOKIR3DS3*01   | : | -----                                                                                              |   |      |   |      |   |      |   |      | : | -    |
| AOTVOKIR3DS3*02   | : | -----                                                                                              |   |      |   |      |   |      |   |      | : | -    |
| AOTVOKIR3DS3*03   | : | -----                                                                                              |   |      |   |      |   |      |   |      | : | -    |
| AOTVOKIR3DS3*03v1 | : | -----                                                                                              |   |      |   |      |   |      |   |      | : | -    |

```

      8840          *      8860          *      8880          *      8900          *      8920
BAC_clone_Om      : TTGGGATTCTATTGAGTATGCCGAGATAATCCATCATAATCTCCCTAAAATCGTCGAGGATAACCTCCTTTTAAATTCAGCTGATCAGCATCTTCA : 8922
AOTVOKIR3DL1*01   : ----- : -
AOTVOKIR2DL1*01v1 : ----- : -
AOTVOKIR3DS1*01v2 : ----- : -
AOTVOKIR3DS1*02   : ----- : -
AOTVOKIR3DL2*01   : ----- : -
AOTVOKIR3DL2*01v1 : ----- : -
AOTVOKIR3DL2*02   : ----- : -
AOTVOKIR3DS3*01   : ----- : -
AOTVOKIR3DS3*02   : ----- : -
AOTVOKIR3DS3*03   : ----- : -
AOTVOKIR3DS3*03v1 : ----- : -

```

```

      *      8940          *      8960          *      8980          *      9000          *      9020
BAC_clone_Om      : TTGCTCCTTTTCATGTAAAATAACATGTTTCACAAGATATGGGGGCTAGGACACGGACATTTTCAGGGTAGGGCGGCATTTCTCTGCCTTCCACAAA : 9018
AOTVOKIR3DL1*01   : ----- : -
AOTVOKIR2DL1*01v1 : ----- : -
AOTVOKIR3DS1*01v2 : ----- : -
AOTVOKIR3DS1*02   : ----- : -
AOTVOKIR3DL2*01   : ----- : -
AOTVOKIR3DL2*01v1 : ----- : -
AOTVOKIR3DL2*02   : ----- : -
AOTVOKIR3DS3*01   : ----- : -
AOTVOKIR3DS3*02   : ----- : -
AOTVOKIR3DS3*03   : ----- : -
AOTVOKIR3DS3*03v1 : ----- : -

```

```

      *      9040          *      9060          *      9080          *      9100          *      9120
BAC_clone_Om      : TGGTAAACAGGATGCATTTGTCCTTTGCTCTTAGGACACTGATATTGCAGGTGGTTAAATGGGAGGGCAGAACATGAACGCACAGGTGGGGCAATA : 9114
AOTVOKIR3DL1*01   : ----- : -
AOTVOKIR2DL1*01v1 : ----- : -
AOTVOKIR3DS1*01v2 : ----- : -
AOTVOKIR3DS1*02   : ----- : -
AOTVOKIR3DL2*01   : ----- : -
AOTVOKIR3DL2*01v1 : ----- : -
AOTVOKIR3DL2*02   : ----- : -
AOTVOKIR3DS3*01   : ----- : -
AOTVOKIR3DS3*02   : ----- : -
AOTVOKIR3DS3*03   : ----- : -
AOTVOKIR3DS3*03v1 : ----- : -

```

```

          *      9140          *      9160          *      9180          *      9200          *
BAC_clone_Om      : ATCAATGATCCATTGTGAAGCAACTGTGCACAAAATGTATTAATTTGTCTATTTATTTACTTATTTGAGGTGAAGTCATGCCCCGTTTCCAGGCTG : 9210
AOTVOKIR3DL1*01   : ----- : -
AOTVOKIR2DL1*01v1 : ----- : -
AOTVOKIR3DS1*01v2 : ----- : -
AOTVOKIR3DS1*02   : ----- : -
AOTVOKIR3DL2*01   : ----- : -
AOTVOKIR3DL2*01v1 : ----- : -
AOTVOKIR3DL2*02   : ----- : -
AOTVOKIR3DS3*01   : ----- : -
AOTVOKIR3DS3*02   : ----- : -
AOTVOKIR3DS3*03   : ----- : -
AOTVOKIR3DS3*03v1 : ----- : -

```

```

          9220          *      9240          *      9260          *      9280          *      9300          *
BAC_clone_Om      : TAATTCAGTGACATGATCTCGGCTCACTGCAACCTCCACTTTCCAGGTTCAAGAGATTCTCCTGACTCAGCCTCCCAAGTAACTGGGTTTACAATC : 9306
AOTVOKIR3DL1*01   : ----- : -
AOTVOKIR2DL1*01v1 : ----- : -
AOTVOKIR3DS1*01v2 : ----- : -
AOTVOKIR3DS1*02   : ----- : -
AOTVOKIR3DL2*01   : ----- : -
AOTVOKIR3DL2*01v1 : ----- : -
AOTVOKIR3DL2*02   : ----- : -
AOTVOKIR3DS3*01   : ----- : -
AOTVOKIR3DS3*02   : ----- : -
AOTVOKIR3DS3*03   : ----- : -
AOTVOKIR3DS3*03v1 : ----- : -

```

```

          9320          *      9340          *      9360          *      9380          *      9400
BAC_clone_Om      : CCCTCCAGCACACTCAGCTAATTTTCTCTTATATTTTTTTAGTAGAGATGGGGTTTTCTCCGTGTTTTACAGGCTGTCTTGAACCTCCCAACCTTAACT : 9402
AOTVOKIR3DL1*01   : ----- : -
AOTVOKIR2DL1*01v1 : ----- : -
AOTVOKIR3DS1*01v2 : ----- : -
AOTVOKIR3DS1*02   : ----- : -
AOTVOKIR3DL2*01   : ----- : -
AOTVOKIR3DL2*01v1 : ----- : -
AOTVOKIR3DL2*02   : ----- : -
AOTVOKIR3DS3*01   : ----- : -
AOTVOKIR3DS3*02   : ----- : -
AOTVOKIR3DS3*03   : ----- : -
AOTVOKIR3DS3*03v1 : ----- : -

```

```

          *      9420          *      9440          *      9460          *      9480          *      9500

```



BAC\_clone\_Om : GATCTCACTGCCTCAGCCTCCCAAACGGCTGGGACTCCAGGCGTGAGCCACAGCACCCAGCTGAAATTTAAAATAAATAATAGATAATGCTAAGCG : 9498  
AOTVOKIR3DL1\*01 : ----- : -  
AOTVOKIR2DL1\*01v1 : ----- : -  
AOTVOKIR3DS1\*01v2 : ----- : -  
AOTVOKIR3DS1\*02 : ----- : -  
AOTVOKIR3DL2\*01 : ----- : -  
AOTVOKIR3DL2\*01v1 : ----- : -  
AOTVOKIR3DL2\*02 : ----- : -  
AOTVOKIR3DS3\*01 : ----- : -  
AOTVOKIR3DS3\*02 : ----- : -  
AOTVOKIR3DS3\*03 : ----- : -  
AOTVOKIR3DS3\*03v1 : ----- : -

\* 9520 \* 9540 \* 9560 \* 9580 \* 9600  
BAC\_clone\_Om : TAAAATGTCAGAAGACAGAGTAGGTTTCATTGATCGACAATATTTGTGACCTTAATGAAAAAATGATTTCAACTCTTGGAAGATAGGTGAAAGGAT : 9594  
AOTVOKIR3DL1\*01 : ----- : -  
AOTVOKIR2DL1\*01v1 : ----- : -  
AOTVOKIR3DS1\*01v2 : ----- : -  
AOTVOKIR3DS1\*02 : ----- : -  
AOTVOKIR3DL2\*01 : ----- : -  
AOTVOKIR3DL2\*01v1 : ----- : -  
AOTVOKIR3DL2\*02 : ----- : -  
AOTVOKIR3DS3\*01 : ----- : -  
AOTVOKIR3DS3\*02 : ----- : -  
AOTVOKIR3DS3\*03 : ----- : -  
AOTVOKIR3DS3\*03v1 : ----- : -

\* 9620 \* 9640 \* 9660 \* 9680 \*  
BAC\_clone\_Om : TTTTCATGCAGAGTTGTCAGCTGTGAAGACACAAAGGTGCAAACAATCTTGTGTTGAAGGAAGAGGCTGTGCCTGACATGCTGGGAATGAGATGGG : 9690  
AOTVOKIR3DL1\*01 : ----- : -  
AOTVOKIR2DL1\*01v1 : ----- : -  
AOTVOKIR3DS1\*01v2 : ----- : -  
AOTVOKIR3DS1\*02 : ----- : -  
AOTVOKIR3DL2\*01 : ----- : -  
AOTVOKIR3DL2\*01v1 : ----- : -  
AOTVOKIR3DL2\*02 : ----- : -  
AOTVOKIR3DS3\*01 : ----- : -  
AOTVOKIR3DS3\*02 : ----- : -  
AOTVOKIR3DS3\*03 : ----- : -  
AOTVOKIR3DS3\*03v1 : ----- : -

9700 \* 9720 \* 9740 \* 9760 \* 9780 \*  
BAC\_clone\_Om : GAGAATTACAGGATGACTGTAGAGACGGGGAGCACGCTGGGTACACAGGAAAATAAGAGGGAAAAGGAGTGTGTGTTTTCTACTCACAGCCATTGG : 9786

AOTVOKIR3DL1\*01 : ----- : -  
AOTVOKIR2DL1\*01v1 : ----- : -  
AOTVOKIR3DS1\*01v2 : ----- : -  
AOTVOKIR3DS1\*02 : ----- : -  
AOTVOKIR3DL2\*01 : ----- : -  
AOTVOKIR3DL2\*01v1 : ----- : -  
AOTVOKIR3DL2\*02 : ----- : -  
AOTVOKIR3DS3\*01 : ----- : -  
AOTVOKIR3DS3\*02 : ----- : -  
AOTVOKIR3DS3\*03 : ----- : -  
AOTVOKIR3DS3\*03v1 : ----- : -

9800 \* 9820 \* 9840 \* 9860 \* 9880  
BAC\_clone\_Om : AATTCACCAGGGGCGAACTAGGAATCCCTACATGATTAACAGTGACACTCATTCCAGGGAGACAGAACACACACAATGAATTACAGAAAGCAGG : 9882  
AOTVOKIR3DL1\*01 : ----- : -  
AOTVOKIR2DL1\*01v1 : ----- : -  
AOTVOKIR3DS1\*01v2 : ----- : -  
AOTVOKIR3DS1\*02 : ----- : -  
AOTVOKIR3DL2\*01 : ----- : -  
AOTVOKIR3DL2\*01v1 : ----- : -  
AOTVOKIR3DL2\*02 : ----- : -  
AOTVOKIR3DS3\*01 : ----- : -  
AOTVOKIR3DS3\*02 : ----- : -  
AOTVOKIR3DS3\*03 : ----- : -  
AOTVOKIR3DS3\*03v1 : ----- : -

\* 9900 \* 9920 \* 9940 \* 9960 \* 9980  
BAC\_clone\_Om : TTCATTACTAACAGACAAGCAGCAAGTGACAACAGGAGCTACGCTTCAGGGTGAGCCAGTCCCCTAAGGCTCAGAAAAGCTGCCCCGGGACACACGG : 9978  
AOTVOKIR3DL1\*01 : ----- : -  
AOTVOKIR2DL1\*01v1 : ----- : -  
AOTVOKIR3DS1\*01v2 : ----- : -  
AOTVOKIR3DS1\*02 : ----- : -  
AOTVOKIR3DL2\*01 : ----- : -  
AOTVOKIR3DL2\*01v1 : ----- : -  
AOTVOKIR3DL2\*02 : ----- : -  
AOTVOKIR3DS3\*01 : ----- : -  
AOTVOKIR3DS3\*02 : ----- : -  
AOTVOKIR3DS3\*03 : ----- : -  
AOTVOKIR3DS3\*03v1 : ----- : -

\* 10000 \* 10020 \* 10040 \* 10060 \* 10080  
BAC\_clone\_Om : AGTCACCCCATATGCAGTGTAGCTGTGGGAACCGAAAAGCAGCCCCACCTGGGCTTTGCACCCTGGAGCCACAGGAAGCGCTGAGCTAAAGCCCTG : 10074  
AOTVOKIR3DL1\*01 : ----- : -

AOTVOKIR2DL1\*01v1 : ----- : -  
AOTVOKIR3DS1\*01v2 : ----- : -  
AOTVOKIR3DS1\*02 : ----- : -  
AOTVOKIR3DL2\*01 : ----- : -  
AOTVOKIR3DL2\*01v1 : ----- : -  
AOTVOKIR3DL2\*02 : ----- : -  
AOTVOKIR3DS3\*01 : ----- : -  
AOTVOKIR3DS3\*02 : ----- : -  
AOTVOKIR3DS3\*03 : ----- : -  
AOTVOKIR3DS3\*03v1 : ----- : -

                  \*      10100                  \*      10120                  \*      10140                  \*      10160                  \*      1  
BAC\_clone\_Om      : CCTCACACCCTCCTCTAGGAAGAGCAGAAGAGAGCCCAGGCTGTTCTGGGACGTTCCCTCCTGATCTCAGGACGTTGCTGTCTTAGTCCGTTTTTGT : 10170  
AOTVOKIR3DL1\*01   : ----- : -  
AOTVOKIR2DL1\*01v1 : ----- : -  
AOTVOKIR3DS1\*01v2 : ----- : -  
AOTVOKIR3DS1\*02   : ----- : -  
AOTVOKIR3DL2\*01   : ----- : -  
AOTVOKIR3DL2\*01v1 : ----- : -  
AOTVOKIR3DL2\*02   : ----- : -  
AOTVOKIR3DS3\*01   : ----- : -  
AOTVOKIR3DS3\*02   : ----- : -  
AOTVOKIR3DS3\*03   : ----- : -  
AOTVOKIR3DS3\*03v1 : ----- : -

                  0180                  \*      10200                  \*      10220                  \*      10240                  \*      10260                  \*  
BAC\_clone\_Om      : TGCTATCAGGGAACACCTGAGCCTGGGTAACCTTCTAAAGAAAACAGATGTGTTTTGGCTCACAGTTCTGCAGGCTGTACTAGAAGCATGGCACCAGC : 10266  
AOTVOKIR3DL1\*01   : ----- : -  
AOTVOKIR2DL1\*01v1 : ----- : -  
AOTVOKIR3DS1\*01v2 : ----- : -  
AOTVOKIR3DS1\*02   : ----- : -  
AOTVOKIR3DL2\*01   : ----- : -  
AOTVOKIR3DL2\*01v1 : ----- : -  
AOTVOKIR3DL2\*02   : ----- : -  
AOTVOKIR3DS3\*01   : ----- : -  
AOTVOKIR3DS3\*02   : ----- : -  
AOTVOKIR3DS3\*03   : ----- : -  
AOTVOKIR3DS3\*03v1 : ----- : -

                  10280                  \*      10300                  \*      10320                  \*      10340                  \*      10360  
BAC\_clone\_Om      : ATCTATTTCTGTGATGACCTGAGGCCGCTTTCACTCTGGCAGAAGGAAGGGGGCCCTTGTGTGCAGACACCACAGAGATCACAGGGCAAAAGAGC : 10362  
AOTVOKIR3DL1\*01   : ----- : -  
AOTVOKIR2DL1\*01v1 : ----- : -

AOTVOKIR3DS1\*01v2 : ----- : -  
AOTVOKIR3DS1\*02 : ----- : -  
AOTVOKIR3DL2\*01 : ----- : -  
AOTVOKIR3DL2\*01v1 : ----- : -  
AOTVOKIR3DL2\*02 : ----- : -  
AOTVOKIR3DS3\*01 : ----- : -  
AOTVOKIR3DS3\*02 : ----- : -  
AOTVOKIR3DS3\*03 : ----- : -  
AOTVOKIR3DS3\*03v1 : ----- : -

\* 10380 \* 10400 \* 10420 \* 10440 \* 10460  
BAC\_clone\_Om : GAGTGAGGTCAGGCCATGGAGCCTCCAAGCTCTTTTGTAGCAACCAGCTCTCAGGGAACTAACAGAAAACCTTGCTAACCCCGTCTCATGGGGGCAGC : 10458  
AOTVOKIR3DL1\*01 : ----- : -  
AOTVOKIR2DL1\*01v1 : ----- : -  
AOTVOKIR3DS1\*01v2 : ----- : -  
AOTVOKIR3DS1\*02 : ----- : -  
AOTVOKIR3DL2\*01 : ----- : -  
AOTVOKIR3DL2\*01v1 : ----- : -  
AOTVOKIR3DL2\*02 : ----- : -  
AOTVOKIR3DS3\*01 : ----- : -  
AOTVOKIR3DS3\*02 : ----- : -  
AOTVOKIR3DS3\*03 : ----- : -  
AOTVOKIR3DS3\*03v1 : ----- : -

\* 10480 \* 10500 \* 10520 \* 10540 \* 10560  
BAC\_clone\_Om : ATTAATCTATTTCATGATGGATCCACCCCATGACCGAAACACATCTCAATAGGCGCAAACCTCCCACACTGCAAGTTAAATATCTAGGTTTGGAGGA : 10554  
AOTVOKIR3DL1\*01 : ----- : -  
AOTVOKIR2DL1\*01v1 : ----- : -  
AOTVOKIR3DS1\*01v2 : ----- : -  
AOTVOKIR3DS1\*02 : ----- : -  
AOTVOKIR3DL2\*01 : ----- : -  
AOTVOKIR3DL2\*01v1 : ----- : -  
AOTVOKIR3DL2\*02 : ----- : -  
AOTVOKIR3DS3\*01 : ----- : -  
AOTVOKIR3DS3\*02 : ----- : -  
AOTVOKIR3DS3\*03 : ----- : -  
AOTVOKIR3DS3\*03v1 : ----- : -

\* 10580 \* 10600 \* 10620 \* 10640 \* 1  
BAC\_clone\_Om : GCCAGACATTCAAACCTGTAGCAGTGGTATCTCCAGCACATTCTCTGATTATTGAGAACTATAGCTGAGAAAGCAGGAGAAATCTGGGTCTCCTGCC : 10650  
AOTVOKIR3DL1\*01 : ----- : -  
AOTVOKIR2DL1\*01v1 : ----- : -  
AOTVOKIR3DS1\*01v2 : ----- : -

AOTVOKIR3DS1\*02 : ----- : -  
 AOTVOKIR3DL2\*01 : ----- : -  
 AOTVOKIR3DL2\*01v1 : ----- : -  
 AOTVOKIR3DL2\*02 : ----- : -  
 AOTVOKIR3DS3\*01 : ----- : -  
 AOTVOKIR3DS3\*02 : ----- : -  
 AOTVOKIR3DS3\*03 : ----- : -  
 AOTVOKIR3DS3\*03v1 : ----- : -

0660 \* 10680 \* 10700 \* 10720 \* 10740 \*  
 BAC\_clone\_Om : ACTGGGGTCTGGTTCTAAAGAGACGCTGTGTGTGGTTACCTGGCAGTGAAGAGATGAGAGATGATCCCTGAAGAGGAAGTGTGGTCTGAGCTGC : 10746  
 AOTVOKIR3DL1\*01 : ----- : -  
 AOTVOKIR2DL1\*01v1 : ----- : -  
 AOTVOKIR3DS1\*01v2 : ----- : -  
 AOTVOKIR3DS1\*02 : ----- : -  
 AOTVOKIR3DL2\*01 : ----- : -  
 AOTVOKIR3DL2\*01v1 : ----- : -  
 AOTVOKIR3DL2\*02 : ----- : -  
 AOTVOKIR3DS3\*01 : ----- : -  
 AOTVOKIR3DS3\*02 : ----- : -  
 AOTVOKIR3DS3\*03 : ----- : -  
 AOTVOKIR3DS3\*03v1 : ----- : -

**EXON 7**

10760 \* 10780 \* 10800 \* 10820 \* 10840  
 BAC\_clone\_Om : TTACTGGGTTCCCATCTTCCTCCAGGTTTCCCCAGACACCTGCATGTTCTCATTGGGTCTCAGTGGTCATCATCCCTTTCACCATCCTCCTCTTC : 10842  
 AOTVOKIR3DL1\*01 : -----GTAACCCCGACACCTGCACGTTCTGATTGGGTCTCAGTGGTCATCATCCCTTTCACCATCCTCCTCTTC : 1017  
 AOTVOKIR2DL1\*01v1 : -----GTAACCCCGACACCTGCACGTTCTGATTGGGTCTCAGTGGTCATCATCCCTTTCACCATCCTCCTCTTC : 723  
 AOTVOKIR3DS1\*01v2 : -----GTAACCCCGACACCTGCACGTTCTGATTGGGTCTCAGTGGTCATCATCCCTTTCACCATCCTCCTCTTC : 1017  
 AOTVOKIR3DS1\*02 : -----GTAACCCCGACACCTGCACGTTCTGATTGGGTCTCAGTGGTCATCATCCCTTTCACCATCCTCCTCTTC : 1017  
 AOTVOKIR3DL2\*01 : -----GTAACCCCGACACCTGCACGTTCTGATTGGGTCTCAGTGGTCATCATCCCTTTCACCATCCTCCTCTTC : 1017  
 AOTVOKIR3DL2\*01v1 : -----GTAACCCCGACACCTGCACGTTCTGATTGGGTCTCAGTGGTCATCATCCCTTTCACCATCCTCCTCTTC : 981  
 AOTVOKIR3DL2\*02 : -----GTAACCCCGACACCTGCACGTTCTGATTGGGTCTCAGTGGTCATCATCCCTTTCACCATCCTCCTCTTC : 1017  
 AOTVOKIR3DS3\*01 : -----GTTTCCCCAGACACCTGCACGTTCTAATTCGGTCTCAGTGGTCATCATCCCTTTCACCATCCTCCTCTTC : 981  
 AOTVOKIR3DS3\*02 : -----GTTTCCCCAGACACCTGCACGTTCTAATTCGGTCTCAGTGGTCATCATCCCTTTCACCATCCTCCTCTTC : 981  
 AOTVOKIR3DS3\*03 : -----GTTTCCCCAGACACCTGCACGTTCTAATTCGGTCTCAGTGGTCATCATCCCTTTCACCATCCTCCTCTTC : 999  
 AOTVOKIR3DS3\*03v1 : ----- : -

gt cccagacacctgcacgttct att ggt ctcagtggtcatcatccc ttcaccatcctcctcttc

\* 10860 \* 10880 \* 10900 \* 10920 \* 10940  
 BAC\_clone\_Om : TTTCTCATTCTCGCTGGTGGTCCAACAAAAGGTAAGTCTCATGAAGCAGAGGCCGAGACCTCAGGGCCGTGTGCGGAAGCAGGATGGGAGCA : 10938  
 AOTVOKIR3DL1\*01 : TTTCTCATTCTCGCTGGTGGTCCAACAAAAGA----- : 1051  
 AOTVOKIR2DL1\*01v1 : TTTCTCATTCTCGCTGGTGGTCCAACAAAAGA----- : 757  
 AOTVOKIR3DS1\*01v2 : TTTCTCATTCTCGCTGGTGGTCCAACAAAAGA----- : 1051  
 AOTVOKIR3DS1\*02 : TTTCTCATTCTCGCTGGTGGTCCAACAAAAGA----- : 1051

```

AOTVOKIR3DL2*01 : TTTCTCATTCTCGCTGGTGGTCCAACAAAAAGA----- : 1051
AOTVOKIR3DL2*01v1 : TTTCTCATTCTCGCTGGTGGTCCAACAAAAAGA----- : 1015
AOTVOKIR3DL2*02 : TTTCTCATTCTCGCTGGTGGTCCAACAAAAAGA----- : 1051
AOTVOKIR3DS3*01 : TTTCTCATTCTCGCTGGTGGTCCAACAAAAAGA----- : 1015
AOTVOKIR3DS3*02 : TTTCTCATTCTCGCTGGTGGTCCAACAAAAAGGAGTAAGTCTCATGAAGCAGAGGCCGGAGACCTCAGGGCCGTGTGCAGAAGCGGGATGAGAGCA : 1077
AOTVOKIR3DS3*03 : TTTCTCATTCTCGCTGGTGGTCCAACAAAAAGGA----- : 1033
AOTVOKIR3DS3*03v1 : ----- : -
                    tttctcattc tcgctggtggtccaacaaaa ga

```

```

                    *      10960          *      10980          *      11000          *      11020          *      11040
BAC_clone_Om      : CGCGGGTGTGTGTTCTTCATCAGCGGGATGGTCTCTGGCCCAAGGCAGGAGCTGCAGAGGCAGGGCTTTCTAGAGAGAGCACCAGACACCCTGCCC : 11034
AOTVOKIR3DL1*01  : ----- : -
AOTVOKIR2DL1*01v1 : ----- : -
AOTVOKIR3DS1*01v2 : ----- : -
AOTVOKIR3DS1*02  : ----- : -
AOTVOKIR3DL2*01  : ----- : -
AOTVOKIR3DL2*01v1 : ----- : -
AOTVOKIR3DL2*02  : ----- : -
AOTVOKIR3DS3*01  : ----- : -
AOTVOKIR3DS3*02  : CGCGGGTGTGTGTTCTTCATCAGCGGGATGGTCTCTGGCCCAAGGCAGGAGCTGCAGAGGCAGAGCTTTCTAGAGAGAGCACCAGACACCCTGTCC : 1173
AOTVOKIR3DS3*03  : ----- : -
AOTVOKIR3DS3*03v1 : ----- : -

```

```

                    *      11060          *      11080          *      11100          *      11120          *      1
BAC_clone_Om      : CTGCCTTCAGCTCAGAATCAATGGGATGGAAATTGAGAGCTCTTCATGGGAGGGGTCCTTGTACCCAGAGAGACAGAATGTGTGAGTCAGGCTGTT : 11130
AOTVOKIR3DL1*01  : ----- : -
AOTVOKIR2DL1*01v1 : ----- : -
AOTVOKIR3DS1*01v2 : ----- : -
AOTVOKIR3DS1*02  : ----- : -
AOTVOKIR3DL2*01  : ----- : -
AOTVOKIR3DL2*01v1 : ----- : -
AOTVOKIR3DL2*02  : ----- : -
AOTVOKIR3DS3*01  : ----- : -
AOTVOKIR3DS3*02  : CTGCCTTCAGCTCAGAAGCAATGGGATGGGAATTGA----- : 1209
AOTVOKIR3DS3*03  : ----- : -
AOTVOKIR3DS3*03v1 : ----- : -

```

```

                    1140          *      11160          *      11180          *      11200          *      11220          *
BAC_clone_Om      : GACAGCTGAGGGGCTCAGGCACCCATGGCCTCCCCCTGTGTGTTGGTGTCTGCACATGAAATGAGGACACAGAAGGGCCCTCCCAGGTGTTTTGA : 11226
AOTVOKIR3DL1*01  : ----- : -
AOTVOKIR2DL1*01v1 : ----- : -
AOTVOKIR3DS1*01v2 : ----- : -
AOTVOKIR3DS1*02  : ----- : -
AOTVOKIR3DL2*01  : ----- : -

```

AOTVOKIR3DL2\*01v1 : ----- : -  
AOTVOKIR3DL2\*02 : ----- : -  
AOTVOKIR3DS3\*01 : ----- : -  
AOTVOKIR3DS3\*02 : ----- : -  
AOTVOKIR3DS3\*03 : ----- : -  
AOTVOKIR3DS3\*03v1 : ----- : -

**EXON 8**

11240 11260 \* 11280 \* 11300 \* 11320  
BAC\_clone\_Om : TGACTTCTGTCTCCTACAGATGCTGCTGTAATGAACCAAGAACCTGGGGTGGACAGAACAGTGAACAGGGAGGTAGGTCCTCCTCAGCCCAGCCTT : 11322  
AOTVOKIR3DL1\*01 : -----ATGCTTCTGTAATGAACCAAGAGCCTGGGGAGGACAGAACAGTGAACAGGGAG----- : 1104  
AOTVOKIR2DL1\*01v1 : -----ATGCTTCTGTAATGAACCAAGAGCCTGGGGAGGACAGAACAGTGAACAGGGAG----- : 810  
AOTVOKIR3DS1\*01v2 : ----- : -  
AOTVOKIR3DS1\*02 : ----- : -  
AOTVOKIR3DL2\*01 : -----ATGCTTCTGTAATGAACCAAGAGCCTGGGGAGGACAGAACAGTGAACAGGGAG----- : 1104  
AOTVOKIR3DL2\*01v1 : -----ATGCTTCTGTAATGAACCAAGAGCCTGGGGAGGACAGAACAGTGAACAGGGAG----- : 1068  
AOTVOKIR3DL2\*02 : -----ATGCTTCTGTAATGAACCAAGAGCCTGGGGAGGACAGAACAGTGAACAGGGAG----- : 1104  
AOTVOKIR3DS3\*01 : -----ATGCTGCTGTAATGAACCAAGAACCTGGGGCAGACAGAACAGTGAACAGGGAG----- : 1068  
AOTVOKIR3DS3\*02 : ----- : -  
AOTVOKIR3DS3\*03 : -----ATGCTGCTGTAATGAACCAAGAACCTGGGGCAGACAGAACAGTGAACAGGGAG----- : 1086  
AOTVOKIR3DS3\*03v1 : -----ATGCTGCTGTAATGAACCAAGAACCTGGGGCAGACAGAACAGTGAACAGGGAG----- : 981

**EXON 9**

\* 11340 \* 11360 \* 11380 \* 11400 \* 11420  
BAC\_clone\_Om : GGGGATGGAGTCTTATTCCCTAATAGTCACGTAGAATGTGAGCCCCTCCCTCACTCAACATTTCCCTCTCTCCAGGACTCTGAGGAACAAGACCCT : 11418  
AOTVOKIR3DL1\*01 : -----GACTCTGATGAACAAGACCCT : 1125  
AOTVOKIR2DL1\*01v1 : -----GACTCTGATGAACAAGACCCT : 831  
AOTVOKIR3DS1\*01v2 : -----GACTCTGA----- : 1059  
AOTVOKIR3DS1\*02 : -----GACTCTGA----- : 1059  
AOTVOKIR3DL2\*01 : -----GACTCTGATGAACAAGACCCT : 1125  
AOTVOKIR3DL2\*01v1 : -----GACTCTGATGAACAAGACCCT : 1089  
AOTVOKIR3DL2\*02 : -----GACTCTGATGAACAAGACCCT : 1125  
AOTVOKIR3DS3\*01 : -----GACTCCGAGGAACAAGACCCT : 1089  
AOTVOKIR3DS3\*02 : ----- : -  
AOTVOKIR3DS3\*03 : -----GACTCTGAGGAACAAGACCCT : 1107  
AOTVOKIR3DS3\*03v1 : -----GACTCTGAGGAACAAGACCCT : 1002  
gactctga

\* 11440 \* 11460 \* 11480 \* 11500 \* 11520  
BAC\_clone\_Om : CAGGAGGTGACATAGGCACAGATGGATCACTGCGTTTTTCACACAGAGAAAAATCACTCAGCCTTCTCAGAGGCCCAAGAGAGCCCCAACAGAAACG : 11514  
AOTVOKIR3DL1\*01 : CAGGAGGTGAAATACACACAGTTGAATCATGGCGTTTTTCACACAGAGAAAAATCACTCGCCCATCTCAGAGGCCCAGGAGACTCCCAACAGATACC : 1221  
AOTVOKIR2DL1\*01v1 : CAGGAGGTGAAATACACACAGTTGAATCATGGCGTTTTTCACACAGAGAAAAATCACTCGCCCATCTCAGAGGCCCAGGAGACTCCCAACAGATACC : 927  
AOTVOKIR3DS1\*01v2 : ----- : -  
AOTVOKIR3DS1\*02 : ----- : -  
AOTVOKIR3DL2\*01 : CAGGAGGTGAAATACACACAGTTGAATCATGGCGTTTTTCACACAGAGAAAAATCACTCGCCCATCTCAGAGGCCCAGGAGACTCCCAACAGATACC : 1221  
AOTVOKIR3DL2\*01v1 : CAGGAGGTGAAATACACACAGTTGAATCATGGCGTTTTTCACACAGAGAAAAATCACTCGCCCATCTCAGAGGCCCAGGAGACTCCCAACAGATACC : 1185

```

AOTVOKIR3DL2*02 : CAGGAGGTGAAAATACACACAGTTGAATCATGGCGTTTTTCACACAGAGAAAAATCACTCGCCCATCTCAGAGGCCAGGAGACTCCCAACAGATACC : 1221
AOTVOKIR3DS3*01 : CAGGAGGTGACA----- : 1101
AOTVOKIR3DS3*02 : ----- : -
AOTVOKIR3DS3*03 : CAGGAGGTGACA----- : 1119
AOTVOKIR3DS3*03v1 : CAGGAGGTGACA----- : 1014

```

```

*      11540      *      11560      *      11580      *      11600
BAC_clone_Om : AGTGTGTACATGGAACCTTCTAAATGCTGAGCCTGGATTG----CTGTCTCCTGTCTGTGAACATCATGCACAGGCCTTGA : 11590
AOTVOKIR3DL1*01 : AGTGTGTACATGGAACCTCCCAAATGCGGAGCCCGGATTGAAAGTTGTCTCCTGTCCATGA----- : 1281
AOTVOKIR2DL1*01v1 : AGTGTGTACATGGAACCTCCCAAATGCGGAGCCCGGATTGAAAGTTGTCTCCTGTCCATGA----- : 987
AOTVOKIR3DS1*01v2 : ----- : -
AOTVOKIR3DS1*02 : ----- : -
AOTVOKIR3DL2*01 : AGTGTGTACATGGAACCTCCCAAATGCGGAGCCCGGATTGAAAGTTGTCTCCTGTCCATGA----- : 1281
AOTVOKIR3DL2*01v1 : AGTGTGTACATGGAACCTCCCAAATGCGGAGCCCGGATTGAAAGTTGTCTCCTGTCCATGA----- : 1245
AOTVOKIR3DL2*02 : AGTGTGTACATGGAACCTCCCAAATGCGGAGCCCGGATTGAAAGTTGTCTCCTGTCCATGA----- : 1281
AOTVOKIR3DS3*01 : ----- : -
AOTVOKIR3DS3*02 : ----- : -
AOTVOKIR3DS3*03 : ----- : -
AOTVOKIR3DS3*03v1 : ----- : -

```
