# Supplementary material for: Identification and Diversity of Killer Cell Ig-Like Receptors in Aotus vociferans, a New World Monkey
Source: PubMed Central journal article supplement (PMC3819253; doi:10.1371/journal.pone.0079731), 2013-11-06
Supplement: pone.0079731.s012.pdf [file pone.0079731.s012.pdf]

**EXON 1**

\*                    20                    \*                    40                    \*                    60                    \*                    80                    \*

↓

```

BAC_clone_Om      : ATGGCACTCATGGCTGTCAGCATGGTGTGTGTGGTGTGAGTCCTGGAACGAATCCAGGGGGGGAACCATGGGGTGGAGATATGGGACTGGAATGGA : 95
AOTVOKIR3DL4*01   : ---TCACTCATGGTCATCAGCATGGCGTGTGTGG----- : 31
AOTVOKIR3DL4*02   : ---TCACTCATGGTCATCAGCATGGCGTGTGTGG----- : 31
AOTVOKIR3DL4*02v1 : ---TCACTCATGGTCATCAGCATGGCGTGTGTGG----- : 31
AOTVOKIR3DL4*02v2 : ---TCACTCATGGTCATCAGCATGGCGTGTGTGG----- : 31
AOTVOKIR3DL4*03   : ---TCACTCATGGTCATCAGCATGGCGTGTGTGG----- : 31
AOTVOKIR3DS4*04   : ---TCACTCATGGTCATCAGCATGGCGTGTGTGG----- : 31
AOTVOKIR3DS4*04v1 : ---TCACTCATGGTCATCAGCATGGCGTGTGTGG----- : 31
AOTVOKIR3DS5*01   : ---TCACTCATGGTCATCAGCATGGTGTGTGTGG----- : 31
AOTVOKIR2DS5*01v1 : ---TCACTCATGGTCATCAGCATGGTGTGTGTGG----- : 31
AOTVOKIR2DS5*01v2 : ---TCACTCATGGTCATCAGCATGGTGTGTGTGG----- : 31
AOTVOKIR3DS7*01   : ---TCACTCATGGTCATCAGCATGGCGTGTGTGG----- : 31
AOTVOKIR3DS7*01v1 : ---TCACTCATGGTCATCAGCATGGCGTGTGTGG----- : 31
AOTVOKIR3DL8*01   : ---TCACTCATGGTCATCAGCATGGCGTGTGTGG----- : 31
AOTVOKIR3DL8*01v1 : ---TCACTCATGGTCATCAGCATGGCGTGTGTGG----- : 31
AOTVOKIR3DS8*01v2 : ---TCACTCATGGTCATCAGCATGGCGTGTGTGG----- : 31
AOTVOKIR3DL8*02   : ---TCACTCATGGTCATCAGCATGGCGTGTGTGG----- : 31
AOTVOKIR4DL9*01   : ---TCACTCATGGTCATCAGCATGGCGTGTGTGG----- : 31
AOTVOKIR4DS9*01v1 : ---TCACTCATGGTCATCAGCATGGCGTGTGTGG----- : 31
AOTVOKIR3DL9*01v2 : ---TCACTCATGGTCATCAGCATGGCGTGTGTGG----- : 31
AOTVOKIR4DL9*02   : ---TCACTCATGGTCATCAGCATGGCGTGTGTGG----- : 31
AOTVOKIR4DL10*01  : ---TCACTCATGGTCATCAGCATGGCGTGTGTGG----- : 31
AOTVOKIR3DL10*01v1 : ---TCACTCATGGTCATCAGCATGGCGTGTGTGG----- : 31
AOTVOKIR4DS10*01v2 : ---TCACTCATGGTCATCAGCATGGCGTGTGTGG----- : 31
AOTVOKIR3DS10*01v3 : ---TCACTCATGGTCATCAGCATGGCGTGTGTGG----- : 31
AOTVOKIR3DS10*01v4 : ---TCACTCATGGTCATCAGCATGGCGTGTGTGG----- : 31
tCACTCATGGTcaTCAGCATGGcGTGTGTcG

```

100                    \*                    120                    \*                    140                    \*                    160                    \*                    180                    \*

```

BAC_clone_Om      : GATATGGGCCTGGGGTGGAGATATGGGACTGGAATGGAGGTATGGGGCTGGGGTGGATATATGGGCCTGGGAGATATGGGCCTGGGGTGGAGATA : 190
AOTVOKIR3DL4*01   : ----- : -
AOTVOKIR3DL4*02   : ----- : -
AOTVOKIR3DL4*02v1 : ----- : -
AOTVOKIR3DL4*02v2 : ----- : -
AOTVOKIR3DL4*03   : ----- : -
AOTVOKIR3DS4*04   : ----- : -
AOTVOKIR3DS4*04v1 : ----- : -
AOTVOKIR3DS5*01   : ----- : -
AOTVOKIR2DS5*01v1 : ----- : -
AOTVOKIR2DS5*01v2 : ----- : -
AOTVOKIR3DS7*01   : ----- : -
AOTVOKIR3DS7*01v1 : ----- : -
AOTVOKIR3DL8*01   : ----- : -
AOTVOKIR3DL8*01v1 : ----- : -

```

```

AOTVOKIR3DS8*01v2 : ----- : -
AOTVOKIR3DL8*02   : ----- : -
AOTVOKIR4DL9*01   : ----- : -
AOTVOKIR4DS9*01v1 : ----- : -
AOTVOKIR3DL9*01v2 : ----- : -
AOTVOKIR4DL9*02   : ----- : -
AOTVOKIR4DL10*01  : ----- : -
AOTVOKIR3DL10*01v1 : ----- : -
AOTVOKIR4DS10*01v2 : ----- : -
AOTVOKIR3DS10*01v3 : ----- : -
AOTVOKIR3DS10*01v4 : ----- : -

```

```

                200      *      220      *      240      *      260      *      280
BAC_clone_Om    : TGGGTCTGGAGTGGGGATATGGGCCTGGGGTGGAGATATGGGCCTAGGGTGGAGATATGGGCCTGGAGTGGAGATATGGGCCTGGGGTGGAGATA : 285
AOTVOKIR3DL4*01 : ----- : -
AOTVOKIR3DL4*02 : ----- : -
AOTVOKIR3DL4*02v1 : ----- : -
AOTVOKIR3DL4*02v2 : ----- : -
AOTVOKIR3DL4*03   : ----- : -
AOTVOKIR3DS4*04   : ----- : -
AOTVOKIR3DS4*04v1 : ----- : -
AOTVOKIR3DS5*01   : ----- : -
AOTVOKIR2DS5*01v1 : ----- : -
AOTVOKIR2DS5*01v2 : ----- : -
AOTVOKIR3DS7*01   : ----- : -
AOTVOKIR3DS7*01v1 : ----- : -
AOTVOKIR3DL8*01   : ----- : -
AOTVOKIR3DL8*01v1 : ----- : -
AOTVOKIR3DS8*01v2 : ----- : -
AOTVOKIR3DL8*02   : ----- : -
AOTVOKIR4DL9*01   : ----- : -
AOTVOKIR4DS9*01v1 : ----- : -
AOTVOKIR3DL9*01v2 : ----- : -
AOTVOKIR4DL9*02   : ----- : -
AOTVOKIR4DL10*01  : ----- : -
AOTVOKIR3DL10*01v1 : ----- : -
AOTVOKIR4DS10*01v2 : ----- : -
AOTVOKIR3DS10*01v3 : ----- : -
AOTVOKIR3DS10*01v4 : ----- : -

```

```

                *      300      *      320      *      340      *      360      *      380
BAC_clone_Om    : CGGGCCTGGAGTGGAGATATGGGCCTGGGATGGAGAAATGGACCTGGGGTGGAGATATGGACCTGAGTTAGAGATATGGGCCTGAAGTGGAGATA : 380
AOTVOKIR3DL4*01 : ----- : -
AOTVOKIR3DL4*02 : ----- : -

```

AOTVOKIR3DL4\*02v1 : ----- : -  
 AOTVOKIR3DL4\*02v2 : ----- : -  
 AOTVOKIR3DL4\*03 : ----- : -  
 AOTVOKIR3DS4\*04 : ----- : -  
 AOTVOKIR3DS4\*04v1 : ----- : -  
 AOTVOKIR3DS5\*01 : ----- : -  
 AOTVOKIR2DS5\*01v1 : ----- : -  
 AOTVOKIR2DS5\*01v2 : ----- : -  
 AOTVOKIR3DS7\*01 : ----- : -  
 AOTVOKIR3DS7\*01v1 : ----- : -  
 AOTVOKIR3DL8\*01 : ----- : -  
 AOTVOKIR3DL8\*01v1 : ----- : -  
 AOTVOKIR3DS8\*01v2 : ----- : -  
 AOTVOKIR3DL8\*02 : ----- : -  
 AOTVOKIR4DL9\*01 : ----- : -  
 AOTVOKIR4DS9\*01v1 : ----- : -  
 AOTVOKIR3DL9\*01v2 : ----- : -  
 AOTVOKIR4DL9\*02 : ----- : -  
 AOTVOKIR4DL10\*01 : ----- : -  
 AOTVOKIR3DL10\*01v1 : ----- : -  
 AOTVOKIR4DS10\*01v2 : ----- : -  
 AOTVOKIR3DS10\*01v3 : ----- : -  
 AOTVOKIR3DS10\*01v4 : ----- : -

\*                    400                    \*                    420                    \*                    440                    \*                    460                    \*

BAC\_clone\_Om : TGGGCCTGGGGTGGAGATATGGGCCTGGGAGATATGGGCCTGGAGTGGAGATATGGGCCTGCAGTGGGAATATGGGACTGGGGTGGGGATATGGG : 475  
 AOTVOKIR3DL4\*01 : ----- : -  
 AOTVOKIR3DL4\*02 : ----- : -  
 AOTVOKIR3DL4\*02v1 : ----- : -  
 AOTVOKIR3DL4\*02v2 : ----- : -  
 AOTVOKIR3DL4\*03 : ----- : -  
 AOTVOKIR3DS4\*04 : ----- : -  
 AOTVOKIR3DS4\*04v1 : ----- : -  
 AOTVOKIR3DS5\*01 : ----- : -  
 AOTVOKIR2DS5\*01v1 : ----- : -  
 AOTVOKIR2DS5\*01v2 : ----- : -  
 AOTVOKIR3DS7\*01 : ----- : -  
 AOTVOKIR3DS7\*01v1 : ----- : -  
 AOTVOKIR3DL8\*01 : ----- : -  
 AOTVOKIR3DL8\*01v1 : ----- : -  
 AOTVOKIR3DS8\*01v2 : ----- : -  
 AOTVOKIR3DL8\*02 : ----- : -  
 AOTVOKIR4DL9\*01 : ----- : -  
 AOTVOKIR4DS9\*01v1 : ----- : -  
 AOTVOKIR3DL9\*01v2 : ----- : -

AOTVOKIR4DL9\*02 : ----- : -  
AOTVOKIR4DL10\*01 : ----- : -  
AOTVOKIR3DL10\*01v1 : ----- : -  
AOTVOKIR4DS10\*01v2 : ----- : -  
AOTVOKIR3DS10\*01v3 : ----- : -  
AOTVOKIR3DS10\*01v4 : ----- : -

480 \* 500 \* 520 \* 540 \* 560 \*  
BAC\_clone\_Om : CCTGCCGTGGAGATATGGGCCTGCGGTGGGGATATGGGGCTGGGGTGGAGATATGGGCTTGCAGTGGGGATATGGGCCTGGTGTGGAGATATGGG : 570  
AOTVOKIR3DL4\*01 : ----- : -  
AOTVOKIR3DL4\*02 : ----- : -  
AOTVOKIR3DL4\*02v1 : ----- : -  
AOTVOKIR3DL4\*02v2 : ----- : -  
AOTVOKIR3DL4\*03 : ----- : -  
AOTVOKIR3DS4\*04 : ----- : -  
AOTVOKIR3DS4\*04v1 : ----- : -  
AOTVOKIR3DS5\*01 : ----- : -  
AOTVOKIR2DS5\*01v1 : ----- : -  
AOTVOKIR2DS5\*01v2 : ----- : -  
AOTVOKIR3DS7\*01 : ----- : -  
AOTVOKIR3DS7\*01v1 : ----- : -  
AOTVOKIR3DL8\*01 : ----- : -  
AOTVOKIR3DL8\*01v1 : ----- : -  
AOTVOKIR3DS8\*01v2 : ----- : -  
AOTVOKIR3DL8\*02 : ----- : -  
AOTVOKIR4DL9\*01 : ----- : -  
AOTVOKIR4DS9\*01v1 : ----- : -  
AOTVOKIR3DL9\*01v2 : ----- : -  
AOTVOKIR4DL9\*02 : ----- : -  
AOTVOKIR4DL10\*01 : ----- : -  
AOTVOKIR3DL10\*01v1 : ----- : -  
AOTVOKIR4DS10\*01v2 : ----- : -  
AOTVOKIR3DS10\*01v3 : ----- : -  
AOTVOKIR3DS10\*01v4 : ----- : -

580 \* 600 \* 620 \* 640 \* 660 \*  
BAC\_clone\_Om : CCTGGAAGATATGGGCCTACAGTGGGGATATCGGACTGCGGTGGGGATATGGGCCTGGGGTGGAGATATGGGCCTGTGGTGGGGATATGGGCCTG : 665  
AOTVOKIR3DL4\*01 : ----- : -  
AOTVOKIR3DL4\*02 : ----- : -  
AOTVOKIR3DL4\*02v1 : ----- : -  
AOTVOKIR3DL4\*02v2 : ----- : -  
AOTVOKIR3DL4\*03 : ----- : -  
AOTVOKIR3DS4\*04 : ----- : -  
AOTVOKIR3DS4\*04v1 : ----- : -

```

AOTVOKIR3DS5*01      : ----- : -
AOTVOKIR2DS5*01v1   : ----- : -
AOTVOKIR2DS5*01v2   : ----- : -
AOTVOKIR3DS7*01     : ----- : -
AOTVOKIR3DS7*01v1   : ----- : -
AOTVOKIR3DL8*01     : ----- : -
AOTVOKIR3DL8*01v1   : ----- : -
AOTVOKIR3DS8*01v2   : ----- : -
AOTVOKIR3DL8*02     : ----- : -
AOTVOKIR4DL9*01     : ----- : -
AOTVOKIR4DS9*01v1   : ----- : -
AOTVOKIR3DL9*01v2   : ----- : -
AOTVOKIR4DL9*02     : ----- : -
AOTVOKIR4DL10*01    : ----- : -
AOTVOKIR3DL10*01v1  : ----- : -
AOTVOKIR4DS10*01v2  : ----- : -
AOTVOKIR3DS10*01v3  : ----- : -
AOTVOKIR3DS10*01v4  : ----- : -

```

```

          *      680          *      700          *      720          *      740          *      760
BAC_clone_Om      : GTGTGGAGATATGGGCCTGGAAGATATGGGCCTACAGTGGGGATATGGGACTGGGGTGGGGATATGGGACTGGGGTGGAGATATGGGCCTGTGGT : 760
AOTVOKIR3DL4*01   : ----- : -
AOTVOKIR3DL4*02   : ----- : -
AOTVOKIR3DL4*02v1 : ----- : -
AOTVOKIR3DL4*02v2 : ----- : -
AOTVOKIR3DL4*03   : ----- : -
AOTVOKIR3DS4*04   : ----- : -
AOTVOKIR3DS4*04v1 : ----- : -
AOTVOKIR3DS5*01   : ----- : -
AOTVOKIR2DS5*01v1 : ----- : -
AOTVOKIR2DS5*01v2 : ----- : -
AOTVOKIR3DS7*01   : ----- : -
AOTVOKIR3DS7*01v1 : ----- : -
AOTVOKIR3DL8*01   : ----- : -
AOTVOKIR3DL8*01v1 : ----- : -
AOTVOKIR3DS8*01v2 : ----- : -
AOTVOKIR3DL8*02   : ----- : -
AOTVOKIR4DL9*01   : ----- : -
AOTVOKIR4DS9*01v1 : ----- : -
AOTVOKIR3DL9*01v2 : ----- : -
AOTVOKIR4DL9*02   : ----- : -
AOTVOKIR4DL10*01  : ----- : -
AOTVOKIR3DL10*01v1 : ----- : -
AOTVOKIR4DS10*01v2 : ----- : -
AOTVOKIR3DS10*01v3 : ----- : -

```

```

AOTVOKIR3DS10*01v4 : ----- : -

                *       780           *       800           *       820           *       840           *
BAC_clone_Om       : GGGGATATGGGCCTGGTGTGGAGATATGGGCCTGGAAGATATGGGCCTACAGTGGGGATATGGGACTGGGGTGGAGATATGGGACTGGAGTGGAG : 855
AOTVOKIR3DL4*01   : ----- : -
AOTVOKIR3DL4*02   : ----- : -
AOTVOKIR3DL4*02v1 : ----- : -
AOTVOKIR3DL4*02v2 : ----- : -
AOTVOKIR3DL4*03   : ----- : -
AOTVOKIR3DS4*04   : ----- : -
AOTVOKIR3DS4*04v1 : ----- : -
AOTVOKIR3DS5*01   : ----- : -
AOTVOKIR2DS5*01v1 : ----- : -
AOTVOKIR2DS5*01v2 : ----- : -
AOTVOKIR3DS7*01   : ----- : -
AOTVOKIR3DS7*01v1 : ----- : -
AOTVOKIR3DL8*01   : ----- : -
AOTVOKIR3DL8*01v1 : ----- : -
AOTVOKIR3DS8*01v2 : ----- : -
AOTVOKIR3DL8*02   : ----- : -
AOTVOKIR4DL9*01   : ----- : -
AOTVOKIR4DS9*01v1 : ----- : -
AOTVOKIR3DL9*01v2 : ----- : -
AOTVOKIR4DL9*02   : ----- : -
AOTVOKIR4DL10*01  : ----- : -
AOTVOKIR3DL10*01v1 : ----- : -
AOTVOKIR4DS10*01v2 : ----- : -
AOTVOKIR3DS10*01v3 : ----- : -
AOTVOKIR3DS10*01v4 : ----- : -

                860           *       880           *       900           *       920           *       940           *
BAC_clone_Om       : ATATGGTCCTGGGGTGCAGATATGATCCTGGGGTGGAGATATGGTCCTGGGGTGGGGCTATGGGCCTGGGGTGGCAATATGGGCCTGTGGTGGAG : 950
AOTVOKIR3DL4*01   : ----- : -
AOTVOKIR3DL4*02   : ----- : -
AOTVOKIR3DL4*02v1 : ----- : -
AOTVOKIR3DL4*02v2 : ----- : -
AOTVOKIR3DL4*03   : ----- : -
AOTVOKIR3DS4*04   : ----- : -
AOTVOKIR3DS4*04v1 : ----- : -
AOTVOKIR3DS5*01   : ----- : -
AOTVOKIR2DS5*01v1 : ----- : -
AOTVOKIR2DS5*01v2 : ----- : -
AOTVOKIR3DS7*01   : ----- : -
AOTVOKIR3DS7*01v1 : ----- : -

```

```

AOTVOKIR3DL8*01      : ----- : -
AOTVOKIR3DL8*01v1    : ----- : -
AOTVOKIR3DS8*01v2    : ----- : -
AOTVOKIR3DL8*02      : ----- : -
AOTVOKIR4DL9*01      : ----- : -
AOTVOKIR4DS9*01v1    : ----- : -
AOTVOKIR3DL9*01v2    : ----- : -
AOTVOKIR4DL9*02      : ----- : -
AOTVOKIR4DL10*01     : ----- : -
AOTVOKIR3DL10*01v1   : ----- : -
AOTVOKIR4DS10*01v2   : ----- : -
AOTVOKIR3DS10*01v3   : ----- : -
AOTVOKIR3DS10*01v4   : ----- : -

```

```

          960          *          980          *          1000          *          1020          *          1040
BAC_clone_Om      : ATATGGGACTGGGGTGGAGATATGGGCCTGTGGTGGGGATATGGGACTGGGGTGGGGTTATGGGCTTGGGGTGGAGATATGGGCCTGGGAGATAT : 1045
AOTVOKIR3DL4*01   : ----- : -
AOTVOKIR3DL4*02   : ----- : -
AOTVOKIR3DL4*02v1 : ----- : -
AOTVOKIR3DL4*02v2 : ----- : -
AOTVOKIR3DL4*03   : ----- : -
AOTVOKIR3DS4*04   : ----- : -
AOTVOKIR3DS4*04v1 : ----- : -
AOTVOKIR3DS5*01   : ----- : -
AOTVOKIR2DS5*01v1 : ----- : -
AOTVOKIR2DS5*01v2 : ----- : -
AOTVOKIR3DS7*01   : ----- : -
AOTVOKIR3DS7*01v1 : ----- : -
AOTVOKIR3DL8*01   : ----- : -
AOTVOKIR3DL8*01v1 : ----- : -
AOTVOKIR3DS8*01v2 : ----- : -
AOTVOKIR3DL8*02   : ----- : -
AOTVOKIR4DL9*01   : ----- : -
AOTVOKIR4DS9*01v1 : ----- : -
AOTVOKIR3DL9*01v2 : ----- : -
AOTVOKIR4DL9*02   : ----- : -
AOTVOKIR4DL10*01  : ----- : -
AOTVOKIR3DL10*01v1 : ----- : -
AOTVOKIR4DS10*01v2 : ----- : -
AOTVOKIR3DS10*01v3 : ----- : -
AOTVOKIR3DS10*01v4 : ----- : -

```

```

          *          1060          *          1080          *          1100          *          1120          *          1140
BAC_clone_Om      : GGGCCTGAGGTGGAGATTTGGGCCTGGAATGGAGATATGGGCCTGAGGTGGAGATACTGGCCTGGGATATATGGTCCTAGGGTGGAGATATGGTC : 1140

```

```

AOTVOKIR3DL4*01 : ----- : -
AOTVOKIR3DL4*02 : ----- : -
AOTVOKIR3DL4*02v1 : ----- : -
AOTVOKIR3DL4*02v2 : ----- : -
AOTVOKIR3DL4*03 : ----- : -
AOTVOKIR3DS4*04 : ----- : -
AOTVOKIR3DS4*04v1 : ----- : -
AOTVOKIR3DS5*01 : ----- : -
AOTVOKIR2DS5*01v1 : ----- : -
AOTVOKIR2DS5*01v2 : ----- : -
AOTVOKIR3DS7*01 : ----- : -
AOTVOKIR3DS7*01v1 : ----- : -
AOTVOKIR3DL8*01 : ----- : -
AOTVOKIR3DL8*01v1 : ----- : -
AOTVOKIR3DS8*01v2 : ----- : -
AOTVOKIR3DL8*02 : ----- : -
AOTVOKIR4DL9*01 : ----- : -
AOTVOKIR4DS9*01v1 : ----- : -
AOTVOKIR3DL9*01v2 : ----- : -
AOTVOKIR4DL9*02 : ----- : -
AOTVOKIR4DL10*01 : ----- : -
AOTVOKIR3DL10*01v1 : ----- : -
AOTVOKIR4DS10*01v2 : ----- : -
AOTVOKIR3DS10*01v3 : ----- : -
AOTVOKIR3DS10*01v4 : ----- : -

```

```

          *      1160          *      1180          *      1200          *      1220          *
BAC_clone_Om : CTGGGGTGGAGATATGGGCCTGGGGTGGAGATATGGGCCTGTGGTGGGGATATGGGAATGGGGTGGGGATATGGGACTAGGGTTGGGATATGGGA : 1235
AOTVOKIR3DL4*01 : ----- : -
AOTVOKIR3DL4*02 : ----- : -
AOTVOKIR3DL4*02v1 : ----- : -
AOTVOKIR3DL4*02v2 : ----- : -
AOTVOKIR3DL4*03 : ----- : -
AOTVOKIR3DS4*04 : ----- : -
AOTVOKIR3DS4*04v1 : ----- : -
AOTVOKIR3DS5*01 : ----- : -
AOTVOKIR2DS5*01v1 : ----- : -
AOTVOKIR2DS5*01v2 : ----- : -
AOTVOKIR3DS7*01 : ----- : -
AOTVOKIR3DS7*01v1 : ----- : -
AOTVOKIR3DL8*01 : ----- : -
AOTVOKIR3DL8*01v1 : ----- : -
AOTVOKIR3DS8*01v2 : ----- : -
AOTVOKIR3DL8*02 : ----- : -
AOTVOKIR4DL9*01 : ----- : -

```



```

AOTVOKIR4DS9*01v1 : ----- : -
AOTVOKIR3DL9*01v2 : ----- : -
AOTVOKIR4DL9*02   : ----- : -
AOTVOKIR4DL10*01  : ----- : -
AOTVOKIR3DL10*01v1 : ----- : -
AOTVOKIR4DS10*01v2 : ----- : -
AOTVOKIR3DS10*01v3 : ----- : -
AOTVOKIR3DS10*01v4 : ----- : -

```

```

          1240      *      1260      *      1280      *      1300      *      1320      *
BAC_clone_Om   : CTGGGGTCTGGTTATGGGCCTGGGGTAGAGATATGGGCCTGGGGTATAGATATGGGCCTGGGGTGGAAATATGGGCCTCTGGTGAGATATGGGCC : 1330
AOTVOKIR3DL4*01 : ----- : -
AOTVOKIR3DL4*02 : ----- : -
AOTVOKIR3DL4*02v1 : ----- : -
AOTVOKIR3DL4*02v2 : ----- : -
AOTVOKIR3DL4*03   : ----- : -
AOTVOKIR3DS4*04   : ----- : -
AOTVOKIR3DS4*04v1 : ----- : -
AOTVOKIR3DS5*01   : ----- : -
AOTVOKIR2DS5*01v1 : ----- : -
AOTVOKIR2DS5*01v2 : ----- : -
AOTVOKIR3DS7*01   : ----- : -
AOTVOKIR3DS7*01v1 : ----- : -
AOTVOKIR3DL8*01   : ----- : -
AOTVOKIR3DL8*01v1 : ----- : -
AOTVOKIR3DS8*01v2 : ----- : -
AOTVOKIR3DL8*02   : ----- : -
AOTVOKIR4DL9*01   : ----- : -
AOTVOKIR4DS9*01v1 : ----- : -
AOTVOKIR3DL9*01v2 : ----- : -
AOTVOKIR4DL9*02   : ----- : -
AOTVOKIR4DL10*01  : ----- : -
AOTVOKIR3DL10*01v1 : ----- : -
AOTVOKIR4DS10*01v2 : ----- : -
AOTVOKIR3DS10*01v3 : ----- : -
AOTVOKIR3DS10*01v4 : ----- : -

```

```

          1340      *      1360      *      1380      *      1400      *      1420
BAC_clone_Om   : TGGGATGTAGATATGGGCCTGGGGTGGAGATATGGGCCTGTGGTGGGTATATGGGACTTGGGTGGGGATATGGGCCTGGGGTGGAGATATGGGCC : 1425
AOTVOKIR3DL4*01 : ----- : -
AOTVOKIR3DL4*02 : ----- : -
AOTVOKIR3DL4*02v1 : ----- : -
AOTVOKIR3DL4*02v2 : ----- : -
AOTVOKIR3DL4*03   : ----- : -

```

```

AOTVOKIR3DS4*04      : ----- : -
AOTVOKIR3DS4*04v1    : ----- : -
AOTVOKIR3DS5*01      : ----- : -
AOTVOKIR2DS5*01v1    : ----- : -
AOTVOKIR2DS5*01v2    : ----- : -
AOTVOKIR3DS7*01      : ----- : -
AOTVOKIR3DS7*01v1    : ----- : -
AOTVOKIR3DL8*01      : ----- : -
AOTVOKIR3DL8*01v1    : ----- : -
AOTVOKIR3DS8*01v2    : ----- : -
AOTVOKIR3DL8*02      : ----- : -
AOTVOKIR4DL9*01      : ----- : -
AOTVOKIR4DS9*01v1    : ----- : -
AOTVOKIR3DL9*01v2    : ----- : -
AOTVOKIR4DL9*02      : ----- : -
AOTVOKIR4DL10*01     : ----- : -
AOTVOKIR3DL10*01v1   : ----- : -
AOTVOKIR4DS10*01v2   : ----- : -
AOTVOKIR3DS10*01v3   : ----- : -
AOTVOKIR3DS10*01v4   : ----- : -

```

```

          *      1440          *      1460          *      1480          *      1500          *      1520
BAC_clone_Om      : TGGGGTAGAGATATTGCCTCTAGTGGAGATAAGAGCCTCGAGGTATAGACCTGGGCCTGGAGGCTGGGACTCTGCACAGCCAAGAGCCCTGTTGT : 1520
AOTVOKIR3DL4*01   : ----- : -
AOTVOKIR3DL4*02   : ----- : -
AOTVOKIR3DL4*02v1 : ----- : -
AOTVOKIR3DL4*02v2 : ----- : -
AOTVOKIR3DL4*03   : ----- : -
AOTVOKIR3DS4*04   : ----- : -
AOTVOKIR3DS4*04v1 : ----- : -
AOTVOKIR3DS5*01   : ----- : -
AOTVOKIR2DS5*01v1 : ----- : -
AOTVOKIR2DS5*01v2 : ----- : -
AOTVOKIR3DS7*01   : ----- : -
AOTVOKIR3DS7*01v1 : ----- : -
AOTVOKIR3DL8*01   : ----- : -
AOTVOKIR3DL8*01v1 : ----- : -
AOTVOKIR3DS8*01v2 : ----- : -
AOTVOKIR3DL8*02   : ----- : -
AOTVOKIR4DL9*01   : ----- : -
AOTVOKIR4DS9*01v1 : ----- : -
AOTVOKIR3DL9*01v2 : ----- : -
AOTVOKIR4DL9*02   : ----- : -
AOTVOKIR4DL10*01  : ----- : -
AOTVOKIR3DL10*01v1 : ----- : -

```

```

AOTVOKIR4DS10*01v2 : ----- : -
AOTVOKIR3DS10*01v3 : ----- : -
AOTVOKIR3DS10*01v4 : ----- : -

```

```

      *      1540      *      1560      *      1580      *      1600      *
BAC_clone_Om      : TGGGGTCAGGTGAGCAACGAGGCTGAGTTTACCTTCAACCTAAAAAGGGCTTGGCTCTCAAGGCACACAGCCCATTTGGGGCAGCAGGGCAGGGC : 1615
AOTVOKIR3DL4*01   : ----- : -
AOTVOKIR3DL4*02   : ----- : -
AOTVOKIR3DL4*02v1 : ----- : -
AOTVOKIR3DL4*02v2 : ----- : -
AOTVOKIR3DL4*03   : ----- : -
AOTVOKIR3DS4*04   : ----- : -
AOTVOKIR3DS4*04v1 : ----- : -
AOTVOKIR3DS5*01   : ----- : -
AOTVOKIR2DS5*01v1 : ----- : -
AOTVOKIR2DS5*01v2 : ----- : -
AOTVOKIR3DS7*01   : ----- : -
AOTVOKIR3DS7*01v1 : ----- : -
AOTVOKIR3DL8*01   : ----- : -
AOTVOKIR3DL8*01v1 : ----- : -
AOTVOKIR3DS8*01v2 : ----- : -
AOTVOKIR3DL8*02   : ----- : -
AOTVOKIR4DL9*01   : ----- : -
AOTVOKIR4DS9*01v1 : ----- : -
AOTVOKIR3DL9*01v2 : ----- : -
AOTVOKIR4DL9*02   : ----- : -
AOTVOKIR4DL10*01  : ----- : -
AOTVOKIR3DL10*01v1 : ----- : -
AOTVOKIR4DS10*01v2 : ----- : -
AOTVOKIR3DS10*01v3 : ----- : -
AOTVOKIR3DS10*01v4 : ----- : -

```

```

                                     EXON 2
                                1620      *      1640      *      1660      *      1680      *      1700      *
BAC_clone_Om      : TGGTTTATGTGCAGCTGGATTGTCCATCATGATCTTTCTTTCCAGGGTTCTTCTTGGTCCAGAGGGCCTGGTACACGTGAGGTGAGTCCTTCCCC : 1710
AOTVOKIR3DL4*01   : ----- : 67
AOTVOKIR3DL4*02   : ----- : 67
AOTVOKIR3DL4*02v1 : ----- : -
AOTVOKIR3DL4*02v2 : ----- : 67
AOTVOKIR3DL4*03   : ----- : 67
AOTVOKIR3DS4*04   : ----- : 67
AOTVOKIR3DS4*04v1 : ----- : 67
AOTVOKIR3DS5*01   : ----- : 67
AOTVOKIR2DS5*01v1 : ----- : 67
AOTVOKIR2DS5*01v2 : ----- : 67

```

```

AOTVOKIR3DS7*01      : -----GGTTCTTCTTGGTCCAGAGAGCCTGGCCACACGGGG----- : 67
AOTVOKIR3DS7*01v1    : -----GGTTCTTCTTGGTCCAGAGAGCCTGGCCACACGGGG----- : 67
AOTVOKIR3DL8*01      : -----GGTTCTTCTTGGTCCAGAGGGCCTGGCCACATGAGG----- : 67
AOTVOKIR3DL8*01v1    : -----GGTTCTTCTTGGTCCAGAGGGCCTGGCCACATGAGG----- : 67
AOTVOKIR3DS8*01v2    : -----GGTTCTTCTTGGTCCAGAGGGCCTGGCCACATGAGG----- : 67
AOTVOKIR3DL8*02      : -----GGTTCTTCTTGGTCCAGAGGGCCTGGCCACATGAGG----- : 67
AOTVOKIR4DL9*01      : -----GGTTCTTCTTGGTCCAGAGGGCCTGGCCACACGGGG----- : 67
AOTVOKIR4DS9*01v1    : -----GGTTCTTCTTGGTCCAGAGGGCCTGGCCACACGGGG----- : 67
AOTVOKIR3DL9*01v2    : -----GGTTCTTCTTGGTCCAGAGGGCCTGGCCACACGGGG----- : 67
AOTVOKIR4DL9*02      : -----GGTTCTTCTTGGTCCAGAGGGCCTGGCCACACGGGG----- : 67
AOTVOKIR4DL10*01     : -----GGTTCTTCTTGGTCCAGAGGGCCTGGTCACGTGAGG----- : 67
AOTVOKIR3DL10*01v1   : -----GGTTCTTCTTGGTCCAGAGGGCCTGGTCACGTGAGG----- : 67
AOTVOKIR4DS10*01v2   : -----GGTTCTTCTTGGTCCAGAGGGCCTGGTCACGTGAGG----- : 67
AOTVOKIR3DS10*01v3   : -----GGTTCTTCTTGGTCCAGAGGGCCTGGTCACGTGAGG----- : 67
AOTVOKIR3DS10*01v4   : -----GGTTCTTCTTGGTCCAGAGGGCCTGGTCACGTGAGG----- : 67

```

ggttcttcttgggtccagagggcctgg cac g gg

```

          1720          *          1740          *          1760          *          1780          *          1800
BAC_clone_Om      : AAACCTTAGGGTGTTCATCTTCCCTACATAAGGGGGTTTCCTGAAACAGAAGAAAAATCCTGTGGGGGCGTCTCTCATAAACTAGGAAGAGGGGACC : 1805
AOTVOKIR3DL4*01    : ----- : -
AOTVOKIR3DL4*02    : ----- : -
AOTVOKIR3DL4*02v1  : ----- : -
AOTVOKIR3DL4*02v2  : ----- : -
AOTVOKIR3DL4*03    : ----- : -
AOTVOKIR3DS4*04    : ----- : -
AOTVOKIR3DS4*04v1  : ----- : -
AOTVOKIR3DS5*01    : ----- : -
AOTVOKIR2DS5*01v1  : ----- : -
AOTVOKIR2DS5*01v2  : ----- : -
AOTVOKIR3DS7*01    : ----- : -
AOTVOKIR3DS7*01v1  : ----- : -
AOTVOKIR3DL8*01    : ----- : -
AOTVOKIR3DL8*01v1  : ----- : -
AOTVOKIR3DS8*01v2  : ----- : -
AOTVOKIR3DL8*02    : ----- : -
AOTVOKIR4DL9*01    : ----- : -
AOTVOKIR4DS9*01v1  : ----- : -
AOTVOKIR3DL9*01v2  : ----- : -
AOTVOKIR4DL9*02    : ----- : -
AOTVOKIR4DL10*01   : ----- : -
AOTVOKIR3DL10*01v1 : ----- : -
AOTVOKIR4DS10*01v2 : ----- : -
AOTVOKIR3DS10*01v3 : ----- : -
AOTVOKIR3DS10*01v4 : ----- : -

```

|                    |   |                                                                                                  |   |      |   |      |   |      |   |      |   |      |
|--------------------|---|--------------------------------------------------------------------------------------------------|---|------|---|------|---|------|---|------|---|------|
|                    | * | 1820                                                                                             | * | 1840 | * | 1860 | * | 1880 | * | 1900 |   |      |
| BAC_clone_Om       | : | CTGGGATGCTCGGCCCACAGTTCTGACCTAGCCCTTCCCAGCCTTCCCTTCCCTTGGCTGAGTCAAGCTCTGTGGGGACCGGGGTGAGACTGGGGT |   |      |   |      |   |      |   |      | : | 1900 |
| AOTVOKIR3DL4*01    | : | -----                                                                                            |   |      |   |      |   |      |   |      | : | -    |
| AOTVOKIR3DL4*02    | : | -----                                                                                            |   |      |   |      |   |      |   |      | : | -    |
| AOTVOKIR3DL4*02v1  | : | -----                                                                                            |   |      |   |      |   |      |   |      | : | -    |
| AOTVOKIR3DL4*02v2  | : | -----                                                                                            |   |      |   |      |   |      |   |      | : | -    |
| AOTVOKIR3DL4*03    | : | -----                                                                                            |   |      |   |      |   |      |   |      | : | -    |
| AOTVOKIR3DS4*04    | : | -----                                                                                            |   |      |   |      |   |      |   |      | : | -    |
| AOTVOKIR3DS4*04v1  | : | -----                                                                                            |   |      |   |      |   |      |   |      | : | -    |
| AOTVOKIR3DS5*01    | : | -----                                                                                            |   |      |   |      |   |      |   |      | : | -    |
| AOTVOKIR2DS5*01v1  | : | -----                                                                                            |   |      |   |      |   |      |   |      | : | -    |
| AOTVOKIR2DS5*01v2  | : | -----                                                                                            |   |      |   |      |   |      |   |      | : | -    |
| AOTVOKIR3DS7*01    | : | -----                                                                                            |   |      |   |      |   |      |   |      | : | -    |
| AOTVOKIR3DS7*01v1  | : | -----                                                                                            |   |      |   |      |   |      |   |      | : | -    |
| AOTVOKIR3DL8*01    | : | -----                                                                                            |   |      |   |      |   |      |   |      | : | -    |
| AOTVOKIR3DL8*01v1  | : | -----                                                                                            |   |      |   |      |   |      |   |      | : | -    |
| AOTVOKIR3DS8*01v2  | : | -----                                                                                            |   |      |   |      |   |      |   |      | : | -    |
| AOTVOKIR3DL8*02    | : | -----                                                                                            |   |      |   |      |   |      |   |      | : | -    |
| AOTVOKIR4DL9*01    | : | -----                                                                                            |   |      |   |      |   |      |   |      | : | -    |
| AOTVOKIR4DS9*01v1  | : | -----                                                                                            |   |      |   |      |   |      |   |      | : | -    |
| AOTVOKIR3DL9*01v2  | : | -----                                                                                            |   |      |   |      |   |      |   |      | : | -    |
| AOTVOKIR4DL9*02    | : | -----                                                                                            |   |      |   |      |   |      |   |      | : | -    |
| AOTVOKIR4DL10*01   | : | -----                                                                                            |   |      |   |      |   |      |   |      | : | -    |
| AOTVOKIR3DL10*01v1 | : | -----                                                                                            |   |      |   |      |   |      |   |      | : | -    |
| AOTVOKIR4DS10*01v2 | : | -----                                                                                            |   |      |   |      |   |      |   |      | : | -    |
| AOTVOKIR3DS10*01v3 | : | -----                                                                                            |   |      |   |      |   |      |   |      | : | -    |
| AOTVOKIR3DS10*01v4 | : | -----                                                                                            |   |      |   |      |   |      |   |      | : | -    |

|                   |   |                                                                                                 |   |      |   |      |   |      |   |  |   |      |
|-------------------|---|-------------------------------------------------------------------------------------------------|---|------|---|------|---|------|---|--|---|------|
|                   | * | 1920                                                                                            | * | 1940 | * | 1960 | * | 1980 | * |  |   |      |
| BAC_clone_Om      | : | GCTCCAAGCTGGGGTGTGAGGGGAGGAAGGGGTGTACCAGCAGAGGAAGGGAGGGGAAGCAGTGCTAGGAAAGGCCGACCCTCTGAGGACAAAGG |   |      |   |      |   |      |   |  | : | 1995 |
| AOTVOKIR3DL4*01   | : | -----                                                                                           |   |      |   |      |   |      |   |  | : | -    |
| AOTVOKIR3DL4*02   | : | -----                                                                                           |   |      |   |      |   |      |   |  | : | -    |
| AOTVOKIR3DL4*02v1 | : | -----                                                                                           |   |      |   |      |   |      |   |  | : | -    |
| AOTVOKIR3DL4*02v2 | : | -----                                                                                           |   |      |   |      |   |      |   |  | : | -    |
| AOTVOKIR3DL4*03   | : | -----                                                                                           |   |      |   |      |   |      |   |  | : | -    |
| AOTVOKIR3DS4*04   | : | -----                                                                                           |   |      |   |      |   |      |   |  | : | -    |
| AOTVOKIR3DS4*04v1 | : | -----                                                                                           |   |      |   |      |   |      |   |  | : | -    |
| AOTVOKIR3DS5*01   | : | -----                                                                                           |   |      |   |      |   |      |   |  | : | -    |
| AOTVOKIR2DS5*01v1 | : | -----                                                                                           |   |      |   |      |   |      |   |  | : | -    |
| AOTVOKIR2DS5*01v2 | : | -----                                                                                           |   |      |   |      |   |      |   |  | : | -    |
| AOTVOKIR3DS7*01   | : | -----                                                                                           |   |      |   |      |   |      |   |  | : | -    |
| AOTVOKIR3DS7*01v1 | : | -----                                                                                           |   |      |   |      |   |      |   |  | : | -    |
| AOTVOKIR3DL8*01   | : | -----                                                                                           |   |      |   |      |   |      |   |  | : | -    |
| AOTVOKIR3DL8*01v1 | : | -----                                                                                           |   |      |   |      |   |      |   |  | : | -    |
| AOTVOKIR3DS8*01v2 | : | -----                                                                                           |   |      |   |      |   |      |   |  | : | -    |

AOTVOKIR3DL8\*02 : ----- : -  
AOTVOKIR4DL9\*01 : ----- : -  
AOTVOKIR4DS9\*01v1 : ----- : -  
AOTVOKIR3DL9\*01v2 : ----- : -  
AOTVOKIR4DL9\*02 : ----- : -  
AOTVOKIR4DL10\*01 : ----- : -  
AOTVOKIR3DL10\*01v1 : ----- : -  
AOTVOKIR4DS10\*01v2 : ----- : -  
AOTVOKIR3DS10\*01v3 : ----- : -  
AOTVOKIR3DS10\*01v4 : ----- : -

2000 \* 2020 \* 2040 \* 2060 \* 2080 \*  
BAC\_clone\_Om : TGTAACCTCACACCCTCCAGCGTTTTCCATGACGGTAGGGGCTGCCGTGTGACTGCTGTCATTCTACCAGGAGAGGTGGGGGGACCACAGCCGTGAG : 2090  
AOTVOKIR3DL4\*01 : ----- : -  
AOTVOKIR3DL4\*02 : ----- : -  
AOTVOKIR3DL4\*02v1 : ----- : -  
AOTVOKIR3DL4\*02v2 : ----- : -  
AOTVOKIR3DL4\*03 : ----- : -  
AOTVOKIR3DS4\*04 : ----- : -  
AOTVOKIR3DS4\*04v1 : ----- : -  
AOTVOKIR3DS5\*01 : ----- : -  
AOTVOKIR2DS5\*01v1 : ----- : -  
AOTVOKIR2DS5\*01v2 : ----- : -  
AOTVOKIR3DS7\*01 : ----- : -  
AOTVOKIR3DS7\*01v1 : ----- : -  
AOTVOKIR3DL8\*01 : ----- : -  
AOTVOKIR3DL8\*01v1 : ----- : -  
AOTVOKIR3DS8\*01v2 : ----- : -  
AOTVOKIR3DL8\*02 : ----- : -  
AOTVOKIR4DL9\*01 : ----- : -  
AOTVOKIR4DS9\*01v1 : ----- : -  
AOTVOKIR3DL9\*01v2 : ----- : -  
AOTVOKIR4DL9\*02 : ----- : -  
AOTVOKIR4DL10\*01 : ----- : -  
AOTVOKIR3DL10\*01v1 : ----- : -  
AOTVOKIR4DS10\*01v2 : ----- : -  
AOTVOKIR3DS10\*01v3 : ----- : -  
AOTVOKIR3DS10\*01v4 : ----- : -

2100 \* 2120 \* 2140 \* 2160 \* 2180 \*  
BAC\_clone\_Om : CTTTACATTCTAAATCCTCTGATGGGGGCTCAGTTGTTTTATTGTGGTTCACGCAGTGGCTGATACTCCATTCCAAAGGACCTGCCCCCACCCTG : 2185  
AOTVOKIR3DL4\*01 : ----- : -  
AOTVOKIR3DL4\*02 : ----- : -  
AOTVOKIR3DL4\*02v1 : ----- : -

```

AOTVOKIR3DL4*02v2 : ----- : -
AOTVOKIR3DL4*03   : ----- : -
AOTVOKIR3DS4*04   : ----- : -
AOTVOKIR3DS4*04v1 : ----- : -
AOTVOKIR3DS5*01   : ----- : -
AOTVOKIR2DS5*01v1 : ----- : -
AOTVOKIR2DS5*01v2 : ----- : -
AOTVOKIR3DS7*01   : ----- : -
AOTVOKIR3DS7*01v1 : ----- : -
AOTVOKIR3DL8*01   : ----- : -
AOTVOKIR3DL8*01v1 : ----- : -
AOTVOKIR3DS8*01v2 : ----- : -
AOTVOKIR3DL8*02   : ----- : -
AOTVOKIR4DL9*01   : ----- : -
AOTVOKIR4DS9*01v1 : ----- : -
AOTVOKIR3DL9*01v2 : ----- : -
AOTVOKIR4DL9*02   : ----- : -
AOTVOKIR4DL10*01  : ----- : -
AOTVOKIR3DL10*01v1 : ----- : -
AOTVOKIR4DS10*01v2 : ----- : -
AOTVOKIR3DS10*01v3 : ----- : -
AOTVOKIR3DS10*01v4 : ----- : -

```

```

          *      2200          *      2220          *      2240          *      2260          *      2280
BAC_clone_Om : TGTCTACCTCGTGTGTTGTTTTATGTAAGCAATTTTGCCGTATTAATCTAGTAAGAGTCCCTCATTTCAGCACTTACTAAAAGTTCTCAGCTGACA : 2280
AOTVOKIR3DL4*01 : ----- : -
AOTVOKIR3DL4*02 : ----- : -
AOTVOKIR3DL4*02v1 : ----- : -
AOTVOKIR3DL4*02v2 : ----- : -
AOTVOKIR3DL4*03 : ----- : -
AOTVOKIR3DS4*04 : ----- : -
AOTVOKIR3DS4*04v1 : ----- : -
AOTVOKIR3DS5*01 : ----- : -
AOTVOKIR2DS5*01v1 : ----- : -
AOTVOKIR2DS5*01v2 : ----- : -
AOTVOKIR3DS7*01 : ----- : -
AOTVOKIR3DS7*01v1 : ----- : -
AOTVOKIR3DL8*01 : ----- : -
AOTVOKIR3DL8*01v1 : ----- : -
AOTVOKIR3DS8*01v2 : ----- : -
AOTVOKIR3DL8*02 : ----- : -
AOTVOKIR4DL9*01 : ----- : -
AOTVOKIR4DS9*01v1 : ----- : -
AOTVOKIR3DL9*01v2 : ----- : -
AOTVOKIR4DL9*02 : ----- : -

```

```

AOTVOKIR4DL10*01 : ----- : -
AOTVOKIR3DL10*01v1 : ----- : -
AOTVOKIR4DS10*01v2 : ----- : -
AOTVOKIR3DS10*01v3 : ----- : -
AOTVOKIR3DS10*01v4 : ----- : -

```

```

                *      2300                *      2320                *      2340                *      2360                *
BAC_clone_Om    : CGTTTGTGTAGGGAGACGCCATGTCTATGCAGGATGGGACTTTCCTGTAGCTCTGGGCACCCAGGTGTGGTAGGAGCCTTAGAAACGTGGGAAA : 2375
AOTVOKIR3DL4*01 : ----- : -
AOTVOKIR3DL4*02 : ----- : -
AOTVOKIR3DL4*02v1 : ----- : -
AOTVOKIR3DL4*02v2 : ----- : -
AOTVOKIR3DL4*03 : ----- : -
AOTVOKIR3DS4*04 : ----- : -
AOTVOKIR3DS4*04v1 : ----- : -
AOTVOKIR3DS5*01 : ----- : -
AOTVOKIR2DS5*01v1 : ----- : -
AOTVOKIR2DS5*01v2 : ----- : -
AOTVOKIR3DS7*01 : ----- : -
AOTVOKIR3DS7*01v1 : ----- : -
AOTVOKIR3DL8*01 : ----- : -
AOTVOKIR3DL8*01v1 : ----- : -
AOTVOKIR3DS8*01v2 : ----- : -
AOTVOKIR3DL8*02 : ----- : -
AOTVOKIR4DL9*01 : ----- : -
AOTVOKIR4DS9*01v1 : ----- : -
AOTVOKIR3DL9*01v2 : ----- : -
AOTVOKIR4DL9*02 : ----- : -
AOTVOKIR4DL10*01 : ----- : -
AOTVOKIR3DL10*01v1 : ----- : -
AOTVOKIR4DS10*01v2 : ----- : -
AOTVOKIR3DS10*01v3 : ----- : -
AOTVOKIR3DS10*01v4 : ----- : -

```

```

                2380                *      2400                *      2420                *      2440                *      2460                *
BAC_clone_Om    : AGGGAGAATCTTCTGAGCACAGGGAGGGGCGGCTCCACATCTTCTCTCTAAGGCGACACCTCCTCCTCCCCAGGTGATCAGGACAAGCC : 2470
AOTVOKIR3DL4*01 : ----- : 83
AOTVOKIR3DL4*02 : ----- : 83
AOTVOKIR3DL4*02v1 : ----- : 47
AOTVOKIR3DL4*02v2 : ----- : 83
AOTVOKIR3DL4*03 : ----- : 83
AOTVOKIR3DS4*04 : ----- : 83
AOTVOKIR3DS4*04v1 : ----- : 83
AOTVOKIR3DS5*01 : ----- : 83

```

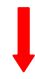



```

AOTVOKIR2DS5*01v1 : -----ATGGTCAGGAGCAGCC : 83
AOTVOKIR2DS5*01v2 : ----- : -
AOTVOKIR3DS7*01 : -----GTAGTCAGGACCAGCC : 83
AOTVOKIR3DS7*01v1 : -----GTAGTCAGGACCAGCC : 83
AOTVOKIR3DL8*01 : -----GTGGTCAGGACGAGCC : 83
AOTVOKIR3DL8*01v1 : -----GTGGTCAGGACGAGCC : 83
AOTVOKIR3DS8*01v2 : -----GTGGTCAGGACGAGCC : 83
AOTVOKIR3DL8*02 : -----GTGGTCAGGACGAGCC : 83
AOTVOKIR4DL9*01 : -----GTGGTGATGACCAGCC : 83
AOTVOKIR4DS9*01v1 : -----GTGGTGATGACCAGCC : 83
AOTVOKIR3DL9*01v2 : -----GTGGTGATGACCAGCC : 83
AOTVOKIR4DL9*02 : -----GTGGTGATGACCAGCC : 83
AOTVOKIR4DL10*01 : -----GTGGTCAGGACCAGCC : 83
AOTVOKIR3DL10*01v1 : -----GTGGTCAGGACCAGCC : 83
AOTVOKIR4DS10*01v2 : -----GTGGTCAGGACCAGCC : 83
AOTVOKIR3DS10*01v3 : -----GTGGTCAGGACCAGCC : 83
AOTVOKIR3DS10*01v4 : -----GTGGTCAGGACCAGCC : 83

```

**EXON 3a**

gtggtcaggac agcc

|  |      |   |      |   |      |   |      |   |      |  |
|--|------|---|------|---|------|---|------|---|------|--|
|  | 2480 | * | 2500 | * | 2520 | * | 2540 | * | 2560 |  |
|--|------|---|------|---|------|---|------|---|------|--|

```

BAC_clone_Om : CTTCCCTGTCTGCCTGGCCCAGCGCTGTGGTGTCTCTAGGAGGACATGTGACTCTTCGGTGTCACTATGGTGGTGGGTTTAACAACCTTCACCCTGT : 2565
AOTVOKIR3DL4*01 : CTTCCCTGTCTGCCTGGCCCAGCGCTGTGGTGTCTCCAGGAGGACACGTGACTCTTCGGTGTCACTATGGTGGTGGGTTTAACAACCTTCACCCTGT : 178
AOTVOKIR3DL4*02 : CTTCCCTGTCTGCCTGGCCCAGCGCTGTGGTGTCTCCAGGAGGACACGTGACTCTTCGGTGTCACTATGGTGGTGGGTTTAACAACCTTCACCCTGT : 178
AOTVOKIR3DL4*02v1 : CTTCCCTGTCTGCCTGGCCCAGCGCTGTGGTGTCTCCAGGAGGACACGTGACTCTTCGGTGTCACTATGGTGGTGGGTTTAACAACCTTCACCCTGT : 142
AOTVOKIR3DL4*02v2 : CTTCCCTGTCTGCCTGGCCCAGCGCTGTGGTGTCTCCAGGAGGACACGTGACTCTTCGGTGTCACTATGGTGGTGGGTTTAACAACCTTCACCCTGT : 178
AOTVOKIR3DL4*03 : CTTCCCTGTCTGCCTGGCCCAGCGCTGTGGTGTCTCCAGGAGGACACGTGACTCTTCGGTGTCACTATGGTGGTGGGTTTAACAACCTTCACCCTGT : 178
AOTVOKIR3DS4*04 : CTTCCCTGTCTGCCTGGCCCAGCGCTGTGGTGTCTCCAGGAGGACACGTGACTCTTCGGTGTCACTATGGTGGTGGGTTTAACAACCTTCACCCTGT : 178
AOTVOKIR3DS4*04v1 : CTTCCCTGTCTGCCTGGCCCAGCGCTGTGGTGTCTCCAGGAGGACACGTGACTCTTCGGTGTCACTATGGTGGTGGGTTTAACAACCTTCACCCTGT : 178
AOTVOKIR3DS5*01 : CTTCCCTGTCTGCCTGGCCCTAGCGCTGTGGTGACTCGAGGAGGACACGTGACTCTTCGGTGTCACTATGGTGGTGGGTTTAACAACCTTCACCCTGT : 178
AOTVOKIR2DS5*01v1 : CTTCCCTGTCTGCCTGGCCCTAGCGCTGTGGTGACTCGAGGAGGACACGTGACTCTTCGGTGTCACTATGGTGG----- : 154
AOTVOKIR2DS5*01v2 : ----- : -
AOTVOKIR3DS7*01 : CTTCCCTGTCTGCCTGGCCCAGCGCTGTGATGTCTCGAGGAGGAATGTAACTCTTCGGTGTGACTATGGTGGTGGGTTTAACAACCTTCACCCTGT : 178
AOTVOKIR3DS7*01v1 : CTTCCCTGTCTGCCTGGCCCAGCGCTGTGATGTCTCGAGGAGGAATGTAACTCTTCGGTGTGACTATGGTGGTGGGTTTAACAACCTTCACCCTGT : 178
AOTVOKIR3DL8*01 : CTTCCCTGTCTGCCTGGCCCAGCGCTGTGGTGTCTCGAGGAGGACATGTGACTCTTCGGTGTCACTATGATGGTGGGTTTAACAACCTTCACCCTGT : 178
AOTVOKIR3DL8*01v1 : CTTCCCTGTCTGCCTGGCCCAGCGCTGTGGTGTCTCGAGGAGGACATGTGACTCTTCGGTGTCACTATGATGGTGGGTTTAACAACCTTCACCCTGT : 178
AOTVOKIR3DS8*01v2 : CTTCCCTGTCTGCCTGGCCCAGCGCTGTGGTGTCTCGAGGAGGACATGTGACTCTTCGGTGTCACTATGATGGTGGGTTTAACAACCTTCACCCTGT : 178
AOTVOKIR3DL8*02 : CTTCCCTGTCTGCCTGGCCCAGCGCTGTGGTGTCTCGAGGAGGACATGTGACTCTTCGGTGTCACTATGATGGTGGGTTTAACAACCTTCACCCTGT : 178
AOTVOKIR4DL9*01 : CTTCCCTGTCTGCCTGGCCCAGCGCTGTGGTGTCTCAAGGAGGACATGTGACTCTTCGGTGTCACTATGGTGGTGGGTTTAACAACCTTCACCCTGT : 178
AOTVOKIR4DS9*01v1 : CTTCCCTGTCTGCCTGGCCCAGCGCTGTGGTGTCTCAAGGAGGACATGTGACTCTTCGGTGTCACTATGGTGGTGGGTTTAACAACCTTCACCCTGT : 178
AOTVOKIR3DL9*01v2 : CTTCCCTGTCTGCCTGGCCCAGCGCTGTGGTGTCTCAAGGAGGACATGTGACTCTTCGGTGTCACTATGGTG----- : 154
AOTVOKIR4DL9*02 : CTTCCCTGTCTGCCTGGCCCAGCGCTGTGGTGTCTCAAGGAGGACATGTGACTCTTCGGTGTCACTATGGTGGTGGGTTTAACAACCTTCACCCTGT : 178
AOTVOKIR4DL10*01 : CTTCCCTGTCTGCCTGGCCCAGCGCTGTGGTGTCTCGAGGAGGACACGTGACTCTTCGGTGTCACTATGGTGGTGGGTTTAACAACCTTCACCCTGT : 178
AOTVOKIR3DL10*01v1 : CTTCCCTGTCTGCCTGGCCCAGCGCTGTGGTGTCTCGAGGAGGACACGTGACTCTTCGGTGTCACTATG----- : 151
AOTVOKIR4DS10*01v2 : CTTCCCTGTCTGCCTGGCCCAGCGCTGTGGTGTCTCGAGGAGGACACGTGACTCTTCGGTGTCACTATGGTGGTGGGTTTAACAACCTTCACCCTGT : 178
AOTVOKIR3DS10*01v3 : CTTCCCTGTCTGCCTGGCCCAGCGCTGTGGTGTCTCGAGGAGGACACGTGACTCTTCGGTGTCACTATGGTGGTGGGTTTAACAACCTTCACCCTGT : 178
AOTVOKIR3DS10*01v4 : CTTCCCTGTCTGCCTGGCCCAGCGCTGTGGTGTCTCGAGGAGGACACGTGACTCTTCGGTGTCACTATGGTGGTGGGTTTAACAACCTTCACCCTGT : 178

```

cttctgtctgctggcccagcgctgtggtgtctc aggaggaca gtgactcttcggtgtcactatg tg tgggtttaacaacttcaccctgt

|                    | * | 2580                 | *         | 2600            | *             | 2620         | *           | 2640            | *            | 2660 |      |
|--------------------|---|----------------------|-----------|-----------------|---------------|--------------|-------------|-----------------|--------------|------|------|
| BAC_clone_Om       | : | ACAAAGAAGACAGATTCCAC | CGTTCCCAT | CCTCAATGGCATT   | TATATTCCAG    | GGAGAGCTTC   | GCATAGGCCCC | GTGACTGCAGCAG   | GACGCAGGGACC | :    | 2660 |
| AOTVOKIR3DL4*01    | : | ACAAAGAAGACAGATTCCAC | CGTTCCCAT | CCTCAACGGCGTT   | TATATTCCAG    | GGAGAGCTTCCT | CATGGGCC    | GTGACTGCAGCACAT | GCAGGGACC    | :    | 273  |
| AOTVOKIR3DL4*02    | : | ACAAAGAAGACAGATTCCAC | CGTTCCCAT | CCTCAACGGCGTT   | TATATTCCAG    | GGAGAGCTTCCT | CATGGGCC    | GTGACTGCAGCACAT | GCAGGGACC    | :    | 273  |
| AOTVOKIR3DL4*02v1  | : | ACAAAGAAGACAGATTCCAC | CGTTCCCAT | CCTCAACGGCGTT   | TATATTCCAG    | GGAGAGCTTCCT | CATGGGCC    | GTGACTGCAGCACAT | GCAGGGACC    | :    | 237  |
| AOTVOKIR3DL4*02v2  | : | ACAAAGAAGACAGATTCCAC | CGTTCCCAT | CCTCAACGGCGTT   | TATATTCCAG    | GGAGAGCTTCCT | CATGGGCC    | GTGACTGCAGCACAT | GCAGGGACC    | :    | 273  |
| AOTVOKIR3DL4*03    | : | ACAAAGAAGACAGATTCCAC | CGTTCCCAT | CCTCAACGGCGTT   | TATATTCCAG    | GGAGAGCTTCCT | CATGGGCC    | GTGACTGCAGCACAT | GCAGGGACC    | :    | 273  |
| AOTVOKIR3DS4*04    | : | ACAAAGAAGACAGATTCCAC | CGTTCCCAT | CCTCAACGGCGTT   | TATATTCCAG    | GGAGAGCTTCCT | CATGGGCC    | GTGACTGCAGCACAT | GCAGGGACC    | :    | 273  |
| AOTVOKIR3DS4*04v1  | : | ACAAAGAAGACAGATTCCAC | CGTTCCCAT | CCTCAACGGCGTT   | TATATTCCAG    | GGAGAGCTTCCT | CATGGGCC    | GTGACTGCAGCACAT | GCAGGGACC    | :    | 273  |
| AOTVOKIR3DS5*01    | : | ACAAAGAAGACAGATTCCAT | GTTCCCAT  | CCTGAACGGT      | GATATATTCCAG  | GGAGAGCTTCCT | CATGGGCC    | GTGACTGCAGCACAC | CAAGGGACC    | :    | 273  |
| AOTVOKIR2DS5*01v1  | : | -----                | -----     | -----           | -----         | -----        | -----       | -----           | -----        | :    | -    |
| AOTVOKIR2DS5*01v2  | : | -----                | -----     | -----           | -----         | -----        | -----       | -----           | -----        | :    | -    |
| AOTVOKIR3DS7*01    | : | ACAAAGAAGACAGATTCCAC | CGTTCCCAT | CCTCAACGGCGTT   | AATATTCCAT    | GAGAGCTTCCT  | CATGGGCC    | GTGACTGCAGCACAC | GCAGGGACC    | :    | 273  |
| AOTVOKIR3DS7*01v1  | : | ACAAAGAAGACAGATTCCAC | CGTTCCCAT | CCTCAACGGCGTT   | AATATTCCAT    | GAGAGCTTCCT  | CATGGGCC    | GTGACTGCAGCACAC | GCAGGGACC    | :    | 273  |
| AOTVOKIR3DL8*01    | : | ACAAAGAAGACAGATTCCAC | CGTACCCAT | CCTCAACGGCGTT   | TATATTCCAT    | GAGAGCTTCCT  | CATGGGCC    | GTGACTGCAGCACAC | GCAGGGACC    | :    | 273  |
| AOTVOKIR3DL8*01v1  | : | ACAAAGAAGACAGATTCCAC | CGTACCCAT | CCTCAACGGCGTT   | TATATTCCAT    | GAGAGCTTCCT  | CATGGGCC    | GTGACTGCAGCACAC | GCAGGGACC    | :    | 273  |
| AOTVOKIR3DS8*01v2  | : | ACAAAGAAGACAGATTCCAC | CGTACCCAT | CCTCAACGGCGTT   | TATATTCCAT    | GAGAGCTTCCT  | CATGGGCC    | GTGACTGCAGCACAC | GCAGGGACC    | :    | 273  |
| AOTVOKIR3DL8*02    | : | ACAAAGAAGACAGATTCCAC | CGTACCCAT | CCTCAACGGCGTT   | TATATTCCAT    | GAGAGCTTCCT  | CATGGGCC    | GTGACTGCAGCACAC | GCAGGGACC    | :    | 273  |
| AOTVOKIR4DL9*01    | : | ACAAAGAAGACAGATTCCAT | GTTCCCA   | AACCTCAACGGCGTT | TATATTCCAT    | GAGAGCTTCCT  | CATGGGCC    | GTGACTGCAGCACAC | GCAGGGACC    | :    | 273  |
| AOTVOKIR4DS9*01v1  | : | ACAAAGAAGACAGATTCCAT | GTTCCCA   | AACCTCAACGGCGTT | TATATTCCAT    | GAGAGCTTCCT  | CATGGGCC    | GTGACTGCAGCACAC | GCAGGGACC    | :    | 273  |
| AOTVOKIR3DL9*01v2  | : | -----                | -----     | -----           | -----         | -----        | -----       | -----           | -----        | :    | -    |
| AOTVOKIR4DL9*02    | : | ACAAAGAAGACAGATTCCAT | GTTCCCA   | AACCTCAACGGCGTT | TATATTCCAT    | GAGAGCTTCCT  | CATGGGCC    | GTGACTGCAGCACAC | GCAGGGACC    | :    | 273  |
| AOTVOKIR4DL10*01   | : | ACAAAGAAGACAGATTCCAC | CGTTCCCAT | CCTCAACGGT      | GTTTATATTCCAG | GGAGAGCTTCCT | CATGGGCC    | GTGACTGCAGCACAT | GCAGGGACC    | :    | 273  |
| AOTVOKIR3DL10*01v1 | : | -----                | -----     | -----           | -----         | -----        | -----       | -----           | -----        | :    | -    |
| AOTVOKIR4DS10*01v2 | : | ACAAAGAAGACAGATTCCAC | CGTTCCCAT | CCTCAACGGT      | GTTTATATTCCAG | GGAGAGCTTCCT | CATGGGCC    | GTGACTGCAGCACAT | GCAGGGACC    | :    | 273  |
| AOTVOKIR3DS10*01v3 | : | ACAAAGAAGACAGATTCCAC | CGTTCCCAT | CCTCAACGGT      | GTTTATATTCCAG | GGAGAGCTTCCT | CATGGGCC    | GTGACTGCAGCACAC | GCAGGGACC    | :    | 273  |
| AOTVOKIR3DS10*01v4 | : | ACAAAGAAGACAGATTCCAC | CGTTCCCAT | CCTCAACGGT      | GTTTATATTCCAG | GGAGAGCTTCCT | CATGGGCC    | GTGACTGCAGCACAC | GCAGGGACC    | :    | 273  |

acaaagaagacagattcca gt ccca cctcaacgg gt atattcca gagagcttcctcatggggcc gtgactgcagcaca gcagggacc

|                   | * | 2680            | *          | 2700       | *       | 2720     | *            | 2740        | *           |             |       |                |   |      |
|-------------------|---|-----------------|------------|------------|---------|----------|--------------|-------------|-------------|-------------|-------|----------------|---|------|
| BAC_clone_Om      | : | TACAGATGTCGGGGT | TTTCAG     | CCCGCACTCC | CACATTC | CAATGGAC | AGCTCC       | CAGCAACCCCT | GAAAGAT     | CATAGTTACAG | GT    | CAGAGGGCTCCTGT | : | 2755 |
| AOTVOKIR3DL4*01   | : | TACAGATGTCGGGGT | TTTCACCCGC | CACTCCC    | CACTGGG | CGGACGGC | ACAGCAACCCCT | AAAGAT      | CATAGTCACAG | -----       | ----- | -----          | : | 352  |
| AOTVOKIR3DL4*02   | : | TACAGATGTCGGGGT | TTTCACCCGC | CACTCCC    | CACTGGG | CGGACGGC | ACAGCAACCCCT | AAAGAT      | CATAGTCACAG | -----       | ----- | -----          | : | 352  |
| AOTVOKIR3DL4*02v1 | : | TACAGATGTCGGGGT | TTTCACCCGC | CACTCCC    | CACTGGG | CGGACGGC | ACAGCAACCCCT | AAAGAT      | CATAGTCACAG | -----       | ----- | -----          | : | 316  |
| AOTVOKIR3DL4*02v2 | : | TACAGATGTCGGGGT | TTTCACCCGC | CACTCCC    | CACTGGG | CGGACGGC | ACAGCAACCCCT | AAAGAT      | CATAGTCACAG | -----       | ----- | -----          | : | 352  |
| AOTVOKIR3DL4*03   | : | TACAGATGTCGGGGT | TTTCACCCGC | CACTCCC    | CACTGGG | CGGACGGC | ACAGCAACCCCT | AAAGAT      | CATAGTCACAG | -----       | ----- | -----          | : | 352  |
| AOTVOKIR3DS4*04   | : | TACAGATGTCGGGGT | TTTCACCCGC | CACTCCC    | CACTGGG | CGGACGGC | ACAGCAACCCCT | AAAGAT      | CATAGTCACAG | -----       | ----- | -----          | : | 352  |
| AOTVOKIR3DS4*04v1 | : | TACAGATGTCGGGGT | TTTCACCCGC | CACTCCC    | CACTGGG | CGGACGGC | ACAGCAACCCCT | AAAGAT      | CATAGTCACAG | -----       | ----- | -----          | : | 352  |
| AOTVOKIR3DS5*01   | : | TACAGATGTCGGGGT | TTTCACCCGC | CACTCCC    | CACTAGG | CGGACAGC | ACAGCAACCCCT | GAAAGAT     | CATAGTCACAG | -----       | ----- | -----          | : | 352  |
| AOTVOKIR2DS5*01v1 | : | -----           | -----      | -----      | -----   | -----    | -----        | -----       | -----       | -----       | ----- | -----          | : | -    |
| AOTVOKIR2DS5*01v2 | : | -----           | -----      | -----      | -----   | -----    | -----        | -----       | -----       | -----       | ----- | -----          | : | -    |
| AOTVOKIR3DS7*01   | : | TACAGATGTCGGGGT | TTTCACCCGC | CACTCCC    | CACTGGT | TGGACGGC | ACAGCAACCCCT | GAAAGAT     | CATAGTCACAG | -----       | ----- | -----          | : | 352  |
| AOTVOKIR3DS7*01v1 | : | TACAGATGTCGGGGT | TTTCACCCGC | CACTCCC    | CACTGGT | TGGACGGC | ACAGCAACCCCT | GAAAGAT     | CATAGTCACAG | -----       | ----- | -----          | : | 352  |
| AOTVOKIR3DL8*01   | : | TACAGATGTCGGGGT | TTTCACCCGC | CACTCCC    | CACTGGG | CGGACGGC | ACAGCAACCCCT | GAAAGAT     | CATAGTCACAG | -----       | ----- | -----          | : | 352  |

```

AOTVOKIR3DL8*01v1 : TACAGATGTCGGGGGTCTTCACCCGCACTCCCCACTGGGCGGACGGCACCCAGCAACCCCTGAAGATCATAGTCACAG----- : 352
AOTVOKIR3DS8*01v2 : TACAGATGTCGGGGGTCTTCACCCGCACTCCCCACTGGGCGGACGGCACCCAGCAACCCCTGAAGATCATAGTCACAG----- : 352
AOTVOKIR3DL8*02 : TACAGATGTCGGGGGTCTTCACCCGCACTCCCCACTGGGCGGACGGCACCCAGCAACCCCTGAAGATCATAGTCACAG----- : 352
AOTVOKIR4DL9*01 : TACAGATGTCGGGGGTCTTCACCCGCACTCCCTCCACTGGGTGGACAGCACCCAGCAACCCCTGAAGATCATAGTCACAG----- : 352
AOTVOKIR4DS9*01v1 : TACAGATGTCGGGGGTCTTCACCCGCACTCCCTCCACTGGGTGGACAGCACCCAGCAACCCCTGAAGATCATAGTCACAG----- : 352
AOTVOKIR3DL9*01v2 : ----- : -
AOTVOKIR4DL9*02 : TACAGATGTCGGGGGTCTTCACCCGCACTCCCTCCACTGGGTGGACAGCACCCAGCAACCCCTGAAGATCATAGTCACAG----- : 352
AOTVOKIR4DL10*01 : TACAGATGTCGGGGGTCTTCACCCGCACTCCCCACTGGGCGGACGGCACAAGCAAGCAACCCCTGAAGATCATAGTCACAG----- : 352
AOTVOKIR3DL10*01v1 : ----- : -
AOTVOKIR4DS10*01v2 : TACAGATGTCGGGGGTCTTCACCCGCACTCCCCACTGGGCGGACGGCACACAGCAACCCCTGAAGATCATAGTCACAG----- : 352
AOTVOKIR3DS10*01v3 : TACAGATGTCGGGGGTCTTCACCCGCACTCCCTCCACTGGGCGGACGGCACCCAGCAACCCCTGAAGATCATAGTCACAG----- : 352
AOTVOKIR3DS10*01v4 : TACAGATGTCGGGGGTCTTCACCCGCACTCCCTCCACTGGGCGGACGGCACCCAGCAACCCCTGAAGATCATAGTCACAG----- : 352
tacagatgtcgg gt ttcacccgcaactcc ccaact gg ggac gcac cagcaa ccct aagat atagtcacag

```

2760 \* 2780 \* 2800 \* 2820 \* 2840 \*

```

BAC_clone_Om : CTGGGCTTCTCACTGTCCTAACTCCTGAATCCCAGAGCTTCTGGTGGGTTGTCCATCAGGGTTTGATCACCCAGGCCCTGACTGTATTTGGGGTA : 2850
AOTVOKIR3DL4*01 : ----- : -
AOTVOKIR3DL4*02 : ----- : -
AOTVOKIR3DL4*02v1 : ----- : -
AOTVOKIR3DL4*02v2 : ----- : -
AOTVOKIR3DL4*03 : ----- : -
AOTVOKIR3DS4*04 : ----- : -
AOTVOKIR3DS4*04v1 : ----- : -
AOTVOKIR3DS5*01 : ----- : -
AOTVOKIR2DS5*01v1 : ----- : -
AOTVOKIR2DS5*01v2 : ----- : -
AOTVOKIR3DS7*01 : ----- : -
AOTVOKIR3DS7*01v1 : ----- : -
AOTVOKIR3DL8*01 : ----- : -
AOTVOKIR3DL8*01v1 : ----- : -
AOTVOKIR3DS8*01v2 : ----- : -
AOTVOKIR3DL8*02 : ----- : -
AOTVOKIR4DL9*01 : ----- : -
AOTVOKIR4DS9*01v1 : ----- : -
AOTVOKIR3DL9*01v2 : ----- : -
AOTVOKIR4DL9*02 : ----- : -
AOTVOKIR4DL10*01 : ----- : -
AOTVOKIR3DL10*01v1 : ----- : -
AOTVOKIR4DS10*01v2 : ----- : -
AOTVOKIR3DS10*01v3 : ----- : -
AOTVOKIR3DS10*01v4 : ----- : -

```

2860 \* 2880 \* 2900 \* 2920 \* 2940

```

BAC_clone_Om : AAGGGGATTGAATACAGGGAAGTGGGTGCCGTGGTGGGAAGAATAACTGTCCCCACTGATGGCCACATTCTCATCCCTGGAGCCTGTGACTATTT : 2945
AOTVOKIR3DL4*01 : ----- : -

```

```

AOTVOKIR3DL4*02      : ----- : -
AOTVOKIR3DL4*02v1    : ----- : -
AOTVOKIR3DL4*02v2    : ----- : -
AOTVOKIR3DL4*03      : ----- : -
AOTVOKIR3DS4*04      : ----- : -
AOTVOKIR3DS4*04v1    : ----- : -
AOTVOKIR3DS5*01      : ----- : -
AOTVOKIR2DS5*01v1    : ----- : -
AOTVOKIR2DS5*01v2    : ----- : -
AOTVOKIR3DS7*01      : ----- : -
AOTVOKIR3DS7*01v1    : ----- : -
AOTVOKIR3DL8*01      : ----- : -
AOTVOKIR3DL8*01v1    : ----- : -
AOTVOKIR3DS8*01v2    : ----- : -
AOTVOKIR3DL8*02      : ----- : -
AOTVOKIR4DL9*01      : ----- : -
AOTVOKIR4DS9*01v1    : ----- : -
AOTVOKIR3DL9*01v2    : ----- : -
AOTVOKIR4DL9*02      : ----- : -
AOTVOKIR4DL10*01     : ----- : -
AOTVOKIR3DL10*01v1   : ----- : -
AOTVOKIR4DS10*01v2   : ----- : -
AOTVOKIR3DS10*01v3   : ----- : -
AOTVOKIR3DS10*01v4   : ----- : -

```

```

          *      2960          *      2980          *      3000          *      3020          *      3040
BAC_clone_Om      : ATGTTACAGGGCAGGGGACTGAAGGGGGAAGATGGAGCTCAGGTTGTTGATGAGTTGACGTTGAGATGGGGAGGCTGCCTGGACTGTCCAGCTGT : 3040
AOTVOKIR3DL4*01   : ----- : -
AOTVOKIR3DL4*02   : ----- : -
AOTVOKIR3DL4*02v1 : ----- : -
AOTVOKIR3DL4*02v2 : ----- : -
AOTVOKIR3DL4*03   : ----- : -
AOTVOKIR3DS4*04   : ----- : -
AOTVOKIR3DS4*04v1 : ----- : -
AOTVOKIR3DS5*01   : ----- : -
AOTVOKIR2DS5*01v1 : ----- : -
AOTVOKIR2DS5*01v2 : ----- : -
AOTVOKIR3DS7*01   : ----- : -
AOTVOKIR3DS7*01v1 : ----- : -
AOTVOKIR3DL8*01   : ----- : -
AOTVOKIR3DL8*01v1 : ----- : -
AOTVOKIR3DS8*01v2 : ----- : -
AOTVOKIR3DL8*02   : ----- : -
AOTVOKIR4DL9*01   : ----- : -
AOTVOKIR4DS9*01v1 : ----- : -

```

```
AOTVOKIR3DL9*01v2 : ----- : -
AOTVOKIR4DL9*02   : ----- : -
AOTVOKIR4DL10*01  : ----- : -
AOTVOKIR3DL10*01v1 : ----- : -
AOTVOKIR4DS10*01v2 : ----- : -
AOTVOKIR3DS10*01v3 : ----- : -
AOTVOKIR3DS10*01v4 : ----- : -
```

```
           *         3060         *         3080         *         3100         *         3120         *
BAC_clone_Om    : GCTCAGTGTTCATCACAAAGTGGCCACATGAGAGGAGGAGAAAAGAGGGGAGTGCAGATTAGAGCAGCGTAGTGGGAGGGAGACTCCACCAGCCACTT : 3135
AOTVOKIR3DL4*01 : ----- : -
AOTVOKIR3DL4*02 : ----- : -
AOTVOKIR3DL4*02v1 : ----- : -
AOTVOKIR3DL4*02v2 : ----- : -
AOTVOKIR3DL4*03 : ----- : -
AOTVOKIR3DS4*04 : ----- : -
AOTVOKIR3DS4*04v1 : ----- : -
AOTVOKIR3DS5*01 : ----- : -
AOTVOKIR2DS5*01v1 : ----- : -
AOTVOKIR2DS5*01v2 : ----- : -
AOTVOKIR3DS7*01 : ----- : -
AOTVOKIR3DS7*01v1 : ----- : -
AOTVOKIR3DL8*01 : ----- : -
AOTVOKIR3DL8*01v1 : ----- : -
AOTVOKIR3DS8*01v2 : ----- : -
AOTVOKIR3DL8*02 : ----- : -
AOTVOKIR4DL9*01 : ----- : -
AOTVOKIR4DS9*01v1 : ----- : -
AOTVOKIR3DL9*01v2 : ----- : -
AOTVOKIR4DL9*02 : ----- : -
AOTVOKIR4DL10*01 : ----- : -
AOTVOKIR3DL10*01v1 : ----- : -
AOTVOKIR4DS10*01v2 : ----- : -
AOTVOKIR3DS10*01v3 : ----- : -
AOTVOKIR3DS10*01v4 : ----- : -
```

```
           3140         *         3160         *         3180         *         3200         *         3220         *
BAC_clone_Om    : CGGGCTCTGAATGTGGAGGAAGGCCAGGAGCCATGAATGCAGGTGGCCTCTAGGGGCTGGAGAAGTCAAGGGAAGTGAATTCTCCCAAGTGTCC : 3230
AOTVOKIR3DL4*01 : ----- : -
AOTVOKIR3DL4*02 : ----- : -
AOTVOKIR3DL4*02v1 : ----- : -
AOTVOKIR3DL4*02v2 : ----- : -
AOTVOKIR3DL4*03 : ----- : -
AOTVOKIR3DS4*04 : ----- : -
```

```

AOTVOKIR3DS4*04v1 : ----- : -
AOTVOKIR3DS5*01   : ----- : -
AOTVOKIR2DS5*01v1 : ----- : -
AOTVOKIR2DS5*01v2 : ----- : -
AOTVOKIR3DS7*01   : ----- : -
AOTVOKIR3DS7*01v1 : ----- : -
AOTVOKIR3DL8*01   : ----- : -
AOTVOKIR3DL8*01v1 : ----- : -
AOTVOKIR3DS8*01v2 : ----- : -
AOTVOKIR3DL8*02   : ----- : -
AOTVOKIR4DL9*01   : ----- : -
AOTVOKIR4DS9*01v1 : ----- : -
AOTVOKIR3DL9*01v2 : ----- : -
AOTVOKIR4DL9*02   : ----- : -
AOTVOKIR4DL10*01  : ----- : -
AOTVOKIR3DL10*01v1 : ----- : -
AOTVOKIR4DS10*01v2 : ----- : -
AOTVOKIR3DS10*01v3 : ----- : -
AOTVOKIR3DS10*01v4 : ----- : -

```

```

          3240      *      3260      *      3280      *      3300      *      3320
BAC_clone_Om   : AGAGGGGACGCAGCCCTGCATATGCCCTGATTTTAGCCCAGAGAGAACTGGGTCCGATTTCTGTCTCCAGAAGTGGGAAGGGCTCAGTGTGTTCTC : 3325
AOTVOKIR3DL4*01 : ----- : -
AOTVOKIR3DL4*02 : ----- : -
AOTVOKIR3DL4*02v1 : ----- : -
AOTVOKIR3DL4*02v2 : ----- : -
AOTVOKIR3DL4*03 : ----- : -
AOTVOKIR3DS4*04 : ----- : -
AOTVOKIR3DS4*04v1 : ----- : -
AOTVOKIR3DS5*01 : ----- : -
AOTVOKIR2DS5*01v1 : ----- : -
AOTVOKIR2DS5*01v2 : ----- : -
AOTVOKIR3DS7*01 : ----- : -
AOTVOKIR3DS7*01v1 : ----- : -
AOTVOKIR3DL8*01 : ----- : -
AOTVOKIR3DL8*01v1 : ----- : -
AOTVOKIR3DS8*01v2 : ----- : -
AOTVOKIR3DL8*02 : ----- : -
AOTVOKIR4DL9*01 : ----- : -
AOTVOKIR4DS9*01v1 : ----- : -
AOTVOKIR3DL9*01v2 : ----- : -
AOTVOKIR4DL9*02 : ----- : -
AOTVOKIR4DL10*01 : ----- : -
AOTVOKIR3DL10*01v1 : ----- : -
AOTVOKIR4DS10*01v2 : ----- : -

```

AOTVOKIR3DS10\*01v3 : ----- : -  
AOTVOKIR3DS10\*01v4 : ----- : -

\* 3340 \* 3360 \* 3380 \* 3400 \* 3420  
BAC\_clone\_Om : TCCTGCCACCATATTGTGATAATTTTCTACAGCAGCAACAGGAAACAATACAGGAACCCAGGGCAAGGACAAGTCAAGAAACCACACCAGGCTAA : 3420  
AOTVOKIR3DL4\*01 : ----- : -  
AOTVOKIR3DL4\*02 : ----- : -  
AOTVOKIR3DL4\*02v1 : ----- : -  
AOTVOKIR3DL4\*02v2 : ----- : -  
AOTVOKIR3DL4\*03 : ----- : -  
AOTVOKIR3DS4\*04 : ----- : -  
AOTVOKIR3DS4\*04v1 : ----- : -  
AOTVOKIR3DS5\*01 : ----- : -  
AOTVOKIR2DS5\*01v1 : ----- : -  
AOTVOKIR2DS5\*01v2 : ----- : -  
AOTVOKIR3DS7\*01 : ----- : -  
AOTVOKIR3DS7\*01v1 : ----- : -  
AOTVOKIR3DL8\*01 : ----- : -  
AOTVOKIR3DL8\*01v1 : ----- : -  
AOTVOKIR3DS8\*01v2 : ----- : -  
AOTVOKIR3DL8\*02 : ----- : -  
AOTVOKIR4DL9\*01 : ----- : -  
AOTVOKIR4DS9\*01v1 : ----- : -  
AOTVOKIR3DL9\*01v2 : ----- : -  
AOTVOKIR4DL9\*02 : ----- : -  
AOTVOKIR4DL10\*01 : ----- : -  
AOTVOKIR3DL10\*01v1 : ----- : -  
AOTVOKIR4DS10\*01v2 : ----- : -  
AOTVOKIR3DS10\*01v3 : ----- : -  
AOTVOKIR3DS10\*01v4 : ----- : -

\* 3440 \* 3460 \* 3480 \* 3500 \*  
BAC\_clone\_Om : GGGTGGCCCACTGACATCAGCAAGGGGGGGATGCTGAGGCCACCATCAGGCTCGATCCACAGAGGGAGGGGTTGATGCTCCTGGAACCAGCACC : 3515  
AOTVOKIR3DL4\*01 : ----- : -  
AOTVOKIR3DL4\*02 : ----- : -  
AOTVOKIR3DL4\*02v1 : ----- : -  
AOTVOKIR3DL4\*02v2 : ----- : -  
AOTVOKIR3DL4\*03 : ----- : -  
AOTVOKIR3DS4\*04 : ----- : -  
AOTVOKIR3DS4\*04v1 : ----- : -  
AOTVOKIR3DS5\*01 : ----- : -  
AOTVOKIR2DS5\*01v1 : ----- : -  
AOTVOKIR2DS5\*01v2 : ----- : -  
AOTVOKIR3DS7\*01 : ----- : -

```

AOTVOKIR3DS7*01v1 : ----- : -
AOTVOKIR3DL8*01   : ----- : -
AOTVOKIR3DL8*01v1 : ----- : -
AOTVOKIR3DS8*01v2 : ----- : -
AOTVOKIR3DL8*02   : ----- : -
AOTVOKIR4DL9*01   : ----- : -
AOTVOKIR4DS9*01v1 : ----- : -
AOTVOKIR3DL9*01v2 : ----- : -
AOTVOKIR4DL9*02   : ----- : -
AOTVOKIR4DL10*01  : ----- : -
AOTVOKIR3DL10*01v1 : ----- : -
AOTVOKIR4DS10*01v2 : ----- : -
AOTVOKIR3DS10*01v3 : ----- : -
AOTVOKIR3DS10*01v4 : ----- : -

```

```

          3520      *      3540      *      3560      *      3580      *      3600      *
BAC_clone_Om : AGGGGCTGCCCTATGGAAGCTGGGACCATGGAGAAGCACAGACATGGCAGGAGAGGCTCCCAGTCCCCACCAGGAACAGGGTGTGTGGACACTGC : 3610
AOTVOKIR3DL4*01 : ----- : -
AOTVOKIR3DL4*02 : ----- : -
AOTVOKIR3DL4*02v1 : ----- : -
AOTVOKIR3DL4*02v2 : ----- : -
AOTVOKIR3DL4*03 : ----- : -
AOTVOKIR3DS4*04 : ----- : -
AOTVOKIR3DS4*04v1 : ----- : -
AOTVOKIR3DS5*01 : ----- : -
AOTVOKIR2DS5*01v1 : ----- : -
AOTVOKIR2DS5*01v2 : ----- : -
AOTVOKIR3DS7*01 : ----- : -
AOTVOKIR3DS7*01v1 : ----- : -
AOTVOKIR3DL8*01 : ----- : -
AOTVOKIR3DL8*01v1 : ----- : -
AOTVOKIR3DS8*01v2 : ----- : -
AOTVOKIR3DL8*02 : ----- : -
AOTVOKIR4DL9*01 : ----- : -
AOTVOKIR4DS9*01v1 : ----- : -
AOTVOKIR3DL9*01v2 : ----- : -
AOTVOKIR4DL9*02 : ----- : -
AOTVOKIR4DL10*01 : ----- : -
AOTVOKIR3DL10*01v1 : ----- : -
AOTVOKIR4DS10*01v2 : ----- : -
AOTVOKIR3DS10*01v3 : ----- : -
AOTVOKIR3DS10*01v4 : ----- : -

```

```

          3620      *      3640      *      3660      *      3680      *      3700

```



```

BAC_clone_Om      : TGCCCGCCTTACTCATCAGTTCATACCTCCTGCCAGGGATTCCAATTTGTCCTAAACAGATTGAACCAGGCTGTTTCAGATCCTGGACGTGCAGCC : 3705
AOTVOKIR3DL4*01  : ----- : -
AOTVOKIR3DL4*02  : ----- : -
AOTVOKIR3DL4*02v1 : ----- : -
AOTVOKIR3DL4*02v2 : ----- : -
AOTVOKIR3DL4*03  : ----- : -
AOTVOKIR3DS4*04  : ----- : -
AOTVOKIR3DS4*04v1 : ----- : -
AOTVOKIR3DS5*01  : ----- : -
AOTVOKIR2DS5*01v1 : ----- : -
AOTVOKIR2DS5*01v2 : ----- : -
AOTVOKIR3DS7*01  : ----- : -
AOTVOKIR3DS7*01v1 : ----- : -
AOTVOKIR3DL8*01  : ----- : -
AOTVOKIR3DL8*01v1 : ----- : -
AOTVOKIR3DS8*01v2 : ----- : -
AOTVOKIR3DL8*02  : ----- : -
AOTVOKIR4DL9*01  : ----- : -
AOTVOKIR4DS9*01v1 : ----- : -
AOTVOKIR3DL9*01v2 : ----- : -
AOTVOKIR4DL9*02  : ----- : -
AOTVOKIR4DL10*01 : ----- : -
AOTVOKIR3DL10*01v1 : ----- : -
AOTVOKIR4DS10*01v2 : ----- : -
AOTVOKIR3DS10*01v3 : ----- : -
AOTVOKIR3DS10*01v4 : ----- : -

```

```

*           3720           *           3740           *           3760           *           3780           *           3800
BAC_clone_Om      : TGTCGTGGCTCCTCTTCCACCGTCCATGGACAGGAAGAAACAGATTAGTGGGAAACAGAAACAGCTCAAGGGATGAGGCTGAGCCCAGTGGGAA : 3800
AOTVOKIR3DL4*01  : ----- : -
AOTVOKIR3DL4*02  : ----- : -
AOTVOKIR3DL4*02v1 : ----- : -
AOTVOKIR3DL4*02v2 : ----- : -
AOTVOKIR3DL4*03  : ----- : -
AOTVOKIR3DS4*04  : ----- : -
AOTVOKIR3DS4*04v1 : ----- : -
AOTVOKIR3DS5*01  : ----- : -
AOTVOKIR2DS5*01v1 : ----- : -
AOTVOKIR2DS5*01v2 : ----- : -
AOTVOKIR3DS7*01  : ----- : -
AOTVOKIR3DS7*01v1 : ----- : -
AOTVOKIR3DL8*01  : ----- : -
AOTVOKIR3DL8*01v1 : ----- : -
AOTVOKIR3DS8*01v2 : ----- : -
AOTVOKIR3DL8*02  : ----- : -

```

AOTVOKIR4DL9\*01 : ----- : -  
AOTVOKIR4DS9\*01v1 : ----- : -  
AOTVOKIR3DL9\*01v2 : ----- : -  
AOTVOKIR4DL9\*02 : ----- : -  
AOTVOKIR4DL10\*01 : ----- : -  
AOTVOKIR3DL10\*01v1 : ----- : -  
AOTVOKIR4DS10\*01v2 : ----- : -  
AOTVOKIR3DS10\*01v3 : ----- : -  
AOTVOKIR3DS10\*01v4 : ----- : -

                  \*      3820          \*      3840          \*      3860          \*      3880          \*  
BAC\_clone\_Om      : GGGAGTCAGGGGCTGCTAGAGACAGAGACAGAGAAGAGGGGAGGGGGACAGAGGGGAGGGACCTGCACCAGGGGTGACGGGCACAGAAAGGAGCAGC : 3895  
AOTVOKIR3DL4\*01   : ----- : -  
AOTVOKIR3DL4\*02   : ----- : -  
AOTVOKIR3DL4\*02v1 : ----- : -  
AOTVOKIR3DL4\*02v2 : ----- : -  
AOTVOKIR3DL4\*03   : ----- : -  
AOTVOKIR3DS4\*04   : ----- : -  
AOTVOKIR3DS4\*04v1 : ----- : -  
AOTVOKIR3DS5\*01   : ----- : -  
AOTVOKIR2DS5\*01v1 : ----- : -  
AOTVOKIR2DS5\*01v2 : ----- : -  
AOTVOKIR3DS7\*01   : ----- : -  
AOTVOKIR3DS7\*01v1 : ----- : -  
AOTVOKIR3DL8\*01   : ----- : -  
AOTVOKIR3DL8\*01v1 : ----- : -  
AOTVOKIR3DS8\*01v2 : ----- : -  
AOTVOKIR3DL8\*02   : ----- : -  
AOTVOKIR4DL9\*01   : ----- : -  
AOTVOKIR4DS9\*01v1 : ----- : -  
AOTVOKIR3DL9\*01v2 : ----- : -  
AOTVOKIR4DL9\*02   : ----- : -  
AOTVOKIR4DL10\*01  : ----- : -  
AOTVOKIR3DL10\*01v1 : ----- : -  
AOTVOKIR4DS10\*01v2 : ----- : -  
AOTVOKIR3DS10\*01v3 : ----- : -  
AOTVOKIR3DS10\*01v4 : ----- : -

                  3900          \*      3920          \*      3940          \*      3960          \*      3980          \*  
BAC\_clone\_Om      : GAGACACAGAGAGGGAGGAGAGAGTCCAGACACCGGGGAGGGGAATCCTCACTCATTCCAGGTCCCATGGATGGGATGAGAAAGGGAGATGCCTTC : 3990  
AOTVOKIR3DL4\*01   : ----- : -  
AOTVOKIR3DL4\*02   : ----- : -  
AOTVOKIR3DL4\*02v1 : ----- : -  
AOTVOKIR3DL4\*02v2 : ----- : -

```

AOTVOKIR3DL4*03 : ----- : -
AOTVOKIR3DS4*04 : ----- : -
AOTVOKIR3DS4*04v1 : ----- : -
AOTVOKIR3DS5*01 : ----- : -
AOTVOKIR2DS5*01v1 : ----- : -
AOTVOKIR2DS5*01v2 : ----- : -
AOTVOKIR3DS7*01 : ----- : -
AOTVOKIR3DS7*01v1 : ----- : -
AOTVOKIR3DL8*01 : ----- : -
AOTVOKIR3DL8*01v1 : ----- : -
AOTVOKIR3DS8*01v2 : ----- : -
AOTVOKIR3DL8*02 : ----- : -
AOTVOKIR4DL9*01 : ----- : -
AOTVOKIR4DS9*01v1 : ----- : -
AOTVOKIR3DL9*01v2 : ----- : -
AOTVOKIR4DL9*02 : ----- : -
AOTVOKIR4DL10*01 : ----- : -
AOTVOKIR3DL10*01v1 : ----- : -
AOTVOKIR4DS10*01v2 : ----- : -
AOTVOKIR3DS10*01v3 : ----- : -
AOTVOKIR3DS10*01v4 : ----- : -

```

```

                4000          *          4020          *          4040          *          4060          *          4080
BAC_clone_Om : TAAACTCACAATCTCGTTTCTTAGGATTCCACAGAAAACCTTCCCTCCTGGCCCTCCCAGCTCCCTTGGTGAGATCAGGAGAGACGGTCATCCTG : 4085
AOTVOKIR3DL4*01 : ----- : -
AOTVOKIR3DL4*02 : ----- : -
AOTVOKIR3DL4*02v1 : ----- : -
AOTVOKIR3DL4*02v2 : ----- : -
AOTVOKIR3DL4*03 : ----- : -
AOTVOKIR3DS4*04 : ----- : -
AOTVOKIR3DS4*04v1 : ----- : -
AOTVOKIR3DS5*01 : ----- : -
AOTVOKIR2DS5*01v1 : ----- : -
AOTVOKIR2DS5*01v2 : ----- : -
AOTVOKIR3DS7*01 : ----- : -
AOTVOKIR3DS7*01v1 : ----- : -
AOTVOKIR3DL8*01 : ----- : -
AOTVOKIR3DL8*01v1 : ----- : -
AOTVOKIR3DS8*01v2 : ----- : -
AOTVOKIR3DL8*02 : ----- : -
AOTVOKIR4DL9*01 : ----- : -
AOTVOKIR4DS9*01v1 : ----- : -
AOTVOKIR3DL9*01v2 : ----- : -
AOTVOKIR4DL9*02 : ----- : -
AOTVOKIR4DL10*01 : ----- : -

```

AOTVOKIR3DL10\*01v1 : ----- : -  
AOTVOKIR4DS10\*01v2 : ----- : -  
AOTVOKIR3DS10\*01v3 : ----- : -  
AOTVOKIR3DS10\*01v4 : ----- : -

\* 4100 \* 4120 \* 4140 \* 4160 \* 4180  
BAC\_clone\_Om : CAGTGTTGGTTCAGATATCATGTCTGAGCACTTCCTTCTGCACAGAAAGGAGCTCACAAGGACATGCCCCACCCCGTGTCTACCTTGTGTGTTTT : 4180  
AOTVOKIR3DL4\*01 : ----- : -  
AOTVOKIR3DL4\*02 : ----- : -  
AOTVOKIR3DL4\*02v1 : ----- : -  
AOTVOKIR3DL4\*02v2 : ----- : -  
AOTVOKIR3DL4\*03 : ----- : -  
AOTVOKIR3DS4\*04 : ----- : -  
AOTVOKIR3DS4\*04v1 : ----- : -  
AOTVOKIR3DS5\*01 : ----- : -  
AOTVOKIR2DS5\*01v1 : ----- : -  
AOTVOKIR2DS5\*01v2 : ----- : -  
AOTVOKIR3DS7\*01 : ----- : -  
AOTVOKIR3DS7\*01v1 : ----- : -  
AOTVOKIR3DL8\*01 : ----- : -  
AOTVOKIR3DL8\*01v1 : ----- : -  
AOTVOKIR3DS8\*01v2 : ----- : -  
AOTVOKIR3DL8\*02 : ----- : -  
AOTVOKIR4DL9\*01 : ----- : -  
AOTVOKIR4DS9\*01v1 : ----- : -  
AOTVOKIR3DL9\*01v2 : ----- : -  
AOTVOKIR4DL9\*02 : ----- : -  
AOTVOKIR4DL10\*01 : ----- : -  
AOTVOKIR3DL10\*01v1 : ----- : -  
AOTVOKIR4DS10\*01v2 : ----- : -  
AOTVOKIR3DS10\*01v3 : ----- : -  
AOTVOKIR3DS10\*01v4 : ----- : -

\* 4200 \* 4220 \* 4240 \* 4260 \*  
BAC\_clone\_Om : TATGAAAGCAATTTTACCGTATTAAAATCTAGTAGGAGTCGCTCATTGAGCACTTACTCAAAGTTCTCAGCTGGCACGTTTGTGTAGGGAGATG : 4275  
AOTVOKIR3DL4\*01 : ----- : -  
AOTVOKIR3DL4\*02 : ----- : -  
AOTVOKIR3DL4\*02v1 : ----- : -  
AOTVOKIR3DL4\*02v2 : ----- : -  
AOTVOKIR3DL4\*03 : ----- : -  
AOTVOKIR3DS4\*04 : ----- : -  
AOTVOKIR3DS4\*04v1 : ----- : -  
AOTVOKIR3DS5\*01 : ----- : -  
AOTVOKIR2DS5\*01v1 : ----- : -

```

AOTVOKIR2DS5*01v2 : ----- : -
AOTVOKIR3DS7*01   : ----- : -
AOTVOKIR3DS7*01v1 : ----- : -
AOTVOKIR3DL8*01   : ----- : -
AOTVOKIR3DL8*01v1 : ----- : -
AOTVOKIR3DS8*01v2 : ----- : -
AOTVOKIR3DL8*02   : ----- : -
AOTVOKIR4DL9*01   : ----- : -
AOTVOKIR4DS9*01v1 : ----- : -
AOTVOKIR3DL9*01v2 : ----- : -
AOTVOKIR4DL9*02   : ----- : -
AOTVOKIR4DL10*01  : ----- : -
AOTVOKIR3DL10*01v1 : ----- : -
AOTVOKIR4DS10*01v2 : ----- : -
AOTVOKIR3DS10*01v3 : ----- : -
AOTVOKIR3DS10*01v4 : ----- : -

```

```

          4280      *      4300      *      4320      *      4340      *      4360      *
BAC_clone_Om : CCATGTCTGTGCAGGATGGGTCCTTCCTGTAGCTCTGGGCACCCAGGTGTGGTAGGAGCCTTAGAAACATGGAAAAAGGGAGAATCTTCTGAGCA : 4370
AOTVOKIR3DL4*01 : ----- : -
AOTVOKIR3DL4*02 : ----- : -
AOTVOKIR3DL4*02v1 : ----- : -
AOTVOKIR3DL4*02v2 : ----- : -
AOTVOKIR3DL4*03 : ----- : -
AOTVOKIR3DS4*04 : ----- : -
AOTVOKIR3DS4*04v1 : ----- : -
AOTVOKIR3DS5*01 : ----- : -
AOTVOKIR2DS5*01v1 : ----- : -
AOTVOKIR2DS5*01v2 : ----- : -
AOTVOKIR3DS7*01 : ----- : -
AOTVOKIR3DS7*01v1 : ----- : -
AOTVOKIR3DL8*01 : ----- : -
AOTVOKIR3DL8*01v1 : ----- : -
AOTVOKIR3DS8*01v2 : ----- : -
AOTVOKIR3DL8*02 : ----- : -
AOTVOKIR4DL9*01 : ----- : -
AOTVOKIR4DS9*01v1 : ----- : -
AOTVOKIR3DL9*01v2 : ----- : -
AOTVOKIR4DL9*02 : ----- : -
AOTVOKIR4DL10*01 : ----- : -
AOTVOKIR3DL10*01v1 : ----- : -
AOTVOKIR4DS10*01v2 : ----- : -
AOTVOKIR3DS10*01v3 : ----- : -
AOTVOKIR3DS10*01v4 : ----- : -

```

EXON 3b

4380            \*            4400            \*            4420            \*            4440            \*            4460

BAC\_clone\_Om : CAGGGAGGGAGGGGCGGCTCCACATCTTCCTCTCTAAGGCAACGCCTCCTCCTCCCCCAGGTGCTCAGGACCAGCCCTTCCTGTCTGCCTGGCCC : 4465

AOTVOKIR3DL4\*01 : ----- : -

AOTVOKIR3DL4\*02 : ----- : -

AOTVOKIR3DL4\*02v1 : ----- : -

AOTVOKIR3DL4\*02v2 : ----- : -

AOTVOKIR3DL4\*03 : ----- : -

AOTVOKIR3DS4\*04 : ----- : -

AOTVOKIR3DS4\*04v1 : ----- : -

AOTVOKIR3DS5\*01 : ----- : -

AOTVOKIR2DS5\*01v1 : ----- : -

AOTVOKIR2DS5\*01v2 : ----- : -

AOTVOKIR3DS7\*01 : ----- : -

AOTVOKIR3DS7\*01v1 : ----- : -

AOTVOKIR3DL8\*01 : ----- : -

AOTVOKIR3DL8\*01v1 : ----- : -

AOTVOKIR3DS8\*01v2 : ----- : -

AOTVOKIR3DL8\*02 : ----- : -

AOTVOKIR4DL9\*01 : ----- GTGGTCAGGACAAGCCCTTCCTGTCTGCCTGGCCC : 387

AOTVOKIR4DS9\*01v1 : ----- GTGGTCAGGACAAGCCCTTCCTGTCTGCCTGGCCC : 387

AOTVOKIR3DL9\*01v2 : ----- GTGGTCAGGACAAGCCCTTCCTGTCTGCCTGGCCC : 189

AOTVOKIR4DL9\*02 : ----- GTGGTCAGGACAAGCCCTTCCTGTCTGCCTGGCCC : 387

AOTVOKIR4DL10\*01 : ----- GTGGTCAGGACAAGCCCTTCCTGTCTGCCTGGCCC : 387

AOTVOKIR3DL10\*01v1 : ----- GTGGTCAGGACAAGCCCTTCCTGTCTGCCTGGCCC : 186

AOTVOKIR4DS10\*01v2 : ----- GTGGTCAGGACAAGCCCTTCCTGTCTGCCTGGCCC : 387

AOTVOKIR3DS10\*01v3 : ----- : -

AOTVOKIR3DS10\*01v4 : ----- : -

\*            4480            \*            4500            \*            4520            \*            4540            \*            4560

BAC\_clone\_Om : AGCGCTGTGGTGTCTCCAGGAGGACACGTGACTCTTCGGTGTCACTATGGTCGTGGGTTTAACAACCTCACCCCTGTACAAAGAAGACAGATTCCA : 4560

AOTVOKIR3DL4\*01 : ----- : -

AOTVOKIR3DL4\*02 : ----- : -

AOTVOKIR3DL4\*02v1 : ----- : -

AOTVOKIR3DL4\*02v2 : ----- : -

AOTVOKIR3DL4\*03 : ----- : -

AOTVOKIR3DS4\*04 : ----- : -

AOTVOKIR3DS4\*04v1 : ----- : -

AOTVOKIR3DS5\*01 : ----- : -

AOTVOKIR2DS5\*01v1 : ----- : -

AOTVOKIR2DS5\*01v2 : ----- : -

AOTVOKIR3DS7\*01 : ----- : -

AOTVOKIR3DS7\*01v1 : ----- : -

AOTVOKIR3DL8\*01 : ----- : -

AOTVOKIR3DL8\*01v1 : ----- : -

```

AOTVOKIR3DS8*01v2 : ----- : -
AOTVOKIR3DL8*02 : ----- : -
AOTVOKIR4DL9*01 : AGCGCTGTGGTGCCTCGAGGTGGAACGTGACTCTTCGGTGTGACTATGGTGGTGGGTTTAAACAACCTTCACCCTGTACAAAGAAGACAGATTCGA : 482
AOTVOKIR4DS9*01v1 : AGCGCTGTGGTGCCTCGAGGTGGAACGTGACTCTTCGGTGTGACTATGGTGGTGGGTTTAAACAACCTTCACCCTGTACAAAGAAGACAGATTCGA : 482
AOTVOKIR3DL9*01v2 : AGCGCTGTGGTGCCTCGAGGTGGAACGTGACTCTTCGGTGTGACTATGGTGGTGGGTTTAAACAACCTTCACCCTGTACAAAGAAGACAGATTCGA : 284
AOTVOKIR4DL9*02 : AGCGCTGTGGTGCCTCGAGGTGGAACGTGACTCTTCGGTGTGACTATGGTGGTGGGTTTAAACAACCTTCACCCTGTACAAAGAAGACAGATTCGA : 482
AOTVOKIR4DL10*01 : AGCGCTGTGGTGCCTCGAGGTGGAATGTGACTCTTCGGTGTGACTATGGTGGTGGGTTTAAACAACCTTCACCCTGTATAAAGAAGACAGATTCGA : 482
AOTVOKIR3DL10*01v1 : AGCGCTGTGGTGCCTCGAGGTGGAATGTGACTCTTCGGTGTGACTATGGTGGTGGGTTTAAACAACCTTCACCCTGTATAAAGAAGACAGATTCGA : 281
AOTVOKIR4DS10*01v2 : AGCGCTGTGGTGCCTCGAGGTGGAATGTGACTCTTCGGTGTGACTATGGTGGTGGGTTTAAACAACCTTCACCCTGTATAAAGAAGACAGATTCGA : 482
AOTVOKIR3DS10*01v3 : ----- : -
AOTVOKIR3DS10*01v4 : ----- : -

```

```

                *      4580                *      4600                *      4620                *      4640                *
BAC_clone_Om    : CGTTCCTATCCTCAACGGCGACATATTCCAGGAGAGCTTCCTCATGGGCCCGTGACTGCAGAACACGCAGGGACCTACAGATGTCGGGGTTTTTC : 4655
AOTVOKIR3DL4*01 : ----- : -
AOTVOKIR3DL4*02 : ----- : -
AOTVOKIR3DL4*02v1 : ----- : -
AOTVOKIR3DL4*02v2 : ----- : -
AOTVOKIR3DL4*03 : ----- : -
AOTVOKIR3DS4*04 : ----- : -
AOTVOKIR3DS4*04v1 : ----- : -
AOTVOKIR3DS5*01 : ----- : -
AOTVOKIR2DS5*01v1 : ----- : -
AOTVOKIR2DS5*01v2 : ----- : -
AOTVOKIR3DS7*01 : ----- : -
AOTVOKIR3DS7*01v1 : ----- : -
AOTVOKIR3DL8*01 : ----- : -
AOTVOKIR3DL8*01v1 : ----- : -
AOTVOKIR3DS8*01v2 : ----- : -
AOTVOKIR3DL8*02 : ----- : -
AOTVOKIR4DL9*01 : CGTACCCATCCTCAATGGCGTTATATTCCAGGAGAGCTTCTTGATGGGCCCGTGACTGCAGCACACGCAGGGACCTACAGATGTCGGCGTTTTTC : 577
AOTVOKIR4DS9*01v1 : CGTACCCATCCTCAATGGCGTTATATTCCAGGAGAGCTTCTTGATGGGCCCGTGACTGCAGCACACGCAGGGACCTACAGATGTCGGCGTTTTTC : 577
AOTVOKIR3DL9*01v2 : CGTACCCATCCTCAATGGCGTTATATTCCAGGAGAGCTTCTTGATGGGCCCGTGACTGCAGCACACGCAGGGACCTACAGATGTCGGCGTTTTTC : 379
AOTVOKIR4DL9*02 : CGTACCCATCCTCAATGGCGTTATATTCCAGGAGAGCTTCTTGATGGGCCCGTGACTGCAGCACACGCAGGGACCTACAGATGTCGGCGTTTTTC : 577
AOTVOKIR4DL10*01 : CGTACCCATCCTCAATGGCGTTATATTCCAGGAGAGCTTCTTGATGGGCCCGTGACTGCAGCACACGCAGGGACCTACAGATGTCGGCGTTTTTC : 577
AOTVOKIR3DL10*01v1 : CGTACCCATCCTCAATGGCGTTATATTCCAGGAGAGCTTCTTGATGGGCCCGTGACTGCAGCACACGCAGGGACCTACAGATGTCGGCGTTTTTC : 376
AOTVOKIR4DS10*01v2 : CGTACCCATCCTCAATGGCGTTATATTCCAGGAGAGCTTCTTGATGGGCCCGTGACTGCAGCACACGCAGGGACCTACAGATGTCGGCGTTTTTC : 577
AOTVOKIR3DS10*01v3 : ----- : -
AOTVOKIR3DS10*01v4 : ----- : -

```

```

                4660                *      4680                *      4700                *      4720                *      4740                *
BAC_clone_Om    : ACCCGCACTACCCCACTGGGTGGACGGCACACAGCAACCCCTGAAGATCATAGTCACAGGTGAGAGGGCTCCTGCCTGGGCTTCTCACTGTCCC : 4750
AOTVOKIR3DL4*01 : ----- : -
AOTVOKIR3DL4*02 : ----- : -

```

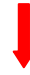

|                    |   |                                                              |   |     |
|--------------------|---|--------------------------------------------------------------|---|-----|
| AOTVOKIR3DL4*02v1  | : | -----                                                        | : | -   |
| AOTVOKIR3DL4*02v2  | : | -----                                                        | : | -   |
| AOTVOKIR3DL4*03    | : | -----                                                        | : | -   |
| AOTVOKIR3DS4*04    | : | -----                                                        | : | -   |
| AOTVOKIR3DS4*04v1  | : | -----                                                        | : | -   |
| AOTVOKIR3DS5*01    | : | -----                                                        | : | -   |
| AOTVOKIR2DS5*01v1  | : | -----                                                        | : | -   |
| AOTVOKIR2DS5*01v2  | : | -----                                                        | : | -   |
| AOTVOKIR3DS7*01    | : | -----                                                        | : | -   |
| AOTVOKIR3DS7*01v1  | : | -----                                                        | : | -   |
| AOTVOKIR3DL8*01    | : | -----                                                        | : | -   |
| AOTVOKIR3DL8*01v1  | : | -----                                                        | : | -   |
| AOTVOKIR3DS8*01v2  | : | -----                                                        | : | -   |
| AOTVOKIR3DL8*02    | : | -----                                                        | : | -   |
| AOTVOKIR4DL9*01    | : | ACCCGCACTCCTCCACTGGGCGGACGGCACCCAGCAACCCCCTGGAGATCATAGTCACAG | : | 637 |
| AOTVOKIR4DS9*01v1  | : | ACCCGCACTCCTCCACTGGGCGGACGGCACCCAGCAACCCCCTGGAGATCATAGTCACAG | : | 637 |
| AOTVOKIR3DL9*01v2  | : | ACCCGCACTCCTCCACTGGGCGGACGGCACCCAGCAACCCCCTGGAGATCATAGTCACAG | : | 439 |
| AOTVOKIR4DL9*02    | : | ACCCGCACTCCTCCACTGGGCGGACGGCACCCAGCAACCCCCTGGAGATCATAGTCACAG | : | 637 |
| AOTVOKIR4DL10*01   | : | ACCCGCACTCCTCCACTGGGCGGACGGCACCCAGCAACGCCCTGAAGATCATAGTCACAG | : | 637 |
| AOTVOKIR3DL10*01v1 | : | ACCCGCACTCCTCCACTGGGCGGACGGCACCCAGCAACGCCCTGAAGATCATAGTCACAG | : | 436 |
| AOTVOKIR4DS10*01v2 | : | ACCCGCACTCCTCCACTGGGCGGACGGCACCCAGCAACGCCCTGAAGATCATAGTCACAG | : | 637 |
| AOTVOKIR3DS10*01v3 | : | -----                                                        | : | -   |
| AOTVOKIR3DS10*01v4 | : | -----                                                        | : | -   |

|                   |   |                                                                                                 |   |      |   |      |   |      |   |      |  |
|-------------------|---|-------------------------------------------------------------------------------------------------|---|------|---|------|---|------|---|------|--|
|                   |   | 4760                                                                                            | * | 4780 | * | 4800 | * | 4820 | * | 4840 |  |
| BAC_clone_Om      | : | ACTTCCTGAATCCCAGAGCTTTTGGTGGGGTGCCCATCAGGGTCCAATCACCGAGGCCCTGACTGTATTTGGGGTAAAGGGGATTGAATACAGGG | : | 4845 |   |      |   |      |   |      |  |
| AOTVOKIR3DL4*01   | : | -----                                                                                           | : | -    |   |      |   |      |   |      |  |
| AOTVOKIR3DL4*02   | : | -----                                                                                           | : | -    |   |      |   |      |   |      |  |
| AOTVOKIR3DL4*02v1 | : | -----                                                                                           | : | -    |   |      |   |      |   |      |  |
| AOTVOKIR3DL4*02v2 | : | -----                                                                                           | : | -    |   |      |   |      |   |      |  |
| AOTVOKIR3DL4*03   | : | -----                                                                                           | : | -    |   |      |   |      |   |      |  |
| AOTVOKIR3DS4*04   | : | -----                                                                                           | : | -    |   |      |   |      |   |      |  |
| AOTVOKIR3DS4*04v1 | : | -----                                                                                           | : | -    |   |      |   |      |   |      |  |
| AOTVOKIR3DS5*01   | : | -----                                                                                           | : | -    |   |      |   |      |   |      |  |
| AOTVOKIR2DS5*01v1 | : | -----                                                                                           | : | -    |   |      |   |      |   |      |  |
| AOTVOKIR2DS5*01v2 | : | -----                                                                                           | : | -    |   |      |   |      |   |      |  |
| AOTVOKIR3DS7*01   | : | -----                                                                                           | : | -    |   |      |   |      |   |      |  |
| AOTVOKIR3DS7*01v1 | : | -----                                                                                           | : | -    |   |      |   |      |   |      |  |
| AOTVOKIR3DL8*01   | : | -----                                                                                           | : | -    |   |      |   |      |   |      |  |
| AOTVOKIR3DL8*01v1 | : | -----                                                                                           | : | -    |   |      |   |      |   |      |  |
| AOTVOKIR3DS8*01v2 | : | -----                                                                                           | : | -    |   |      |   |      |   |      |  |
| AOTVOKIR3DL8*02   | : | -----                                                                                           | : | -    |   |      |   |      |   |      |  |
| AOTVOKIR4DL9*01   | : | -----                                                                                           | : | -    |   |      |   |      |   |      |  |
| AOTVOKIR4DS9*01v1 | : | -----                                                                                           | : | -    |   |      |   |      |   |      |  |
| AOTVOKIR3DL9*01v2 | : | -----                                                                                           | : | -    |   |      |   |      |   |      |  |



AOTVOKIR4DL9\*02 : ----- : -  
 AOTVOKIR4DL10\*01 : ----- : -  
 AOTVOKIR3DL10\*01v1 : ----- : -  
 AOTVOKIR4DS10\*01v2 : ----- : -  
 AOTVOKIR3DS10\*01v3 : ----- : -  
 AOTVOKIR3DS10\*01v4 : ----- : -

\* 4860 \* 4880 \* 4900 \* 4920 \* 4940  
 BAC\_clone\_Om : AAGTGGGTGCCATGGTGGGAAGAATAACTGTCCCCACTGATGGCCACATTCTCATCCCTGGAACCTGTGACTATTTATGTTACAGGGCAGGGGAC : 4940  
 AOTVOKIR3DL4\*01 : ----- : -  
 AOTVOKIR3DL4\*02 : ----- : -  
 AOTVOKIR3DL4\*02v1 : ----- : -  
 AOTVOKIR3DL4\*02v2 : ----- : -  
 AOTVOKIR3DL4\*03 : ----- : -  
 AOTVOKIR3DS4\*04 : ----- : -  
 AOTVOKIR3DS4\*04v1 : ----- : -  
 AOTVOKIR3DS5\*01 : ----- : -  
 AOTVOKIR2DS5\*01v1 : ----- : -  
 AOTVOKIR2DS5\*01v2 : ----- : -  
 AOTVOKIR3DS7\*01 : ----- : -  
 AOTVOKIR3DS7\*01v1 : ----- : -  
 AOTVOKIR3DL8\*01 : ----- : -  
 AOTVOKIR3DL8\*01v1 : ----- : -  
 AOTVOKIR3DS8\*01v2 : ----- : -  
 AOTVOKIR3DL8\*02 : ----- : -  
 AOTVOKIR4DL9\*01 : ----- : -  
 AOTVOKIR4DS9\*01v1 : ----- : -  
 AOTVOKIR3DL9\*01v2 : ----- : -  
 AOTVOKIR4DL9\*02 : ----- : -  
 AOTVOKIR4DL10\*01 : ----- : -  
 AOTVOKIR3DL10\*01v1 : ----- : -  
 AOTVOKIR4DS10\*01v2 : ----- : -  
 AOTVOKIR3DS10\*01v3 : ----- : -  
 AOTVOKIR3DS10\*01v4 : ----- : -

\* 4960 \* 4980 \* 5000 \* 5020 \*  
 BAC\_clone\_Om : TGAAGGGGGAAGATGGAGCTCAGGTTGTTGATGAGTTGACCTTGAGATGGGGAGGCCGCCTGGACTGTCCAGCTGGGCTCAGTGTCATCACAAGT : 5035  
 AOTVOKIR3DL4\*01 : ----- : -  
 AOTVOKIR3DL4\*02 : ----- : -  
 AOTVOKIR3DL4\*02v1 : ----- : -  
 AOTVOKIR3DL4\*02v2 : ----- : -  
 AOTVOKIR3DL4\*03 : ----- : -  
 AOTVOKIR3DS4\*04 : ----- : -  
 AOTVOKIR3DS4\*04v1 : ----- : -

```

AOTVOKIR3DS5*01      : ----- : -
AOTVOKIR2DS5*01v1   : ----- : -
AOTVOKIR2DS5*01v2   : ----- : -
AOTVOKIR3DS7*01     : ----- : -
AOTVOKIR3DS7*01v1   : ----- : -
AOTVOKIR3DL8*01     : ----- : -
AOTVOKIR3DL8*01v1   : ----- : -
AOTVOKIR3DS8*01v2   : ----- : -
AOTVOKIR3DL8*02     : ----- : -
AOTVOKIR4DL9*01     : ----- : -
AOTVOKIR4DS9*01v1   : ----- : -
AOTVOKIR3DL9*01v2   : ----- : -
AOTVOKIR4DL9*02     : ----- : -
AOTVOKIR4DL10*01    : ----- : -
AOTVOKIR3DL10*01v1  : ----- : -
AOTVOKIR4DS10*01v2  : ----- : -
AOTVOKIR3DS10*01v3  : ----- : -
AOTVOKIR3DS10*01v4  : ----- : -

```

```

          5040      *      5060      *      5080      *      5100      *      5120      *
BAC_clone_Om      : GCCCACATGCGAGGAGGAGGAAGAGGGGAGTGGGGATTAGAGCAGTGTAGTGGGAGGGAGACTCCGCCAGCCACTGCAGGCTCTGAAGGTGGAGG : 5130
AOTVOKIR3DL4*01   : ----- : -
AOTVOKIR3DL4*02   : ----- : -
AOTVOKIR3DL4*02v1 : ----- : -
AOTVOKIR3DL4*02v2 : ----- : -
AOTVOKIR3DL4*03   : ----- : -
AOTVOKIR3DS4*04   : ----- : -
AOTVOKIR3DS4*04v1 : ----- : -
AOTVOKIR3DS5*01   : ----- : -
AOTVOKIR2DS5*01v1 : ----- : -
AOTVOKIR2DS5*01v2 : ----- : -
AOTVOKIR3DS7*01   : ----- : -
AOTVOKIR3DS7*01v1 : ----- : -
AOTVOKIR3DL8*01   : ----- : -
AOTVOKIR3DL8*01v1 : ----- : -
AOTVOKIR3DS8*01v2 : ----- : -
AOTVOKIR3DL8*02   : ----- : -
AOTVOKIR4DL9*01   : ----- : -
AOTVOKIR4DS9*01v1 : ----- : -
AOTVOKIR3DL9*01v2 : ----- : -
AOTVOKIR4DL9*02   : ----- : -
AOTVOKIR4DL10*01  : ----- : -
AOTVOKIR3DL10*01v1 : ----- : -
AOTVOKIR4DS10*01v2 : ----- : -
AOTVOKIR3DS10*01v3 : ----- : -

```

AOTVOKIR3DS10\*01v4 : ----- : -

5140 \* 5160 \* 5180 \* 5200 \* 5220

BAC\_clone\_Om : ACGGCCAGGAGCCATGCATGCAGGTGGCCTCTAGGGGCTGGAGAAGTCAAGGGAAGTCTCCCTGAGTCTCCAGAGGGGACGCAGCCCTGC : 5225

AOTVOKIR3DL4\*01 : ----- : -

AOTVOKIR3DL4\*02 : ----- : -

AOTVOKIR3DL4\*02v1 : ----- : -

AOTVOKIR3DL4\*02v2 : ----- : -

AOTVOKIR3DL4\*03 : ----- : -

AOTVOKIR3DS4\*04 : ----- : -

AOTVOKIR3DS4\*04v1 : ----- : -

AOTVOKIR3DS5\*01 : ----- : -

AOTVOKIR2DS5\*01v1 : ----- : -

AOTVOKIR2DS5\*01v2 : ----- : -

AOTVOKIR3DS7\*01 : ----- : -

AOTVOKIR3DS7\*01v1 : ----- : -

AOTVOKIR3DL8\*01 : ----- : -

AOTVOKIR3DL8\*01v1 : ----- : -

AOTVOKIR3DS8\*01v2 : ----- : -

AOTVOKIR3DL8\*02 : ----- : -

AOTVOKIR4DL9\*01 : ----- : -

AOTVOKIR4DS9\*01v1 : ----- : -

AOTVOKIR3DL9\*01v2 : ----- : -

AOTVOKIR4DL9\*02 : ----- : -

AOTVOKIR4DL10\*01 : ----- : -

AOTVOKIR3DL10\*01v1 : ----- : -

AOTVOKIR4DS10\*01v2 : ----- : -

AOTVOKIR3DS10\*01v3 : ----- : -

AOTVOKIR3DS10\*01v4 : ----- : -

\* 5240 \* 5260 \* 5280 \* 5300 \* 5320

BAC\_clone\_Om : AGATGCCCTGATTTTAGCCATGGGAGAACTGGGTCCGATTTCTGTCTCCAGAAGTGGGAGGGCTCAGTGTGTTCTTCTGCTGCCGTATTGTGA : 5320

AOTVOKIR3DL4\*01 : ----- : -

AOTVOKIR3DL4\*02 : ----- : -

AOTVOKIR3DL4\*02v1 : ----- : -

AOTVOKIR3DL4\*02v2 : ----- : -

AOTVOKIR3DL4\*03 : ----- : -

AOTVOKIR3DS4\*04 : ----- : -

AOTVOKIR3DS4\*04v1 : ----- : -

AOTVOKIR3DS5\*01 : ----- : -

AOTVOKIR2DS5\*01v1 : ----- : -

AOTVOKIR2DS5\*01v2 : ----- : -

AOTVOKIR3DS7\*01 : ----- : -

AOTVOKIR3DS7\*01v1 : ----- : -

```

AOTVOKIR3DL8*01      : ----- : -
AOTVOKIR3DL8*01v1    : ----- : -
AOTVOKIR3DS8*01v2    : ----- : -
AOTVOKIR3DL8*02      : ----- : -
AOTVOKIR4DL9*01      : ----- : -
AOTVOKIR4DS9*01v1    : ----- : -
AOTVOKIR3DL9*01v2    : ----- : -
AOTVOKIR4DL9*02      : ----- : -
AOTVOKIR4DL10*01     : ----- : -
AOTVOKIR3DL10*01v1   : ----- : -
AOTVOKIR4DS10*01v2   : ----- : -
AOTVOKIR3DS10*01v3   : ----- : -
AOTVOKIR3DS10*01v4   : ----- : -

```

```

                *      5340          *      5360          *      5380          *      5400          *
BAC_clone_Om      : TAATTTTCTACAGCAGCAACAGGACACAACACAGGAACCCAGGGAAAGGACAAGTCAAGAAACCACACCAGGAGAAGGGTGGCCACCCCAAGATC : 5415
AOTVOKIR3DL4*01   : ----- : -
AOTVOKIR3DL4*02   : ----- : -
AOTVOKIR3DL4*02v1 : ----- : -
AOTVOKIR3DL4*02v2 : ----- : -
AOTVOKIR3DL4*03   : ----- : -
AOTVOKIR3DS4*04   : ----- : -
AOTVOKIR3DS4*04v1 : ----- : -
AOTVOKIR3DS5*01   : ----- : -
AOTVOKIR2DS5*01v1 : ----- : -
AOTVOKIR2DS5*01v2 : ----- : -
AOTVOKIR3DS7*01   : ----- : -
AOTVOKIR3DS7*01v1 : ----- : -
AOTVOKIR3DL8*01   : ----- : -
AOTVOKIR3DL8*01v1 : ----- : -
AOTVOKIR3DS8*01v2 : ----- : -
AOTVOKIR3DL8*02   : ----- : -
AOTVOKIR4DL9*01   : ----- : -
AOTVOKIR4DS9*01v1 : ----- : -
AOTVOKIR3DL9*01v2 : ----- : -
AOTVOKIR4DL9*02   : ----- : -
AOTVOKIR4DL10*01  : ----- : -
AOTVOKIR3DL10*01v1 : ----- : -
AOTVOKIR4DS10*01v2 : ----- : -
AOTVOKIR3DS10*01v3 : ----- : -
AOTVOKIR3DS10*01v4 : ----- : -

```

```

                5420          *      5440          *      5460          *      5480          *      5500          *
BAC_clone_Om      : AGCAAGGGGGGGATGCTGAGGCCACCACCAGGCTCGATCCTCATAGGGAGGGGTTCGATGCTCCTGGAACCAGCACCAGGGGCCGCCTATGGAAGC : 5510

```

```

AOTVOKIR3DL4*01 : ----- : -
AOTVOKIR3DL4*02 : ----- : -
AOTVOKIR3DL4*02v1 : ----- : -
AOTVOKIR3DL4*02v2 : ----- : -
AOTVOKIR3DL4*03 : ----- : -
AOTVOKIR3DS4*04 : ----- : -
AOTVOKIR3DS4*04v1 : ----- : -
AOTVOKIR3DS5*01 : ----- : -
AOTVOKIR2DS5*01v1 : ----- : -
AOTVOKIR2DS5*01v2 : ----- : -
AOTVOKIR3DS7*01 : ----- : -
AOTVOKIR3DS7*01v1 : ----- : -
AOTVOKIR3DL8*01 : ----- : -
AOTVOKIR3DL8*01v1 : ----- : -
AOTVOKIR3DS8*01v2 : ----- : -
AOTVOKIR3DL8*02 : ----- : -
AOTVOKIR4DL9*01 : ----- : -
AOTVOKIR4DS9*01v1 : ----- : -
AOTVOKIR3DL9*01v2 : ----- : -
AOTVOKIR4DL9*02 : ----- : -
AOTVOKIR4DL10*01 : ----- : -
AOTVOKIR3DL10*01v1 : ----- : -
AOTVOKIR4DS10*01v2 : ----- : -
AOTVOKIR3DS10*01v3 : ----- : -
AOTVOKIR3DS10*01v4 : ----- : -

```

```

                    5520          *          5540          *          5560          *          5580          *          5600
BAC_clone_Om      : CGGGACCATGGAGAAGCACAGACATGGCAGGAGAGGCTCCCAGTCCCCACCAGGAACAGGGTGTGTGGACACTGCTGCCCCGCTTACTCATCAGT : 5605
AOTVOKIR3DL4*01  : ----- : -
AOTVOKIR3DL4*02  : ----- : -
AOTVOKIR3DL4*02v1 : ----- : -
AOTVOKIR3DL4*02v2 : ----- : -
AOTVOKIR3DL4*03  : ----- : -
AOTVOKIR3DS4*04  : ----- : -
AOTVOKIR3DS4*04v1 : ----- : -
AOTVOKIR3DS5*01  : ----- : -
AOTVOKIR2DS5*01v1 : ----- : -
AOTVOKIR2DS5*01v2 : ----- : -
AOTVOKIR3DS7*01  : ----- : -
AOTVOKIR3DS7*01v1 : ----- : -
AOTVOKIR3DL8*01  : ----- : -
AOTVOKIR3DL8*01v1 : ----- : -
AOTVOKIR3DS8*01v2 : ----- : -
AOTVOKIR3DL8*02  : ----- : -
AOTVOKIR4DL9*01  : ----- : -

```

```

AOTVOKIR4DS9*01v1 : ----- : -
AOTVOKIR3DL9*01v2 : ----- : -
AOTVOKIR4DL9*02   : ----- : -
AOTVOKIR4DL10*01  : ----- : -
AOTVOKIR3DL10*01v1 : ----- : -
AOTVOKIR4DS10*01v2 : ----- : -
AOTVOKIR3DS10*01v3 : ----- : -
AOTVOKIR3DS10*01v4 : ----- : -

```

```

          *      5620          *      5640          *      5660          *      5680          *      5700
BAC_clone_Om : TCATACCTCCTGCCAGGGATTCCAATTTGTCCAAAACACATTGAACCAGGCTGTTTCAGATCCTGGACGTGCAGCCTGTCGTGGCTCCTCTTCCAC : 5700
AOTVOKIR3DL4*01 : ----- : -
AOTVOKIR3DL4*02 : ----- : -
AOTVOKIR3DL4*02v1 : ----- : -
AOTVOKIR3DL4*02v2 : ----- : -
AOTVOKIR3DL4*03 : ----- : -
AOTVOKIR3DS4*04 : ----- : -
AOTVOKIR3DS4*04v1 : ----- : -
AOTVOKIR3DS5*01 : ----- : -
AOTVOKIR2DS5*01v1 : ----- : -
AOTVOKIR2DS5*01v2 : ----- : -
AOTVOKIR3DS7*01 : ----- : -
AOTVOKIR3DS7*01v1 : ----- : -
AOTVOKIR3DL8*01 : ----- : -
AOTVOKIR3DL8*01v1 : ----- : -
AOTVOKIR3DS8*01v2 : ----- : -
AOTVOKIR3DL8*02 : ----- : -
AOTVOKIR4DL9*01 : ----- : -
AOTVOKIR4DS9*01v1 : ----- : -
AOTVOKIR3DL9*01v2 : ----- : -
AOTVOKIR4DL9*02 : ----- : -
AOTVOKIR4DL10*01 : ----- : -
AOTVOKIR3DL10*01v1 : ----- : -
AOTVOKIR4DS10*01v2 : ----- : -
AOTVOKIR3DS10*01v3 : ----- : -
AOTVOKIR3DS10*01v4 : ----- : -

```

```

          *      5720          *      5740          *      5760          *      5780          *
BAC_clone_Om : CCTCACATGGACAGGAAGAAACAGATTAGTGGGAAACAGAAACAGCTCAAGGGATGAGGCTGAGCCCAGTGGGAAGGGAGTCAGGGGCTGCTAGA : 5795
AOTVOKIR3DL4*01 : ----- : -
AOTVOKIR3DL4*02 : ----- : -
AOTVOKIR3DL4*02v1 : ----- : -
AOTVOKIR3DL4*02v2 : ----- : -
AOTVOKIR3DL4*03 : ----- : -

```

```

AOTVOKIR3DS4*04      : ----- : -
AOTVOKIR3DS4*04v1   : ----- : -
AOTVOKIR3DS5*01     : ----- : -
AOTVOKIR2DS5*01v1   : ----- : -
AOTVOKIR2DS5*01v2   : ----- : -
AOTVOKIR3DS7*01     : ----- : -
AOTVOKIR3DS7*01v1   : ----- : -
AOTVOKIR3DL8*01     : ----- : -
AOTVOKIR3DL8*01v1   : ----- : -
AOTVOKIR3DS8*01v2   : ----- : -
AOTVOKIR3DL8*02     : ----- : -
AOTVOKIR4DL9*01     : ----- : -
AOTVOKIR4DS9*01v1   : ----- : -
AOTVOKIR3DL9*01v2   : ----- : -
AOTVOKIR4DL9*02     : ----- : -
AOTVOKIR4DL10*01    : ----- : -
AOTVOKIR3DL10*01v1  : ----- : -
AOTVOKIR4DS10*01v2  : ----- : -
AOTVOKIR3DS10*01v3  : ----- : -
AOTVOKIR3DS10*01v4  : ----- : -

```

```

          5800      *      5820      *      5840      *      5860      *      5880      *
BAC_clone_Om      : GACAGAGACAGAGAAGAGGGGAGGGGAGACAGAGGGGAGTGACCTGCACCAGGGGTGACGGGCACAGAAAGGAGCACGGGAGACACAGAGAGGGGAGGAG : 5890
AOTVOKIR3DL4*01   : ----- : -
AOTVOKIR3DL4*02   : ----- : -
AOTVOKIR3DL4*02v1 : ----- : -
AOTVOKIR3DL4*02v2 : ----- : -
AOTVOKIR3DL4*03   : ----- : -
AOTVOKIR3DS4*04   : ----- : -
AOTVOKIR3DS4*04v1 : ----- : -
AOTVOKIR3DS5*01   : ----- : -
AOTVOKIR2DS5*01v1 : ----- : -
AOTVOKIR2DS5*01v2 : ----- : -
AOTVOKIR3DS7*01   : ----- : -
AOTVOKIR3DS7*01v1 : ----- : -
AOTVOKIR3DL8*01   : ----- : -
AOTVOKIR3DL8*01v1 : ----- : -
AOTVOKIR3DS8*01v2 : ----- : -
AOTVOKIR3DL8*02   : ----- : -
AOTVOKIR4DL9*01   : ----- : -
AOTVOKIR4DS9*01v1 : ----- : -
AOTVOKIR3DL9*01v2 : ----- : -
AOTVOKIR4DL9*02   : ----- : -
AOTVOKIR4DL10*01  : ----- : -
AOTVOKIR3DL10*01v1 : ----- : -

```

AOTVOKIR4DS10\*01v2 : ----- : -  
 AOTVOKIR3DS10\*01v3 : ----- : -  
 AOTVOKIR3DS10\*01v4 : ----- : -

5900 \* 5920 \* 5940 \* 5960 \* 5980  
 BAC\_clone\_Om : AGAGTCAGACACCGGGGAGGGGAAGCCTCACTCATTCCAGGTCCCATCGATGGGAAGACAAAGGGAGATGCCTTCTAAACTCACAATATTTTTTC : 5985  
 AOTVOKIR3DL4\*01 : ----- : -  
 AOTVOKIR3DL4\*02 : ----- : -  
 AOTVOKIR3DL4\*02v1 : ----- : -  
 AOTVOKIR3DL4\*02v2 : ----- : -  
 AOTVOKIR3DL4\*03 : ----- : -  
 AOTVOKIR3DS4\*04 : ----- : -  
 AOTVOKIR3DS4\*04v1 : ----- : -  
 AOTVOKIR3DS5\*01 : ----- : -  
 AOTVOKIR2DS5\*01v1 : ----- : -  
 AOTVOKIR2DS5\*01v2 : ----- : -  
 AOTVOKIR3DS7\*01 : ----- : -  
 AOTVOKIR3DS7\*01v1 : ----- : -  
 AOTVOKIR3DL8\*01 : ----- : -  
 AOTVOKIR3DL8\*01v1 : ----- : -  
 AOTVOKIR3DS8\*01v2 : ----- : -  
 AOTVOKIR3DL8\*02 : ----- : -  
 AOTVOKIR4DL9\*01 : ----- : -  
 AOTVOKIR4DS9\*01v1 : ----- : -  
 AOTVOKIR3DL9\*01v2 : ----- : -  
 AOTVOKIR4DL9\*02 : ----- : -  
 AOTVOKIR4DL10\*01 : ----- : -  
 AOTVOKIR3DL10\*01v1 : ----- : -  
 AOTVOKIR4DS10\*01v2 : ----- : -  
 AOTVOKIR3DS10\*01v3 : ----- : -  
 AOTVOKIR3DS10\*01v4 : ----- : -

**EXON 4**

6000 \* 6020 \* 6040 \* 6060 \* 6080

BAC\_clone\_Om : TTAGGATTCCACAGAAAACCTTCCCTCCTGGCCCTCCCAGCTCCCCTGGTGA<sup>AAT</sup>TAGGAGAGACGGTCATCCTGCAGTGTTGGTCAGATGTCAT : 6080  
 AOTVOKIR3DL4\*01 : ---GATTCCACAGAAAACCTTCCCTCCTGGCCCTCCCAGCTCCCCTGGTGA<sup>AAT</sup>CAGGAGAGACCGTCATCCTGCAGTGTTGGTCAGATATCCT : 443  
 AOTVOKIR3DL4\*02 : ---GATTCCACAGAAAACCTTCCCTCCTGGCCCTCCCAGCTCCCCTGGTGA<sup>AAT</sup>CAGGAGAGACCGTCATCCTGCAGTGTTGGTCAGATATCCT : 443  
 AOTVOKIR3DL4\*02v1 : ---GATTCCACAGAAAACCTTCCCTCCTGGCCCTCCCAGCTCCCCTGGTGA<sup>AAT</sup>CAGGAGAGACCGTCATCCTGCAGTGTTGGTCAGATATCCT : 407  
 AOTVOKIR3DL4\*02v2 : ---GATTCCACAGAAAACCTTCCCTCCTGGCCCTCCCAGCTCCCCTGGTGA<sup>AAT</sup>CAGGAGAGACCGTCATCCTGCAGTGTTGGTCAGATATCCT : 443  
 AOTVOKIR3DL4\*03 : ---GATTCCACAGAAAACCTTCCCTCCTGGCCCTCCCAGCTCCCCTGGTGA<sup>AAT</sup>CAGGAGAGACCGTCATCCTGCAGTGTTGGTCAGATATCCT : 443  
 AOTVOKIR3DS4\*04 : ---GATTCCACAGAAAACCTTCCCTCCTGGCCCTCCCAGCTCCCCTGGTGA<sup>AAT</sup>CAGGAGAGACCGTCATCCTGCAGTGTTGGTCAGATATCCT : 443  
 AOTVOKIR3DS4\*04v1 : ---GATTCCACAGAAAACCTTCCCTCCTGGCCCTCCCAGCTCCCCTGGTGA<sup>AAT</sup>CAGGAGAGACCGTCATCCTGCAGTGTTGGTCAGATATCCT : 443  
 AOTVOKIR3DS5\*01 : ---GATTCCACAGAAAACCTTCCCTCCTGGCCCTCCCAGCTCCCCTGGTGA<sup>AAT</sup>CAGGACAGACGGTCATCCTGCAGTGTTGGTCAGATATCAT : 443  
 AOTVOKIR2DS5\*01v1 : ---GATTCCACAGAAAACCTTCCCTCCTGGCCCTCCCAGCTCCCCTGGTGA<sup>AAT</sup>CAGGACAGACGGTCATCCTGCAGTGTTGGTCAGATATCAT : 245  
 AOTVOKIR2DS5\*01v2 : ---GATTCCACAGAAAACCTTCCCTCCTGGCCCTCCCAGCTCCCCTGGTGA<sup>AAT</sup>CAGGACAGACGGTCATCCTGCAGTGTTGGTCAGATATCAT : 158



AOTVOKIR3DS7\*01 : ----GATTCCACAGAAAACCTTCCCTCCTGGCCCTCCCAGCTCCCCTGGTGAATCAGGAGAGAGGGTCATCCTGCAGTGTGGTTCAGATATCAT : 443  
AOTVOKIR3DS7\*01v1 : ----GATTCCACAGAAAACCTTCCCTCCTGGCCCTCCCAGCTCCCCTGGTGAATCAGGAGAGAGGGTCATCCTGCAGTGTGGTTCAGATATCAT : 443  
AOTVOKIR3DL8\*01 : ----GATTCCACAGAAAACCTTCCCTCCTGGCCCTCCCAGCTCCCCTTGTGGCATCAGGAGAGACGGTCATCCTGCAGTGTGGTTCAGATATCAT : 443  
AOTVOKIR3DL8\*01v1 : ----GATTCCACAGAAAACCTTCCCTCCTGGCCCTCCCAGCTCCCCTTGTGGCATCAGGAGAGACGGTCATCCTGCAGTGTGGTTCAGATATCAT : 443  
AOTVOKIR3DS8\*01v2 : ----GATTCCACAGAAAACCTTCCCTCCTGGCCCTCCCAGCTCCCCTTGTGGCATCAGGAGAGACGGTCATCCTGCAGTGTGGTTCAGATATCAT : 443  
AOTVOKIR3DL8\*02 : ----GATTCCACAGAAAACCTTCCCTCCTGGCCCTCCCAGCTCCCCTTGTGGCATCAGGAGAGACGGTCATCCTGCAGTGTGGTTCAGATATCAT : 443  
AOTVOKIR4DL9\*01 : ----GACTCCACAGAAAACCTTCCCTTCTGGCCATCCCAGCTCCCCTGGTGACATCAGGCAAGACGGTCATCCTGCAATGTTGGTTCAGATATCAT : 728  
AOTVOKIR4DS9\*01v1 : ----GACTCCACAGAAAACCTTCCCTTCTGGCCATCCCAGCTCCCCTGGTGACATCAGGCAAGACGGTCATCCTGCAATGTTGGTTCAGATATCAT : 728  
AOTVOKIR3DL9\*01v2 : ----GACTCCACAGAAAACCTTCCCTTCTGGCCATCCCAGCTCCCCTGGTGACATCAGGCAAGACGGTCATCCTGCAATGTTGGTTCAGATATCAT : 530  
AOTVOKIR4DL9\*02 : ----GACTCCACAGAAAACCTTCCCTTCTGGCCATCCCAGCTCCCCTGGTGACATCAGGCAAGACGGTCATCCTGCAATGTTGGTTCAGATATCAT : 728  
AOTVOKIR4DL10\*01 : ----GATTCCACAGAAAACCTTCCCTTCTGGCCCTCCCAGCTCCCCTGGTGACATCAGGAAGACGGTCATCCTGCAGTGTGGTTCAGATATCAT : 728  
AOTVOKIR3DL10\*01v1 : ----GATTCCACAGAAAACCTTCCCTTCTGGCCCTCCCAGCTCCCCTGGTGACATCAGGAAGACGGTCATCCTGCAGTGTGGTTCAGATATCAT : 527  
AOTVOKIR4DS10\*01v2 : ----GATTCCACAGAAAACCTTCCCTTCTGGCCCTCCCAGCTCCCCTGGTGACATCAGGAAGACGGTCATCCTGCAGTGTGGTTCAGATATCAT : 728  
AOTVOKIR3DS10\*01v3 : ----GATTCCACAGAAAACCTTCCCTTCTGGCCCTCCCAGCTCCCCTGGTGACATCAGGAAGACGGTCATCCTGCAGTGTGGTTCAGATATCAT : 443  
AOTVOKIR3DS10\*01v4 : ----GATTCCACAGAAAACCTTCCCTTCTGGCCCTCCCAGCTCCCCTGGTGACATCAGGAAGACGGTCATCCTGCAGTGTGGTTCAGATATCAT : 443  
GATTCACAGAAAACCTTCCCTCTGGCCCTCCCAGCTCCCCTGGTGAATCAGGAGAGAc GTCATCCTGCAGTGTGGTTCAGATATCAT T

\* 6100 \* 6120 \* 6140 \* 6160 \*  
BAC\_clone\_Om : GTCTGAGCACTTCCCTTCTGCACAGAGAGGGGATGTCTGAGGACACTTGTGCCTCGTTGGAGAGCCCCATGATGGGGGCTCCCAGGCCAATTCT : 6175  
AOTVOKIR3DL4\*01 : GTTTGAACACTTATTTCTGCACAGAAAAGGGTTCACTGAGGACCTCTTGTGCCTCGTTGGAGAGCCCCATGATGGGGGCTCCCAGGCCAATTCT : 538  
AOTVOKIR3DL4\*02 : GTTTGAACACTTATTTCTGCACAGAAAAGGGTTCACTGAGGACCTCTTGTGCCTCGTTGGAGAGCCCCGTGATGGGGGCTCCCAGGCCAATTCT : 538  
AOTVOKIR3DL4\*02v1 : GTTTGAACACTTATTTCTGCACAGAAAAGGGTTCACTGAGGACCTCTTGTGCCTCGTTGGAGAGCCCCGTGATGGGGGCTCCCAGGCCAATTCT : 502  
AOTVOKIR3DL4\*02v2 : GTTTGAACACTTATTTCTGCACAGAAAAGGGTTCACTGAGGACCTCTTGTGCCTCGTTGGAGAGCCCCGTGATGGGGGCTCCCAGGCCAATTCT : 538  
AOTVOKIR3DL4\*03 : GTTTGAACACTTATTTCTGCACAGAAAAGGGTTCACTGAGGACCTCTTGTGCCTCGTTGGAGAGCCCCATGATGGGGGCTCCCAGGCCAATTCT : 538  
AOTVOKIR3DS4\*04 : GTTTGAACACTTATTTCTGCACAGAAAAGGGTTCACTGAGGACCTCTTGTGCCTCGTTGGAGAGCCCCATGATGGGGGCTCCCAGGCCAATTCT : 538  
AOTVOKIR3DS4\*04v1 : GTTTGAACACTTATTTCTGCACAGAAAAGGGTTCACTGAGGACCTCTTGTGCCTCGTTGGAGAGCCCCATGATGGGGGCTCCCAGGCCAATTCT : 538  
AOTVOKIR3DS5\*01 : GTCTGAGCACTTCCCTTCTGCACGGAAAGGGGAGTCATTGAGGACCTCTTACACCTTGTGGAGAGCCCCGTGATGGGGGCTCCCAGGCCAATTCT : 538  
AOTVOKIR2DS5\*01v1 : GTCTGAGCACTTCCCTTCTGCACGGAAAGGGGAGTCATTGAGGACCTCTTACACCTTGTGGAGAGCCCCGTGATGGGGGCTCCCAGGCCAATTCT : 340  
AOTVOKIR2DS5\*01v2 : GTCTGAGCACTTCCCTTCTGCACGGAAAGGGGAGTCATTGAGGACCTCTTACACCTTGTGGAGAGCCCCGTGATGGGGGCTCCCAGGCCAATTCT : 253  
AOTVOKIR3DS7\*01 : GTCTGAGTACTTCCCTTCTGCACAGGCAAGGGGTCACTGAGGACCTCTTGCCTCGTTGGAGAGTCCCCTGATGGAGGCTCCCAGGCCAATTCT : 538  
AOTVOKIR3DS7\*01v1 : GTCTGAGTACTTCCCTTCTGCACAGGCAAGGGGTCACTGAGGACCTCTTGCCTCGTTGGAGAGTCCCCTGATGGAGGCTCCCAGGCCAATTCT : 538  
AOTVOKIR3DL8\*01 : GTCTGAGCACTTCCCTTCTGCACGGAAAGGGGATCACTGAGGACCTCTTGCCTCGTTGGAGAGCCCCATAAATGGGGGCTCCCAGGCCAATTCT : 538  
AOTVOKIR3DL8\*01v1 : GTCTGAGCACTTCCCTTCTGCACGGAAAGGGGATCACTGAGGACCTCTTGCCTCGTTGGAGAGCCCCATAAATGGGGGCTCCCAGGCCAATTCT : 538  
AOTVOKIR3DS8\*01v2 : GTCTGAGCACTTCCCTTCTGCACGGAAAGGGGATCACTGAGGACCTCTTGCCTCGTTGGAGAGCCCCATAAATGGGGGCTCCCAGGCCAATTCT : 538  
AOTVOKIR3DL8\*02 : GTCTGAGCACTTCCCTTCTGCACGGAAAGGGGATCACTGAGGACCTCTTGCCTCGTTGGAGAGCCCCATAAATGGGGGCTCCCAGGCCAATTCT : 538  
AOTVOKIR4DL9\*01 : GTCTGAGCACTTCCCTTCTGCACAGAAAAGGGGTTCACTGAGGACCTCTTGCCTCGTTGGAGAGTCCCCTGATGGAGGCTCCCAGGCCAATTCT : 823  
AOTVOKIR4DS9\*01v1 : GTCTGAGCACTTCCCTTCTGCACAGAAAAGGGGTTCACTGAGGACCTCTTGCCTCGTTGGAGAGTCCCCTGATGGAGGCTCCCAGGCCAATTCT : 823  
AOTVOKIR3DL9\*01v2 : GTCTGAGCACTTCCCTTCTGCACAGAAAAGGGGTTCACTGAGGACCTCTTGCCTCGTTGGAGAGTCCCCTGATGGAGGCTCCCAGGCCAATTCT : 625  
AOTVOKIR4DL9\*02 : GTCTGAGCACTTCCCTTCTGCACAGAAAAGGGGTTCACTGAGGACCTCTTGCCTCGTTGGAGAGTCCCCTGATGGAGGCTCCCAGGCCAATTCT : 823  
AOTVOKIR4DL10\*01 : GTCTGAGCACTTCCCTTCTGCACAGAAAAGGGGTTCACTGAGGATCTCTTGCCTCGTTGGAGAGTCCCCTGATGGAGGCTCCCAGGCCAATTCT : 823  
AOTVOKIR3DL10\*01v1 : GTCTGAGCACTTCCCTTCTGCACAGAAAAGGGGTTCACTGAGGATCTCTTGCCTCGTTGGAGAGTCCCCTGATGGAGGCTCCCAGGCCAATTCT : 622  
AOTVOKIR4DS10\*01v2 : GTCTGAGCACTTCCCTTCTGCACAGAAAAGGGGTTCACTGAGGATCTCTTGCCTCGTTGGAGAGTCCCCTGATGGAGGCTCCCAGGCCAATTCT : 823  
AOTVOKIR3DS10\*01v3 : GTCTGAGCACTTCCCTTCTGCACAGAAAAGGGGTTCACTGAGGATCTCTTGCCTCGTTGGAGAGTCCCCTGATGGAGGCTCCCAGGCCAATTCT : 538  
AOTVOKIR3DS10\*01v4 : GTCTGAGCACTTCCCTTCTGCACAGAAAAGGGGTTCACTGAGGATCTCTTGCCTCGTTGGAGAGTCCCCTGATGGAGGCTCCCAGGCCAATTCT : 538  
GT TGA cACTT TTCTGCAC GaaA GGg TcactGAGGAcctCTTg gCCTc TGGAGAG CCC TgAtGG GGCTCCCAGGCCAactTct

|                    | 6180          | *           | 6200                                                                          | * | 6220 | * | 6240 | * | 6260 | * |  |
|--------------------|---------------|-------------|-------------------------------------------------------------------------------|---|------|---|------|---|------|---|--|
| BAC_clone_Om       | : CCATAGGTCCC | ATGACA      | ACTGACCTTGCAGGGACCTACAGATGCTACGGTTCTGTTACTCACTCCCCTATGAGTGGTCAGCTCCCAGTGACCCC | : | 6270 |   |      |   |      |   |  |
| AOTVOKIR3DL4*01    | : CCATGGGTCCC | ATGATGCCTG  | CCCTTGCAGGGACCTACAGATGCTACGGTTCTTTCACTCACTCCCCTATGAGTGGTCAGCTCCCAGTGACCCC     | : | 633  |   |      |   |      |   |  |
| AOTVOKIR3DL4*02    | : CCATGGGTCCC | ATGATGCCTG  | CCCTTGCAGGGACCTACAGATGCTACGGTTCTTTCACTCACTCCCCTATGAGTGGTCAGCTCCCAGTGACCCC     | : | 633  |   |      |   |      |   |  |
| AOTVOKIR3DL4*02v1  | : CCATGGGTCCC | ATGATGCCTG  | CCCTTGCAGGGACCTACAGATGCTACGGTTCTTTCACTCACTCCCCTATGAGTGGTCAGCTCCCAGTGACCCC     | : | 597  |   |      |   |      |   |  |
| AOTVOKIR3DL4*02v2  | : CCATGGGTCCC | ATGATGCCTG  | CCCTTGCAGGGACCTACAGATGCTACGGTTCTTTCACTCACTCCCCTATGAGTGGTCAGCTCCCAGTGACCCC     | : | 633  |   |      |   |      |   |  |
| AOTVOKIR3DL4*03    | : CCATGGGTCCC | ATGATGCCTG  | CCCTTGCAGGGACCTACAGATGCTACGGTTCTTTCACTCACTCCCCTATGAGTGGTCAGCTCCCAGTGACCCC     | : | 633  |   |      |   |      |   |  |
| AOTVOKIR3DS4*04    | : CCATGGGTCCC | ATGATGCCTG  | CCCTTGCAGGGACCTACAGATGCTACGGTTCTTTCACTCACTCCCCTATGAGTGGTCAGCTCCCAGTGACCCC     | : | 633  |   |      |   |      |   |  |
| AOTVOKIR3DS4*04v1  | : CCATGGGTCCC | ATGATGCCTG  | CCCTTGCAGGGACCTACAGATGCTACGGTTCTTTCACTCACTCCCCTATGAGTGGTCAGCTCCCAGTGACCCC     | : | 633  |   |      |   |      |   |  |
| AOTVOKIR3DS5*01    | : CCATAGGTCCC | ATGATGACTG  | CCCTTGCAGGGACCTACAGATGCTACGGTTCTGTCACTCACTCCCCTATGGTGGTCGGCTCCCAGTGACCCC      | : | 633  |   |      |   |      |   |  |
| AOTVOKIR2DS5*01v1  | : CCATAGGTCCC | ATGATGACTG  | CCCTTGCAGGGACCTACAGATGCTACGGTTCTGTCACTCACTCCCCTATGAGTGGTCGGCTCCCAGTGACCCC     | : | 435  |   |      |   |      |   |  |
| AOTVOKIR2DS5*01v2  | : CCATAGGTCCC | ATGATGACTG  | CCCTTGCAGGGACCTACAGATGCTACGGTTCTGTCACTCACTCCCCTATGAGTGGTCGGCTCCCAGTGACCCC     | : | 348  |   |      |   |      |   |  |
| AOTVOKIR3DS7*01    | : CCATAGGTCCC | ATGACA      | ACTGACCTTGCAGGGACCTACAGATGCTACAGTTCTGTGACTCACTCCCCTATGAGTGGTCAGCTCCCAGTGACCCC | : | 633  |   |      |   |      |   |  |
| AOTVOKIR3DS7*01v1  | : CCATAGGTCCC | ATGACA      | ACTGACCTTGCAGGGACCTACAGATGCTACAGTTCTGTGACTCACTCCCCTATGAGTGGTCAGCTCCCAGTGACCCC | : | 633  |   |      |   |      |   |  |
| AOTVOKIR3DL8*01    | : CCATAGGTCCC | ATGACGACTG  | CCCTTGCAGGGACCTACAGATGCTGCCGTTCTGTCACTCACTCCCCTATGAGTGGTCAGCTCCCAGTGACCCC     | : | 633  |   |      |   |      |   |  |
| AOTVOKIR3DL8*01v1  | : CCATAGGTCCC | ATGACGACTG  | CCCTTGCAGGGACCTACAGATGCTGCCGTTCTGTCACTCACTCCCCTATGAGTGGTCAGCTCCCAGTGACCCC     | : | 633  |   |      |   |      |   |  |
| AOTVOKIR3DS8*01v2  | : CCATAGGTCCC | ATGACGACTG  | CCCTTGCAGGGACCTACAGATGCTGCCGTTCTGTCACTCACTCCCCTATGAGTGGTCAGCTCCCAGTGACCCC     | : | 633  |   |      |   |      |   |  |
| AOTVOKIR3DL8*02    | : CCATAGGTCCC | ATGACGACTG  | CCCTTGCAGGGACCTACAGATGCTGCCGTTCTGTCACTCACTCCCCTATGAGTGGTCAGCTCCCAGTGACCCC     | : | 633  |   |      |   |      |   |  |
| AOTVOKIR4DL9*01    | : CCATAGGTCCC | ATGACGCTCTG | CCCTTGCAGGGACCTACAGATGCTACGGTTCTGTCACTCACTCCCGCTATGAGTGGTCAGCTCCCAGTGACCCCT   | : | 918  |   |      |   |      |   |  |
| AOTVOKIR4DS9*01v1  | : CCATAGGTCCC | ATGACGCTCTG | CCCTTGCAGGGACCTACAGATGCTACGGTTCTGTCACTCACTCCCGCTATGAGTGGTCAGCTCCCAGTGACCCCT   | : | 918  |   |      |   |      |   |  |
| AOTVOKIR3DL9*01v2  | : CCATAGGTCCC | ATGACGCTCTG | CCCTTGCAGGGACCTACAGATGCTACGGTTCTGTCACTCACTCCCGCTATGAGTGGTCAGCTCCCAGTGACCCCT   | : | 720  |   |      |   |      |   |  |
| AOTVOKIR4DL9*02    | : CCATAGGTCCC | ATGACGCTCTG | CCCTTGCAGGGACCTACAGATGCTACGGTTCTGTCACTCACTCCCGCTATGAGTGGTCAGCTCCCAGTGACCCCT   | : | 918  |   |      |   |      |   |  |
| AOTVOKIR4DL10*01   | : CCATAGGTCCC | ATGACGACTG  | CCCTTGCAGGGACCTACAGATGCTACGGTTCTGTCACTCACTCCCCTATGAGTGGTCAGCTCCCAGTGACCCCT    | : | 918  |   |      |   |      |   |  |
| AOTVOKIR3DL10*01v1 | : CCATAGGTCCC | ATGACGACTG  | CCCTTGCAGGGACCTACAGATGCTACGGTTCTGTCACTCACTCCCCTATGAGTGGTCAGCTCCCAGTGACCCCT    | : | 717  |   |      |   |      |   |  |
| AOTVOKIR4DS10*01v2 | : CCATAGGTCCC | ATGACGACTG  | CCCTTGCAGGGACCTACAGATGCTACGGTTCTGTCACTCACTCCCCTATGAGTGGTCAGCTCCCAGTGACCCCT    | : | 918  |   |      |   |      |   |  |
| AOTVOKIR3DS10*01v3 | : CCATAGGTCCC | ATGACGACTG  | CCCTTGCAGGGACCTACAGATGCTACGGTTCTGTCACTCACTCCCCTATGAGTGGTCAGCTCCCAGTGACCCCT    | : | 633  |   |      |   |      |   |  |
| AOTVOKIR3DS10*01v4 | : CCATAGGTCCC | ATGACGACTG  | CCCTTGCAGGGACCTACAGATGCTACGGTTCTGTCACTCACTCCCCTATGAGTGGTCAGCTCCCAGTGACCCCT    | : | 633  |   |      |   |      |   |  |

CCAT GGTCCCATGA g CTGcCCTTGCAGGGACCTACAGATGCTaC GTTCT TcACTCACTCCCcCTATGaGTGGTCaGCTCCCAGTGACCC

|                   | 6280          |          | 6300                                                                        | * | 6320 | * | 6340 | * | 6360 |  |
|-------------------|---------------|----------|-----------------------------------------------------------------------------|---|------|---|------|---|------|--|
| BAC_clone_Om      | : CTGGATATCGT | GATCACAG | GTGAGAGTGTCCAGACATTCTTCTCATTGTCACTGGGACACAGAGTGAATGATCCAGGACTTGAAGCCCCAGGTG | : | 6365 |   |      |   |      |  |
| AOTVOKIR3DL4*01   | : CTGGACATCGG | GATCACAG | -----                                                                       | : | 652  |   |      |   |      |  |
| AOTVOKIR3DL4*02   | : CTGGACATCGG | GATCACAG | -----                                                                       | : | 652  |   |      |   |      |  |
| AOTVOKIR3DL4*02v1 | : CTGGACATCGG | GATCACAG | -----                                                                       | : | 616  |   |      |   |      |  |
| AOTVOKIR3DL4*02v2 | : CTGGACATCGG | GATCACAG | -----                                                                       | : | 652  |   |      |   |      |  |
| AOTVOKIR3DL4*03   | : CTGGACATCGG | GATCACAG | -----                                                                       | : | 652  |   |      |   |      |  |
| AOTVOKIR3DS4*04   | : CTGGACATCGG | GATCACAG | -----                                                                       | : | 652  |   |      |   |      |  |
| AOTVOKIR3DS4*04v1 | : CTGGACATCGG | GATCACAG | -----                                                                       | : | 652  |   |      |   |      |  |
| AOTVOKIR3DS5*01   | : CTGGACATTGT | GATCACAG | -----                                                                       | : | 652  |   |      |   |      |  |
| AOTVOKIR2DS5*01v1 | : CTGGACATTGT | GATCACAG | -----                                                                       | : | 454  |   |      |   |      |  |
| AOTVOKIR2DS5*01v2 | : CTGGACATTGT | GATCACAG | -----                                                                       | : | 367  |   |      |   |      |  |
| AOTVOKIR3DS7*01   | : CTGGACATCAT | GATCACAG | -----                                                                       | : | 652  |   |      |   |      |  |
| AOTVOKIR3DS7*01v1 | : CTGGACATCAT | GATCACAG | -----                                                                       | : | 652  |   |      |   |      |  |
| AOTVOKIR3DL8*01   | : CTGGACATCGT | GATCACAG | -----                                                                       | : | 652  |   |      |   |      |  |
| AOTVOKIR3DL8*01v1 | : CTGGACATCGT | GATCACAG | -----                                                                       | : | 652  |   |      |   |      |  |
| AOTVOKIR3DS8*01v2 | : CTGGACATCGT | GATCACAG | -----                                                                       | : | 652  |   |      |   |      |  |

```

AOTVOKIR3DL8*02 : CTGGACATCGTGATCACAG----- : 652
AOTVOKIR4DL9*01 : CTGGACATCGTGATCACAG----- : 937
AOTVOKIR4DS9*01v1 : CTGGACATCGTGATCACAG----- : 937
AOTVOKIR3DL9*01v2 : CTGGACATCGTGATCACAG----- : 739
AOTVOKIR4DL9*02 : CTGGACATCGTGATCACAG----- : 937
AOTVOKIR4DL10*01 : CTGGACATCGTGATCACAG----- : 937
AOTVOKIR3DL10*01v1 : CTGGACATCGTGATCACAG----- : 736
AOTVOKIR4DS10*01v2 : CTGGACATCGTGATCACAG----- : 937
AOTVOKIR3DS10*01v3 : CTGGACATCGTGATCACAG----- : 652
AOTVOKIR3DS10*01v4 : CTGGACATCGTGATCACAG----- : 652
CTGGAcATcg GATCACAG

```

```

* 6380 * 6400 * 6420 * 6440 * 6460
BAC_clone_Om : CTCATGAGGAAAATGAGCGTGGGGTTCTTATGGAGAGAGACTGACTTGGTGAGGTCTGTACCAGCAGAGACAGAGAAAACAGGAGACACAAGTCCA : 6460
AOTVOKIR3DL4*01 : ----- : -
AOTVOKIR3DL4*02 : ----- : -
AOTVOKIR3DL4*02v1 : ----- : -
AOTVOKIR3DL4*02v2 : ----- : -
AOTVOKIR3DL4*03 : ----- : -
AOTVOKIR3DS4*04 : ----- : -
AOTVOKIR3DS4*04v1 : ----- : -
AOTVOKIR3DS5*01 : ----- : -
AOTVOKIR2DS5*01v1 : ----- : -
AOTVOKIR2DS5*01v2 : ----- : -
AOTVOKIR3DS7*01 : ----- : -
AOTVOKIR3DS7*01v1 : ----- : -
AOTVOKIR3DL8*01 : ----- : -
AOTVOKIR3DL8*01v1 : ----- : -
AOTVOKIR3DS8*01v2 : ----- : -
AOTVOKIR3DL8*02 : ----- : -
AOTVOKIR4DL9*01 : ----- : -
AOTVOKIR4DS9*01v1 : ----- : -
AOTVOKIR3DL9*01v2 : ----- : -
AOTVOKIR4DL9*02 : ----- : -
AOTVOKIR4DL10*01 : ----- : -
AOTVOKIR3DL10*01v1 : ----- : -
AOTVOKIR4DS10*01v2 : ----- : -
AOTVOKIR3DS10*01v3 : ----- : -
AOTVOKIR3DS10*01v4 : ----- : -

```

```

* 6480 * 6500 * 6520 * 6540 *
BAC_clone_Om : GACCACATGTCATAACAGAGGACAGACATGGGGGCCATACAGGGAGTGAGAAAAGAGGGAAAGAGGTAGAGGGGACACACAGACAGACAGACATG : 6555
AOTVOKIR3DL4*01 : ----- : -
AOTVOKIR3DL4*02 : ----- : -
AOTVOKIR3DL4*02v1 : ----- : -

```

```

AOTVOKIR3DL4*02v2 : ----- : -
AOTVOKIR3DL4*03   : ----- : -
AOTVOKIR3DS4*04   : ----- : -
AOTVOKIR3DS4*04v1 : ----- : -
AOTVOKIR3DS5*01   : ----- : -
AOTVOKIR2DS5*01v1 : ----- : -
AOTVOKIR2DS5*01v2 : ----- : -
AOTVOKIR3DS7*01   : ----- : -
AOTVOKIR3DS7*01v1 : ----- : -
AOTVOKIR3DL8*01   : ----- : -
AOTVOKIR3DL8*01v1 : ----- : -
AOTVOKIR3DS8*01v2 : ----- : -
AOTVOKIR3DL8*02   : ----- : -
AOTVOKIR4DL9*01   : ----- : -
AOTVOKIR4DS9*01v1 : ----- : -
AOTVOKIR3DL9*01v2 : ----- : -
AOTVOKIR4DL9*02   : ----- : -
AOTVOKIR4DL10*01  : ----- : -
AOTVOKIR3DL10*01v1 : ----- : -
AOTVOKIR4DS10*01v2 : ----- : -
AOTVOKIR3DS10*01v3 : ----- : -
AOTVOKIR3DS10*01v4 : ----- : -

```

```

          6560      *      6580      *      6600      *      6620      *      6640      *
BAC_clone_Om : TCCCAGAGAGAGGTGTCCTTCCATGCTGGCTTTGTTTCAGACACCTGGCACAGGGTAGAGGTTTTATTTCTGCATTTCCACAAAGTGTTCCTGT : 6650
AOTVOKIR3DL4*01 : ----- : -
AOTVOKIR3DL4*02 : ----- : -
AOTVOKIR3DL4*02v1 : ----- : -
AOTVOKIR3DL4*02v2 : ----- : -
AOTVOKIR3DL4*03 : ----- : -
AOTVOKIR3DS4*04 : ----- : -
AOTVOKIR3DS4*04v1 : ----- : -
AOTVOKIR3DS5*01 : ----- : -
AOTVOKIR2DS5*01v1 : ----- : -
AOTVOKIR2DS5*01v2 : ----- : -
AOTVOKIR3DS7*01 : ----- : -
AOTVOKIR3DS7*01v1 : ----- : -
AOTVOKIR3DL8*01 : ----- : -
AOTVOKIR3DL8*01v1 : ----- : -
AOTVOKIR3DS8*01v2 : ----- : -
AOTVOKIR3DL8*02 : ----- : -
AOTVOKIR4DL9*01 : ----- : -
AOTVOKIR4DS9*01v1 : ----- : -
AOTVOKIR3DL9*01v2 : ----- : -
AOTVOKIR4DL9*02 : ----- : -

```

AOTVOKIR4DL10\*01 : ----- : -  
AOTVOKIR3DL10\*01v1 : ----- : -  
AOTVOKIR4DS10\*01v2 : ----- : -  
AOTVOKIR3DS10\*01v3 : ----- : -  
AOTVOKIR3DS10\*01v4 : ----- : -

6660 \* 6680 \* 6700 \* 6720 \* 6740  
BAC\_clone\_Om : ACCAGGAGAACCCAAAGACACCCAGATTTCTGACCTGAGTTGGGCCCTGTGGCCTCAGGCCTTATGGCACCTACAGATGCCGTGTTTATTCTGAC : 6745  
AOTVOKIR3DL4\*01 : ----- : -  
AOTVOKIR3DL4\*02 : ----- : -  
AOTVOKIR3DL4\*02v1 : ----- : -  
AOTVOKIR3DL4\*02v2 : ----- : -  
AOTVOKIR3DL4\*03 : ----- : -  
AOTVOKIR3DS4\*04 : ----- : -  
AOTVOKIR3DS4\*04v1 : ----- : -  
AOTVOKIR3DS5\*01 : ----- : -  
AOTVOKIR2DS5\*01v1 : ----- : -  
AOTVOKIR2DS5\*01v2 : ----- : -  
AOTVOKIR3DS7\*01 : ----- : -  
AOTVOKIR3DS7\*01v1 : ----- : -  
AOTVOKIR3DL8\*01 : ----- : -  
AOTVOKIR3DL8\*01v1 : ----- : -  
AOTVOKIR3DS8\*01v2 : ----- : -  
AOTVOKIR3DL8\*02 : ----- : -  
AOTVOKIR4DL9\*01 : ----- : -  
AOTVOKIR4DS9\*01v1 : ----- : -  
AOTVOKIR3DL9\*01v2 : ----- : -  
AOTVOKIR4DL9\*02 : ----- : -  
AOTVOKIR4DL10\*01 : ----- : -  
AOTVOKIR3DL10\*01v1 : ----- : -  
AOTVOKIR4DS10\*01v2 : ----- : -  
AOTVOKIR3DS10\*01v3 : ----- : -  
AOTVOKIR3DS10\*01v4 : ----- : -

\* 6760 \* 6780 \* 6800 \* 6820 \* 6840  
BAC\_clone\_Om : ACCTCTGCCTTCCGTGCAGTGAGCCGTAATCGTCCCAGGATATTATGGCCCCGGAACACCAACCCCAGTGTGCTGTGTGTACTTGGGGTCCCCA : 6840  
AOTVOKIR3DL4\*01 : ----- : -  
AOTVOKIR3DL4\*02 : ----- : -  
AOTVOKIR3DL4\*02v1 : ----- : -  
AOTVOKIR3DL4\*02v2 : ----- : -  
AOTVOKIR3DL4\*03 : ----- : -  
AOTVOKIR3DS4\*04 : ----- : -  
AOTVOKIR3DS4\*04v1 : ----- : -  
AOTVOKIR3DS5\*01 : ----- : -

```

AOTVOKIR2DS5*01v1 : ----- : -
AOTVOKIR2DS5*01v2 : ----- : -
AOTVOKIR3DS7*01   : ----- : -
AOTVOKIR3DS7*01v1 : ----- : -
AOTVOKIR3DL8*01   : ----- : -
AOTVOKIR3DL8*01v1 : ----- : -
AOTVOKIR3DS8*01v2 : ----- : -
AOTVOKIR3DL8*02   : ----- : -
AOTVOKIR4DL9*01   : ----- : -
AOTVOKIR4DS9*01v1 : ----- : -
AOTVOKIR3DL9*01v2 : ----- : -
AOTVOKIR4DL9*02   : ----- : -
AOTVOKIR4DL10*01  : ----- : -
AOTVOKIR3DL10*01v1 : ----- : -
AOTVOKIR4DS10*01v2 : ----- : -
AOTVOKIR3DS10*01v3 : ----- : -
AOTVOKIR3DS10*01v4 : ----- : -

```

```

                *      6860          *      6880          *      6900          *      6920          *
BAC_clone Om    : GACTGGATTCTGAGGCTCATATTCCTCAACTAATCTCACATACTGTAGCATCACTGAGAGACACAGAGAGAAATCAGGGACATCAGAATGCAAAGAT : 6935
AOTVOKIR3DL4*01 : ----- : -
AOTVOKIR3DL4*02 : ----- : -
AOTVOKIR3DL4*02v1 : ----- : -
AOTVOKIR3DL4*02v2 : ----- : -
AOTVOKIR3DL4*03 : ----- : -
AOTVOKIR3DS4*04 : ----- : -
AOTVOKIR3DS4*04v1 : ----- : -
AOTVOKIR3DS5*01 : ----- : -
AOTVOKIR2DS5*01v1 : ----- : -
AOTVOKIR2DS5*01v2 : ----- : -
AOTVOKIR3DS7*01 : ----- : -
AOTVOKIR3DS7*01v1 : ----- : -
AOTVOKIR3DL8*01 : ----- : -
AOTVOKIR3DL8*01v1 : ----- : -
AOTVOKIR3DS8*01v2 : ----- : -
AOTVOKIR3DL8*02 : ----- : -
AOTVOKIR4DL9*01 : ----- : -
AOTVOKIR4DS9*01v1 : ----- : -
AOTVOKIR3DL9*01v2 : ----- : -
AOTVOKIR4DL9*02 : ----- : -
AOTVOKIR4DL10*01 : ----- : -
AOTVOKIR3DL10*01v1 : ----- : -
AOTVOKIR4DS10*01v2 : ----- : -
AOTVOKIR3DS10*01v3 : ----- : -
AOTVOKIR3DS10*01v4 : ----- : -

```

|                    |      |                                                                                                  |      |   |      |   |      |   |      |   |   |      |
|--------------------|------|--------------------------------------------------------------------------------------------------|------|---|------|---|------|---|------|---|---|------|
|                    | 6940 | *                                                                                                | 6960 | * | 6980 | * | 7000 | * | 7020 | * |   |      |
| BAC_clone_Om       | :    | ATAAACACACACAGAATGAGTCAGGGGAAGGGGATTGAGAACTCACAGACACATAAAGAGAGAGAGAAAAGAGGGCAGAGAAGTGGAGGGAATGAT |      |   |      |   |      |   |      |   | : | 7030 |
| AOTVOKIR3DL4*01    | :    | -----                                                                                            |      |   |      |   |      |   |      |   | : | -    |
| AOTVOKIR3DL4*02    | :    | -----                                                                                            |      |   |      |   |      |   |      |   | : | -    |
| AOTVOKIR3DL4*02v1  | :    | -----                                                                                            |      |   |      |   |      |   |      |   | : | -    |
| AOTVOKIR3DL4*02v2  | :    | -----                                                                                            |      |   |      |   |      |   |      |   | : | -    |
| AOTVOKIR3DL4*03    | :    | -----                                                                                            |      |   |      |   |      |   |      |   | : | -    |
| AOTVOKIR3DS4*04    | :    | -----                                                                                            |      |   |      |   |      |   |      |   | : | -    |
| AOTVOKIR3DS4*04v1  | :    | -----                                                                                            |      |   |      |   |      |   |      |   | : | -    |
| AOTVOKIR3DS5*01    | :    | -----                                                                                            |      |   |      |   |      |   |      |   | : | -    |
| AOTVOKIR2DS5*01v1  | :    | -----                                                                                            |      |   |      |   |      |   |      |   | : | -    |
| AOTVOKIR2DS5*01v2  | :    | -----                                                                                            |      |   |      |   |      |   |      |   | : | -    |
| AOTVOKIR3DS7*01    | :    | -----                                                                                            |      |   |      |   |      |   |      |   | : | -    |
| AOTVOKIR3DS7*01v1  | :    | -----                                                                                            |      |   |      |   |      |   |      |   | : | -    |
| AOTVOKIR3DL8*01    | :    | -----                                                                                            |      |   |      |   |      |   |      |   | : | -    |
| AOTVOKIR3DL8*01v1  | :    | -----                                                                                            |      |   |      |   |      |   |      |   | : | -    |
| AOTVOKIR3DS8*01v2  | :    | -----                                                                                            |      |   |      |   |      |   |      |   | : | -    |
| AOTVOKIR3DL8*02    | :    | -----                                                                                            |      |   |      |   |      |   |      |   | : | -    |
| AOTVOKIR4DL9*01    | :    | -----                                                                                            |      |   |      |   |      |   |      |   | : | -    |
| AOTVOKIR4DS9*01v1  | :    | -----                                                                                            |      |   |      |   |      |   |      |   | : | -    |
| AOTVOKIR3DL9*01v2  | :    | -----                                                                                            |      |   |      |   |      |   |      |   | : | -    |
| AOTVOKIR4DL9*02    | :    | -----                                                                                            |      |   |      |   |      |   |      |   | : | -    |
| AOTVOKIR4DL10*01   | :    | -----                                                                                            |      |   |      |   |      |   |      |   | : | -    |
| AOTVOKIR3DL10*01v1 | :    | -----                                                                                            |      |   |      |   |      |   |      |   | : | -    |
| AOTVOKIR4DS10*01v2 | :    | -----                                                                                            |      |   |      |   |      |   |      |   | : | -    |
| AOTVOKIR3DS10*01v3 | :    | -----                                                                                            |      |   |      |   |      |   |      |   | : | -    |
| AOTVOKIR3DS10*01v4 | :    | -----                                                                                            |      |   |      |   |      |   |      |   | : | -    |

|                   |      |                                                                                                 |      |   |      |   |      |   |      |   |   |      |
|-------------------|------|-------------------------------------------------------------------------------------------------|------|---|------|---|------|---|------|---|---|------|
|                   | 7040 | *                                                                                               | 7060 | * | 7080 | * | 7100 | * | 7120 | * |   |      |
| BAC_clone_Om      | :    | GGAAGCGAGCAGAGAAATGCCCTAAAATCAGGGCCCTGAGGGAGGGACACAAGGGGAGAGAAAGATGGAGATGTGGGACGGATTGCAGAGAATCC |      |   |      |   |      |   |      |   | : | 7125 |
| AOTVOKIR3DL4*01   | :    | -----                                                                                           |      |   |      |   |      |   |      |   | : | -    |
| AOTVOKIR3DL4*02   | :    | -----                                                                                           |      |   |      |   |      |   |      |   | : | -    |
| AOTVOKIR3DL4*02v1 | :    | -----                                                                                           |      |   |      |   |      |   |      |   | : | -    |
| AOTVOKIR3DL4*02v2 | :    | -----                                                                                           |      |   |      |   |      |   |      |   | : | -    |
| AOTVOKIR3DL4*03   | :    | -----                                                                                           |      |   |      |   |      |   |      |   | : | -    |
| AOTVOKIR3DS4*04   | :    | -----                                                                                           |      |   |      |   |      |   |      |   | : | -    |
| AOTVOKIR3DS4*04v1 | :    | -----                                                                                           |      |   |      |   |      |   |      |   | : | -    |
| AOTVOKIR3DS5*01   | :    | -----                                                                                           |      |   |      |   |      |   |      |   | : | -    |
| AOTVOKIR2DS5*01v1 | :    | -----                                                                                           |      |   |      |   |      |   |      |   | : | -    |
| AOTVOKIR2DS5*01v2 | :    | -----                                                                                           |      |   |      |   |      |   |      |   | : | -    |
| AOTVOKIR3DS7*01   | :    | -----                                                                                           |      |   |      |   |      |   |      |   | : | -    |
| AOTVOKIR3DS7*01v1 | :    | -----                                                                                           |      |   |      |   |      |   |      |   | : | -    |
| AOTVOKIR3DL8*01   | :    | -----                                                                                           |      |   |      |   |      |   |      |   | : | -    |

```

AOTVOKIR3DL8*01v1 : ----- : -
AOTVOKIR3DS8*01v2 : ----- : -
AOTVOKIR3DL8*02   : ----- : -
AOTVOKIR4DL9*01   : ----- : -
AOTVOKIR4DS9*01v1 : ----- : -
AOTVOKIR3DL9*01v2 : ----- : -
AOTVOKIR4DL9*02   : ----- : -
AOTVOKIR4DL10*01  : ----- : -
AOTVOKIR3DL10*01v1 : ----- : -
AOTVOKIR4DS10*01v2 : ----- : -
AOTVOKIR3DS10*01v3 : ----- : -
AOTVOKIR3DS10*01v4 : ----- : -

```

```

                *      7140          *      7160          *      7180          *      7200          *      7220
BAC_clone_Om    : AAAGAGAACTAGAGAGACCGAGAGGCCAGAGAAAAGACAAGGAGGCCGAGACACAGATGATAGATGGATGGATAGAGATAGATAGATGATAAATAGG : 7220
AOTVOKIR3DL4*01 : ----- : -
AOTVOKIR3DL4*02 : ----- : -
AOTVOKIR3DL4*02v1 : ----- : -
AOTVOKIR3DL4*02v2 : ----- : -
AOTVOKIR3DL4*03   : ----- : -
AOTVOKIR3DS4*04   : ----- : -
AOTVOKIR3DS4*04v1 : ----- : -
AOTVOKIR3DS5*01   : ----- : -
AOTVOKIR2DS5*01v1 : ----- : -
AOTVOKIR2DS5*01v2 : ----- : -
AOTVOKIR3DS7*01   : ----- : -
AOTVOKIR3DS7*01v1 : ----- : -
AOTVOKIR3DL8*01   : ----- : -
AOTVOKIR3DL8*01v1 : ----- : -
AOTVOKIR3DS8*01v2 : ----- : -
AOTVOKIR3DL8*02   : ----- : -
AOTVOKIR4DL9*01   : ----- : -
AOTVOKIR4DS9*01v1 : ----- : -
AOTVOKIR3DL9*01v2 : ----- : -
AOTVOKIR4DL9*02   : ----- : -
AOTVOKIR4DL10*01  : ----- : -
AOTVOKIR3DL10*01v1 : ----- : -
AOTVOKIR4DS10*01v2 : ----- : -
AOTVOKIR3DS10*01v3 : ----- : -
AOTVOKIR3DS10*01v4 : ----- : -

```

```

                *      7240          *      7260          *      7280          *      7300          *
BAC_clone_Om    : TAGATGGTAGATCATAGAGAGGTTATAGATACATAGATGATGATTGATTGACAGATGATACATAGAGATGATGATGAAGATAGAGAGAGATAATA : 7315
AOTVOKIR3DL4*01 : ----- : -

```



```

AOTVOKIR3DL4*02      : ----- : -
AOTVOKIR3DL4*02v1    : ----- : -
AOTVOKIR3DL4*02v2    : ----- : -
AOTVOKIR3DL4*03      : ----- : -
AOTVOKIR3DS4*04      : ----- : -
AOTVOKIR3DS4*04v1    : ----- : -
AOTVOKIR3DS5*01      : ----- : -
AOTVOKIR2DS5*01v1    : ----- : -
AOTVOKIR2DS5*01v2    : ----- : -
AOTVOKIR3DS7*01      : ----- : -
AOTVOKIR3DS7*01v1    : ----- : -
AOTVOKIR3DL8*01      : ----- : -
AOTVOKIR3DL8*01v1    : ----- : -
AOTVOKIR3DS8*01v2    : ----- : -
AOTVOKIR3DL8*02      : ----- : -
AOTVOKIR4DL9*01      : ----- : -
AOTVOKIR4DS9*01v1    : ----- : -
AOTVOKIR3DL9*01v2    : ----- : -
AOTVOKIR4DL9*02      : ----- : -
AOTVOKIR4DL10*01     : ----- : -
AOTVOKIR3DL10*01v1   : ----- : -
AOTVOKIR4DS10*01v2   : ----- : -
AOTVOKIR3DS10*01v3   : ----- : -
AOTVOKIR3DS10*01v4   : ----- : -

```

```

          7320      *      7340      *      7360      *      7380      *      7400      *
BAC_clone_Om      : GAGATGATACATAGATATGAATAATAGATGATTGATGCTCAGAAAGACAGACAGTTGATAGAGGCATAGATAGATGATACATAGCTACAGATGAT : 7410
AOTVOKIR3DL4*01   : ----- : -
AOTVOKIR3DL4*02   : ----- : -
AOTVOKIR3DL4*02v1 : ----- : -
AOTVOKIR3DL4*02v2 : ----- : -
AOTVOKIR3DL4*03   : ----- : -
AOTVOKIR3DS4*04   : ----- : -
AOTVOKIR3DS4*04v1 : ----- : -
AOTVOKIR3DS5*01   : ----- : -
AOTVOKIR2DS5*01v1 : ----- : -
AOTVOKIR2DS5*01v2 : ----- : -
AOTVOKIR3DS7*01   : ----- : -
AOTVOKIR3DS7*01v1 : ----- : -
AOTVOKIR3DL8*01   : ----- : -
AOTVOKIR3DL8*01v1 : ----- : -
AOTVOKIR3DS8*01v2 : ----- : -
AOTVOKIR3DL8*02   : ----- : -
AOTVOKIR4DL9*01   : ----- : -
AOTVOKIR4DS9*01v1 : ----- : -

```

AOTVOKIR3DL9\*01v2 : ----- : -  
AOTVOKIR4DL9\*02 : ----- : -  
AOTVOKIR4DL10\*01 : ----- : -  
AOTVOKIR3DL10\*01v1 : ----- : -  
AOTVOKIR4DS10\*01v2 : ----- : -  
AOTVOKIR3DS10\*01v3 : ----- : -  
AOTVOKIR3DS10\*01v4 : ----- : -

7420 \* 7440 \* 7460 \* 7480 \* 7500  
BAC\_clone\_Om : AGATCATTGTAGACACCAAATACAGAAATAGAGACATACATAATGGTTAGAAATAGGCAGAAAGTTATGAACAAGACACAAAGTGAGAGACTCA : 7505  
AOTVOKIR3DL4\*01 : ----- : -  
AOTVOKIR3DL4\*02 : ----- : -  
AOTVOKIR3DL4\*02v1 : ----- : -  
AOTVOKIR3DL4\*02v2 : ----- : -  
AOTVOKIR3DL4\*03 : ----- : -  
AOTVOKIR3DS4\*04 : ----- : -  
AOTVOKIR3DS4\*04v1 : ----- : -  
AOTVOKIR3DS5\*01 : ----- : -  
AOTVOKIR2DS5\*01v1 : ----- : -  
AOTVOKIR2DS5\*01v2 : ----- : -  
AOTVOKIR3DS7\*01 : ----- : -  
AOTVOKIR3DS7\*01v1 : ----- : -  
AOTVOKIR3DL8\*01 : ----- : -  
AOTVOKIR3DL8\*01v1 : ----- : -  
AOTVOKIR3DS8\*01v2 : ----- : -  
AOTVOKIR3DL8\*02 : ----- : -  
AOTVOKIR4DL9\*01 : ----- : -  
AOTVOKIR4DS9\*01v1 : ----- : -  
AOTVOKIR3DL9\*01v2 : ----- : -  
AOTVOKIR4DL9\*02 : ----- : -  
AOTVOKIR4DL10\*01 : ----- : -  
AOTVOKIR3DL10\*01v1 : ----- : -  
AOTVOKIR4DS10\*01v2 : ----- : -  
AOTVOKIR3DS10\*01v3 : ----- : -  
AOTVOKIR3DS10\*01v4 : ----- : -

\* 7520 \* 7540 \* 7560 \* 7580 \* 7600  
BAC\_clone\_Om : GAATTC AAGGAAAAGATCAACCAATCCAAGTCGAGTCAGAGAGAATAAAACAATAGAAAAACCGAAAACCTACCCGGGGTGGGGAAGTGAGGG : 7600  
AOTVOKIR3DL4\*01 : ----- : -  
AOTVOKIR3DL4\*02 : ----- : -  
AOTVOKIR3DL4\*02v1 : ----- : -  
AOTVOKIR3DL4\*02v2 : ----- : -  
AOTVOKIR3DL4\*03 : ----- : -  
AOTVOKIR3DS4\*04 : ----- : -

```

AOTVOKIR3DS4*04v1 : ----- : -
AOTVOKIR3DS5*01   : ----- : -
AOTVOKIR2DS5*01v1 : ----- : -
AOTVOKIR2DS5*01v2 : ----- : -
AOTVOKIR3DS7*01   : ----- : -
AOTVOKIR3DS7*01v1 : ----- : -
AOTVOKIR3DL8*01   : ----- : -
AOTVOKIR3DL8*01v1 : ----- : -
AOTVOKIR3DS8*01v2 : ----- : -
AOTVOKIR3DL8*02   : ----- : -
AOTVOKIR4DL9*01   : ----- : -
AOTVOKIR4DS9*01v1 : ----- : -
AOTVOKIR3DL9*01v2 : ----- : -
AOTVOKIR4DL9*02   : ----- : -
AOTVOKIR4DL10*01  : ----- : -
AOTVOKIR3DL10*01v1 : ----- : -
AOTVOKIR4DS10*01v2 : ----- : -
AOTVOKIR3DS10*01v3 : ----- : -
AOTVOKIR3DS10*01v4 : ----- : -

```

```

                *      7620          *      7640          *      7660          *      7680          *
BAC_clone_Om    : GAGAGACAGGGAAGGTAGAAAGGAGAAAACAGACAGAAGAGAGACGGGGTGGAGGGTGAGAGAGAGCATCAGCTCATGGAGCAGGGGAGTGAGTTC : 7695
AOTVOKIR3DL4*01 : ----- : -
AOTVOKIR3DL4*02 : ----- : -
AOTVOKIR3DL4*02v1 : ----- : -
AOTVOKIR3DL4*02v2 : ----- : -
AOTVOKIR3DL4*03 : ----- : -
AOTVOKIR3DS4*04 : ----- : -
AOTVOKIR3DS4*04v1 : ----- : -
AOTVOKIR3DS5*01 : ----- : -
AOTVOKIR2DS5*01v1 : ----- : -
AOTVOKIR2DS5*01v2 : ----- : -
AOTVOKIR3DS7*01 : ----- : -
AOTVOKIR3DS7*01v1 : ----- : -
AOTVOKIR3DL8*01 : ----- : -
AOTVOKIR3DL8*01v1 : ----- : -
AOTVOKIR3DS8*01v2 : ----- : -
AOTVOKIR3DL8*02 : ----- : -
AOTVOKIR4DL9*01 : ----- : -
AOTVOKIR4DS9*01v1 : ----- : -
AOTVOKIR3DL9*01v2 : ----- : -
AOTVOKIR4DL9*02 : ----- : -
AOTVOKIR4DL10*01 : ----- : -
AOTVOKIR3DL10*01v1 : ----- : -
AOTVOKIR4DS10*01v2 : ----- : -

```

AOTVOKIR3DS10\*01v3 : ----- : -  
AOTVOKIR3DS10\*01v4 : ----- : -

EXON 5

7700 \* 7720 \* 7740 \* 7760 \* 7780 \*

BAC\_clone\_Om : TCAGCTCAGGTGTGAAGGGAGCTGTGACAAGGAAGAGCCTCCTGAGCAAAGCTGCCTCTTCTCCTTCCAGGTCCTATATGATAAAACCTTCTCTCTCA : 7790  
AOTVOKIR3DL4\*01 : ----- : 678  
AOTVOKIR3DL4\*02 : ----- : 678  
AOTVOKIR3DL4\*02v1 : ----- : 642  
AOTVOKIR3DL4\*02v2 : ----- : 678  
AOTVOKIR3DL4\*03 : ----- : 678  
AOTVOKIR3DS4\*04 : ----- : 678  
AOTVOKIR3DS4\*04v1 : ----- : 678  
AOTVOKIR3DS5\*01 : ----- : 678  
AOTVOKIR2DS5\*01v1 : ----- : 480  
AOTVOKIR2DS5\*01v2 : ----- : 393  
AOTVOKIR3DS7\*01 : ----- : 678  
AOTVOKIR3DS7\*01v1 : ----- : 678  
AOTVOKIR3DL8\*01 : ----- : 678  
AOTVOKIR3DL8\*01v1 : ----- : 678  
AOTVOKIR3DS8\*01v2 : ----- : 678  
AOTVOKIR3DL8\*02 : ----- : 678  
AOTVOKIR4DL9\*01 : ----- : 963  
AOTVOKIR4DS9\*01v1 : ----- : 963  
AOTVOKIR3DL9\*01v2 : ----- : 765  
AOTVOKIR4DL9\*02 : ----- : 963  
AOTVOKIR4DL10\*01 : ----- : 963  
AOTVOKIR3DL10\*01v1 : ----- : 762  
AOTVOKIR4DS10\*01v2 : ----- : 963  
AOTVOKIR3DS10\*01v3 : ----- : 678  
AOTVOKIR3DS10\*01v4 : ----- : 678

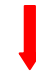

GTC ATATGAgAAaCCTTCTCTCTCA

7800 \* 7820 \* 7840 \* 7860 \* 7880

BAC\_clone\_Om : GCCCGGCCGGGCCCCACGGTTTCAGGCAGGAGAGAACGTGACCTTGTCCTGCAGCTCCCGGACCTGGTTTCGACATGTACCATCTATCCAGGGAGGG : 7885  
AOTVOKIR3DL4\*01 : GCCCAGCCGGGCCCCACGGTTTCAGGCAGGAGAGAATGTGACCTTGTCCTGCAGCTCCCGGACCTGGTTTCGACATGTACCATCTAACCAGGGAGGG : 773  
AOTVOKIR3DL4\*02 : GCCCAGCCGGGCCCCACGGTTTCAGGCAGGAGAGAATGTGACCTTGTCCTGCAGCTCCCGGACCTGGTTTCGACATGTACCATCTAACCAGGGAGGG : 773  
AOTVOKIR3DL4\*02v1 : GCCCAGCCGGGCCCCACGGTTTCAGGCAGGAGAGAATGTGACCTTGTCCTGCAGCTCCCGGACCTGGTTTCGACATGTACCATCTAACCAGGGAGGG : 737  
AOTVOKIR3DL4\*02v2 : GCCCAGCCGGGCCCCACGGTTTCAGGCAGGAGAGAATGTGACCTTGTCCTGCAGCTCCCGGACCTGGTTTCGACATGTACCATCTAACCAGGGAGGG : 773  
AOTVOKIR3DL4\*03 : GCCCAGCCGGGCCCCACGGTTTCAGGCAGGAGAGAATGTGACCTTGTCCTGCAGCTCCCGGACCTGGTTTCGACATGTACCATCTAACCAGGGAGGG : 773  
AOTVOKIR3DS4\*04 : GCCCAGCCGGGCCCCACGGTTTCAGGCAGGAGAGAATGTGACCTTGTCCTGCAGCTCCCGGACCTGGTTTCGACATGTACCATCTAACCAGGGAGGG : 773  
AOTVOKIR3DS4\*04v1 : GCCCAGCCGGGCCCCACGGTTTCAGGCAGGAGAGAATGTGACCTTGTCCTGCAGCTCCCGGACCTGGTTTCGACATGTACCATCTAACCAGGGAGGG : 773  
AOTVOKIR3DS5\*01 : GCCCAGCCGGGCCCCACGCTTCAGCCAGGAGAGAATGTGACCTTGTCCTGCAGCTCCCGGACCTGGTTTCGACATGTACCATCTATCCAGGGAAGG : 773  
AOTVOKIR2DS5\*01v1 : GCCCAGCCGGGCCCCACGCTTCAGCCAGGAGAGAATGTGACCTTGTCCTGCAGCTCCCGGACCTGGTTTCGACATGTACCATCTATCCAGGGAAGG : 575  
AOTVOKIR2DS5\*01v2 : GCCCAGCCGGGCCCCACGCTTCAGCCAGGAGAGAATGTGACCTTGTCCTGCAGCTCCCGGACCTGGTTTCGACATGTACCATCTATCCAGGGAAGG : 488  
AOTVOKIR3DS7\*01 : GCCCAGCCAGGCCCCACGGTTTCAGGCAGGAGAGAATGTGACCTTGTCCTGCAGCTCCCGGAGCTGGTTTCGACATGTACCATCTAACCAGGGAGGG : 773

AOTVOKIR3DS7\*01v1 : GCCCAGCCAGGCCCCACGGTTCAGGCAGGAGAGAATGTGACCTTGTCCTGCAGCTCCCGGAGCTGGTTCGACATGTACCATCTAACTAGGGAGGG : 773  
 AOTVOKIR3DL8\*01 : GCCCAGCCAGGCCCCACGGTTCAGGCAGGAGAGAATGTGACCTTGTCCTGCAGCTCCCGGAGCTGGTTCGACATGTACCATCTATCCAGGGAGGG : 773  
 AOTVOKIR3DL8\*01v1 : GCCCAGCCAGGCCCCACGGTTCAGGCAGGAGAGAATGTGACCTTGTCCTGCAGCTCCCGGAGCTGGTTCGACATGTACCATCTATCCAGGGAGGG : 773  
 AOTVOKIR3DS8\*01v2 : GCCCAGCCAGGCCCCACGGTTCAGGCAGGAGAGAATGTGACCTTGTCCTGCAGCTCCCGGAGCTGGTTCGACATGTACCATCTATCCAGGGAGGG : 773  
 AOTVOKIR3DL8\*02 : GCCCAGCCAGGCCCCACGGTTCAGGCAGGAGAGAATGTGACCTTGTCCTGCAGCTCCCGGAGCTGGTTCGACATGTACCATCTATCCAGGGAGGG : 773  
 AOTVOKIR4DL9\*01 : GCCCAGCCAGGCCCCACGGTTCAGGCAGGAGAGAATGTGACCTTGTCCTGCAGCTCCCGGAGCTGGTTCGACATGTACCATCTATCCAGGGAGGG : 1058  
 AOTVOKIR4DS9\*01v1 : GCCCAGCCAGGCCCCACGGTTCAGGCAGGAGAGAATGTGACCTTGTCCTGCAGCTCCCGGAGCTGGTTCGACATGTACCATCTATCCAGGGAGGG : 1058  
 AOTVOKIR3DL9\*01v2 : GCCCAGCCAGGCCCCACGGTTCAGGCAGGAGAGAATGTGACCTTGTCCTGCAGCTCCCGGAGCTGGTTCGACATGTACCATCTATCCAGGGAGGG : 860  
 AOTVOKIR4DL9\*02 : GCCCAGCCAGGCCCCACGGTTCAGGCAGGAGAGAATGTGACCTTGTCCTGCAGCTCCCGGAGCTGGTTCGACATGTACCATCTATCCAGGGAGGG : 1058  
 AOTVOKIR4DL10\*01 : GCCCAGCCAGGCCCCACGGTTCAGGCAGGAGAGAATGTGACCTTGTCCTGCAGCTCCCGGAGCTGGTTCGACATGTACCATCTATCCAGGGAGGG : 1058  
 AOTVOKIR3DL10\*01v1 : GCCCAGCCAGGCCCCACGGTTCAGGCAGGAGAGAATGTGACCTTGTCCTGCAGCTCCCGGAGCTGGTTCGACATGTACCATCTATCCAGGGAGGG : 857  
 AOTVOKIR4DS10\*01v2 : GCCCAGCCAGGCCCCACGGTTCAGGCAGGAGAGAATGTGACCTTGTCCTGCAGCTCCCGGAGCTGGTTCGACATGTACCATCTATCCAGGGAGGG : 1058  
 AOTVOKIR3DS10\*01v3 : GCCCAGCCAGGCCCCACGGTTCAGGCAGGAGAGAATGTGACCTTGTCCTGCAGCTCCCGGAGCTGGTTCGACATGTACCATCTATCCAGGGAGGG : 773  
 AOTVOKIR3DS10\*01v4 : GCCCAGCCAGGCCCCACGGTTCAGGCAGGAGAGAATGTGACCTTGTCCTGCAGCTCCCGGAGCTGGTTCGACATGTACCATCTATCCAGGGAGGG : 773  
 GCCCaGcCgGGCCCCACG TTCAG CAGGAGAGAATGTGACCTTGTCcTGCAGCTCCCGGA CT Gtt A TGTACCATCTA CcAGgGA GG

\* 7900 \* 7920 \* 7940 \* 7960 \* 7980  
 BAC\_clone\_Om : GGAGGCCCCTGAATTCAGGCTCCCTGCAGTGCCAGCATCAATGGAACATTCCAGGCCCACTTCCCTCTGGGCCCTGCCACCCACGGAGGGACCT : 7980  
 AOTVOKIR3DL4\*01 : GGAGGCCCCTGAATTCAGGCTCCCTGCAGTGCCAGGCATCAATGGAACGTTCCAGGCCCACTTCCCTCTGGGCCCTGCCACCCATGGAGGGACCT : 868  
 AOTVOKIR3DL4\*02 : GGAGGCCCCTGAATTCAGGCTCCCTGCAGTGCCGGGCATCAATGGAACGTTCCAGGCCCACTTCCCTCTGGGCCCTGCCACCCATGGAGGGACCT : 868  
 AOTVOKIR3DL4\*02v1 : GGAGGCCCCTGAATTCAGGCTCCCTGCAGTGCCGGGCATCAATGGAACGTTCCAGGCCCACTTCCCTCTGGGCCCTGCCACCCATGGAGGGACCT : 832  
 AOTVOKIR3DL4\*02v2 : GGAGGCCCCTGAATTCAGGCTCCCTGCAGTGCCGGGCATCAATGGAACGTTCCAGGCCCACTTCCCTCTGGGCCCTGCCACCCATGGAGGGACCT : 868  
 AOTVOKIR3DL4\*03 : GGAGGCCCCTGAATTCAGGCTCCCTGCAGTGCCAGGCATCAATGGAACGTTCCAGGCCCACTTCCCTCTGGGCCCTGCCACCCATGGAGGGACCT : 868  
 AOTVOKIR3DS4\*04 : AGAGGCCCCTGAATTCAGGCTCCCTGCAGTGCCGGGCATCAATGGAACGTTCCAGGCCCACTTCCCTCTGGGCCCTGCCACCCATGGAGGGACCT : 868  
 AOTVOKIR3DS4\*04v1 : AGAGGCCCCTGAATTCAGGCTCCCTGCAGTGCCGGGCATCAATGGAACGTTCCAGGCCCACTTCCCTCTGGGCCCTGCCACCCATGGAGGGACCT : 868  
 AOTVOKIR3DS5\*01 : GGAGGCCCCTGAATTCAGGCTCCCTGCAGTGCCAGCATCAATGGAACATTCCAGGCCCACTTCCCTCTGGGCCCTGCCACCCACGGAGGGACCT : 868  
 AOTVOKIR2DS5\*01v1 : GGAGGCCCCTGAATTCAGGCTCCCTGCAGTGCCAGCATCAATGGAACATTCCAGGCCCACTTCCCTCTGGGCCCTGCCACCCACGGAGGGACCT : 670  
 AOTVOKIR2DS5\*01v2 : GGAGGCCCCTGAATTCAGGCTCCCTGCAGTGCCAGCATCAATGGAACATTCCAGGCCCACTTCCCTCTGGGCCCTGCCACCCACGGAGGGACCT : 583  
 AOTVOKIR3DS7\*01 : GGAGGCCCCTGAATTCAGGCTCCCTGCAGTGCCCATCATCAGTGAACATTCCAGGCCCACTTCCCTCTGGGCCCTGCCACCCACGGAGGGACCT : 868  
 AOTVOKIR3DS7\*01v1 : GGAGGCCCCTGAATTCAGGCTCCCTGCAGTGCCCATCATCAGTGAACATTCCAGGCCCACTTCCCTCTGGGCCCTGCCACCCACGGAGGGACCT : 868  
 AOTVOKIR3DL8\*01 : GAAGGCCCCTGAATTCAGGCTCCCTGCAGTGCCCGGCATCAATGGAACATTCCAGGCCCACTTCCCTCTGGGCCCTGCCACCCACGGAGGGACCT : 868  
 AOTVOKIR3DL8\*01v1 : GAAGGCCCCTGAATTCAGGCTCCCTGCAGTGCCCGGCATCAATGGAACATTCCAGGCCCACTTCCCTCTGGGCCCTGCCACCCACGGAGGGACCT : 868  
 AOTVOKIR3DS8\*01v2 : GAAGGCCCCTGAATTCAGGCTCCCTGCAGTGCCCGGCATCAATGGAACATTCCAGGCCCACTTCCCTCTGGGCCCTGCCACCCACGGAGGGACCT : 868  
 AOTVOKIR3DL8\*02 : GAAGGCCCCTGAATTCAGGCTCCCTGCAGTGCCCGGCATCAATGGAACATTCCAGGCCCACTTCCCTCTGGGCCCTGCCACCCACGGAGGGACCT : 868  
 AOTVOKIR4DL9\*01 : GGAGGCCCCTGAATTCAGGCTCCCTGCAGTGCCAGCATCAATGGAACATTCCAGGCCCACTTCCCTCTGGGCCCTGCCACCCACGGAGGGACCT : 1153  
 AOTVOKIR4DS9\*01v1 : GGAGGCCCCTGAATTCAGGCTCCCTGCAGTGCCAGCATCAATGGAACATTCCAGGCCCACTTCCCTCTGGGCCCTGCCACCCACGGAGGGACCT : 1153  
 AOTVOKIR3DL9\*01v2 : GGAGGCCCCTGAATTCAGGCTCCCTGCAGTGCCAGCATCAATGGAACATTCCAGGCCCACTTCCCTCTGGGCCCTGCCACCCACGGAGGGACCT : 955  
 AOTVOKIR4DL9\*02 : GGAGGACCCGTCGAATTCAGGACTCCCTGCAGTGCCAGCATCAATGGAACATTCCAGGCCCACTTCCCTCTGGGCCCTGCCACCCACGGAGGGACCT : 1153  
 AOTVOKIR4DL10\*01 : GGAGGCCCCTGAATTCAGGCTCCCTGCAGTGCCAGCATCAATGGAACATTCCAGGCCCACTTCCCTCTGGGCCCTGCCACCCACGGAGGGACCT : 1153  
 AOTVOKIR3DL10\*01v1 : GGAGGCCCCTGAATTCAGGCTCCCTGCAGTGCCAGCATCAATGGAACATTCCAGGCCCACTTCCCTCTGGGCCCTGCCACCCACGGAGGGACCT : 952  
 AOTVOKIR4DS10\*01v2 : GGAGGCCCCTGAATTCAGGCTCCCTGCAGTGCCAGCATCAATGGAACATTCCAGGCCCACTTCCCTCTGGGCCCTGCCACCCACGGAGGGACCT : 1153  
 AOTVOKIR3DS10\*01v3 : GGAGGCCCCTGAATTCAGGCTCCCTGCAGTGCCAGCATCAATGGAACATTCCAGGCCCACTTCCCTCTGGGCCCTGCCACCCACGGAGGGACCT : 868  
 AOTVOKIR3DS10\*01v4 : GGAGGCCCCTGAATTCAGGCTCCCTGCAGTGCCAGCATCAATGGAACATTCCAGGCCCACTTCCCTCTGGGCCCTGCCACCCACGGAGGGACCT : 868  
 ggAGgCCCcTgAA TCAGgCTCCCTGCAGTGCC gCATCAaTGAAC TTCCAGgCCCCTTCCCTCTGGGCCCTGCCACCCA GGAGGGACCT

\* 8000 \* 8020 \* 8040 \* 8060 \*

↓

```

BAC_clone_Om      : ACAGATGCTTCGGCTCTTTCCGTGACTCTCCCTATGAGTGGTCAGCCCCGAGTGACCCACTGTCCGTTTCTGTGCACAGGTGAGGAAACCCCATAC : 8075
AOTVOKIR3DL4*01  : ACAGATGCTTCGGCTCTTTCCGTGACTCTCCCTATGAGTGGTCAGCCCCGAGTGACCCACTGTCCATTTCTGTGCACAG----- : 946
AOTVOKIR3DL4*02  : ACAGATGCTTCGGCTCTTTCCGTGACTCTCCCTATGAGTGGTCAGCCCCGAGTGACCCACTGTCCATTTCTGTGCACAG----- : 946
AOTVOKIR3DL4*02v1 : ACAGATGCTTCGGCTCTTTCCGTGACTCTCCCTATGAGTGGTCAGCCCCGAGTGACCCACTGTCCATTTCTGTGCACAG----- : 910
AOTVOKIR3DL4*02v2 : ACAGATGCTTCGGCTCTTTCCGTGACTCTCCCTATGAGTGGTCAGCCCCGAGTGACCCACTGTCCATTTCTGTGCACAG----- : 946
AOTVOKIR3DL4*03  : ACAGATGCTTCGGCTCTTTCCGTGACTCTCCCTATGAGTGGTCAGCCCCGAGTGACCCACTGTCCATTTCTGTGCACAG----- : 946
AOTVOKIR3DS4*04  : ACAAAATGCTTCGGCTCTTTCCGTGACTCTCCCTATGAGTGGTCAGCCCCGAGTGACCCACTGTCCGTTTCTGTGCACAG----- : 946
AOTVOKIR3DS4*04v1 : ACAAAATGCTTCGGCTCTTTCCGTGACTCTCCCTATGAGTGGTCAGCCCCGAGTGACCCACTGTCCGTTTCTGTGCACAG----- : 946
AOTVOKIR3DS5*01  : ACAGATGCTTCGGCTCTTTCCGTGACTCTCCCTACCGCTGGTCAACCCCCGAGTGACCCACTGTCCGTTTCTGTGCACAG----- : 946
AOTVOKIR2DS5*01v1 : ACAGATGCTTCGGCTCTTTCCGTGACTCTCCCTACCGCTGGTCAACCCCCGAGTGACCCACTGTCCGTTTCTGTGCACAG----- : 748
AOTVOKIR2DS5*01v2 : ACAGATGCTTCGGCTCTTTCCGTGACTCTCCCTACCGCTGGTCAACCCCCGAGTGACCCACTGTCCGTTTCTGTGCACAG----- : 661
AOTVOKIR3DS7*01  : ACAGATGCTTCGGCTCTTTCCGTGACTCTCCCTACCGCTGGTCAACCCCCGAGTGACCCACTGTCCGTTTCTGTGCACAG----- : 946
AOTVOKIR3DS7*01v1 : ACAGATGCTTCGGCTCTTTCCGTGACTCTCCCTACCGCTGGTCAACCCCCGAGTGACCCACTGTCCGTTTCTGTGCACAG----- : 946
AOTVOKIR3DL8*01  : ACAGATGCTTCGGCTCTTTCCGTGACTCTCCCTACGAGTGGTCAGCCCCGAGTGACCCACTGTCCGTTTCTGTGCACAG----- : 946
AOTVOKIR3DL8*01v1 : ACAGATGCTTCGGCTCTTTCCGTGACTCTCCCTACGAGTGGTCAGCCCCGAGTGACCCACTGTCCGTTTCTGTGCACAG----- : 946
AOTVOKIR3DS8*01v2 : ACAGATGCTTCGGCTCTTTCCGTGACTCTCCCTACGAGTGGTCAGCCCCGAGTGACCCACTGTCCGTTTCTGTGCACAG----- : 946
AOTVOKIR3DL8*02  : ACAGATGCTTCGGCTCTTTCCGTGACTCTCCCTACGAGTGGTCAGCCCCGAGTGACCCACTGTCCGTTTCTGTGCACAG----- : 946
AOTVOKIR4DL9*01  : ACAGATGCTTCGGCTCTTTCCATGGCTCTCTCTATGAGTGGTCAGTCCCAGTGACCCACTGTCTGTTTCTGTGCACAG----- : 1231
AOTVOKIR4DS9*01v1 : ACAGATGCTTCGGCTCTTTCCATGGCTCTCTCTATGAGTGGTCAGTCCCAGTGACCCACTGTCTGTTTCTGTGCACAGGTGAGGAAACCCCATAC : 1248
AOTVOKIR3DL9*01v2 : ACAGATGCTTCGGCTCTTTCCATGGCTCTCTCTATGAGTGGTCAGTCCCAGTGACCCACTGTCTGTTTCTGTGCACAG----- : 1033
AOTVOKIR4DL9*02  : ACAGATGCTTCGGCTCTTTCCATGGCTCTCTGTATGAGTGGTCAGTCCCAGTGACCCACTGTCTGTGTGTGTGCACAG----- : 1231
AOTVOKIR4DL10*01 : ACAGATGCTTCGGCTCTTTCCATGGCTCTCTCTATGAGTGGTCAGCCCCGAGTGACCCACTGTCTGTTTCTGTGCACAG----- : 1231
AOTVOKIR3DL10*01v1 : ACAGATGCTTCGGCTCTTTCCATGGCTCTCTCTATGAGTGGTCAGCCCCGAGTGACCCACTGTCTGTTTCTGTGCACAG----- : 1030
AOTVOKIR4DS10*01v2 : ACAGATGCTTCGGCTCTTTCCATGGCTCTCTCTATGAGTGGTCAGCCCCGAGTGACCCACTGTCTGTTTCTGTGCACAG----- : 1231
AOTVOKIR3DS10*01v3 : ACAGATGCTTCGGCTCTTTCCATGGCTCTCTCTATGAGTGGTCAGCCCCGAGTGACCCACTGTCTGTTTCTGTGCACAG----- : 946
AOTVOKIR3DS10*01v4 : ACAGATGCTTCGGCTCTTTCCATGGCTCTCTCTATGAGTGGTCAGCCCCGAGTGACCCACTGTCTGTTTCTGTGCACAGGTGAGGAAACCCCATAC : 963
ACAgATGCTTCGGCTCTTTCC TG CTCTC cTA gagTGGTCAgcCCCCGAGTGACCCACTGTc gTtTcTGTGCACAG

```

```

      8080          *          8100          *          8120          *          8140          *          8160          *
BAC_clone_Om      : CTGTCCCATGTCTGATGATCCCAGAGCCATAGCTGAGGAACTTCTGCTGATGATGGAGGGAAGCGTGGACAGATGCAGAGAGAAGACGAAGCCT : 8170
AOTVOKIR3DL4*01  : ----- : -
AOTVOKIR3DL4*02  : ----- : -
AOTVOKIR3DL4*02v1 : ----- : -
AOTVOKIR3DL4*02v2 : ----- : -
AOTVOKIR3DL4*03  : ----- : -
AOTVOKIR3DS4*04  : ----- : -
AOTVOKIR3DS4*04v1 : ----- : -
AOTVOKIR3DS5*01  : ----- : -
AOTVOKIR2DS5*01v1 : ----- : -
AOTVOKIR2DS5*01v2 : ----- : -
AOTVOKIR3DS7*01  : ----- : -
AOTVOKIR3DS7*01v1 : ----- : -
AOTVOKIR3DL8*01  : ----- : -
AOTVOKIR3DL8*01v1 : ----- : -
AOTVOKIR3DS8*01v2 : ----- : -
AOTVOKIR3DL8*02  : ----- : -

```

```

AOTVOKIR4DL9*01      : ----- : -
AOTVOKIR4DS9*01v1   : CTGTCCCATGTCTGA----- : 1260
AOTVOKIR3DL9*01v2   : ----- : -
AOTVOKIR4DL9*02     : ----- : -
AOTVOKIR4DL10*01    : ----- : -
AOTVOKIR3DL10*01v1  : ----- : -
AOTVOKIR4DS10*01v2  : ----- : -
AOTVOKIR3DS10*01v3  : ----- : -
AOTVOKIR3DS10*01v4  : CTGTCCCATGTCTGA----- : 975

```

```

                8180      *      8200      *      8220      *      8240      *      8260
BAC_clone_Om      : GGGTGTGAGGACAGGGTCAGGGCGCAGGATGCCAGACAGGGCACCTCCAAGCCCTCCTCCACGACCTGCATGGAGGCCCGCGTTTCAGGGCTCTGG : 8265
AOTVOKIR3DL4*01   : ----- : -
AOTVOKIR3DL4*02   : ----- : -
AOTVOKIR3DL4*02v1 : ----- : -
AOTVOKIR3DL4*02v2 : ----- : -
AOTVOKIR3DL4*03   : ----- : -
AOTVOKIR3DS4*04   : ----- : -
AOTVOKIR3DS4*04v1 : ----- : -
AOTVOKIR3DS5*01   : ----- : -
AOTVOKIR2DS5*01v1 : ----- : -
AOTVOKIR2DS5*01v2 : ----- : -
AOTVOKIR3DS7*01   : ----- : -
AOTVOKIR3DS7*01v1 : ----- : -
AOTVOKIR3DL8*01   : ----- : -
AOTVOKIR3DL8*01v1 : ----- : -
AOTVOKIR3DS8*01v2 : ----- : -
AOTVOKIR3DL8*02   : ----- : -
AOTVOKIR4DL9*01   : ----- : -
AOTVOKIR4DS9*01v1 : ----- : -
AOTVOKIR3DL9*01v2 : ----- : -
AOTVOKIR4DL9*02   : ----- : -
AOTVOKIR4DL10*01  : ----- : -
AOTVOKIR3DL10*01v1 : ----- : -
AOTVOKIR4DS10*01v2 : ----- : -
AOTVOKIR3DS10*01v3 : ----- : -
AOTVOKIR3DS10*01v4 : ----- : -

```

```

                *      8280      *      8300      *      8320      *      8340      *      8360
BAC_clone_Om      : GCACCCAGGCAGATGGAGAAAGCGGTCAGCATAGGCCAGAGGAGGAGAGACGGGGATCAGTTTGGGGAGATCAGAGGTTCCCTCAGCCCCTCAA : 8360
AOTVOKIR3DL4*01   : ----- : -
AOTVOKIR3DL4*02   : ----- : -
AOTVOKIR3DL4*02v1 : ----- : -
AOTVOKIR3DL4*02v2 : ----- : -

```

```

AOTVOKIR3DL4*03 : ----- : -
AOTVOKIR3DS4*04 : ----- : -
AOTVOKIR3DS4*04v1 : ----- : -
AOTVOKIR3DS5*01 : ----- : -
AOTVOKIR2DS5*01v1 : ----- : -
AOTVOKIR2DS5*01v2 : ----- : -
AOTVOKIR3DS7*01 : ----- : -
AOTVOKIR3DS7*01v1 : ----- : -
AOTVOKIR3DL8*01 : ----- : -
AOTVOKIR3DL8*01v1 : ----- : -
AOTVOKIR3DS8*01v2 : ----- : -
AOTVOKIR3DL8*02 : ----- : -
AOTVOKIR4DL9*01 : ----- : -
AOTVOKIR4DS9*01v1 : ----- : -
AOTVOKIR3DL9*01v2 : ----- : -
AOTVOKIR4DL9*02 : ----- : -
AOTVOKIR4DL10*01 : ----- : -
AOTVOKIR3DL10*01v1 : ----- : -
AOTVOKIR4DS10*01v2 : ----- : -
AOTVOKIR3DS10*01v3 : ----- : -
AOTVOKIR3DS10*01v4 : ----- : -

```

```

*      8380      *      8400      *      8420      *      8440      *
BAC_clone_Om : CCTCACCCATTTCCCAGAAGCCCATCCTGGCCTCTCACCCACAGAGACACGTCATCACCAGCAACCCCATGCCCTTTTCTTTTCATTTGGAAAA : 8455
AOTVOKIR3DL4*01 : ----- : -
AOTVOKIR3DL4*02 : ----- : -
AOTVOKIR3DL4*02v1 : ----- : -
AOTVOKIR3DL4*02v2 : ----- : -
AOTVOKIR3DL4*03 : ----- : -
AOTVOKIR3DS4*04 : ----- : -
AOTVOKIR3DS4*04v1 : ----- : -
AOTVOKIR3DS5*01 : ----- : -
AOTVOKIR2DS5*01v1 : ----- : -
AOTVOKIR2DS5*01v2 : ----- : -
AOTVOKIR3DS7*01 : ----- : -
AOTVOKIR3DS7*01v1 : ----- : -
AOTVOKIR3DL8*01 : ----- : -
AOTVOKIR3DL8*01v1 : ----- : -
AOTVOKIR3DS8*01v2 : ----- : -
AOTVOKIR3DL8*02 : ----- : -
AOTVOKIR4DL9*01 : ----- : -
AOTVOKIR4DS9*01v1 : ----- : -
AOTVOKIR3DL9*01v2 : ----- : -
AOTVOKIR4DL9*02 : ----- : -
AOTVOKIR4DL10*01 : ----- : -

```



AOTVOKIR3DL10\*01v1 : ----- : -  
AOTVOKIR4DS10\*01v2 : ----- : -  
AOTVOKIR3DS10\*01v3 : ----- : -  
AOTVOKIR3DS10\*01v4 : ----- : -

8460 \* 8480 \* 8500 \* 8520 \* 8540 \*  
BAC\_clone\_Om : ACATTTATTGAGGTTAAATATACCCATATAATTTACCACCTTTACCTTTTTATGAGACAGAGTCTTGCTCCATTGCCCAGGCTGGAGCGCAATTG : 8550  
AOTVOKIR3DL4\*01 : ----- : -  
AOTVOKIR3DL4\*02 : ----- : -  
AOTVOKIR3DL4\*02v1 : ----- : -  
AOTVOKIR3DL4\*02v2 : ----- : -  
AOTVOKIR3DL4\*03 : ----- : -  
AOTVOKIR3DS4\*04 : ----- : -  
AOTVOKIR3DS4\*04v1 : ----- : -  
AOTVOKIR3DS5\*01 : ----- : -  
AOTVOKIR2DS5\*01v1 : ----- : -  
AOTVOKIR2DS5\*01v2 : ----- : -  
AOTVOKIR3DS7\*01 : ----- : -  
AOTVOKIR3DS7\*01v1 : ----- : -  
AOTVOKIR3DL8\*01 : ----- : -  
AOTVOKIR3DL8\*01v1 : ----- : -  
AOTVOKIR3DS8\*01v2 : ----- : -  
AOTVOKIR3DL8\*02 : ----- : -  
AOTVOKIR4DL9\*01 : ----- : -  
AOTVOKIR4DS9\*01v1 : ----- : -  
AOTVOKIR3DL9\*01v2 : ----- : -  
AOTVOKIR4DL9\*02 : ----- : -  
AOTVOKIR4DL10\*01 : ----- : -  
AOTVOKIR3DL10\*01v1 : ----- : -  
AOTVOKIR4DS10\*01v2 : ----- : -  
AOTVOKIR3DS10\*01v3 : ----- : -  
AOTVOKIR3DS10\*01v4 : ----- : -

8560 \* 8580 \* 8600 \* 8620 \* 8640 \*  
BAC\_clone\_Om : CACGATCTCAGCTCACTGCAACCTCTGCCTCCTGGGTTCAAGCAATTGTCCTTCCTCAGCCTCCCAAATAGTTGGGATTACAGGCGCGGCCACC : 8645  
AOTVOKIR3DL4\*01 : ----- : -  
AOTVOKIR3DL4\*02 : ----- : -  
AOTVOKIR3DL4\*02v1 : ----- : -  
AOTVOKIR3DL4\*02v2 : ----- : -  
AOTVOKIR3DL4\*03 : ----- : -  
AOTVOKIR3DS4\*04 : ----- : -  
AOTVOKIR3DS4\*04v1 : ----- : -  
AOTVOKIR3DS5\*01 : ----- : -  
AOTVOKIR2DS5\*01v1 : ----- : -

AOTVOKIR2DS5\*01v2 : ----- : -  
 AOTVOKIR3DS7\*01 : ----- : -  
 AOTVOKIR3DS7\*01v1 : ----- : -  
 AOTVOKIR3DL8\*01 : ----- : -  
 AOTVOKIR3DL8\*01v1 : ----- : -  
 AOTVOKIR3DS8\*01v2 : ----- : -  
 AOTVOKIR3DL8\*02 : ----- : -  
 AOTVOKIR4DL9\*01 : ----- : -  
 AOTVOKIR4DS9\*01v1 : ----- : -  
 AOTVOKIR3DL9\*01v2 : ----- : -  
 AOTVOKIR4DL9\*02 : ----- : -  
 AOTVOKIR4DL10\*01 : ----- : -  
 AOTVOKIR3DL10\*01v1 : ----- : -  
 AOTVOKIR4DS10\*01v2 : ----- : -  
 AOTVOKIR3DS10\*01v3 : ----- : -  
 AOTVOKIR3DS10\*01v4 : ----- : -

BAC\_clone\_Om : \* 8660 \* 8680 \* 8700 \* 8720 \* 8740 : 8740  
 AOTVOKIR3DL4\*01 : ----- : -  
 AOTVOKIR3DL4\*02 : ----- : -  
 AOTVOKIR3DL4\*02v1 : ----- : -  
 AOTVOKIR3DL4\*02v2 : ----- : -  
 AOTVOKIR3DL4\*03 : ----- : -  
 AOTVOKIR3DS4\*04 : ----- : -  
 AOTVOKIR3DS4\*04v1 : ----- : -  
 AOTVOKIR3DS5\*01 : ----- : -  
 AOTVOKIR2DS5\*01v1 : ----- : -  
 AOTVOKIR2DS5\*01v2 : ----- : -  
 AOTVOKIR3DS7\*01 : ----- : -  
 AOTVOKIR3DS7\*01v1 : ----- : -  
 AOTVOKIR3DL8\*01 : ----- : -  
 AOTVOKIR3DL8\*01v1 : ----- : -  
 AOTVOKIR3DS8\*01v2 : ----- : -  
 AOTVOKIR3DL8\*02 : ----- : -  
 AOTVOKIR4DL9\*01 : ----- : -  
 AOTVOKIR4DS9\*01v1 : ----- : -  
 AOTVOKIR3DL9\*01v2 : ----- : -  
 AOTVOKIR4DL9\*02 : ----- : -  
 AOTVOKIR4DL10\*01 : ----- : -  
 AOTVOKIR3DL10\*01v1 : ----- : -  
 AOTVOKIR4DS10\*01v2 : ----- : -  
 AOTVOKIR3DS10\*01v3 : ----- : -  
 AOTVOKIR3DS10\*01v4 : ----- : -

|                    |   |                                                                                                |   |      |   |      |   |      |   |   |      |
|--------------------|---|------------------------------------------------------------------------------------------------|---|------|---|------|---|------|---|---|------|
|                    | * | 8760                                                                                           | * | 8780 | * | 8800 | * | 8820 | * |   |      |
| BAC_clone_Om       | : | GCCACCCAAAGTGTGGGATTACAGGCGTGAGCCACTGCATCCGGCCTCACCTTTCCCATTTTTAAGTGTAAAGTCCAGTGGTCAGGGATACATT |   |      |   |      |   |      |   | : | 8835 |
| AOTVOKIR3DL4*01    | : | -----                                                                                          |   |      |   |      |   |      |   | : | -    |
| AOTVOKIR3DL4*02    | : | -----                                                                                          |   |      |   |      |   |      |   | : | -    |
| AOTVOKIR3DL4*02v1  | : | -----                                                                                          |   |      |   |      |   |      |   | : | -    |
| AOTVOKIR3DL4*02v2  | : | -----                                                                                          |   |      |   |      |   |      |   | : | -    |
| AOTVOKIR3DL4*03    | : | -----                                                                                          |   |      |   |      |   |      |   | : | -    |
| AOTVOKIR3DS4*04    | : | -----                                                                                          |   |      |   |      |   |      |   | : | -    |
| AOTVOKIR3DS4*04v1  | : | -----                                                                                          |   |      |   |      |   |      |   | : | -    |
| AOTVOKIR3DS5*01    | : | -----                                                                                          |   |      |   |      |   |      |   | : | -    |
| AOTVOKIR2DS5*01v1  | : | -----                                                                                          |   |      |   |      |   |      |   | : | -    |
| AOTVOKIR2DS5*01v2  | : | -----                                                                                          |   |      |   |      |   |      |   | : | -    |
| AOTVOKIR3DS7*01    | : | -----                                                                                          |   |      |   |      |   |      |   | : | -    |
| AOTVOKIR3DS7*01v1  | : | -----                                                                                          |   |      |   |      |   |      |   | : | -    |
| AOTVOKIR3DL8*01    | : | -----                                                                                          |   |      |   |      |   |      |   | : | -    |
| AOTVOKIR3DL8*01v1  | : | -----                                                                                          |   |      |   |      |   |      |   | : | -    |
| AOTVOKIR3DS8*01v2  | : | -----                                                                                          |   |      |   |      |   |      |   | : | -    |
| AOTVOKIR3DL8*02    | : | -----                                                                                          |   |      |   |      |   |      |   | : | -    |
| AOTVOKIR4DL9*01    | : | -----                                                                                          |   |      |   |      |   |      |   | : | -    |
| AOTVOKIR4DS9*01v1  | : | -----                                                                                          |   |      |   |      |   |      |   | : | -    |
| AOTVOKIR3DL9*01v2  | : | -----                                                                                          |   |      |   |      |   |      |   | : | -    |
| AOTVOKIR4DL9*02    | : | -----                                                                                          |   |      |   |      |   |      |   | : | -    |
| AOTVOKIR4DL10*01   | : | -----                                                                                          |   |      |   |      |   |      |   | : | -    |
| AOTVOKIR3DL10*01v1 | : | -----                                                                                          |   |      |   |      |   |      |   | : | -    |
| AOTVOKIR4DS10*01v2 | : | -----                                                                                          |   |      |   |      |   |      |   | : | -    |
| AOTVOKIR3DS10*01v3 | : | -----                                                                                          |   |      |   |      |   |      |   | : | -    |
| AOTVOKIR3DS10*01v4 | : | -----                                                                                          |   |      |   |      |   |      |   | : | -    |

|                   |   |                                                                                                  |   |      |   |      |   |      |   |      |   |   |      |
|-------------------|---|--------------------------------------------------------------------------------------------------|---|------|---|------|---|------|---|------|---|---|------|
|                   |   | 8840                                                                                             | * | 8860 | * | 8880 | * | 8900 | * | 8920 | * |   |      |
| BAC_clone_Om      | : | TATATTCTTTTTTTCGTTGTTACCCTCCACCATTCCCTTCCCGGCCTCTGGTAGCCACCATTCTCTCTACCTTCCCTGAGATCCACCTGTTAGCTC |   |      |   |      |   |      |   |      |   | : | 8930 |
| AOTVOKIR3DL4*01   | : | -----                                                                                            |   |      |   |      |   |      |   |      |   | : | -    |
| AOTVOKIR3DL4*02   | : | -----                                                                                            |   |      |   |      |   |      |   |      |   | : | -    |
| AOTVOKIR3DL4*02v1 | : | -----                                                                                            |   |      |   |      |   |      |   |      |   | : | -    |
| AOTVOKIR3DL4*02v2 | : | -----                                                                                            |   |      |   |      |   |      |   |      |   | : | -    |
| AOTVOKIR3DL4*03   | : | -----                                                                                            |   |      |   |      |   |      |   |      |   | : | -    |
| AOTVOKIR3DS4*04   | : | -----                                                                                            |   |      |   |      |   |      |   |      |   | : | -    |
| AOTVOKIR3DS4*04v1 | : | -----                                                                                            |   |      |   |      |   |      |   |      |   | : | -    |
| AOTVOKIR3DS5*01   | : | -----                                                                                            |   |      |   |      |   |      |   |      |   | : | -    |
| AOTVOKIR2DS5*01v1 | : | -----                                                                                            |   |      |   |      |   |      |   |      |   | : | -    |
| AOTVOKIR2DS5*01v2 | : | -----                                                                                            |   |      |   |      |   |      |   |      |   | : | -    |
| AOTVOKIR3DS7*01   | : | -----                                                                                            |   |      |   |      |   |      |   |      |   | : | -    |
| AOTVOKIR3DS7*01v1 | : | -----                                                                                            |   |      |   |      |   |      |   |      |   | : | -    |
| AOTVOKIR3DL8*01   | : | -----                                                                                            |   |      |   |      |   |      |   |      |   | : | -    |
| AOTVOKIR3DL8*01v1 | : | -----                                                                                            |   |      |   |      |   |      |   |      |   | : | -    |

```

AOTVOKIR3DS8*01v2 : ----- : -
AOTVOKIR3DL8*02   : ----- : -
AOTVOKIR4DL9*01   : ----- : -
AOTVOKIR4DS9*01v1 : ----- : -
AOTVOKIR3DL9*01v2 : ----- : -
AOTVOKIR4DL9*02   : ----- : -
AOTVOKIR4DL10*01  : ----- : -
AOTVOKIR3DL10*01v1 : ----- : -
AOTVOKIR4DS10*01v2 : ----- : -
AOTVOKIR3DS10*01v3 : ----- : -
AOTVOKIR3DS10*01v4 : ----- : -

```

```

                8940      *      8960      *      8980      *      9000      *      9020
BAC_clone_Om    : CTGCATATGGGTGAGACATGGCCATCTTTGTAATGCCCTCCAGTTCATCCATGTGTCTGGAAGTGACAGGACGTTGTTGCTTGTATGGAGGAGTG : 9025
AOTVOKIR3DL4*01 : ----- : -
AOTVOKIR3DL4*02 : ----- : -
AOTVOKIR3DL4*02v1 : ----- : -
AOTVOKIR3DL4*02v2 : ----- : -
AOTVOKIR3DL4*03 : ----- : -
AOTVOKIR3DS4*04 : ----- : -
AOTVOKIR3DS4*04v1 : ----- : -
AOTVOKIR3DS5*01 : ----- : -
AOTVOKIR2DS5*01v1 : ----- : -
AOTVOKIR2DS5*01v2 : ----- : -
AOTVOKIR3DS7*01 : ----- : -
AOTVOKIR3DS7*01v1 : ----- : -
AOTVOKIR3DL8*01 : ----- : -
AOTVOKIR3DL8*01v1 : ----- : -
AOTVOKIR3DS8*01v2 : ----- : -
AOTVOKIR3DL8*02 : ----- : -
AOTVOKIR4DL9*01 : ----- : -
AOTVOKIR4DS9*01v1 : ----- : -
AOTVOKIR3DL9*01v2 : ----- : -
AOTVOKIR4DL9*02 : ----- : -
AOTVOKIR4DL10*01 : ----- : -
AOTVOKIR3DL10*01v1 : ----- : -
AOTVOKIR4DS10*01v2 : ----- : -
AOTVOKIR3DS10*01v3 : ----- : -
AOTVOKIR3DS10*01v4 : ----- : -

```

```

                *      9040      *      9060      *      9080      *      9100      *      9120
BAC_clone_Om    : GTCTCCATTGTGCGTATGTGCTACGTTCTCTCTATCCGCTCACCCGCTGATGGGCAGGTGGGTTCACTGCACGCCTTGGCTACTGTGAATTGTGC : 9120
AOTVOKIR3DL4*01 : ----- : -
AOTVOKIR3DL4*02 : ----- : -

```

```

AOTVOKIR3DL4*02v1 : ----- : -
AOTVOKIR3DL4*02v2 : ----- : -
AOTVOKIR3DL4*03   : ----- : -
AOTVOKIR3DS4*04   : ----- : -
AOTVOKIR3DS4*04v1 : ----- : -
AOTVOKIR3DS5*01   : ----- : -
AOTVOKIR2DS5*01v1 : ----- : -
AOTVOKIR2DS5*01v2 : ----- : -
AOTVOKIR3DS7*01   : ----- : -
AOTVOKIR3DS7*01v1 : ----- : -
AOTVOKIR3DL8*01   : ----- : -
AOTVOKIR3DL8*01v1 : ----- : -
AOTVOKIR3DS8*01v2 : ----- : -
AOTVOKIR3DL8*02   : ----- : -
AOTVOKIR4DL9*01   : ----- : -
AOTVOKIR4DS9*01v1 : ----- : -
AOTVOKIR3DL9*01v2 : ----- : -
AOTVOKIR4DL9*02   : ----- : -
AOTVOKIR4DL10*01  : ----- : -
AOTVOKIR3DL10*01v1 : ----- : -
AOTVOKIR4DS10*01v2 : ----- : -
AOTVOKIR3DS10*01v3 : ----- : -
AOTVOKIR3DS10*01v4 : ----- : -

```

```

          *      9140          *      9160          *      9180          *      9200          *
BAC_clone_Om : TGCACCAATCATGGGAGCGCAGATATCACTCCGATACTGATGTCCTTTTCCTTTGGGTGTAAACCCAGTAGTGAAATTGCTGGATACTATGAAA : 9215
AOTVOKIR3DL4*01 : ----- : -
AOTVOKIR3DL4*02 : ----- : -
AOTVOKIR3DL4*02v1 : ----- : -
AOTVOKIR3DL4*02v2 : ----- : -
AOTVOKIR3DL4*03 : ----- : -
AOTVOKIR3DS4*04 : ----- : -
AOTVOKIR3DS4*04v1 : ----- : -
AOTVOKIR3DS5*01 : ----- : -
AOTVOKIR2DS5*01v1 : ----- : -
AOTVOKIR2DS5*01v2 : ----- : -
AOTVOKIR3DS7*01 : ----- : -
AOTVOKIR3DS7*01v1 : ----- : -
AOTVOKIR3DL8*01 : ----- : -
AOTVOKIR3DL8*01v1 : ----- : -
AOTVOKIR3DS8*01v2 : ----- : -
AOTVOKIR3DL8*02 : ----- : -
AOTVOKIR4DL9*01 : ----- : -
AOTVOKIR4DS9*01v1 : ----- : -
AOTVOKIR3DL9*01v2 : ----- : -

```

AOTVOKIR4DL9\*02 : ----- : -  
AOTVOKIR4DL10\*01 : ----- : -  
AOTVOKIR3DL10\*01v1 : ----- : -  
AOTVOKIR4DS10\*01v2 : ----- : -  
AOTVOKIR3DS10\*01v3 : ----- : -  
AOTVOKIR3DS10\*01v4 : ----- : -

9220 \* 9240 \* 9260 \* 9280 \* 9300 \*  
BAC\_clone\_Om : GTTCTCTTTTGTAGCTTTTTTTTTTCTTGAGATGGAGTTTCCCTCTGTAGCCCAGGCTGGAGGGCAGTGGCACCATCTTGGCTCATTGCAGCCTC : 9310  
AOTVOKIR3DL4\*01 : ----- : -  
AOTVOKIR3DL4\*02 : ----- : -  
AOTVOKIR3DL4\*02v1 : ----- : -  
AOTVOKIR3DL4\*02v2 : ----- : -  
AOTVOKIR3DL4\*03 : ----- : -  
AOTVOKIR3DS4\*04 : ----- : -  
AOTVOKIR3DS4\*04v1 : ----- : -  
AOTVOKIR3DS5\*01 : ----- : -  
AOTVOKIR2DS5\*01v1 : ----- : -  
AOTVOKIR2DS5\*01v2 : ----- : -  
AOTVOKIR3DS7\*01 : ----- : -  
AOTVOKIR3DS7\*01v1 : ----- : -  
AOTVOKIR3DL8\*01 : ----- : -  
AOTVOKIR3DL8\*01v1 : ----- : -  
AOTVOKIR3DS8\*01v2 : ----- : -  
AOTVOKIR3DL8\*02 : ----- : -  
AOTVOKIR4DL9\*01 : ----- : -  
AOTVOKIR4DS9\*01v1 : ----- : -  
AOTVOKIR3DL9\*01v2 : ----- : -  
AOTVOKIR4DL9\*02 : ----- : -  
AOTVOKIR4DL10\*01 : ----- : -  
AOTVOKIR3DL10\*01v1 : ----- : -  
AOTVOKIR4DS10\*01v2 : ----- : -  
AOTVOKIR3DS10\*01v3 : ----- : -  
AOTVOKIR3DS10\*01v4 : ----- : -

9320 \* 9340 \* 9360 \* 9380 \* 9400 \*  
BAC\_clone\_Om : TGCCTCCTGGGTTTCACAGGATTCTCCTACCTCAGCCTCCCTAGTAGGAATTTTCCCTCTTTGACACAAGGGCCCTCCTTGTTCATTGACCTCAGCT : 9405  
AOTVOKIR3DL4\*01 : ----- : -  
AOTVOKIR3DL4\*02 : ----- : -  
AOTVOKIR3DL4\*02v1 : ----- : -  
AOTVOKIR3DL4\*02v2 : ----- : -  
AOTVOKIR3DL4\*03 : ----- : -  
AOTVOKIR3DS4\*04 : ----- : -  
AOTVOKIR3DS4\*04v1 : ----- : -

```

AOTVOKIR3DS5*01      : ----- : -
AOTVOKIR2DS5*01v1   : ----- : -
AOTVOKIR2DS5*01v2   : ----- : -
AOTVOKIR3DS7*01     : ----- : -
AOTVOKIR3DS7*01v1   : ----- : -
AOTVOKIR3DL8*01     : ----- : -
AOTVOKIR3DL8*01v1   : ----- : -
AOTVOKIR3DS8*01v2   : ----- : -
AOTVOKIR3DL8*02     : ----- : -
AOTVOKIR4DL9*01     : ----- : -
AOTVOKIR4DS9*01v1   : ----- : -
AOTVOKIR3DL9*01v2   : ----- : -
AOTVOKIR4DL9*02     : ----- : -
AOTVOKIR4DL10*01    : ----- : -
AOTVOKIR3DL10*01v1  : ----- : -
AOTVOKIR4DS10*01v2  : ----- : -
AOTVOKIR3DS10*01v3  : ----- : -
AOTVOKIR3DS10*01v4  : ----- : -

```

```

          *      9420          *      9440          *      9460          *      9480          *      9500
BAC_clone_Om      : AAACATATGGCCATTTATAAATAGAGGAAACATTAATGAATTTAAAGCTTTTCCTGATTTTTGTAACTAATAGTTGCACGTTTTCTTAGTCTCTTTC : 9500
AOTVOKIR3DL4*01   : ----- : -
AOTVOKIR3DL4*02   : ----- : -
AOTVOKIR3DL4*02v1 : ----- : -
AOTVOKIR3DL4*02v2 : ----- : -
AOTVOKIR3DL4*03   : ----- : -
AOTVOKIR3DS4*04   : ----- : -
AOTVOKIR3DS4*04v1 : ----- : -
AOTVOKIR3DS5*01   : ----- : -
AOTVOKIR2DS5*01v1 : ----- : -
AOTVOKIR2DS5*01v2 : ----- : -
AOTVOKIR3DS7*01   : ----- : -
AOTVOKIR3DS7*01v1 : ----- : -
AOTVOKIR3DL8*01   : ----- : -
AOTVOKIR3DL8*01v1 : ----- : -
AOTVOKIR3DS8*01v2 : ----- : -
AOTVOKIR3DL8*02   : ----- : -
AOTVOKIR4DL9*01   : ----- : -
AOTVOKIR4DS9*01v1 : ----- : -
AOTVOKIR3DL9*01v2 : ----- : -
AOTVOKIR4DL9*02   : ----- : -
AOTVOKIR4DL10*01  : ----- : -
AOTVOKIR3DL10*01v1 : ----- : -
AOTVOKIR4DS10*01v2 : ----- : -
AOTVOKIR3DS10*01v3 : ----- : -

```

```

AOTVOKIR3DS10*01v4 : ----- : -

          *      9520          *      9540          *      9560          *      9580          *
BAC_clone_Om       : CAAGTCCTTGCAAATTACAGGTACACGCTACCACGCCTGGCTAATTTTTGTATTTTTTAGTACAGACAGGGTTTCACCAGGTTGGCTAGCCTGCT : 9595
AOTVOKIR3DL4*01    : ----- : -
AOTVOKIR3DL4*02    : ----- : -
AOTVOKIR3DL4*02v1  : ----- : -
AOTVOKIR3DL4*02v2  : ----- : -
AOTVOKIR3DL4*03    : ----- : -
AOTVOKIR3DS4*04    : ----- : -
AOTVOKIR3DS4*04v1  : ----- : -
AOTVOKIR3DS5*01    : ----- : -
AOTVOKIR2DS5*01v1  : ----- : -
AOTVOKIR2DS5*01v2  : ----- : -
AOTVOKIR3DS7*01    : ----- : -
AOTVOKIR3DS7*01v1  : ----- : -
AOTVOKIR3DL8*01    : ----- : -
AOTVOKIR3DL8*01v1  : ----- : -
AOTVOKIR3DS8*01v2  : ----- : -
AOTVOKIR3DL8*02    : ----- : -
AOTVOKIR4DL9*01    : ----- : -
AOTVOKIR4DS9*01v1  : ----- : -
AOTVOKIR3DL9*01v2  : ----- : -
AOTVOKIR4DL9*02    : ----- : -
AOTVOKIR4DL10*01   : ----- : -
AOTVOKIR3DL10*01v1 : ----- : -
AOTVOKIR4DS10*01v2 : ----- : -
AOTVOKIR3DS10*01v3 : ----- : -
AOTVOKIR3DS10*01v4 : ----- : -

          9600          *      9620          *      9640          *      9660          *      9680          *
BAC_clone_Om       : CGCAAATTCCTGACCACAAGTGAGGTGCCCCACCTCGGTTTCCCAAAGTGCTGGGATTACAGACGTGAGCCAACACGCCTGTCCGATTTCTAGTTA : 9690
AOTVOKIR3DL4*01    : ----- : -
AOTVOKIR3DL4*02    : ----- : -
AOTVOKIR3DL4*02v1  : ----- : -
AOTVOKIR3DL4*02v2  : ----- : -
AOTVOKIR3DL4*03    : ----- : -
AOTVOKIR3DS4*04    : ----- : -
AOTVOKIR3DS4*04v1  : ----- : -
AOTVOKIR3DS5*01    : ----- : -
AOTVOKIR2DS5*01v1  : ----- : -
AOTVOKIR2DS5*01v2  : ----- : -
AOTVOKIR3DS7*01    : ----- : -
AOTVOKIR3DS7*01v1  : ----- : -

```



```

AOTVOKIR3DL8*01      : ----- : -
AOTVOKIR3DL8*01v1    : ----- : -
AOTVOKIR3DS8*01v2    : ----- : -
AOTVOKIR3DL8*02      : ----- : -
AOTVOKIR4DL9*01      : ----- : -
AOTVOKIR4DS9*01v1    : ----- : -
AOTVOKIR3DL9*01v2    : ----- : -
AOTVOKIR4DL9*02      : ----- : -
AOTVOKIR4DL10*01     : ----- : -
AOTVOKIR3DL10*01v1   : ----- : -
AOTVOKIR4DS10*01v2   : ----- : -
AOTVOKIR3DS10*01v3   : ----- : -
AOTVOKIR3DS10*01v4   : ----- : -

```

```

          9700      *      9720      *      9740      *      9760      *      9780
BAC_clone_Om      : TTAATCCCATCTCAGAATCATCGTTTGCGAATAGTTGCTCTCATTCTGTGGGTTGTCTCATCACTTCTTTGGTTTATCTTTTCGTGGTGCAGAAGT : 9785
AOTVOKIR3DL4*01   : ----- : -
AOTVOKIR3DL4*02   : ----- : -
AOTVOKIR3DL4*02v1 : ----- : -
AOTVOKIR3DL4*02v2 : ----- : -
AOTVOKIR3DL4*03   : ----- : -
AOTVOKIR3DS4*04   : ----- : -
AOTVOKIR3DS4*04v1 : ----- : -
AOTVOKIR3DS5*01   : ----- : -
AOTVOKIR2DS5*01v1 : ----- : -
AOTVOKIR2DS5*01v2 : ----- : -
AOTVOKIR3DS7*01   : ----- : -
AOTVOKIR3DS7*01v1 : ----- : -
AOTVOKIR3DL8*01   : ----- : -
AOTVOKIR3DL8*01v1 : ----- : -
AOTVOKIR3DS8*01v2 : ----- : -
AOTVOKIR3DL8*02   : ----- : -
AOTVOKIR4DL9*01   : ----- : -
AOTVOKIR4DS9*01v1 : ----- : -
AOTVOKIR3DL9*01v2 : ----- : -
AOTVOKIR4DL9*02   : ----- : -
AOTVOKIR4DL10*01  : ----- : -
AOTVOKIR3DL10*01v1 : ----- : -
AOTVOKIR4DS10*01v2 : ----- : -
AOTVOKIR3DS10*01v3 : ----- : -
AOTVOKIR3DS10*01v4 : ----- : -

```

```

          *      9800      *      9820      *      9840      *      9860      *      9880
BAC_clone_Om      : TGCTTCGTTTGATGCAATCCCAATGGTCTATTTTTTGCTTTGATTACTTGTGTTTTTAAGGTTTTAAACAAAATGTCTTTTCTCATGCAAATGTC : 9880

```

```

AOTVOKIR3DL4*01 : ----- : -
AOTVOKIR3DL4*02 : ----- : -
AOTVOKIR3DL4*02v1 : ----- : -
AOTVOKIR3DL4*02v2 : ----- : -
AOTVOKIR3DL4*03 : ----- : -
AOTVOKIR3DS4*04 : ----- : -
AOTVOKIR3DS4*04v1 : ----- : -
AOTVOKIR3DS5*01 : ----- : -
AOTVOKIR2DS5*01v1 : ----- : -
AOTVOKIR2DS5*01v2 : ----- : -
AOTVOKIR3DS7*01 : ----- : -
AOTVOKIR3DS7*01v1 : ----- : -
AOTVOKIR3DL8*01 : ----- : -
AOTVOKIR3DL8*01v1 : ----- : -
AOTVOKIR3DS8*01v2 : ----- : -
AOTVOKIR3DL8*02 : ----- : -
AOTVOKIR4DL9*01 : ----- : -
AOTVOKIR4DS9*01v1 : ----- : -
AOTVOKIR3DL9*01v2 : ----- : -
AOTVOKIR4DL9*02 : ----- : -
AOTVOKIR4DL10*01 : ----- : -
AOTVOKIR3DL10*01v1 : ----- : -
AOTVOKIR4DS10*01v2 : ----- : -
AOTVOKIR3DS10*01v3 : ----- : -
AOTVOKIR3DS10*01v4 : ----- : -

```

```

          *          9900          *          9920          *          9940          *          9960          *
BAC_clone_Om : CTGGAGCATTTCCTCCAGTGTCTTCTCTACACATTTTCATAGGTTTCAGGCCTTAGATGCACGTCTTTCATCCATTTTCATTTGATTTTTGTGTATG : 9975
AOTVOKIR3DL4*01 : ----- : -
AOTVOKIR3DL4*02 : ----- : -
AOTVOKIR3DL4*02v1 : ----- : -
AOTVOKIR3DL4*02v2 : ----- : -
AOTVOKIR3DL4*03 : ----- : -
AOTVOKIR3DS4*04 : ----- : -
AOTVOKIR3DS4*04v1 : ----- : -
AOTVOKIR3DS5*01 : ----- : -
AOTVOKIR2DS5*01v1 : ----- : -
AOTVOKIR2DS5*01v2 : ----- : -
AOTVOKIR3DS7*01 : ----- : -
AOTVOKIR3DS7*01v1 : ----- : -
AOTVOKIR3DL8*01 : ----- : -
AOTVOKIR3DL8*01v1 : ----- : -
AOTVOKIR3DS8*01v2 : ----- : -
AOTVOKIR3DL8*02 : ----- : -
AOTVOKIR4DL9*01 : ----- : -

```

AOTVOKIR4DS9\*01v1 : ----- : -  
AOTVOKIR3DL9\*01v2 : ----- : -  
AOTVOKIR4DL9\*02 : ----- : -  
AOTVOKIR4DL10\*01 : ----- : -  
AOTVOKIR3DL10\*01v1 : ----- : -  
AOTVOKIR4DS10\*01v2 : ----- : -  
AOTVOKIR3DS10\*01v3 : ----- : -  
AOTVOKIR3DS10\*01v4 : ----- : -

9980 \* 10000 \* 10020 \* 10040 \* 10060 \*  
BAC\_clone\_Om : CTGAGAGGTAGAGGTGCAGTTTCATCCCTGCACTGTTTATTGAAAAGACTGTCCTTTCCTGAGTGTACGTTTCTTAGCACCCCTTGTCAAAGTCCAT : 10070  
AOTVOKIR3DL4\*01 : ----- : -  
AOTVOKIR3DL4\*02 : ----- : -  
AOTVOKIR3DL4\*02v1 : ----- : -  
AOTVOKIR3DL4\*02v2 : ----- : 973  
AOTVOKIR3DL4\*03 : ----- : -  
AOTVOKIR3DS4\*04 : ----- : -  
AOTVOKIR3DS4\*04v1 : ----- : -  
AOTVOKIR3DS5\*01 : ----- : -  
AOTVOKIR2DS5\*01v1 : ----- : -  
AOTVOKIR2DS5\*01v2 : ----- : -  
AOTVOKIR3DS7\*01 : ----- : -  
AOTVOKIR3DS7\*01v1 : ----- : -  
AOTVOKIR3DL8\*01 : ----- : -  
AOTVOKIR3DL8\*01v1 : ----- : -  
AOTVOKIR3DS8\*01v2 : ----- : -  
AOTVOKIR3DL8\*02 : ----- : -  
AOTVOKIR4DL9\*01 : ----- : -  
AOTVOKIR4DS9\*01v1 : ----- : -  
AOTVOKIR3DL9\*01v2 : ----- : -  
AOTVOKIR4DL9\*02 : ----- : -  
AOTVOKIR4DL10\*01 : ----- : -  
AOTVOKIR3DL10\*01v1 : ----- : -  
AOTVOKIR4DS10\*01v2 : ----- : -  
AOTVOKIR3DS10\*01v3 : ----- : -  
AOTVOKIR3DS10\*01v4 : ----- : -

10080 \* 10100 \* 10120 \* 10140 \* 10160 \*  
BAC\_clone\_Om : TGGATGGGCTGTGCATGGTGGCTCACACCTGCAATCCCAGCACTTTGGGAGACCAAGGTAGGTGGATCACCTGTGGCCAGGAGTTCGAGACCAGC : 10165  
AOTVOKIR3DL4\*01 : ----- : -  
AOTVOKIR3DL4\*02 : ----- : -  
AOTVOKIR3DL4\*02v1 : ----- : -  
AOTVOKIR3DL4\*02v2 : TGGATGGGCTGTGCATGGTGGCTCACGCCTGCAATCCCAGCACTTTGGGAGACCAAG : 1030  
AOTVOKIR3DL4\*03 : ----- : -

```

AOTVOKIR3DS4*04      : ----- : -
AOTVOKIR3DS4*04v1    : ----- : -
AOTVOKIR3DS5*01      : ----- : -
AOTVOKIR2DS5*01v1    : ----- : -
AOTVOKIR2DS5*01v2    : ----- : -
AOTVOKIR3DS7*01      : ----- : -
AOTVOKIR3DS7*01v1    : ----- : -
AOTVOKIR3DL8*01      : ----- : -
AOTVOKIR3DL8*01v1    : ----- : -
AOTVOKIR3DS8*01v2    : ----- : -
AOTVOKIR3DL8*02      : ----- : -
AOTVOKIR4DL9*01      : ----- : -
AOTVOKIR4DS9*01v1    : ----- : -
AOTVOKIR3DL9*01v2    : ----- : -
AOTVOKIR4DL9*02      : ----- : -
AOTVOKIR4DL10*01     : ----- : -
AOTVOKIR3DL10*01v1   : ----- : -
AOTVOKIR4DS10*01v2   : ----- : -
AOTVOKIR3DS10*01v3   : ----- : -
AOTVOKIR3DS10*01v4   : ----- : -

```

```

          *      10180          *      10200          *      10220          *      10240          *      10260
BAC_clone_Om      : CTGGCCGACATGGTGA AACCCCTTCTCCACTAAAAGTACAAA ACTCAGCTGAGCATAGTGGTTGGTGCCTGTTATACCACTAGTCAGGTGTCTGA : 10260
AOTVOKIR3DL4*01   : ----- : -
AOTVOKIR3DL4*02   : ----- : -
AOTVOKIR3DL4*02v1 : ----- : -
AOTVOKIR3DL4*02v2 : ----- : -
AOTVOKIR3DL4*03   : ----- : -
AOTVOKIR3DS4*04   : ----- : -
AOTVOKIR3DS4*04v1 : ----- : -
AOTVOKIR3DS5*01   : ----- : -
AOTVOKIR2DS5*01v1 : ----- : -
AOTVOKIR2DS5*01v2 : ----- : -
AOTVOKIR3DS7*01   : ----- : -
AOTVOKIR3DS7*01v1 : ----- : -
AOTVOKIR3DL8*01   : ----- : -
AOTVOKIR3DL8*01v1 : ----- : -
AOTVOKIR3DS8*01v2 : ----- : -
AOTVOKIR3DL8*02   : ----- : -
AOTVOKIR4DL9*01   : ----- : -
AOTVOKIR4DS9*01v1 : ----- : -
AOTVOKIR3DL9*01v2 : ----- : -
AOTVOKIR4DL9*02   : ----- : -
AOTVOKIR4DL10*01  : ----- : -
AOTVOKIR3DL10*01v1 : ----- : -

```

AOTVOKIR4DS10\*01v2 : ----- : -  
AOTVOKIR3DS10\*01v3 : ----- : -  
AOTVOKIR3DS10\*01v4 : ----- : -

                  \*      10280                  \*      10300                  \*      10320                  \*      10340                  \*  
BAC\_clone\_Om      : GGCAAGAGACTTGCTTCAAACCAAGAGATGGAGGTTGCAGTGACCTGAAATTGCACCTCTGCACTACAGCCTGGGTGACAGAGCGAGATTCCATC : 10355  
AOTVOKIR3DL4\*01   : ----- : -  
AOTVOKIR3DL4\*02   : ----- : -  
AOTVOKIR3DL4\*02v1 : ----- : -  
AOTVOKIR3DL4\*02v2 : ----- : -  
AOTVOKIR3DL4\*03   : ----- : -  
AOTVOKIR3DS4\*04   : ----- : -  
AOTVOKIR3DS4\*04v1 : ----- : -  
AOTVOKIR3DS5\*01   : ----- : -  
AOTVOKIR2DS5\*01v1 : ----- : -  
AOTVOKIR2DS5\*01v2 : ----- : -  
AOTVOKIR3DS7\*01   : ----- : -  
AOTVOKIR3DS7\*01v1 : ----- : -  
AOTVOKIR3DL8\*01   : ----- : -  
AOTVOKIR3DL8\*01v1 : ----- : -  
AOTVOKIR3DS8\*01v2 : ----- : -  
AOTVOKIR3DL8\*02   : ----- : -  
AOTVOKIR4DL9\*01   : ----- : -  
AOTVOKIR4DS9\*01v1 : ----- : -  
AOTVOKIR3DL9\*01v2 : ----- : -  
AOTVOKIR4DL9\*02   : ----- : -  
AOTVOKIR4DL10\*01  : ----- : -  
AOTVOKIR3DL10\*01v1 : ----- : -  
AOTVOKIR4DS10\*01v2 : ----- : -  
AOTVOKIR3DS10\*01v3 : ----- : -  
AOTVOKIR3DS10\*01v4 : ----- : -

                  10360                  \*      10380                  \*      10400                  \*      10420                  \*      10440                  \*  
BAC\_clone\_Om      : TCAAAAAAAAAAAAAAAAAAAGCCATTGGATGTAAATGCATGGGTTATGTCTGTGTTCTTCATTCTCCTCCATTGTTCTATGAGCCTTCTTTAT : 10450  
AOTVOKIR3DL4\*01   : ----- : -  
AOTVOKIR3DL4\*02   : ----- : -  
AOTVOKIR3DL4\*02v1 : ----- : -  
AOTVOKIR3DL4\*02v2 : ----- : -  
AOTVOKIR3DL4\*03   : ----- : -  
AOTVOKIR3DS4\*04   : ----- : -  
AOTVOKIR3DS4\*04v1 : ----- : -  
AOTVOKIR3DS5\*01   : ----- : -  
AOTVOKIR2DS5\*01v1 : ----- : -  
AOTVOKIR2DS5\*01v2 : ----- : -

AOTVOKIR3DS7\*01 : ----- : -  
AOTVOKIR3DS7\*01v1 : ----- : -  
AOTVOKIR3DL8\*01 : ----- : -  
AOTVOKIR3DL8\*01v1 : ----- : -  
AOTVOKIR3DS8\*01v2 : ----- : -  
AOTVOKIR3DL8\*02 : ----- : -  
AOTVOKIR4DL9\*01 : ----- : -  
AOTVOKIR4DS9\*01v1 : ----- : -  
AOTVOKIR3DL9\*01v2 : ----- : -  
AOTVOKIR4DL9\*02 : ----- : -  
AOTVOKIR4DL10\*01 : ----- : -  
AOTVOKIR3DL10\*01v1 : ----- : -  
AOTVOKIR4DS10\*01v2 : ----- : -  
AOTVOKIR3DS10\*01v3 : ----- : -  
AOTVOKIR3DS10\*01v4 : ----- : -

10460 \* 10480 \* 10500 \* 10520 \* 10540  
BAC\_clone\_Om : GCCAGCATCATGCTGTTTTGCTTACTACAGCTCTGTAACATATTTTTAAGTCAGGTAGTGTGATGGCCTGTTTTCTCATTATACCTCAAAGTCTC : 10545  
AOTVOKIR3DL4\*01 : ----- : -  
AOTVOKIR3DL4\*02 : ----- : -  
AOTVOKIR3DL4\*02v1 : ----- : -  
AOTVOKIR3DL4\*02v2 : ----- : -  
AOTVOKIR3DL4\*03 : ----- : -  
AOTVOKIR3DS4\*04 : ----- : -  
AOTVOKIR3DS4\*04v1 : ----- : -  
AOTVOKIR3DS5\*01 : ----- : -  
AOTVOKIR2DS5\*01v1 : ----- : -  
AOTVOKIR2DS5\*01v2 : ----- : -  
AOTVOKIR3DS7\*01 : ----- : -  
AOTVOKIR3DS7\*01v1 : -----TCTC : 950  
AOTVOKIR3DL8\*01 : ----- : -  
AOTVOKIR3DL8\*01v1 : ----- : -  
AOTVOKIR3DS8\*01v2 : ----- : -  
AOTVOKIR3DL8\*02 : ----- : -  
AOTVOKIR4DL9\*01 : ----- : -  
AOTVOKIR4DS9\*01v1 : ----- : -  
AOTVOKIR3DL9\*01v2 : ----- : -  
AOTVOKIR4DL9\*02 : ----- : -  
AOTVOKIR4DL10\*01 : ----- : -  
AOTVOKIR3DL10\*01v1 : ----- : -  
AOTVOKIR4DS10\*01v2 : ----- : -  
AOTVOKIR3DS10\*01v3 : ----- : -  
AOTVOKIR3DS10\*01v4 : ----- : -

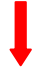

TCTC

|                    |   |                                                                                                 |   |       |   |       |   |       |   |       |   |       |
|--------------------|---|-------------------------------------------------------------------------------------------------|---|-------|---|-------|---|-------|---|-------|---|-------|
|                    | * | 10560                                                                                           | * | 10580 | * | 10600 | * | 10620 | * | 10640 |   |       |
| BAC_clone_Om       | : | AGGACAGTGGGCATCAGGTACAATGATTATGGAGAAGGGGATGCCAGGACTTCCAGGGCCCAACATTAGATAACAGAATGTTGGCCATGAACCAA |   |       |   |       |   |       |   |       | : | 10640 |
| AOTVOKIR3DL4*01    | : | -----                                                                                           |   |       |   |       |   |       |   |       | : | -     |
| AOTVOKIR3DL4*02    | : | -----                                                                                           |   |       |   |       |   |       |   |       | : | -     |
| AOTVOKIR3DL4*02v1  | : | -----                                                                                           |   |       |   |       |   |       |   |       | : | -     |
| AOTVOKIR3DL4*02v2  | : | -----                                                                                           |   |       |   |       |   |       |   |       | : | -     |
| AOTVOKIR3DL4*03    | : | -----                                                                                           |   |       |   |       |   |       |   |       | : | -     |
| AOTVOKIR3DS4*04    | : | -----                                                                                           |   |       |   |       |   |       |   |       | : | -     |
| AOTVOKIR3DS4*04v1  | : | -----                                                                                           |   |       |   |       |   |       |   |       | : | -     |
| AOTVOKIR3DS5*01    | : | -----                                                                                           |   |       |   |       |   |       |   |       | : | -     |
| AOTVOKIR2DS5*01v1  | : | -----                                                                                           |   |       |   |       |   |       |   |       | : | -     |
| AOTVOKIR2DS5*01v2  | : | -----                                                                                           |   |       |   |       |   |       |   |       | : | -     |
| AOTVOKIR3DS7*01    | : | -----                                                                                           |   |       |   |       |   |       |   |       | : | -     |
| AOTVOKIR3DS7*01v1  | : | AGGACAGTGGGCATCAGGTACAATGATTATGGAGAAGGGGATGCCAGGACTCCCAGG-CCCAACATTAGATAACAGAGTGTGGCCATGAACAAA  |   |       |   |       |   |       |   |       | : | 1044  |
| AOTVOKIR3DL8*01    | : | -----                                                                                           |   |       |   |       |   |       |   |       | : | -     |
| AOTVOKIR3DL8*01v1  | : | -----                                                                                           |   |       |   |       |   |       |   |       | : | -     |
| AOTVOKIR3DS8*01v2  | : | -----                                                                                           |   |       |   |       |   |       |   |       | : | -     |
| AOTVOKIR3DL8*02    | : | -----                                                                                           |   |       |   |       |   |       |   |       | : | -     |
| AOTVOKIR4DL9*01    | : | -----                                                                                           |   |       |   |       |   |       |   |       | : | -     |
| AOTVOKIR4DS9*01v1  | : | -----                                                                                           |   |       |   |       |   |       |   |       | : | -     |
| AOTVOKIR3DL9*01v2  | : | -----                                                                                           |   |       |   |       |   |       |   |       | : | -     |
| AOTVOKIR4DL9*02    | : | -----                                                                                           |   |       |   |       |   |       |   |       | : | -     |
| AOTVOKIR4DL10*01   | : | -----                                                                                           |   |       |   |       |   |       |   |       | : | -     |
| AOTVOKIR3DL10*01v1 | : | -----                                                                                           |   |       |   |       |   |       |   |       | : | -     |
| AOTVOKIR4DS10*01v2 | : | -----                                                                                           |   |       |   |       |   |       |   |       | : | -     |
| AOTVOKIR3DS10*01v3 | : | -----                                                                                           |   |       |   |       |   |       |   |       | : | -     |
| AOTVOKIR3DS10*01v4 | : | -----                                                                                           |   |       |   |       |   |       |   |       | : | -     |

|                   |   |                                                                                                  |   |       |   |       |   |       |   |        |   |       |
|-------------------|---|--------------------------------------------------------------------------------------------------|---|-------|---|-------|---|-------|---|--------|---|-------|
|                   | * | 10660                                                                                            | * | 10680 | * | 10700 | * | 10720 | * | EXON 6 |   |       |
| BAC_clone_Om      | : | CCTCAGAGATTTCCACTGAGTAGAAGACAGGCATCCTCATTGCCACACCTCTCTCCTGTCCCCTGTTCTAGGAAACCCCTTCAAGCGGTTGGCCAT |   |       |   |       |   |       |   |        | : | 10735 |
| AOTVOKIR3DL4*01   | : | -----                                                                                            |   |       |   |       |   |       |   |        | : | 970   |
| AOTVOKIR3DL4*02   | : | -----                                                                                            |   |       |   |       |   |       |   |        | : | 970   |
| AOTVOKIR3DL4*02v1 | : | -----                                                                                            |   |       |   |       |   |       |   |        | : | 934   |
| AOTVOKIR3DL4*02v2 | : | -----                                                                                            |   |       |   |       |   |       |   |        | : | 1054  |
| AOTVOKIR3DL4*03   | : | -----                                                                                            |   |       |   |       |   |       |   |        | : | 970   |
| AOTVOKIR3DS4*04   | : | -----                                                                                            |   |       |   |       |   |       |   |        | : | 970   |
| AOTVOKIR3DS4*04v1 | : | -----                                                                                            |   |       |   |       |   |       |   |        | : | 970   |
| AOTVOKIR3DS5*01   | : | -----                                                                                            |   |       |   |       |   |       |   |        | : | 970   |
| AOTVOKIR2DS5*01v1 | : | -----                                                                                            |   |       |   |       |   |       |   |        | : | 772   |
| AOTVOKIR2DS5*01v2 | : | -----                                                                                            |   |       |   |       |   |       |   |        | : | 685   |
| AOTVOKIR3DS7*01   | : | -----                                                                                            |   |       |   |       |   |       |   |        | : | 970   |
| AOTVOKIR3DS7*01v1 | : | CCTCAGAGATTTCCACTGAGTAGAAGACAGGCATCCTCATTGCCACACCTCTCTCCTGTCCCCTGTTCTAGGAAACCCCTTCAAGCGGTTGGCCAT |   |       |   |       |   |       |   |        | : | 1139  |
| AOTVOKIR3DL8*01   | : | -----                                                                                            |   |       |   |       |   |       |   |        | : | 970   |
| AOTVOKIR3DL8*01v1 | : | -----                                                                                            |   |       |   |       |   |       |   |        | : | -     |
| AOTVOKIR3DS8*01v2 | : | -----                                                                                            |   |       |   |       |   |       |   |        | : | 970   |

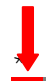

```

AOTVOKIR3DL8*02 : -----GAAACCC T TCAAGC AGTTGGCCAT : 970
AOTVOKIR4DL9*01 : -----GAAACCC T TCAAGC AGTTGGCCGT : 1255
AOTVOKIR4DS9*01v1 : ----- : -
AOTVOKIR3DL9*01v2 : -----GAAACCC T TCAAGC AGTTGGCCGT : 1057
AOTVOKIR4DL9*02 : -----GAAACCC T TCAAGC AGTTGGCCGT : 1255
AOTVOKIR4DL10*01 : -----GAAACCC T TCAAGC AGTTGGCCAT : 1255
AOTVOKIR3DL10*01v1 : -----GAAACCC T TCAAGC AGTTGGCCAT : 1054
AOTVOKIR4DS10*01v2 : -----GAAACCC T TCAAGC AGTTGGCCAT : 1255
AOTVOKIR3DS10*01v3 : -----GAAACCC T TCAAGC AGTTGGCCAT : 970
AOTVOKIR3DS10*01v4 : ----- : -

```

gaaaccc tcaagc gttggc t

```

10740 * 10760 * 10780 * 10800 * 10820 *
BAC_clone_Om : CACCCACTGAACCAAGCTCCAAAAGCTGTGAGTAAAGGACCCCTCTTCTCTCTGCTTTTGGAAACCTGGGGAGGTGGAAGCCTTGGATTCCAGTG : 10830
AOTVOKIR3DL4*01 : CACCCACTGAACCAAGCTCCAAAAGCT----- : 997
AOTVOKIR3DL4*02 : CACCCACTGAACCAAGCTCCAAAAGCT----- : 997
AOTVOKIR3DL4*02v1 : CACCCACTGAACCAAGCTCCAAAAGCT----- : 961
AOTVOKIR3DL4*02v2 : CACCCACTGAACCAAGCTCCAAAAGCT----- : 1081
AOTVOKIR3DL4*03 : CACCCACTGAACCAAGCTCCAAAAGCT----- : 997
AOTVOKIR3DS4*04 : CACCCACTGAACCAAGCTCCAAAAGCT----- : 997
AOTVOKIR3DS4*04v1 : CACCCACTGAACCAAGCTCCAAAAGCT----- : 997
AOTVOKIR3DS5*01 : CACCCACTGAACCAGGCTCCAAAAGCT----- : 997
AOTVOKIR2DS5*01v1 : CACCCACTGAACCAGGCTCCAAAAGCT----- : 799
AOTVOKIR2DS5*01v2 : CACCCACTGAACCAGGCTCCAAAAGCT----- : 712
AOTVOKIR3DS7*01 : CACCCACAGAACCAAGCTCCAAAAGCT----- : 997
AOTVOKIR3DS7*01v1 : CACCCACAGAACCAAGCTCCAAAAGCT----- : 1166
AOTVOKIR3DL8*01 : CACCCACTGAACCAGGCTCCAAAAGCT----- : 997
AOTVOKIR3DL8*01v1 : ----- : -
AOTVOKIR3DS8*01v2 : CACCCACTGAACCAGGCTCCAAAAGCT----- : 997
AOTVOKIR3DL8*02 : CACCCACTGAACCAGGCTCCAAAAGCT----- : 997
AOTVOKIR4DL9*01 : CACCCACGGAACCAAGCTCCAAAAGCT----- : 1282
AOTVOKIR4DS9*01v1 : ----- : -
AOTVOKIR3DL9*01v2 : CACCCACGGAACCAAGCTCCAAAAGCT----- : 1084
AOTVOKIR4DL9*02 : CACCCACGGAACCAAGCTCCAAAAGCT----- : 1282
AOTVOKIR4DL10*01 : CACCCACGGAACCAAGCTCCAAAAGCT----- : 1282
AOTVOKIR3DL10*01v1 : CACCCACGGAACCAAGCTCCAAAAGCT----- : 1081
AOTVOKIR4DS10*01v2 : CACCCACGGAACCAAGCTCCAAAAGCT----- : 1282
AOTVOKIR3DS10*01v3 : CACCCACGGAACCAAGCTCCAAAAGCT----- : 997
AOTVOKIR3DS10*01v4 : ----- : -
caccac gaacca gtcctcaaaaactg

```

```

10840 * 10860 * 10880 * 10900 * 10920
BAC_clone_Om : TTGGCTCAGCACCTCCCAGCTCTGTGATTGAGGGCCTGTCTTCTACCATCTCTGAACCC CAGACACTCCAACAGTGCAAGGGATCTGGGCCCAAC : 10925
AOTVOKIR3DL4*01 : ----- : -
AOTVOKIR3DL4*02 : ----- : -
AOTVOKIR3DL4*02v1 : ----- : -

```



```

AOTVOKIR3DL4*02v2 : ----- : -
AOTVOKIR3DL4*03   : ----- : -
AOTVOKIR3DS4*04   : ----- : -
AOTVOKIR3DS4*04v1 : ----- : -
AOTVOKIR3DS5*01   : ----- : -
AOTVOKIR2DS5*01v1 : ----- : -
AOTVOKIR2DS5*01v2 : ----- : -
AOTVOKIR3DS7*01   : ----- : -
AOTVOKIR3DS7*01v1 : ----- : -
AOTVOKIR3DL8*01   : ----- : -
AOTVOKIR3DL8*01v1 : ----- : -
AOTVOKIR3DS8*01v2 : ----- : -
AOTVOKIR3DL8*02   : ----- : -
AOTVOKIR4DL9*01   : ----- : -
AOTVOKIR4DS9*01v1 : ----- : -
AOTVOKIR3DL9*01v2 : ----- : -
AOTVOKIR4DL9*02   : ----- : -
AOTVOKIR4DL10*01  : ----- : -
AOTVOKIR3DL10*01v1 : ----- : -
AOTVOKIR4DS10*01v2 : ----- : -
AOTVOKIR3DS10*01v3 : ----- : -
AOTVOKIR3DS10*01v4 : ----- : -

```

```

          *      10940          *      10960          *      10980          *      11000          *      11020
BAC_clone_Om : ACGAGGCTCAGTGACGTCTCTTAATCTCTAATTTTCTGCAGCTGAGACCTCCTTGAGGCTAGAAGAATGATTGCAAATCTGACATCCTTCTCAGG : 11020
AOTVOKIR3DL4*01 : ----- : -
AOTVOKIR3DL4*02 : ----- : -
AOTVOKIR3DL4*02v1 : ----- : -
AOTVOKIR3DL4*02v2 : ----- : -
AOTVOKIR3DL4*03 : ----- : -
AOTVOKIR3DS4*04 : ----- : -
AOTVOKIR3DS4*04v1 : ----- : -
AOTVOKIR3DS5*01 : ----- : -
AOTVOKIR2DS5*01v1 : ----- : -
AOTVOKIR2DS5*01v2 : ----- : -
AOTVOKIR3DS7*01 : ----- : -
AOTVOKIR3DS7*01v1 : ----- : -
AOTVOKIR3DL8*01 : ----- : -
AOTVOKIR3DL8*01v1 : ----- : -
AOTVOKIR3DS8*01v2 : ----- : -
AOTVOKIR3DL8*02 : ----- : -
AOTVOKIR4DL9*01 : ----- : -
AOTVOKIR4DS9*01v1 : ----- : -
AOTVOKIR3DL9*01v2 : ----- : -
AOTVOKIR4DL9*02 : ----- : -

```

AOTVOKIR4DL10\*01 : ----- : -  
AOTVOKIR3DL10\*01v1 : ----- : -  
AOTVOKIR4DS10\*01v2 : ----- : -  
AOTVOKIR3DS10\*01v3 : ----- : -  
AOTVOKIR3DS10\*01v4 : ----- : -

\* 11040 \* 11060 \* 11080 \* 11100 \*  
BAC\_clone\_Om : AAAAAATGCAGTGTTTGTTCTGCCTGCATTCCCTAACTGGAGGATAAATGCCTGGGGGGCTTGGGGGAGGGAAAGGAAGGGAACATCTGATGAGGG : 11115  
AOTVOKIR3DL4\*01 : ----- : -  
AOTVOKIR3DL4\*02 : ----- : -  
AOTVOKIR3DL4\*02v1 : ----- : -  
AOTVOKIR3DL4\*02v2 : ----- : -  
AOTVOKIR3DL4\*03 : ----- : -  
AOTVOKIR3DS4\*04 : ----- : -  
AOTVOKIR3DS4\*04v1 : ----- : -  
AOTVOKIR3DS5\*01 : ----- : -  
AOTVOKIR2DS5\*01v1 : ----- : -  
AOTVOKIR2DS5\*01v2 : ----- : -  
AOTVOKIR3DS7\*01 : ----- : -  
AOTVOKIR3DS7\*01v1 : ----- : -  
AOTVOKIR3DL8\*01 : ----- : -  
AOTVOKIR3DL8\*01v1 : ----- : -  
AOTVOKIR3DS8\*01v2 : ----- : -  
AOTVOKIR3DL8\*02 : ----- : -  
AOTVOKIR4DL9\*01 : ----- : -  
AOTVOKIR4DS9\*01v1 : ----- : -  
AOTVOKIR3DL9\*01v2 : ----- : -  
AOTVOKIR4DL9\*02 : ----- : -  
AOTVOKIR4DL10\*01 : ----- : -  
AOTVOKIR3DL10\*01v1 : ----- : -  
AOTVOKIR4DS10\*01v2 : ----- : -  
AOTVOKIR3DS10\*01v3 : ----- : -  
AOTVOKIR3DS10\*01v4 : ----- : -

11120 \* 11140 \* 11160 \* 11180 \* 11200 \*  
BAC\_clone\_Om : TGGGGCATTTTAGAGAAGTTCCACTTGCCAAGGAATTAGCTCCTGTCCCTCATGATGCAACACTGGCTGACTCAGCAGAGCAAGAGCTTTGCAGT : 11210  
AOTVOKIR3DL4\*01 : ----- : -  
AOTVOKIR3DL4\*02 : ----- : -  
AOTVOKIR3DL4\*02v1 : ----- : -  
AOTVOKIR3DL4\*02v2 : ----- : -  
AOTVOKIR3DL4\*03 : ----- : -  
AOTVOKIR3DS4\*04 : ----- : -  
AOTVOKIR3DS4\*04v1 : ----- : -  
AOTVOKIR3DS5\*01 : ----- : -

```

AOTVOKIR2DS5*01v1 : ----- : -
AOTVOKIR2DS5*01v2 : ----- : -
AOTVOKIR3DS7*01   : ----- : -
AOTVOKIR3DS7*01v1 : ----- : -
AOTVOKIR3DL8*01   : ----- : -
AOTVOKIR3DL8*01v1 : ----- : -
AOTVOKIR3DS8*01v2 : ----- : -
AOTVOKIR3DL8*02   : ----- : -
AOTVOKIR4DL9*01   : ----- : -
AOTVOKIR4DS9*01v1 : ----- : -
AOTVOKIR3DL9*01v2 : ----- : -
AOTVOKIR4DL9*02   : ----- : -
AOTVOKIR4DL10*01  : ----- : -
AOTVOKIR3DL10*01v1 : ----- : -
AOTVOKIR4DS10*01v2 : ----- : -
AOTVOKIR3DS10*01v3 : ----- : -
AOTVOKIR3DS10*01v4 : ----- : -

```

```

                11220      *      11240      *      11260      *      11280      *      11300
BAC_clone Om    : AAGAGAGAACCGAGCTCACGCATGCGCACTTTGACTGGATCACTCATTTCGACCCAACCACTCACTGCAGCCTCCGCCTCCTCAGTTGAAGCAGGA : 11305
AOTVOKIR3DL4*01 : ----- : -
AOTVOKIR3DL4*02 : ----- : -
AOTVOKIR3DL4*02v1 : ----- : -
AOTVOKIR3DL4*02v2 : ----- : -
AOTVOKIR3DL4*03 : ----- : -
AOTVOKIR3DS4*04 : ----- : -
AOTVOKIR3DS4*04v1 : ----- : -
AOTVOKIR3DS5*01 : ----- : -
AOTVOKIR2DS5*01v1 : ----- : -
AOTVOKIR2DS5*01v2 : ----- : -
AOTVOKIR3DS7*01 : ----- : -
AOTVOKIR3DS7*01v1 : ----- : -
AOTVOKIR3DL8*01 : ----- : -
AOTVOKIR3DL8*01v1 : ----- : -
AOTVOKIR3DS8*01v2 : ----- : -
AOTVOKIR3DL8*02 : ----- : -
AOTVOKIR4DL9*01 : ----- : -
AOTVOKIR4DS9*01v1 : ----- : -
AOTVOKIR3DL9*01v2 : ----- : -
AOTVOKIR4DL9*02 : ----- : -
AOTVOKIR4DL10*01 : ----- : -
AOTVOKIR3DL10*01v1 : ----- : -
AOTVOKIR4DS10*01v2 : ----- : -
AOTVOKIR3DS10*01v3 : ----- : -
AOTVOKIR3DS10*01v4 : ----- : -

```

```

*      11320      *      11340      *      11360      *      11380      *      11400
BAC_clone_Om      : GAATGACTTCAACCCAGGAGGCGGAGGTTGCAGTGAGCCGAGATCACACCACTGCCTCCAGCCTGGGCGACACAGGGAGGCTCCATTTCCAAAA : 11400
AOTVOKIR3DL4*01  : ----- : -
AOTVOKIR3DL4*02  : ----- : -
AOTVOKIR3DL4*02v1 : ----- : -
AOTVOKIR3DL4*02v2 : ----- : -
AOTVOKIR3DL4*03  : ----- : -
AOTVOKIR3DS4*04  : ----- : -
AOTVOKIR3DS4*04v1 : ----- : -
AOTVOKIR3DS5*01  : ----- : -
AOTVOKIR2DS5*01v1 : ----- : -
AOTVOKIR2DS5*01v2 : ----- : -
AOTVOKIR3DS7*01  : ----- : -
AOTVOKIR3DS7*01v1 : ----- : -
AOTVOKIR3DL8*01  : ----- : -
AOTVOKIR3DL8*01v1 : ----- : -
AOTVOKIR3DS8*01v2 : ----- : -
AOTVOKIR3DL8*02  : ----- : -
AOTVOKIR4DL9*01  : ----- : -
AOTVOKIR4DS9*01v1 : ----- : -
AOTVOKIR3DL9*01v2 : ----- : -
AOTVOKIR4DL9*02  : ----- : -
AOTVOKIR4DL10*01 : ----- : -
AOTVOKIR3DL10*01v1 : ----- : -
AOTVOKIR4DS10*01v2 : ----- : -
AOTVOKIR3DS10*01v3 : ----- : -
AOTVOKIR3DS10*01v4 : ----- : -

```

```

*      11420      *      11440      *      11460      *      11480      *
BAC_clone_Om      : TTAAAATTA AAAACTACGTAAATGTTCTATAACACACACGAATGACAGAGGCACCTGATTCCAATCATCATTTTTTCTACTTCTCCATAATTACTT : 11495
AOTVOKIR3DL4*01  : ----- : -
AOTVOKIR3DL4*02  : ----- : -
AOTVOKIR3DL4*02v1 : ----- : -
AOTVOKIR3DL4*02v2 : ----- : -
AOTVOKIR3DL4*03  : ----- : -
AOTVOKIR3DS4*04  : ----- : -
AOTVOKIR3DS4*04v1 : ----- : -
AOTVOKIR3DS5*01  : ----- : -
AOTVOKIR2DS5*01v1 : ----- : -
AOTVOKIR2DS5*01v2 : ----- : -
AOTVOKIR3DS7*01  : ----- : -
AOTVOKIR3DS7*01v1 : ----- : -
AOTVOKIR3DL8*01  : ----- : -

```

AOTVOKIR3DL8\*01v1 : ----- : -  
AOTVOKIR3DS8\*01v2 : ----- : -  
AOTVOKIR3DL8\*02 : ----- : -  
AOTVOKIR4DL9\*01 : ----- : -  
AOTVOKIR4DS9\*01v1 : ----- : -  
AOTVOKIR3DL9\*01v2 : ----- : -  
AOTVOKIR4DL9\*02 : ----- : -  
AOTVOKIR4DL10\*01 : ----- : -  
AOTVOKIR3DL10\*01v1 : ----- : -  
AOTVOKIR4DS10\*01v2 : ----- : -  
AOTVOKIR3DS10\*01v3 : ----- : -  
AOTVOKIR3DS10\*01v4 : ----- : -

11500 \* 11520 \* 11540 \* 11560 \* 11580 \*  
BAC\_clone\_Om : TTTTGATCCTTACTCTTATCGATTAGAAAATCAGCCTAGAACCTCTTCCCTATTTGGCTTTCTGTCACCATGAGAGCATATGGAAAATGGGAAAG : 11590  
AOTVOKIR3DL4\*01 : ----- : -  
AOTVOKIR3DL4\*02 : ----- : -  
AOTVOKIR3DL4\*02v1 : ----- : -  
AOTVOKIR3DL4\*02v2 : ----- : -  
AOTVOKIR3DL4\*03 : ----- : -  
AOTVOKIR3DS4\*04 : ----- : -  
AOTVOKIR3DS4\*04v1 : ----- : -  
AOTVOKIR3DS5\*01 : ----- : -  
AOTVOKIR2DS5\*01v1 : ----- : -  
AOTVOKIR2DS5\*01v2 : ----- : -  
AOTVOKIR3DS7\*01 : ----- : -  
AOTVOKIR3DS7\*01v1 : ----- : -  
AOTVOKIR3DL8\*01 : ----- : -  
AOTVOKIR3DL8\*01v1 : ----- : -  
AOTVOKIR3DS8\*01v2 : ----- : -  
AOTVOKIR3DL8\*02 : ----- : -  
AOTVOKIR4DL9\*01 : ----- : -  
AOTVOKIR4DS9\*01v1 : ----- : -  
AOTVOKIR3DL9\*01v2 : ----- : -  
AOTVOKIR4DL9\*02 : ----- : -  
AOTVOKIR4DL10\*01 : ----- : -  
AOTVOKIR3DL10\*01v1 : ----- : -  
AOTVOKIR4DS10\*01v2 : ----- : -  
AOTVOKIR3DS10\*01v3 : ----- : -  
AOTVOKIR3DS10\*01v4 : ----- : -

11600 \* 11620 \* 11640 \* 11660 \* 11680 \*  
BAC\_clone\_Om : CCCTCAACCCAGCAGCACAGGTCCTGAAATAGAGGAAGTGCTCTCTTCATGGCATAAAAGTTGCCCCCTCACCCAGATCCCCACCTCACCCCTA : 11685  
AOTVOKIR3DL4\*01 : ----- : -

```

AOTVOKIR3DL4*02      : ----- : -
AOTVOKIR3DL4*02v1   : ----- : -
AOTVOKIR3DL4*02v2   : ----- : -
AOTVOKIR3DL4*03     : ----- : -
AOTVOKIR3DS4*04     : ----- : -
AOTVOKIR3DS4*04v1   : ----- : -
AOTVOKIR3DS5*01     : ----- : -
AOTVOKIR2DS5*01v1   : ----- : -
AOTVOKIR2DS5*01v2   : ----- : -
AOTVOKIR3DS7*01     : ----- : -
AOTVOKIR3DS7*01v1   : ----- : -
AOTVOKIR3DL8*01     : ----- : -
AOTVOKIR3DL8*01v1   : ----- : -
AOTVOKIR3DS8*01v2   : ----- : -
AOTVOKIR3DL8*02     : ----- : -
AOTVOKIR4DL9*01     : ----- : -
AOTVOKIR4DS9*01v1   : ----- : -
AOTVOKIR3DL9*01v2   : ----- : -
AOTVOKIR4DL9*02     : ----- : -
AOTVOKIR4DL10*01    : ----- : -
AOTVOKIR3DL10*01v1  : ----- : -
AOTVOKIR4DS10*01v2  : ----- : -
AOTVOKIR3DS10*01v3  : ----- : -
AOTVOKIR3DS10*01v4  : ----- : -

```

```

          *      11700          *      11720          *      11740          *      11760          *      11780
BAC_clone_Om      : CTTCCAATCACGTGTGGAGATACAGATAGATTATGGGGAGGTCAAACCTAATATTCTTTGGAGTGACCTCAGTTCTTGGACTCAGAGACCAATGC : 11780
AOTVOKIR3DL4*01   : ----- : -
AOTVOKIR3DL4*02   : ----- : -
AOTVOKIR3DL4*02v1 : ----- : -
AOTVOKIR3DL4*02v2 : ----- : -
AOTVOKIR3DL4*03   : ----- : -
AOTVOKIR3DS4*04   : ----- : -
AOTVOKIR3DS4*04v1 : ----- : -
AOTVOKIR3DS5*01   : ----- : -
AOTVOKIR2DS5*01v1 : ----- : -
AOTVOKIR2DS5*01v2 : ----- : -
AOTVOKIR3DS7*01   : ----- : -
AOTVOKIR3DS7*01v1 : ----- : -
AOTVOKIR3DL8*01   : ----- : -
AOTVOKIR3DL8*01v1 : ----- : -
AOTVOKIR3DS8*01v2 : ----- : -
AOTVOKIR3DL8*02   : ----- : -
AOTVOKIR4DL9*01   : ----- : -
AOTVOKIR4DS9*01v1 : ----- : -

```

AOTVOKIR3DL9\*01v2 : ----- : -  
AOTVOKIR4DL9\*02 : ----- : -  
AOTVOKIR4DL10\*01 : ----- : -  
AOTVOKIR3DL10\*01v1 : ----- : -  
AOTVOKIR4DS10\*01v2 : ----- : -  
AOTVOKIR3DS10\*01v3 : ----- : -  
AOTVOKIR3DS10\*01v4 : ----- : -

                  \*      11800                  \*      11820                  \*      11840                  \*      11860                  \*  
BAC\_clone\_Om      : CAGCACTATCTCCTGGTCCCCTTTTCTACTAATTCACAGAAGGACAGGCTGTATTTTGAAGCAATAGATGATGGAGGGCGGGGTAGAACAGCAGCC : 11875  
AOTVOKIR3DL4\*01   : ----- : -  
AOTVOKIR3DL4\*02   : ----- : -  
AOTVOKIR3DL4\*02v1 : ----- : -  
AOTVOKIR3DL4\*02v2 : ----- : -  
AOTVOKIR3DL4\*03   : ----- : -  
AOTVOKIR3DS4\*04   : ----- : -  
AOTVOKIR3DS4\*04v1 : ----- : -  
AOTVOKIR3DS5\*01   : ----- : -  
AOTVOKIR2DS5\*01v1 : ----- : -  
AOTVOKIR2DS5\*01v2 : ----- : -  
AOTVOKIR3DS7\*01   : ----- : -  
AOTVOKIR3DS7\*01v1 : ----- : -  
AOTVOKIR3DL8\*01   : ----- : -  
AOTVOKIR3DL8\*01v1 : ----- : -  
AOTVOKIR3DS8\*01v2 : ----- : -  
AOTVOKIR3DL8\*02   : ----- : -  
AOTVOKIR4DL9\*01   : ----- : -  
AOTVOKIR4DS9\*01v1 : ----- : -  
AOTVOKIR3DL9\*01v2 : ----- : -  
AOTVOKIR4DL9\*02   : ----- : -  
AOTVOKIR4DL10\*01  : ----- : -  
AOTVOKIR3DL10\*01v1 : ----- : -  
AOTVOKIR4DS10\*01v2 : ----- : -  
AOTVOKIR3DS10\*01v3 : ----- : -  
AOTVOKIR3DS10\*01v4 : ----- : -

                  11880                  \*      11900                  \*      11920                  \*      11940                  \*      11960                  \*  
BAC\_clone\_Om      : TATTACACGTCTCACGAGATCACAAAAAGTAACACGTTGCCACGGGCTTCTGCACTATTTTCTGGCTGTTTGTATGTAAGACATTCTACTTCACT : 11970  
AOTVOKIR3DL4\*01   : ----- : -  
AOTVOKIR3DL4\*02   : ----- : -  
AOTVOKIR3DL4\*02v1 : ----- : -  
AOTVOKIR3DL4\*02v2 : ----- : -  
AOTVOKIR3DL4\*03   : ----- : -  
AOTVOKIR3DS4\*04   : ----- : -

```

AOTVOKIR3DS4*04v1 : ----- : -
AOTVOKIR3DS5*01   : ----- : -
AOTVOKIR2DS5*01v1 : ----- : -
AOTVOKIR2DS5*01v2 : ----- : -
AOTVOKIR3DS7*01   : ----- : -
AOTVOKIR3DS7*01v1 : ----- : -
AOTVOKIR3DL8*01   : ----- : -
AOTVOKIR3DL8*01v1 : ----- : -
AOTVOKIR3DS8*01v2 : ----- : -
AOTVOKIR3DL8*02   : ----- : -
AOTVOKIR4DL9*01   : ----- : -
AOTVOKIR4DS9*01v1 : ----- : -
AOTVOKIR3DL9*01v2 : ----- : -
AOTVOKIR4DL9*02   : ----- : -
AOTVOKIR4DL10*01  : ----- : -
AOTVOKIR3DL10*01v1 : ----- : -
AOTVOKIR4DS10*01v2 : ----- : -
AOTVOKIR3DS10*01v3 : ----- : -
AOTVOKIR3DS10*01v4 : ----- : -

```

```

                11980          *          12000          *          12020          *          12040          *          12060
BAC_clone_Om    : TCTTTTCGATTTTCGATTCCACTTTTTTTTCTTTTCTTGGAGAACGTAATTTGTTTTGAGTCAAGAGTGTTGTGGATGCAGACGTTGTAAAGCACAT : 12065
AOTVOKIR3DL4*01 : ----- : -
AOTVOKIR3DL4*02 : ----- : -
AOTVOKIR3DL4*02v1 : ----- : -
AOTVOKIR3DL4*02v2 : ----- : -
AOTVOKIR3DL4*03 : ----- : -
AOTVOKIR3DS4*04 : ----- : -
AOTVOKIR3DS4*04v1 : ----- : -
AOTVOKIR3DS5*01 : ----- : -
AOTVOKIR2DS5*01v1 : ----- : -
AOTVOKIR2DS5*01v2 : ----- : -
AOTVOKIR3DS7*01 : ----- : -
AOTVOKIR3DS7*01v1 : ----- : -
AOTVOKIR3DL8*01 : ----- : -
AOTVOKIR3DL8*01v1 : ----- : -
AOTVOKIR3DS8*01v2 : ----- : -
AOTVOKIR3DL8*02 : ----- : -
AOTVOKIR4DL9*01 : ----- : -
AOTVOKIR4DS9*01v1 : ----- : -
AOTVOKIR3DL9*01v2 : ----- : -
AOTVOKIR4DL9*02 : ----- : -
AOTVOKIR4DL10*01 : ----- : -
AOTVOKIR3DL10*01v1 : ----- : -
AOTVOKIR4DS10*01v2 : ----- : -

```



AOTVOKIR3DS10\*01v3 : ----- : -  
AOTVOKIR3DS10\*01v4 : ----- : -

\* 12080 \* 12100 \* 12120 \* 12140 \* 12160  
BAC\_clone\_Om : TCGCTGTGTATCAATCCCAGTCCGGTCTTCCTAGAGAAGACTCTGAACTCCTCCTGACTGCACCTGGGGCTATGCCAGTTTCTATCACTGACAGT : 12160  
AOTVOKIR3DL4\*01 : ----- : -  
AOTVOKIR3DL4\*02 : ----- : -  
AOTVOKIR3DL4\*02v1 : ----- : -  
AOTVOKIR3DL4\*02v2 : ----- : -  
AOTVOKIR3DL4\*03 : ----- : -  
AOTVOKIR3DS4\*04 : ----- : -  
AOTVOKIR3DS4\*04v1 : ----- : -  
AOTVOKIR3DS5\*01 : ----- : -  
AOTVOKIR2DS5\*01v1 : ----- : -  
AOTVOKIR2DS5\*01v2 : ----- : -  
AOTVOKIR3DS7\*01 : ----- : -  
AOTVOKIR3DS7\*01v1 : ----- : -  
AOTVOKIR3DL8\*01 : ----- : -  
AOTVOKIR3DL8\*01v1 : ----- : -  
AOTVOKIR3DS8\*01v2 : ----- : -  
AOTVOKIR3DL8\*02 : ----- : -  
AOTVOKIR4DL9\*01 : ----- : -  
AOTVOKIR4DS9\*01v1 : ----- : -  
AOTVOKIR3DL9\*01v2 : ----- : -  
AOTVOKIR4DL9\*02 : ----- : -  
AOTVOKIR4DL10\*01 : ----- : -  
AOTVOKIR3DL10\*01v1 : ----- : -  
AOTVOKIR4DS10\*01v2 : ----- : -  
AOTVOKIR3DS10\*01v3 : ----- : -  
AOTVOKIR3DS10\*01v4 : ----- : -

\* 12180 \* 12200 \* 12220 \* 12240 \*  
BAC\_clone\_Om : CACTCCAGGGAGACAGAACACAGACAGAATAAATTACATAAAGCAGGTTTCATGGGGCCGGGTGCGGTGGCTCACGCCTGTAATCCCAGCACTTTG : 12255  
AOTVOKIR3DL4\*01 : ----- : -  
AOTVOKIR3DL4\*02 : ----- : -  
AOTVOKIR3DL4\*02v1 : ----- : -  
AOTVOKIR3DL4\*02v2 : ----- : -  
AOTVOKIR3DL4\*03 : ----- : -  
AOTVOKIR3DS4\*04 : ----- : -  
AOTVOKIR3DS4\*04v1 : ----- : -  
AOTVOKIR3DS5\*01 : ----- : -  
AOTVOKIR2DS5\*01v1 : ----- : -  
AOTVOKIR2DS5\*01v2 : ----- : -  
AOTVOKIR3DS7\*01 : ----- : -

```

AOTVOKIR3DS7*01v1 : ----- : -
AOTVOKIR3DL8*01   : ----- : -
AOTVOKIR3DL8*01v1 : ----- : -
AOTVOKIR3DS8*01v2 : ----- : -
AOTVOKIR3DL8*02   : ----- : -
AOTVOKIR4DL9*01   : ----- : -
AOTVOKIR4DS9*01v1 : ----- : -
AOTVOKIR3DL9*01v2 : ----- : -
AOTVOKIR4DL9*02   : ----- : -
AOTVOKIR4DL10*01  : ----- : -
AOTVOKIR3DL10*01v1 : ----- : -
AOTVOKIR4DS10*01v2 : ----- : -
AOTVOKIR3DS10*01v3 : ----- : -
AOTVOKIR3DS10*01v4 : ----- : -

```

```

          12260      *      12280      *      12300      *      12320      *      12340      *
BAC_clone_Om : GGAAGCCGAGGCGGGTGGATCATGAGGTCAAGAGATCGAGACCATCCTGGTCAACATGGTCAAACCCCATCTCTACTAAAAATACAAAATATTAG : 12350
AOTVOKIR3DL4*01 : ----- : -
AOTVOKIR3DL4*02 : ----- : -
AOTVOKIR3DL4*02v1 : ----- : -
AOTVOKIR3DL4*02v2 : ----- : -
AOTVOKIR3DL4*03 : ----- : -
AOTVOKIR3DS4*04 : ----- : -
AOTVOKIR3DS4*04v1 : ----- : -
AOTVOKIR3DS5*01 : ----- : -
AOTVOKIR2DS5*01v1 : ----- : -
AOTVOKIR2DS5*01v2 : ----- : -
AOTVOKIR3DS7*01 : ----- : -
AOTVOKIR3DS7*01v1 : ----- : -
AOTVOKIR3DL8*01 : ----- : -
AOTVOKIR3DL8*01v1 : ----- : -
AOTVOKIR3DS8*01v2 : ----- : -
AOTVOKIR3DL8*02 : ----- : -
AOTVOKIR4DL9*01 : ----- : -
AOTVOKIR4DS9*01v1 : ----- : -
AOTVOKIR3DL9*01v2 : ----- : -
AOTVOKIR4DL9*02 : ----- : -
AOTVOKIR4DL10*01 : ----- : -
AOTVOKIR3DL10*01v1 : ----- : -
AOTVOKIR4DS10*01v2 : ----- : -
AOTVOKIR3DS10*01v3 : ----- : -
AOTVOKIR3DS10*01v4 : ----- : -

```

```

          12360      *      12380      *      12400      *      12420      *      12440

```

```

BAC_clone_Om      : CTGGGCACGGTGGCACGTGCCTGTAATCCCAGCTACTCTGGAGGCTGAGGCAGGAGAATTGCCTGAACCCAGGAGGCGGAGGTTGCGGTGAGCCG : 12445
AOTVOKIR3DL4*01  : ----- : -
AOTVOKIR3DL4*02  : ----- : -
AOTVOKIR3DL4*02v1 : ----- : -
AOTVOKIR3DL4*02v2 : ----- : -
AOTVOKIR3DL4*03  : ----- : -
AOTVOKIR3DS4*04  : ----- : -
AOTVOKIR3DS4*04v1 : ----- : -
AOTVOKIR3DS5*01  : ----- : -
AOTVOKIR2DS5*01v1 : ----- : -
AOTVOKIR2DS5*01v2 : ----- : -
AOTVOKIR3DS7*01  : ----- : -
AOTVOKIR3DS7*01v1 : ----- : -
AOTVOKIR3DL8*01  : ----- : -
AOTVOKIR3DL8*01v1 : ----- : -
AOTVOKIR3DS8*01v2 : ----- : -
AOTVOKIR3DL8*02  : ----- : -
AOTVOKIR4DL9*01  : ----- : -
AOTVOKIR4DS9*01v1 : ----- : -
AOTVOKIR3DL9*01v2 : ----- : -
AOTVOKIR4DL9*02  : ----- : -
AOTVOKIR4DL10*01 : ----- : -
AOTVOKIR3DL10*01v1 : ----- : -
AOTVOKIR4DS10*01v2 : ----- : -
AOTVOKIR3DS10*01v3 : ----- : -
AOTVOKIR3DS10*01v4 : ----- : -

```

```

*      12460      *      12480      *      12500      *      12520      *      12540
BAC_clone_Om      : AGATCGTGCCATTGCTCTCCAGCCTGGGTAACAACAGCGAAACTCCGTCTCAAAAAAAAAAAAAAAAAAGAAAGAAAGAAAAAGCAGGTTTATTATTC : 12540
AOTVOKIR3DL4*01  : ----- : -
AOTVOKIR3DL4*02  : ----- : -
AOTVOKIR3DL4*02v1 : ----- : -
AOTVOKIR3DL4*02v2 : ----- : -
AOTVOKIR3DL4*03  : ----- : -
AOTVOKIR3DS4*04  : ----- : -
AOTVOKIR3DS4*04v1 : ----- : -
AOTVOKIR3DS5*01  : ----- : -
AOTVOKIR2DS5*01v1 : ----- : -
AOTVOKIR2DS5*01v2 : ----- : -
AOTVOKIR3DS7*01  : ----- : -
AOTVOKIR3DS7*01v1 : ----- : -
AOTVOKIR3DL8*01  : ----- : -
AOTVOKIR3DL8*01v1 : ----- : -
AOTVOKIR3DS8*01v2 : ----- : -
AOTVOKIR3DL8*02  : ----- : -

```

```

AOTVOKIR4DL9*01      : ----- : -
AOTVOKIR4DS9*01v1   : ----- : -
AOTVOKIR3DL9*01v2   : ----- : -
AOTVOKIR4DL9*02     : ----- : -
AOTVOKIR4DL10*01    : ----- : -
AOTVOKIR3DL10*01v1  : ----- : -
AOTVOKIR4DS10*01v2  : ----- : -
AOTVOKIR3DS10*01v3  : ----- : -
AOTVOKIR3DS10*01v4  : ----- : -

```

```

                *      12560          *      12580          *      12600          *      12620          *
BAC_clone_Om      : CAGATCAGTAGCAAGTGTATGGCAGAAGCCTACCTTTCAGGGTGAGCCAGTCCCCCGAGGCTCAGAAAAGCGGCCACGAAACACAGAGCCACCCC : 12635
AOTVOKIR3DL4*01   : ----- : -
AOTVOKIR3DL4*02   : ----- : -
AOTVOKIR3DL4*02v1 : ----- : -
AOTVOKIR3DL4*02v2 : ----- : -
AOTVOKIR3DL4*03   : ----- : -
AOTVOKIR3DS4*04   : ----- : -
AOTVOKIR3DS4*04v1 : ----- : -
AOTVOKIR3DS5*01   : ----- : -
AOTVOKIR2DS5*01v1 : ----- : -
AOTVOKIR2DS5*01v2 : ----- : -
AOTVOKIR3DS7*01   : ----- : -
AOTVOKIR3DS7*01v1 : ----- : -
AOTVOKIR3DL8*01   : ----- : -
AOTVOKIR3DL8*01v1 : ----- : -
AOTVOKIR3DS8*01v2 : ----- : -
AOTVOKIR3DL8*02   : ----- : -
AOTVOKIR4DL9*01   : ----- : -
AOTVOKIR4DS9*01v1 : ----- : -
AOTVOKIR3DL9*01v2 : ----- : -
AOTVOKIR4DL9*02   : ----- : -
AOTVOKIR4DL10*01  : ----- : -
AOTVOKIR3DL10*01v1 : ----- : -
AOTVOKIR4DS10*01v2 : ----- : -
AOTVOKIR3DS10*01v3 : ----- : -
AOTVOKIR3DS10*01v4 : ----- : -

```

```

                12640          *      12660          *      12680          *      12700          *      12720          *
BAC_clone_Om      : ATATGCAGTGTAGCTGGGGGAAGTGAAGAGCAGCCCTGCCTGAGCTTTGCACCCTGGAGCCACAGGAAGCGCTGAGTTAAAGCCCTGCCTCACAC : 12730
AOTVOKIR3DL4*01   : ----- : -
AOTVOKIR3DL4*02   : ----- : -
AOTVOKIR3DL4*02v1 : ----- : -
AOTVOKIR3DL4*02v2 : ----- : -

```

```

AOTVOKIR3DL4*03 : ----- : -
AOTVOKIR3DS4*04 : ----- : -
AOTVOKIR3DS4*04v1 : ----- : -
AOTVOKIR3DS5*01 : ----- : -
AOTVOKIR2DS5*01v1 : ----- : -
AOTVOKIR2DS5*01v2 : ----- : -
AOTVOKIR3DS7*01 : ----- : -
AOTVOKIR3DS7*01v1 : ----- : -
AOTVOKIR3DL8*01 : ----- : -
AOTVOKIR3DL8*01v1 : ----- : -
AOTVOKIR3DS8*01v2 : ----- : -
AOTVOKIR3DL8*02 : ----- : -
AOTVOKIR4DL9*01 : ----- : -
AOTVOKIR4DS9*01v1 : ----- : -
AOTVOKIR3DL9*01v2 : ----- : -
AOTVOKIR4DL9*02 : ----- : -
AOTVOKIR4DL10*01 : ----- : -
AOTVOKIR3DL10*01v1 : ----- : -
AOTVOKIR4DS10*01v2 : ----- : -
AOTVOKIR3DS10*01v3 : ----- : -
AOTVOKIR3DS10*01v4 : ----- : -

```

```

                12740          *      12760          *      12780          *      12800          *      12820
BAC_clone_Om : CCTCCTCTAGGAAGAGCAGGAGAGAGCCCAGGCTGTTCTGGGACGTTCCCTCCTGATCTCAGGACGTTGCTGTCTTAGTCCGATTTTGTGCTATC : 12825
AOTVOKIR3DL4*01 : ----- : -
AOTVOKIR3DL4*02 : ----- : -
AOTVOKIR3DL4*02v1 : ----- : -
AOTVOKIR3DL4*02v2 : ----- : -
AOTVOKIR3DL4*03 : ----- : -
AOTVOKIR3DS4*04 : ----- : -
AOTVOKIR3DS4*04v1 : ----- : -
AOTVOKIR3DS5*01 : ----- : -
AOTVOKIR2DS5*01v1 : ----- : -
AOTVOKIR2DS5*01v2 : ----- : -
AOTVOKIR3DS7*01 : ----- : -
AOTVOKIR3DS7*01v1 : ----- : -
AOTVOKIR3DL8*01 : ----- : -
AOTVOKIR3DL8*01v1 : ----- : -
AOTVOKIR3DS8*01v2 : ----- : -
AOTVOKIR3DL8*02 : ----- : -
AOTVOKIR4DL9*01 : ----- : -
AOTVOKIR4DS9*01v1 : ----- : -
AOTVOKIR3DL9*01v2 : ----- : -
AOTVOKIR4DL9*02 : ----- : -
AOTVOKIR4DL10*01 : ----- : -

```

AOTVOKIR3DL10\*01v1 : ----- : -  
AOTVOKIR4DS10\*01v2 : ----- : -  
AOTVOKIR3DS10\*01v3 : ----- : -  
AOTVOKIR3DS10\*01v4 : ----- : -

\* 12840 \* 12860 \* 12880 \* 12900 \* 12920  
BAC\_clone\_Om : AGGGAACACCTGAGCCTGGGTAACCTTCTAAAGAAAACAGATATGTTTGGCTCACGGTTCCACAGGCTGTACTAGAAGCATGGCACCAGCATCTAT : 12920  
AOTVOKIR3DL4\*01 : ----- : -  
AOTVOKIR3DL4\*02 : ----- : -  
AOTVOKIR3DL4\*02v1 : ----- : -  
AOTVOKIR3DL4\*02v2 : ----- : -  
AOTVOKIR3DL4\*03 : ----- : -  
AOTVOKIR3DS4\*04 : ----- : -  
AOTVOKIR3DS4\*04v1 : ----- : -  
AOTVOKIR3DS5\*01 : ----- : -  
AOTVOKIR2DS5\*01v1 : ----- : -  
AOTVOKIR2DS5\*01v2 : ----- : -  
AOTVOKIR3DS7\*01 : ----- : -  
AOTVOKIR3DS7\*01v1 : ----- : -  
AOTVOKIR3DL8\*01 : ----- : -  
AOTVOKIR3DL8\*01v1 : ----- : -  
AOTVOKIR3DS8\*01v2 : ----- : -  
AOTVOKIR3DL8\*02 : ----- : -  
AOTVOKIR4DL9\*01 : ----- : -  
AOTVOKIR4DS9\*01v1 : ----- : -  
AOTVOKIR3DL9\*01v2 : ----- : -  
AOTVOKIR4DL9\*02 : ----- : -  
AOTVOKIR4DL10\*01 : ----- : -  
AOTVOKIR3DL10\*01v1 : ----- : -  
AOTVOKIR4DS10\*01v2 : ----- : -  
AOTVOKIR3DS10\*01v3 : ----- : -  
AOTVOKIR3DS10\*01v4 : ----- : -

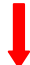

\* 12940 \* 12960 \* 12980 \* 13000 \*  
BAC\_clone\_Om : TTCTTGATGACCTGAGGCCGCTTTCCTCTGGCAGAAGGAAGGGGGCCTGTGTGTGCAGAGACCACAGAGATCACACA--GCAAGAGACGGAG : 13013  
AOTVOKIR3DL4\*01 : ----- : -  
AOTVOKIR3DL4\*02 : ----- : -  
AOTVOKIR3DL4\*02v1 : ----- : -  
AOTVOKIR3DL4\*02v2 : ----- : -  
AOTVOKIR3DL4\*03 : ----- : -  
AOTVOKIR3DS4\*04 : ----- : -  
AOTVOKIR3DS4\*04v1 : -----GCTGCTCCCCTCTGGCAGAAGAGAAGTGGAGTGTGTGTGTGCAGAGACCACAGAGATCACACAGCAAGAGAGGGAG : 1074  
AOTVOKIR3DS5\*01 : ----- : -  
AOTVOKIR2DS5\*01v1 : ----- : -

```

AOTVOKIR2DS5*01v2 : ----- : -
AOTVOKIR3DS7*01   : ----- : -
AOTVOKIR3DS7*01v1 : ----- : -
AOTVOKIR3DL8*01   : ----- : -
AOTVOKIR3DL8*01v1 : ----- : -
AOTVOKIR3DS8*01v2 : ----- : -
AOTVOKIR3DL8*02   : ----- : -
AOTVOKIR4DL9*01   : ----- : -
AOTVOKIR4DS9*01v1 : ----- : -
AOTVOKIR3DL9*01v2 : ----- : -
AOTVOKIR4DL9*02   : ----- : -
AOTVOKIR4DL10*01  : ----- : -
AOTVOKIR3DL10*01v1 : ----- : -
AOTVOKIR4DS10*01v2 : ----- : -
AOTVOKIR3DS10*01v3 : ----- : -
AOTVOKIR3DS10*01v4 : ----- : -

```

```

          13020          *          13040          *          13060          *          13080          *          13100          *
BAC_clone_Om : CAGGAGGCGGAGGTGCGATGGAGCTTCCAAGTTCTCCTTCACAACCAACTCTCCAGGAAGTAATAGAGGGAAAACCTTGCTAACCCCGTCTCATGG : 13108
AOTVOKIR3DL4*01 : ----- : -
AOTVOKIR3DL4*02 : ----- : -
AOTVOKIR3DL4*02v1 : ----- : -
AOTVOKIR3DL4*02v2 : ----- : -
AOTVOKIR3DL4*03 : ----- : -
AOTVOKIR3DS4*04 : ----- : -
AOTVOKIR3DS4*04v1 : CGGGAGGCGGAG----- : 1086
AOTVOKIR3DS5*01 : ----- : -
AOTVOKIR2DS5*01v1 : ----- : -
AOTVOKIR2DS5*01v2 : ----- : -
AOTVOKIR3DS7*01 : ----- : -
AOTVOKIR3DS7*01v1 : ----- : -
AOTVOKIR3DL8*01 : ----- : -
AOTVOKIR3DL8*01v1 : ----- : -
AOTVOKIR3DS8*01v2 : ----- : -
AOTVOKIR3DL8*02 : ----- : -
AOTVOKIR4DL9*01 : ----- : -
AOTVOKIR4DS9*01v1 : ----- : -
AOTVOKIR3DL9*01v2 : ----- : -
AOTVOKIR4DL9*02 : ----- : -
AOTVOKIR4DL10*01 : ----- : -
AOTVOKIR3DL10*01v1 : ----- : -
AOTVOKIR4DS10*01v2 : ----- : -
AOTVOKIR3DS10*01v3 : ----- : -
AOTVOKIR3DS10*01v4 : ----- : -

```

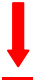

|                    |       |                                                                                                   |       |   |       |   |       |   |       |       |
|--------------------|-------|---------------------------------------------------------------------------------------------------|-------|---|-------|---|-------|---|-------|-------|
|                    | 13120 | *                                                                                                 | 13140 | * | 13160 | * | 13180 | * | 13200 |       |
| BAC_clone_Om       | :     | GGACAGTATTAATCTATTTCATGATGGATCCCATCCCCATGAACCAACCACCTCCCGCTAAGCCCAACCTCCCACACTGGGGGTTAAACTTCAATGT | :     |   | :     |   | :     |   | :     | 13203 |
| AOTVOKIR3DL4*01    | :     | -----                                                                                             | :     |   | :     |   | :     |   | :     | -     |
| AOTVOKIR3DL4*02    | :     | -----                                                                                             | :     |   | :     |   | :     |   | :     | -     |
| AOTVOKIR3DL4*02v1  | :     | -----                                                                                             | :     |   | :     |   | :     |   | :     | -     |
| AOTVOKIR3DL4*02v2  | :     | -----                                                                                             | :     |   | :     |   | :     |   | :     | -     |
| AOTVOKIR3DL4*03    | :     | -----                                                                                             | :     |   | :     |   | :     |   | :     | -     |
| AOTVOKIR3DS4*04    | :     | -----                                                                                             | :     |   | :     |   | :     |   | :     | -     |
| AOTVOKIR3DS4*04v1  | :     | -----                                                                                             | :     |   | :     |   | :     |   | :     | -     |
| AOTVOKIR3DS5*01    | :     | -----                                                                                             | :     |   | :     |   | :     |   | :     | -     |
| AOTVOKIR2DS5*01v1  | :     | -----                                                                                             | :     |   | :     |   | :     |   | :     | -     |
| AOTVOKIR2DS5*01v2  | :     | -----                                                                                             | :     |   | :     |   | :     |   | :     | -     |
| AOTVOKIR3DS7*01    | :     | -----                                                                                             | :     |   | :     |   | :     |   | :     | -     |
| AOTVOKIR3DS7*01v1  | :     | -----                                                                                             | :     |   | :     |   | :     |   | :     | -     |
| AOTVOKIR3DL8*01    | :     | -----                                                                                             | :     |   | :     |   | :     |   | :     | -     |
| AOTVOKIR3DL8*01v1  | :     | -----                                                                                             | :     |   | :     |   | :     |   | :     | -     |
| AOTVOKIR3DS8*01v2  | :     | -----                                                                                             | :     |   | :     |   | :     |   | :     | -     |
| AOTVOKIR3DL8*02    | :     | -----                                                                                             | :     |   | :     |   | :     |   | :     | -     |
| AOTVOKIR4DL9*01    | :     | -----                                                                                             | :     |   | :     |   | :     |   | :     | -     |
| AOTVOKIR4DS9*01v1  | :     | -----                                                                                             | :     |   | :     |   | :     |   | :     | -     |
| AOTVOKIR3DL9*01v2  | :     | -----                                                                                             | :     |   | :     |   | :     |   | :     | -     |
| AOTVOKIR4DL9*02    | :     | -----                                                                                             | :     |   | :     |   | :     |   | :     | -     |
| AOTVOKIR4DL10*01   | :     | -----                                                                                             | :     |   | :     |   | :     |   | :     | -     |
| AOTVOKIR3DL10*01v1 | :     | -----                                                                                             | :     |   | :     |   | :     |   | :     | -     |
| AOTVOKIR4DS10*01v2 | :     | -----                                                                                             | :     |   | :     |   | :     |   | :     | -     |
| AOTVOKIR3DS10*01v3 | :     | -----                                                                                             | :     |   | :     |   | :     |   | :     | -     |
| AOTVOKIR3DS10*01v4 | :     | -----                                                                                             | :     |   | :     |   | :     |   | :     | -     |

|                   |   |                                                                                                |   |       |   |       |   |       |   |       |       |
|-------------------|---|------------------------------------------------------------------------------------------------|---|-------|---|-------|---|-------|---|-------|-------|
|                   | * | 13220                                                                                          | * | 13240 | * | 13260 | * | 13280 | * | 13300 |       |
| BAC_clone_Om      | : | GAGGTTTGAAGAGGATCAAACATCTAAACCAAGCAGTGGTACCATCAGCTCTTTCTGTGGTTACTATGAGAACCGTAACTGAGCCAGCAGGGGA | : |       | : |       | : |       | : |       | 13298 |
| AOTVOKIR3DL4*01   | : | -----                                                                                          | : |       | : |       | : |       | : |       | -     |
| AOTVOKIR3DL4*02   | : | -----                                                                                          | : |       | : |       | : |       | : |       | -     |
| AOTVOKIR3DL4*02v1 | : | -----                                                                                          | : |       | : |       | : |       | : |       | -     |
| AOTVOKIR3DL4*02v2 | : | -----                                                                                          | : |       | : |       | : |       | : |       | -     |
| AOTVOKIR3DL4*03   | : | -----                                                                                          | : |       | : |       | : |       | : |       | -     |
| AOTVOKIR3DS4*04   | : | -----                                                                                          | : |       | : |       | : |       | : |       | -     |
| AOTVOKIR3DS4*04v1 | : | -----                                                                                          | : |       | : |       | : |       | : |       | -     |
| AOTVOKIR3DS5*01   | : | -----                                                                                          | : |       | : |       | : |       | : |       | -     |
| AOTVOKIR2DS5*01v1 | : | -----                                                                                          | : |       | : |       | : |       | : |       | -     |
| AOTVOKIR2DS5*01v2 | : | -----                                                                                          | : |       | : |       | : |       | : |       | -     |
| AOTVOKIR3DS7*01   | : | -----                                                                                          | : |       | : |       | : |       | : |       | -     |
| AOTVOKIR3DS7*01v1 | : | -----                                                                                          | : |       | : |       | : |       | : |       | -     |
| AOTVOKIR3DL8*01   | : | -----                                                                                          | : |       | : |       | : |       | : |       | -     |
| AOTVOKIR3DL8*01v1 | : | -----                                                                                          | : |       | : |       | : |       | : |       | -     |



```

AOTVOKIR3DS8*01v2 : ----- : -
AOTVOKIR3DL8*02   : ----- : -
AOTVOKIR4DL9*01   : ----- : -
AOTVOKIR4DS9*01v1 : ----- : -
AOTVOKIR3DL9*01v2 : ----- : -
AOTVOKIR4DL9*02   : ----- : -
AOTVOKIR4DL10*01  : ----- : -
AOTVOKIR3DL10*01v1 : ----- : -
AOTVOKIR4DS10*01v2 : ----- : -
AOTVOKIR3DS10*01v3 : ----- : -
AOTVOKIR3DS10*01v4 : ----- : -

```

```

                *      13320          *      13340          *      13360          *      13380          *
BAC_clone_Om     : TAGCTGGGTCTCCCACCATCTGGGTGCTTGTCCCTAATGAGACGCTGTGTGGTTACCTGGCAATGAAGAGATGAGAGACGATCCCTGAAGAGGAAC : 13393
AOTVOKIR3DL4*01  : ----- : -
AOTVOKIR3DL4*02  : ----- : -
AOTVOKIR3DL4*02v1 : ----- : -
AOTVOKIR3DL4*02v2 : ----- : -
AOTVOKIR3DL4*03  : ----- : -
AOTVOKIR3DS4*04  : ----- : -
AOTVOKIR3DS4*04v1 : ----- : -
AOTVOKIR3DS5*01  : ----- : -
AOTVOKIR2DS5*01v1 : ----- : -
AOTVOKIR2DS5*01v2 : ----- : -
AOTVOKIR3DS7*01  : ----- : -
AOTVOKIR3DS7*01v1 : ----- : -
AOTVOKIR3DL8*01  : ----- : -
AOTVOKIR3DL8*01v1 : ----- : -
AOTVOKIR3DS8*01v2 : ----- : -
AOTVOKIR3DL8*02  : ----- : -
AOTVOKIR4DL9*01  : ----- : -
AOTVOKIR4DS9*01v1 : ----- : -
AOTVOKIR3DL9*01v2 : ----- : -
AOTVOKIR4DL9*02  : ----- : -
AOTVOKIR4DL10*01 : ----- : -
AOTVOKIR3DL10*01v1 : ----- : -
AOTVOKIR4DS10*01v2 : ----- : -
AOTVOKIR3DS10*01v3 : ----- : -
AOTVOKIR3DS10*01v4 : ----- : -

```

```

                *      13400          *      13420          *      13440          *      13460          *      13480          *
BAC_clone_Om     : TGCCGTGGTCAGCTTCTTACTGTGTTCCCATCTTCCTCCAGGTAACCCAGACACCTGCATGTTCTGATTGGGTCCTCAGTGGTCATCATCCTCT : 13488
AOTVOKIR3DL4*01  : ----- : 1051
AOTVOKIR3DL4*02  : ----- : 1051

```

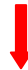

**EXON 7**

```

AOTVOKIR3DL4*02v1 : -----GTAACCCAGACACCTGCACGTTCTGATTGGGTCCTCAGTGGTCATCATCCTTT : 1015
AOTVOKIR3DL4*02v2 : -----GTAACCCAGACACCTGCACGTTCTGATTGGGTCCTCAGTGGTCATCATCCTTT : 1135
AOTVOKIR3DL4*03 : -----GTAACCCAGACACCTGCACATTCTGATTGGGTCCTCAGTGGTCATCATCCTTT : 1051
AOTVOKIR3DS4*04 : -----GTAACCCAGACACCTGCACGTTCTGATTGGGTCCTCAGTGGTCATCATCCTTT : 1051
AOTVOKIR3DS4*04v1 : -----GTAACCCAGACACCTGCACGTTCTGA----- : 1110
AOTVOKIR3DS5*01 : -----GTTTCCCAGACACCTGCACATTCTCATTGAGTGGTCCTCAGTGGTCATCATCCCCT : 1051
AOTVOKIR2DS5*01v1 : -----GTTTCCCAGACACCTGCACATTCTCATTGAGTGGTCCTCAGTGGTCATCATCCCCT : 853
AOTVOKIR2DS5*01v2 : -----GTTTCCCAGACACCTGCACATTCTCATTGAGTGGTCCTCAGTGGTCATCATCCCCT : 766
AOTVOKIR3DS7*01 : -----GTTTGCCAGGCACCTGCACGTTCTCATTGAGTGGTCCTCAGTGGTCATCATCCCCT : 1051
AOTVOKIR3DS7*01v1 : -----GTTTGCCAGGCACCTGCACGTTCTCATTGAGTGGTCCTCAGTGGTCATCATCCCCT : 1220
AOTVOKIR3DL8*01 : -----GTAACCTCAGACACCTGCACGTTCTGATTGGGTCCTCAGTGGTCATCATCCTCT : 1051
AOTVOKIR3DL8*01v1 : -----GTAACCTCAGACACCTGCACGTTCTGATTGGGTCCTCAGTGGTCATCATCCTCT : 1000
AOTVOKIR3DS8*01v2 : -----GTAACCTCAGACACCTGCACGTTCTGATTGGGTCCTCAGTGGTCATCATCCTCT : 1051
AOTVOKIR3DL8*02 : -----GTAACCTCAGACACCTGCACGTTCTGATTGGGTCCTCAGTGGTCATCATCCTCT : 1051
AOTVOKIR4DL9*01 : -----GTAACCCAGACACCTGCACGTTCTGATTGGGTCCTCAGTAGTCATCATCCTCT : 1336
AOTVOKIR4DS9*01v1 : ----- : -
AOTVOKIR3DL9*01v2 : -----GTAACCCAGACACCTGCACGTTCTGATTGGGTCCTCAGTAGTCATCATCCTCT : 1138
AOTVOKIR4DL9*02 : -----GTAACCCAGACACCTGCACGTTCTGATTGGGTCCTCAGTAGTCATCATCCTCT : 1336
AOTVOKIR4DL10*01 : -----GTAACCCAGACACCTGCACGTTCTGATTGGGTCCTCAGTGGTCATCATCCTCT : 1336
AOTVOKIR3DL10*01v1 : -----GTAACCCAGACACCTGCACGTTCTGATTGGGTCCTCAGTGGTCATCATCCTCT : 1135
AOTVOKIR4DS10*01v2 : -----GTAACCCAGACACCTGCACGTTCTGATTGGGTCCTCAGTGGTCATCATCCTCT : 1336
AOTVOKIR3DS10*01v3 : -----GTAACCCAGACACCTGCACGTTCTGATTGGGTCCTCAGTGGTCATCATCCTCT : 1051
AOTVOKIR3DS10*01v4 : ----- : -

```

gt cc cagacacctgcac ttct att gt ctcagt gtcatcatcc t

```

          13500          *          13520          *          13540          *          13560          *          13580
BAC_clone_Om : TCATCATCCTCCTCTTCTTTCTCATTGTCGCTGGTGGTCCAACAAAAAGAGTAAGTCTCATGAAGCAGAGGCCGAGACCTCAGGGCCGTGTGC : 13583
AOTVOKIR3DL4*01 : TCATCATCCTCCTCTTCTTTCTCATTGTCGCTGGTGGTCCAACAAAAAGA----- : 1102
AOTVOKIR3DL4*02 : TCATCATCCTCCTCTTCTTTCTCATTGTCGCTGGTGGTCCAACAAAAAGA----- : 1102
AOTVOKIR3DL4*02v1 : TCATCATCCTCCTCTTCTTTCTCATTGTCGCTGGTGGTCCAACAAAAAGA----- : 1066
AOTVOKIR3DL4*02v2 : TCATCATCCTCCTCTTCTTTCTCATTGTCGCTGGTGGTCCAACAAAAAGA----- : 1186
AOTVOKIR3DL4*03 : TCATCATCCTCCTCTTCTTTCTCATTGTCGCTGGTGGTCCAACAAAAAGA----- : 1102
AOTVOKIR3DS4*04 : TCATCATCCTCCTCTTCTTTCTCATTGTCGCTGGTGGTCCAACAAAAAGA----- : 1102
AOTVOKIR3DS4*04v1 : ----- : -
AOTVOKIR3DS5*01 : TCACCATCCTCCTCTTCTTTCTCCTTCATCTCTGGTGTCTCTGACAAAAGAAG-ACGTCTCACAAGCAGAGTCCAGAGACCCCAGGGCCATGTGT : 1145
AOTVOKIR2DS5*01v1 : TCACCATCCTCCTCTTCTTTCTCCTTCATCTCTGGTGTCTCTGACAAAAGAAG-ACGTCTCACAAGCAGAGTCCAGAGACCCCAGGGCCATGTGT : 947
AOTVOKIR2DS5*01v2 : TCACCATCCTCCTCTTCTTTCTCCTTCATCTCTGGTGTCTCTGACAAAAGAAG-ACGTCTCACAAGCAGAGTCCAGAGACCCCAGGGCCATGTGT : 860
AOTVOKIR3DS7*01 : TCACCATCCTCCTCTTCTTTCTCCTTCATCTCTGGTGTCTCTGACAAAAGAA-TACGTCTCACAAGCAGAGTCCAGAGACCCCAGGGCCATGTGG : 1145
AOTVOKIR3DS7*01v1 : TCACCATCCTCCTCTTCTTTCTCCTTCATCTCTGGTGTCTC----- : 1260
AOTVOKIR3DL8*01 : TCACCATCCTCCTCTTCTTTCTCATTGTCGCTGGTGGTCCAACAAAAAGA----- : 1102
AOTVOKIR3DL8*01v1 : TCACCATCCTCCTCTTCTTTCTCATTGTCGCTGGTGGTCCAACAAAAAGA----- : 1051
AOTVOKIR3DS8*01v2 : TCACCATCCTCCTCTTCTTTCTCATTGTCGCTGGTGGTCCAACAAAAAGA----- : 1102
AOTVOKIR3DL8*02 : TCACCATCCTCCTCTTCTTTCTCATTGTCGCTGGTGGTCCAACAAAAAGA----- : 1102
AOTVOKIR4DL9*01 : TCATCATCCTCCTCTTCTTTCTCATTGTCGCTGGTGGTCCAACAAAAAGA----- : 1387
AOTVOKIR4DS9*01v1 : ----- : -
AOTVOKIR3DL9*01v2 : TCATCATCCTCCTCTTCTTTCTCATTGTCGCTGGTGGTCCAACAAAAAGA----- : 1189

```

```

AOTVOKIR4DL9*02 : TCATCATCCTCCTCTTCTTTCTCATTTCGTCGCTGGTGGTCCAACAAAAAGA----- : 1387
AOTVOKIR4DL10*01 : TCATCATCCTCCTCTTCTTTCTCATTTCGTCGCTGGTGGTCCAACAAAAAGA----- : 1387
AOTVOKIR3DL10*01v1 : TCATCATCCTCCTCTTCTTTCTCATTTCGTCGCTGGTGGTCCAACAAAAAGA----- : 1186
AOTVOKIR4DS10*01v2 : TCATCATCCTCCTCTTCTTTCTCATTTCGTCGCTGGTGGTCCAACAAAAAGA----- : 1387
AOTVOKIR3DS10*01v3 : TCATCATCCTCCTCTTCTTTCTCATTTCGTCGCTGGTGGTCCAACAAAAAGA----- : 1102
AOTVOKIR3DS10*01v4 : ----- : -

```

tca catcctcctcttcttttctc tt tc ctggtg tc acaaaa a

```

* 13600 * 13620 * 13640 * 13660 * 13680
BAC_clone_Om : GGAAGCGGGATGGGAGCACGCGG GTGTGTTCCTCATTGGCGGGTGGTCTCTGGCCCAAGGCAGGAGCTGCAGAGGCAGGGCTTTCTAGAGAG : 13678
AOTVOKIR3DL4*01 : ----- : -
AOTVOKIR3DL4*02 : ----- : -
AOTVOKIR3DL4*02v1 : ----- : -
AOTVOKIR3DL4*02v2 : ----- : -
AOTVOKIR3DL4*03 : ----- : -
AOTVOKIR3DS4*04 : ----- : -
AOTVOKIR3DS4*04v1 : ----- : -
AOTVOKIR3DS5*01 : GGAAGCAGGATGG-AGCATGCAG----- : 1167
AOTVOKIR2DS5*01v1 : GGAAGCAGGATGG-AGCATGCAG----- : 969
AOTVOKIR2DS5*01v2 : GGAAGCAGGATGG-AGCATGCAG----- : 882
AOTVOKIR3DS7*01 : GGAAGCAGGATGG-AGCATGCAG----- : 1167
AOTVOKIR3DS7*01v1 : ----- : -
AOTVOKIR3DL8*01 : ----- : -
AOTVOKIR3DL8*01v1 : ----- : -
AOTVOKIR3DS8*01v2 : ----- : -
AOTVOKIR3DL8*02 : ----- : -
AOTVOKIR4DL9*01 : ----- : -
AOTVOKIR4DS9*01v1 : ----- : -
AOTVOKIR3DL9*01v2 : ----- : -
AOTVOKIR4DL9*02 : ----- : -
AOTVOKIR4DL10*01 : ----- : -
AOTVOKIR3DL10*01v1 : ----- : -
AOTVOKIR4DS10*01v2 : ----- : -
AOTVOKIR3DS10*01v3 : ----- : -
AOTVOKIR3DS10*01v4 : ----- : -

```

```

* 13700 * 13720 * 13740 * 13760 *
BAC_clone_Om : AGCACCAGACACCCTGCCCTGCCCTCAGCTCAGAATCAATGGGATGGAAATTGAGAGCTCTTCATGGGAGGGGTCTTGCACCTCAGAGAGACAG : 13773
AOTVOKIR3DL4*01 : ----- : -
AOTVOKIR3DL4*02 : ----- : -
AOTVOKIR3DL4*02v1 : ----- : -
AOTVOKIR3DL4*02v2 : ----- : -
AOTVOKIR3DL4*03 : ----- : -
AOTVOKIR3DS4*04 : ----- : -
AOTVOKIR3DS4*04v1 : ----- : -

```

```

AOTVOKIR3DS5*01      : ----- : -
AOTVOKIR2DS5*01v1   : ----- : -
AOTVOKIR2DS5*01v2   : ----- : -
AOTVOKIR3DS7*01     : ----- : -
AOTVOKIR3DS7*01v1   : ----- : -
AOTVOKIR3DL8*01     : ----- : -
AOTVOKIR3DL8*01v1   : ----- : -
AOTVOKIR3DS8*01v2   : ----- : -
AOTVOKIR3DL8*02     : ----- : -
AOTVOKIR4DL9*01     : ----- : -
AOTVOKIR4DS9*01v1   : ----- : -
AOTVOKIR3DL9*01v2   : ----- : -
AOTVOKIR4DL9*02     : ----- : -
AOTVOKIR4DL10*01    : ----- : -
AOTVOKIR3DL10*01v1  : ----- : -
AOTVOKIR4DS10*01v2  : ----- : -
AOTVOKIR3DS10*01v3  : ----- : -
AOTVOKIR3DS10*01v4  : ----- : -

```

```

                                13780      *      13800      *      13820      *      13840      *      13860      *
BAC_clone_Om                : AATGTGTGAGTCAGGCTGTTGGCAGCTGAGGGACCTCAGGCACTCATGGCCTCCCCCTGTGTGTTGGTGTCTGCACATGAAATGAGGACACAGAA : 13868
AOTVOKIR3DL4*01             : ----- : -
AOTVOKIR3DL4*02             : ----- : -
AOTVOKIR3DL4*02v1           : ----- : -
AOTVOKIR3DL4*02v2           : ----- : -
AOTVOKIR3DL4*03             : ----- : -
AOTVOKIR3DS4*04             : ----- : -
AOTVOKIR3DS4*04v1           : ----- : -
AOTVOKIR3DS5*01             : ----- : -
AOTVOKIR2DS5*01v1           : ----- : -
AOTVOKIR2DS5*01v2           : ----- : -
AOTVOKIR3DS7*01             : ----- : -
AOTVOKIR3DS7*01v1           : ----- : -
AOTVOKIR3DL8*01             : ----- : -
AOTVOKIR3DL8*01v1           : ----- : -
AOTVOKIR3DS8*01v2           : ----- : -
AOTVOKIR3DL8*02             : ----- : -
AOTVOKIR4DL9*01             : ----- : -
AOTVOKIR4DS9*01v1           : ----- : -
AOTVOKIR3DL9*01v2           : ----- : -
AOTVOKIR4DL9*02             : ----- : -
AOTVOKIR4DL10*01           : ----- : -
AOTVOKIR3DL10*01v1          : ----- : -
AOTVOKIR4DS10*01v2          : ----- : -
AOTVOKIR3DS10*01v3          : ----- : -

```

```

AOTVOKIR3DS10*01v4 : ----- : -
                                     *      *
                                13880      13900      13920      13940      13960
                                     *      *      *      *
BAC_clone_Om      : GGGCCCTCCCAGGTGCTTTGATGACTTCTGTCTCCTACAGATGCTGCTGTAATGAACCAAGAACCTGGGGAGGACAGAAGAGTGAACAGGGAGGT : 13963
AOTVOKIR3DL4*01   : -----ATGCTGCTGTAATGAACCAAGAGCCTGGGGAGGACAGAACAGTGAACAGGGAG-- : 1155
AOTVOKIR3DL4*02   : -----ATGCTGCTGTAATGAACCAAGAACCTGGGGAGGACAGAACAGTGAACAGGGAG-- : 1155
AOTVOKIR3DL4*02v1 : -----ATGCTGCTGTAATGAACCAAGAACCTGGGGAGGACAGAACAGTGAACAGGGAG-- : 1119
AOTVOKIR3DL4*02v2 : -----ATGCTGCTGTAATGAACCAAGAACCTGGGGAGGACAGAACAGTGAACAGGGAG-- : 1239
AOTVOKIR3DL4*03   : -----ATGCTGCTGTAATGAACCAAGAGCCTGGGGAGGACAGAACAGTGAACAGGGAG-- : 1155
AOTVOKIR3DS4*04   : ----- : -
AOTVOKIR3DS4*04v1 : ----- : -
AOTVOKIR3DS5*01   : -----ATGCTGCAGTCAAAGACCAAGAGCCTGGGGCAGACAGAACAGTGA----- : 1209
AOTVOKIR2DS5*01v1 : -----ATGCTGCAGTCAAAGACCAAGAGCCTGGGGCAGACAGAACAGTGA----- : 1011
AOTVOKIR2DS5*01v2 : -----ATGCTGCAGTCAAAGACCAAGAGCCTGGGGCAGACAGAACAGTGA----- : 924
AOTVOKIR3DS7*01   : -----ATGCTGCAGTCAAAGACCAAGAGCCTGGGGTGGACAGGACAGTGA----- : 1209
AOTVOKIR3DS7*01v1 : ----- : -
AOTVOKIR3DL8*01   : -----ATGCTGCTGTAATGAACCAAGAACCTGGGGAGGACAGAACAGTGAACAGGGAG-- : 1155
AOTVOKIR3DL8*01v1 : -----ATGCTGCTGTAATGAACCAAGAACCTGGGGAGGACAGAACAGTGAACAGGGAG-- : 1104
AOTVOKIR3DS8*01v2 : ----- : -
AOTVOKIR3DL8*02   : -----ATGCTGCTGTAATGAACCAAGAACCTGGGGAGGACAGAACAGTGAACAGGGAG-- : 1155
AOTVOKIR4DL9*01   : -----ATGCTGCTGTAATGAACCAAGAACCTGGGGAGGACAGAACAGTGAACAGGGAG-- : 1440
AOTVOKIR4DS9*01v1 : ----- : -
AOTVOKIR3DL9*01v2 : -----ATGCTGCTGTAATGAACCAAGAACCTGGGGAGGACAGAACAGTGAACAGGGAG-- : 1242
AOTVOKIR4DL9*02   : -----ATGCTGCTGTAATGAACCAAGAACCTGGGGAGGACAGAACAGTGAACAGGGAG-- : 1440
AOTVOKIR4DL10*01  : -----ATGCTGCTGTAATGAACCAAGAGCCTGGGGAGGACAGAACAGTGAACAGGGAG-- : 1440
AOTVOKIR3DL10*01v1 : -----ATGCTGCTGTAATGAACCAAGAGCCTGGGGAGGACAGAACAGTGAACAGGGAG-- : 1239
AOTVOKIR4DS10*01v2 : ----- : -
AOTVOKIR3DS10*01v3 : ----- : -
AOTVOKIR3DS10*01v4 : ----- : -
                                     *      *      *      *
                                13980      14000      14020      14040      14060
                                     *      *      *      *
BAC_clone_Om      : AGGTCCTCCTCAACCCAGGCTTGGGGTGGAGACTTATTCCTAATAGTCCCAAAGAATGTGAACCCCTCCGTCCTCAACATTTCTTCTCTCCAG : 14058
AOTVOKIR3DL4*01   : ----- : -
AOTVOKIR3DL4*02   : ----- : -
AOTVOKIR3DL4*02v1 : ----- : -
AOTVOKIR3DL4*02v2 : ----- : -
AOTVOKIR3DL4*03   : ----- : -
AOTVOKIR3DS4*04   : ----- : -
AOTVOKIR3DS4*04v1 : ----- : -
AOTVOKIR3DS5*01   : ----- : -
AOTVOKIR2DS5*01v1 : ----- : -
AOTVOKIR2DS5*01v2 : ----- : -
AOTVOKIR3DS7*01   : ----- : -
AOTVOKIR3DS7*01v1 : ----- : -

```

AOTVOKIR3DL8\*01 : ----- : -  
 AOTVOKIR3DL8\*01v1 : ----- : -  
 AOTVOKIR3DS8\*01v2 : ----- : -  
 AOTVOKIR3DL8\*02 : ----- : -  
 AOTVOKIR4DL9\*01 : ----- : -  
 AOTVOKIR4DS9\*01v1 : ----- : -  
 AOTVOKIR3DL9\*01v2 : ----- : -  
 AOTVOKIR4DL9\*02 : ----- : -  
 AOTVOKIR4DL10\*01 : ----- : -  
 AOTVOKIR3DL10\*01v1 : ----- : -  
 AOTVOKIR4DS10\*01v2 : ----- : -  
 AOTVOKIR3DS10\*01v3 : ----- : -  
 AOTVOKIR3DS10\*01v4 : ----- : -

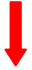

**EXON 9**

BAC\_clone\_Om : **G**GACTCTGAAGAACAAGACCCTCAGGAGGTGACATATGCACAGCTCGATCACTGCAATTTTCACGCAGAGAAAAATCACTCACCCCTCTCAGAGGC : 14153  
 AOTVOKIR3DL4\*01 : -GACTCTGAAGAACAAGACTCTCAGGAGGTGACATACGCACAGCTGGATCACTGCGTTTTTCACGCAGAGAAAAATCACTCATGCCTCTCAGAGGC : 1249  
 AOTVOKIR3DL4\*02 : -GACTCTGAAGAACAAGACTCTCAGGAGGTGACATATGCACAGCTGGATCACTGCGTTTTTCACGCAGAGAAAAATCACTCATGCCTCTCAGAGGC : 1249  
 AOTVOKIR3DL4\*02v1 : -GACTCTGAAGAACAAGACTCTCAGGAGGTGACATATGCACAGCTGGATCACTGCGTTTTTCACGCAGAGAAAAATCACTCATGCCTCTCAGAGGC : 1213  
 AOTVOKIR3DL4\*02v2 : -GACTCTGAAGAACAAGACTCTCAGGAGGTGACATATGCACAGCTGGATCACTGCGTTTTTCACGCAGAGAAAAATCACTCATGCCTCTCAGAGGC : 1333  
 AOTVOKIR3DL4\*03 : -GACTCTGAAGAACAAGACTCTCAGGAGGTGACATACGCACAGCTGGATCACTGCGTTTTTCACGCAGAGAAAAATCACTCATGCCTCTCAGAGGC : 1249  
 AOTVOKIR3DS4\*04 : -GACTCTGAAGAACAAGACCCTCAGGAGG----- : 1130  
 AOTVOKIR3DS4\*04v1 : ----- : -  
 AOTVOKIR3DS5\*01 : ----- : -  
 AOTVOKIR2DS5\*01v1 : ----- : -  
 AOTVOKIR2DS5\*01v2 : ----- : -  
 AOTVOKIR3DS7\*01 : ----- : -  
 AOTVOKIR3DS7\*01v1 : ----- : -  
 AOTVOKIR3DL8\*01 : -GACTCTGAAGAACAAGACTCTCAGGAGGTGACATACGCACAGCTGGATCACTGCGTTTTTCACACAGAGAAAAATCACTCATGCCTCTCAGAGGC : 1249  
 AOTVOKIR3DL8\*01v1 : -GACTCTGAAGAACAAGACTCTCAGGAGGTGACATACGCACAGCTGGATCACTGCGTTTTTCACACAGAGAAAAATCACTCATGCCTCTCAGAGGC : 1198  
 AOTVOKIR3DS8\*01v2 : -GACTC----- : 1107  
 AOTVOKIR3DL8\*02 : -GACTCTGAAGAACAAGACTCTCAGGAGGTGACATACGCACAGCTGGATCACTGCGTTTTTCACACAGAGAAAAATCACTCATGCCTCTCAGAGGC : 1249  
 AOTVOKIR4DL9\*01 : -GACTCTGAAGAACAAGACCCTCAGGAGGTGACATATGCACAGCTGGATCACTGCGTTTTTCACACAGAGAAAAATCACTTGCCCTCTCAGAGGC : 1534  
 AOTVOKIR4DS9\*01v1 : ----- : -  
 AOTVOKIR3DL9\*01v2 : -GACTCTGAAGAACAAGACCCTCAGGAGGTGACATATGCACAGCTGGATCACTGCGTTTTTCACACAGAGAAAAATCACTTGCCCTCTCAGAGGC : 1336  
 AOTVOKIR4DL9\*02 : -GACTCTGAAGAACAAGACCCTCAGGAGGTGACATATGCACAGCTGGATCACTGCGTTTTTCACACAGAGAAAAATCACTTGCCCTCTCAGAGGC : 1534  
 AOTVOKIR4DL10\*01 : -GACTCTGAAGAACAAGACCCTCAGGAGGTGACATATGCACAGCTGGATCACTGCGTTTTTCACACAGAGAAAAATCACTCGCCCTTCTCAGAGGC : 1534  
 AOTVOKIR3DL10\*01v1 : -GACTCTGAAGAACAAGACCCTCAGGAGGTGACATATGCACAGCTGGATCACTGCGTTTTTCACACAGAGAAAAATCACTCGCCCTTCTCAGAGGC : 1333  
 AOTVOKIR4DS10\*01v2 : -GACTC----- : 1392  
 AOTVOKIR3DS10\*01v3 : -GACTC----- : 1107  
 AOTVOKIR3DS10\*01v4 : ----- : -

14160 \* 14180 \* 14200 \* 14220 \*

BAC\_clone\_Om : CCAAGAGACCCCAAAAGAAACCAGTGTGTACATGGAACCTCCCAAATGCGGAGCCAGATTGAAAGTTGTCTCCTGTCCATGA : 14236

AOTVOKIR3DL4\*01 : CCAAGAGACCCCAACAGAAACCAGCGTGTACATGGAACTCCCAAATGCGGAGCCCAGATTGAAAGTTGTCTCCTGTCCATGA : 1329  
AOTVOKIR3DL4\*02 : CCAAGAGACCCCAACAGAAACCAGTGTGTACATGGAACTCCCAAATGCGGAGCCCAGATTGAAAGTTGTCTCCTGTCCATGA : 1329  
AOTVOKIR3DL4\*02v1 : CCAAGAGACCCCAACAGAAACCAGTGTGTACATGGAACTCCCAAATGCGGAGCCCAGATTGAAAGTTGTCTCCTGTCCATGA : 1293  
AOTVOKIR3DL4\*02v2 : CCAAGAGACCCCAACAGAAACCAGTGTGTACATGGAACTCCCAAATGCGGAGCCCAGATTGAAAGTTGTCTCCTGTCCATGA : 1413  
AOTVOKIR3DL4\*03 : CCAAGAGACCCCAACAGAAACCAGCGTGTACATGGAACTCCCAAATGCGGAGCCCAGATTGAAAGTTGTCTCCTGTCCATGA : 1329  
AOTVOKIR3DS4\*04 : ----- : -  
AOTVOKIR3DS4\*04v1 : ----- : -  
AOTVOKIR3DS5\*01 : ----- : -  
AOTVOKIR2DS5\*01v1 : ----- : -  
AOTVOKIR2DS5\*01v2 : ----- : -  
AOTVOKIR3DS7\*01 : ----- : -  
AOTVOKIR3DS7\*01v1 : ----- : -  
AOTVOKIR3DL8\*01 : CCAAGAGACCCCAACAGAAACCAGTGTGTACATGGAACTCCCAAATGCGGAGCCCAGATTGAAAGTTGTCTCCTGTCCATGA : 1329  
AOTVOKIR3DL8\*01v1 : CCAAGAGACCCCAACAGAAACCAGTGTGTACATGGAACTCCCAAATGCGGAGCCCAGATTGAAAGTTGTCTCCTGTCCATG- : 1278  
AOTVOKIR3DS8\*01v2 : ----- : -  
AOTVOKIR3DL8\*02 : CCAAGAGACCCCAACAGAAACCAGTGTGTACATGGAACTCCCAAATGCGGAGCCCAGATTGAAAGTTGTCTCCTGTCCATGA : 1329  
AOTVOKIR4DL9\*01 : CCATGAGAGCCCAACAGAAACCAGTGTGTACATGGAACTCCCAAATGCAGAGCCCGGATTGAAAGTTGTCTCCTGTCCATGA : 1614  
AOTVOKIR4DS9\*01v1 : ----- : -  
AOTVOKIR3DL9\*01v2 : CCATGAGAGCCCAACAGAAACCAGTGTGTACATGGAACTCCCAAATGCAGAGCCCGGATTGAAAGTTGTCTCCTGTCCATGA : 1416  
AOTVOKIR4DL9\*02 : CCATGAGAGCCCAACAGAAACCAGTGTGTACATGGAACTCCCAAATGCAGAGCCCGGATTGAAAGTTGTCTCCTGTCCATGA : 1614  
AOTVOKIR4DL10\*01 : CCAAGAGACCCCAACAGAAACCAGTGTGTACATGGAACTCCCAAATGCGGAGCCCAGATTGAAAGTTGTCTCCTGTCCATGA : 1614  
AOTVOKIR3DL10\*01v1 : CCAAGAGACCCCAACAGAAACCAGTGTGTACATGGAACTCCCAAATGCGGAGCCCAGATTGAAAGTTGTCTCCTGTCCATG- : 1413  
AOTVOKIR4DS10\*01v2 : ----- : -  
AOTVOKIR3DS10\*01v3 : ----- : -  
AOTVOKIR3DS10\*01v4 : ----- : -
